# Supplementary material
Source: PubMed Central journal article supplement (PMC2873185)
Supplement: djq102_1.pdf [file djq102_1.pdf]

## **Supplementary Materials and Methods**

**Antibodies used in western blots:** mouse monoclonal anti-ER $\alpha$  (Santa Cruz, Inc. sc-8002; dilution 1:1000), rabbit polyclonal anti-p27 (Santa Cruz, Inc. sc-528; dilution 1:500), rabbit polyclonal anti-FOXO3 (Millipore, 07-702; dilution 1:1000), rabbit polyclonal anti-MET (Santa Cruz, Inc. sc-10; dilution 1:500), rabbit polyclonal anti-BIM (Santa Cruz, Inc. sc-11425; dilution 1:1500), mouse monoclonal anti-HA-HRP conjugates (La Roche; dilution 1:500), rabbit polyclonal anti-Drosha (Santa Cruz, Inc. sc-33778; dilution 1:500), rabbit polyclonal anti-ERBB2 (Santa Cruz, Inc. sc-134481; dilution 1:500), mouse monoclonal anti-GAPDH (Calbiochem CB1001; dilution 1:10000).

### **Primers**

#### **a) Luciferase Assay Cloning:**

##### **MET and FOXO3 3'UTR:**

MET3UTR wt Forw: 5`TCTAGAGCCTCCTTCTGGGAGACATCATAGTGC 3`

MET3UTR wt Rev: 5` TCTAGACAGCTGCAGGTATAGGCAGTGACAAG 3`

FOXO3UTR wt Forw: 5` TCTAGAGGTAGACGGAATAGTTGGGACC 3`

FOXO3UTR wt Rev: 5` TCTAGACTCACTCCCAAAGCAGCTCCCAGGG 3`

##### **CDKN1B Promoter:**

p27prom Forw: 5`CGAGCTCGCCTCGAGGAAGGACTGAAACTGTGTGCTTGCGGT 3`

p27prom Rev: 5`CTAGCTAGCTAGCGAAGAAGAAAATGATTGACACGGCGAGT 3`

##### **miR221&222 Promoter:**

-3000/-1600 pGL3b Forw: 5`gctagcacttccacatatagtccttagggtc 3`

-3000/-1600 pGL3b Rev: 5` ctcgagaccagtgtggtagctcttggtggg 3`

-1600 pGL3b Forw: 5`gtagccccaccaagagctaaccacactggt 3`

-1000pGL3b Forw: 5` gtagccctagccaccttatcgaaaatagcattcc 3`

-600 pGL3b Forw: 5` gtagcctgacatgctagtgacacactgc 3`

-200 pGL3b Forw: 5`gtagcgttgctgctggatctccagcacc 3`

-150 pGL3b Forw: 5` gctagcccagaggtgttttaaattacgta 3`

-50 pGL3b Forw: 5` ctagctagctagctttttctccacagagccctcccagaaggcaaggatcacccagctccgctcgagcgg 3`

-50 pGL3b Rev: 5` ccgctcgagcggagctgggtgatcctttgccttctggggaggctctgtggaagaaaaagctagctagctag 3`

-200/ERE Rev: 5` ctcgaggtgtgtaattcaaggtaaagtttc 3`

miR222 pGL3b Rev: 5` ctcgagagctgggtgatcctttgccttctg 3`

**b) Probes for Agarose Northern Blot:**

miR221 UP forward: 5` cttgaatgcagtaggcagttgtgt 3`

miR221 Down reverse: 5` ctccactggtttatacctcctgga 3`

miR222 UP forward: 5` gtcactcagtcagtatctgttgga 3`

miR222 Down reverse: 5` gtgtgtaattcaaggtaaagtttc 3`

**c) Chromatin Immunoprecipitation Primers:**

1F: 5` ggattctaagacgtgtacttggag 3`

1R: 5` cttgcactcacggaagttaagtc 3`

2F: 5` gtcactcagtcagtatctgttgga 3`

2R: 5` gtgtgtaattcaaggtaaagtttc 3`

3F: 5` ctacctacctatctaccct 3`

3R: 5` caacagtcagaaatgctgggactt 3`

**d) ER $\alpha$ -expressing Vectors:**

forward primers: 5` ggtaccatgaccatgaccctccacaccaaagc 3`

reverse primers: 5` gatatcccgtgtgggagccagggagctctcag 3`
