# Supplementary material
Source: PubMed Central journal article supplement (PMC2873185)
Supplement: djq102_2.pdf [file djq102_2.pdf]

**Supplementary Table 1. Differentially expressed genes in miR-221, miR222, and miR-206-overexpressing MCF7 cells. Differentially expressed genes were selected using P less than .01 and fold change greater than 1.5 or less than -1.5. The false discovery rate (FDR) was set at 0.1 in the data analysis. Genes are listed according to their fold change (FC) value.**

| Genes modulated by miR-206 |          |          | Genes modulated by miR-221 |            |          | Genes modulated by miR-222 |            |          |
|----------------------------|----------|----------|----------------------------|------------|----------|----------------------------|------------|----------|
| Gene symbol                | P        | FC       | Gene symbol                | P          | FC       | Gene symbol                | P          | FC       |
| RP13-102H20.1              | 2.00E-14 | -23.6034 | CAV1                       | 2.63E-11   | -44.2853 | CAV1                       | 3.81E-11   | -37.2977 |
| METTL7A                    | 2.83E-08 | -10.1942 | RP13-102H20.1              | 1.73E-14   | -25.0136 | RP13-102H20.1              | 1.77E-14   | -24.8001 |
| TRERF1                     | 5.13E-09 | -9.60714 | COL21A1                    | 4.30E-08   | -20.9494 | CAV1                       | 9.52E-09   | -21.8943 |
| ---                        | 1.76E-08 | -9.42483 | CAV1                       | 1.11E-08   | -20.6578 | MGP                        | 7.80E-12   | -16.6806 |
| /// LOC728715 /// O        | 9.24E-08 | -8.29951 | MGP                        | 1.09E-11   | -14.8721 | COL21A1                    | 2.57E-07   | -11.2541 |
| HHLA3                      | 1.56E-08 | -7.35987 | COL12A1                    | 2.14E-06   | -14.3838 | CYP26B1                    | 6.56E-08   | -10.8139 |
| CDSN                       | 3.46E-09 | -7.29673 | COL12A1                    | 6.02E-09   | -11.4886 | COL12A1                    | 1.15E-05   | -8.43053 |
| ---                        | 7.67E-09 | -7.17857 | CYP26B1                    | 6.38E-08   | -10.9099 | IGSF1                      | 2.58E-08   | -8.32609 |
| PKP1                       | 6.73E-08 | -6.85972 | IGSF1                      | 1.56E-08   | -9.56479 | PTGER3                     | 1.08E-07   | -7.85269 |
| CYP26B1                    | 3.56E-07 | -6.79878 | FNIP2                      | 1.72E-07   | -7.93883 | COL12A1                    | 2.95E-08   | -7.36174 |
| SLC44A1                    | 3.97E-11 | -6.098   | PTGER3                     | 1.17E-07   | -7.67253 | ---                        | 1.11E-08   | -7.03866 |
| NMU                        | 2.97E-08 | -6.08934 | CAV2                       | 2.81E-07   | -7.37851 | PKP1                       | 6.10E-08   | -7.02871 |
| CXCL12                     | 4.19E-09 | -5.77776 | ---                        | 1.23E-05   | -7.27254 | OPN3                       | 2.05E-09   | -6.94084 |
| ---                        | 5.55E-06 | -5.5565  | CDSN                       | 4.25E-09   | -6.93747 | ---                        | 1.89E-05   | -6.50571 |
| CDSN                       | 6.72E-06 | -5.49871 | PKP1                       | 6.45E-08   | -6.93385 | CDSN                       | 6.09E-09   | -6.36314 |
| CASC5                      | 7.39E-09 | -5.47478 | PTGER3                     | 7.87E-07   | -6.75118 | FNIP2                      | 5.16E-07   | -6.0407  |
| SLC44A1                    | 1.48E-10 | -5.45095 | CD44                       | 5.70E-11   | -6.15737 | ---                        | 4.82E-06   | -6.02793 |
| KLF13                      | 2.33E-07 | -5.43618 | NAV2                       | 3.48E-07   | -5.86496 | NAV2                       | 3.10E-07   | -6.02022 |
| ---                        | 7.68E-07 | -5.29385 | CXCL12                     | 3.95E-09   | -5.85219 | PTGER3                     | 1.28E-06   | -6.00061 |
| C14orf145                  | 8.47E-06 | -5.2836  | ---                        | 5.67E-06   | -5.80107 | CXCL12                     | 5.18E-09   | -5.51625 |
| SLC35B4                    | 3.00E-06 | -5.25633 | ---                        | 2.93E-08   | -5.61009 | PGR                        | 7.88E-11   | -5.46657 |
| ---                        | 1.37E-11 | -5.24951 | PGR                        | 7.00E-11   | -5.60818 | PALLD                      | 1.47E-05   | -5.35719 |
| TAGLN2                     | 1.13E-10 | -5.15416 | ---                        | 1.12E-05   | -5.50414 | CDSN                       | 7.56E-06   | -5.35333 |
| RPL31                      | 1.99E-08 | -5.12228 | CDSN                       | 7.44E-06   | -5.3735  | PTGER3                     | 0.00014135 | -5.23818 |
| C18orf10                   | 1.52E-09 | -5.0919  | ANXA3                      | 1.54E-07   | -5.14305 | RBM24                      | 1.32E-09   | -5.03153 |
| ---                        | 1.20E-06 | -5.02565 | PALLD                      | 2.98E-05   | -5.13761 | ---                        | 1.68E-05   | -5.02294 |
| MFAP2                      | 2.18E-06 | -4.95794 | SFXN2                      | 6.00E-10   | -5.11928 | PALLD                      | 3.48E-05   | -4.96252 |
| MPHOSPH9                   | 8.59E-06 | -4.81599 | ---                        | 1.16E-07   | -5.07725 | PRSS23                     | 1.10E-07   | -4.91262 |
| ---                        | 3.18E-06 | -4.80398 | PTGER3                     | 0.00016371 | -5.0589  | CAV2                       | 2.38E-06   | -4.54551 |
| SYCP2                      | 7.97E-08 | -4.79122 | AMMECR1                    | 1.29E-07   | -5.03772 | AMMECR1                    | 2.17E-07   | -4.54089 |
| TAGLN2                     | 2.81E-10 | -4.78486 | CAV2                       | 4.79E-08   | -5.03672 | ATRNL1                     | 2.91E-08   | -4.53336 |
| NRNPA3P2 /// NDRC          | 2.13E-08 | -4.72753 | PGR                        | 1.71E-09   | -5.02162 | IGSF1                      | 1.09E-05   | -4.50255 |
| ---                        | 0.00011  | -4.71682 | CD44                       | 8.28E-06   | -4.99488 | S100A10                    | 7.71E-07   | -4.48158 |
| BRI3BP                     | 5.65E-11 | -4.70053 | RBM24                      | 1.40E-09   | -4.97093 | 8 /// ANXA8L1 /// AN       | 3.02E-06   | -4.40477 |
| 4 /// LOC100133005 /       | 1.76E-09 | -4.69878 | PRSS23                     | 1.07E-07   | -4.93648 | PGR                        | 3.39E-09   | -4.39273 |
| ---                        | 1.32E-06 | -4.65878 | ATRNL1                     | 2.39E-08   | -4.71298 | KMO                        | 2.77E-07   | -4.33822 |
| GINS4                      | 1.22E-05 | -4.6021  | ---                        | 3.31E-05   | -4.45073 | HCK                        | 2.33E-07   | -4.32368 |
| CENPI                      | 1.24E-06 | -4.53462 | 8 /// ANXA8L1 /// AN       | 2.89E-06   | -4.44377 | GJA1                       | 1.21E-08   | -4.31464 |
| ---                        | 1.25E-10 | -4.5336  | RAMP3                      | 1.60E-06   | -4.4325  | FNIP2                      | 2.92E-06   | -4.29208 |
| SLC44A1                    | 3.83E-07 | -4.49806 | HCK                        | 2.20E-07   | -4.36845 | ---                        | 3.91E-06   | -4.27786 |
| POLQ                       | 5.06E-07 | -4.4424  | GJA1                       | 1.17E-08   | -4.33805 | AGR3                       | 1.02E-08   | -4.27197 |
| KIF16B                     | 5.70E-06 | -4.42278 | PTGER3                     | 0.00040581 | -4.32247 | CD44                       | 3.55E-10   | -4.24047 |

|                      |          |          |                     |            |          |                     |            |          |
|----------------------|----------|----------|---------------------|------------|----------|---------------------|------------|----------|
| ---                  | 2.03E-07 | -4.39726 | FNIP2               | 2.85E-06   | -4.31086 | SFXN2               | 1.84E-09   | -4.13009 |
| GJA1                 | 1.13E-08 | -4.37107 | ---                 | 2.64E-09   | -4.21844 | AMMECR1             | 1.20E-07   | -4.12877 |
| ---                  | 1.33E-09 | -4.34529 | RDHE2               | 0.00011403 | -4.21671 | ---                 | 3.64E-07   | -4.06601 |
| AFAP1L2              | 8.46E-09 | -4.34263 | DEPDC6              | 5.35E-10   | -4.16821 | ---                 | 3.44E-09   | -4.02463 |
| SMARCA1              | 1.56E-07 | -4.32135 | ---                 | 7.92E-06   | -4.16818 | CAV2                | 1.60E-07   | -4.00003 |
| ANKRD57              | 1.57E-08 | -4.32031 | FNIP2               | 2.87E-08   | -4.13912 | FOXC1               | 1.58E-06   | -3.99067 |
| ---                  | 2.77E-06 | -4.32025 | ---                 | 3.47E-06   | -4.12575 | ---                 | 2.88E-05   | -3.94682 |
| SERP1                | 2.83E-08 | -4.25692 | ATRNL1              | 1.75E-09   | -4.08258 | VCAN                | 2.40E-07   | -3.92295 |
| CCDC111              | 6.63E-05 | -4.22644 | PALLD               | 5.42E-05   | -4.066   | KMO                 | 2.84E-06   | -3.90976 |
| TCF19                | 1.18E-07 | -4.20821 | C100130886 /// TMEM | 2.18E-10   | -4.01083 | ELOVL2              | 2.18E-05   | -3.90787 |
| SERP1                | 1.12E-08 | -4.20222 | RHOF                | 2.29E-06   | -3.97411 | ---                 | 2.63E-05   | -3.8969  |
| ---                  | 1.32E-06 | -4.1865  | IGSF1               | 2.12E-05   | -3.95736 | FNIP2               | 4.05E-08   | -3.89473 |
| LOC91431             | 1.86E-06 | -4.16502 | VCAN                | 2.33E-07   | -3.94517 | ---                 | 6.50E-05   | -3.89405 |
| KIAA0841             | 2.63E-06 | -4.15027 | AGR3                | 1.65E-08   | -3.91891 | AGR2                | 5.62E-09   | -3.86397 |
| CIT                  | 1.19E-08 | -4.13338 | C100130886 /// TMEM | 4.06E-10   | -3.88307 | ANXA3               | 7.02E-07   | -3.8436  |
| 1 /// DDX12 /// LOC6 | 3.19E-06 | -4.121   | C20orf175           | 6.30E-07   | -3.8261  | UGT2B15             | 4.85E-10   | -3.74376 |
| ASPM                 | 2.92E-06 | -4.12089 | AMMECR1             | 1.85E-07   | -3.8253  | C20orf175           | 7.34E-07   | -3.7262  |
| HCK                  | 3.06E-07 | -4.10963 | COL5A2              | 0.00012789 | -3.80946 | CD44                | 4.02E-05   | -3.65948 |
| BRCA1                | 9.89E-07 | -4.07829 | FOXC1               | 2.24E-06   | -3.75093 | FILIP1L             | 5.07E-05   | -3.6443  |
| XPNPEP3              | 2.61E-06 | -4.07632 | HEY2                | 1.98E-09   | -3.68919 | C100130886 /// TMEM | 3.92E-10   | -3.63353 |
| LOC284702            | 3.58E-05 | -4.07033 | MYB                 | 1.12E-10   | -3.68408 | ---                 | 7.64E-06   | -3.62301 |
| ASF1B                | 2.33E-10 | -4.06782 | C100130886 /// TMEM | 3.07E-10   | -3.60996 | RDHE2               | 0.00024631 | -3.62072 |
| CDC42SE1             | 0.00496  | -4.02812 | PALLD               | 5.55E-09   | -3.57178 | JAK2                | 4.83E-08   | -3.6093  |
| LOC100129951         | 2.78E-10 | -4.0035  | RBM15               | 6.87E-06   | -3.53613 | C15orf48            | 2.42E-08   | -3.57439 |
| TWF1                 | 3.39E-07 | -3.98073 | FILIP1L             | 6.13E-05   | -3.52232 | RAMP3               | 5.32E-06   | -3.56562 |
| GOLSYN               | 3.99E-09 | -3.97207 | ---                 | 0.00032779 | -3.5222  | PTGER3              | 0.00104448 | -3.53895 |
| ---                  | 4.02E-05 | -3.95975 | JAK2                | 5.77E-08   | -3.50641 | LTBP1               | 9.92E-08   | -3.49033 |
| SMARCD3              | 1.17E-06 | -3.95116 | DPY19L1             | 5.96E-05   | -3.4925  | ZNF652              | 0.00130065 | -3.4901  |
| 8 /// ANXA8L1 /// AN | 5.44E-06 | -3.94163 | UGT2B15             | 7.54E-10   | -3.48608 | ---                 | 5.64E-13   | -3.47575 |
| ---                  | 2.35E-06 | -3.89914 | KMO                 | 5.75E-06   | -3.4629  | ATRNL1              | 4.78E-09   | -3.45335 |
| ANKRD57              | 1.92E-09 | -3.88312 | C14orf147           | 6.21E-10   | -3.4511  | ---                 | 9.52E-06   | -3.45197 |
| ---                  | 4.18E-09 | -3.87438 | FLJ13137            | 1.87E-08   | -3.41892 | HEY2                | 3.14E-09   | -3.42763 |
| RFWD3                | 1.37E-08 | -3.84935 | ---                 | 6.51E-13   | -3.39992 | AMMECR1             | 6.81E-09   | -3.42646 |
| ASPM                 | 1.87E-05 | -3.81796 | ---                 | 1.49E-05   | -3.37012 | C100130886 /// TMEM | 8.78E-10   | -3.42591 |
| ACPL2                | 1.43E-07 | -3.79793 | ---                 | 7.28E-10   | -3.3694  | PALLD               | 7.29E-09   | -3.42157 |
| OC100128843 /// POL  | 3.21E-05 | -3.72702 | CXCL12              | 1.59E-10   | -3.31845 | ---                 | 2.73E-05   | -3.34517 |
| ---                  | 1.42E-06 | -3.70786 | ELOVL2              | 5.68E-05   | -3.30183 | FLJ21272            | 4.72E-07   | -3.33247 |
| C4orf34              | 7.99E-09 | -3.70524 | COL12A1             | 0.00088931 | -3.29684 | MYB                 | 2.15E-10   | -3.32648 |
| CENPI                | 3.26E-08 | -3.68295 | RLN2                | 1.15E-09   | -3.28181 | ELOVL2              | 2.53E-07   | -3.32121 |
| RABGAP1L             | 5.00E-06 | -3.67051 | CD44                | 2.08E-09   | -3.27978 | KCNK2               | 6.58E-08   | -3.29035 |
| NCAPH                | 1.05E-05 | -3.66086 | AGR2                | 1.64E-08   | -3.25515 | RHOF                | 7.23E-06   | -3.27137 |
| RDHE2                | 0.00023  | -3.6591  | ---                 | 1.51E-05   | -3.23859 | RAPGEFL1            | 1.11E-07   | -3.26545 |
| KIF15                | 3.15E-06 | -3.65577 | KMO                 | 1.66E-06   | -3.20213 | UGT2B15             | 3.99E-07   | -3.26433 |
| NEIL3                | 9.40E-07 | -3.64602 | ---                 | 6.99E-08   | -3.18884 | C9orf61             | 2.12E-05   | -3.22704 |
| E2F2                 | 1.18E-06 | -3.64173 | SEMA3C              | 7.78E-08   | -3.1831  | C4orf19             | 2.30E-05   | -3.21769 |
| HPS4                 | 7.18E-06 | -3.63708 | AMMECR1             | 1.13E-08   | -3.1735  | C100130886 /// TMEM | 6.67E-10   | -3.20439 |
| LIG1                 | 5.88E-10 | -3.60819 | RAPGEFL1            | 1.41E-07   | -3.14976 | DPY19L1             | 0.00010076 | -3.19387 |
| OGG1                 | 2.03E-05 | -3.60129 | RUNX1               | 9.28E-07   | -3.14563 | ---                 | 1.06E-09   | -3.18378 |
| NOVA1                | 1.67E-06 | -3.59494 | ---                 | 3.99E-08   | -3.13984 | GOLSYN              | 1.77E-08   | -3.13323 |

|                       |          |          |                    |            |          |                     |            |          |
|-----------------------|----------|----------|--------------------|------------|----------|---------------------|------------|----------|
| HSPA2                 | 8.72E-08 | -3.59274 | ELOVL2             | 3.71E-07   | -3.13515 | LOC100129951        | 6.37E-05   | -3.13208 |
| VCAN                  | 4.06E-07 | -3.58766 | ZNF185             | 3.06E-07   | -3.12486 | PLEKHA2             | 6.26E-06   | -3.12237 |
| PPP1R1C               | 3.62E-07 | -3.58525 | MEIS1              | 8.02E-07   | -3.09381 | FILIP1L             | 7.61E-06   | -3.10603 |
| PSIP1                 | 4.51E-06 | -3.58476 | S100A10            | 6.88E-06   | -3.07999 | LOC100129951        | 1.39E-09   | -3.10546 |
| CRTAP                 | 1.98E-10 | -3.57955 | UGT2B15            | 5.92E-07   | -3.07809 | COL5A2              | 0.00040045 | -3.09742 |
| TCFL5                 | 5.68E-06 | -3.56925 | LOC100129951       | 1.49E-09   | -3.07482 | GNA12               | 1.88E-06   | -3.06696 |
| HELLS                 | 2.30E-09 | -3.5498  | GNA12              | 1.91E-06   | -3.05884 | LOC727820           | 9.69E-08   | -3.02756 |
| ---                   | 2.18E-05 | -3.545   | ---                | 0.00011014 | -3.04425 | A4 /// UGT1A5 /// U | 9.99E-07   | -2.99706 |
| MLF1IP                | 1.21E-06 | -3.54447 | FOSL2              | 9.45E-09   | -3.01597 | SLC16A6             | 5.64E-07   | -2.99252 |
| HIGD1A                | 1.09E-05 | -3.52742 | GOLSYN             | 2.54E-08   | -2.97785 | ---                 | 1.88E-08   | -2.98587 |
| NETO2                 | 6.15E-08 | -3.52134 | C15orf48           | 8.63E-08   | -2.9544  | ANKRD36B            | 3.28E-07   | -2.98272 |
| G6PD                  | 2.25E-11 | -3.51892 | CD44               | 1.43E-06   | -2.94328 | AREG /// LOC727738  | 1.58E-09   | -2.97545 |
| GTSE1                 | 1.22E-07 | -3.5176  | SYTL4              | 2.15E-07   | -2.94038 | FLJ13137            | 4.85E-08   | -2.9724  |
| PDHA1                 | 9.37E-09 | -3.5136  | C9orf61            | 3.99E-05   | -2.92691 | COL12A1             | 0.00159611 | -2.96064 |
| NOTCH3                | 3.70E-10 | -3.50124 | TMCC1              | 9.93E-06   | -2.91745 | RUNX1               | 1.43E-06   | -2.95485 |
| HELLS                 | 4.19E-08 | -3.49891 | HNMT               | 1.49E-05   | -2.9125  | GRHL1               | 1.69E-05   | -2.91223 |
| PPIA                  | 2.73E-11 | -3.49764 | ---                | 2.05E-07   | -2.90229 | LOC727820           | 1.53E-08   | -2.87642 |
| KIAA0101              | 1.84E-08 | -3.4791  | KLF4               | 1.53E-07   | -2.89147 | DEPDC6              | 6.12E-09   | -2.85758 |
| MPHOSPH9              | 3.99E-07 | -3.47398 | OPN3               | 2.33E-07   | -2.89126 | BLNK                | 6.01E-06   | -2.84067 |
| C4orf19               | 1.49E-05 | -3.45499 | TMCC1              | 1.09E-05   | -2.87154 | CXCL12              | 4.96E-10   | -2.82729 |
| LOC442075             | 8.62E-08 | -3.44736 | ANKRD36B           | 4.54E-07   | -2.85129 | PLEKHA2             | 2.19E-06   | -2.82638 |
| CRTAP                 | 5.14E-08 | -3.43816 | ---                | 2.08E-06   | -2.84792 | PAPSS2              | 8.27E-08   | -2.82336 |
| NDE1                  | 2.21E-09 | -3.42592 | C3                 | 1.88E-06   | -2.81282 | S100A8              | 5.12E-08   | -2.78687 |
| PRCP                  | 2.49E-08 | -3.42562 | ---                | 2.20E-07   | -2.81233 | AMZ1                | 1.37E-06   | -2.78684 |
| FBXO3                 | 3.62E-06 | -3.42478 | KCNK2              | 2.02E-07   | -2.80583 | SYCE2               | 6.75E-08   | -2.7834  |
| LOC100130886 /// TMEM | 5.73E-10 | -3.42097 | GARNL1             | 7.09E-07   | -2.79652 | SLC16A6             | 5.42E-08   | -2.76683 |
| ---                   | 0.00037  | -3.40697 | SYTL5              | 1.11E-07   | -2.79138 | PAPSS2              | 1.15E-09   | -2.75656 |
| TWF1                  | 1.62E-08 | -3.40559 | C7orf41            | 9.34E-06   | -2.79051 | ABCA11              | 4.05E-07   | -2.73251 |
| COL21A1               | 4.36E-05 | -3.40557 | C4orf19            | 6.06E-05   | -2.7788  | SYTL5               | 1.40E-07   | -2.70931 |
| BLM                   | 2.56E-08 | -3.40327 | ---                | 0.00024957 | -2.74657 | ---                 | 6.58E-06   | -2.70783 |
| HELLS                 | 3.75E-06 | -3.3743  | PRUNE              | 4.54E-07   | -2.74425 | SCUBE2              | 4.39E-09   | -2.6814  |
| LASP1                 | 3.30E-09 | -3.37119 | RPL13              | 3.43E-08   | -2.7299  | THSD4               | 1.19E-08   | -2.66203 |
| CDC25C                | 2.52E-07 | -3.36536 | SCUBE2             | 3.85E-09   | -2.72545 | RLN2                | 5.50E-09   | -2.65295 |
| FOXM1                 | 1.71E-08 | -3.36371 | SYCE2              | 8.04E-08   | -2.72139 | LOC81691            | 1.60E-05   | -2.65265 |
| NAV2                  | 6.30E-06 | -3.35751 | ADCY1              | 1.79E-08   | -2.71079 | TXNDC12             | 1.59E-10   | -2.65185 |
| MYBL2                 | 1.09E-08 | -3.35539 | FLJ21272           | 2.06E-06   | -2.7015  | CAP2                | 3.79E-08   | -2.65013 |
| POLQ                  | 2.58E-06 | -3.35008 | ---                | 2.32E-05   | -2.69567 | ---                 | 1.59E-07   | -2.62615 |
| HS3ST3A1              | 5.50E-08 | -3.32921 | ---                | 1.01E-05   | -2.68456 | RAB31               | 6.71E-10   | -2.62109 |
| KIF14                 | 2.01E-06 | -3.32657 | SGPL1              | 8.97E-10   | -2.68248 | ---                 | 2.08E-06   | -2.61556 |
| CEP72                 | 3.01E-05 | -3.32585 | LTBP1              | 6.24E-07   | -2.68233 | RAB31               | 4.62E-09   | -2.60174 |
| LOC100130886 /// TMEM | 1.09E-09 | -3.31529 | VAV3               | 4.96E-06   | -2.66343 | G3BP1               | 1.55E-07   | -2.59553 |
| ---                   | 1.09E-06 | -3.30158 | LOC727820          | 2.88E-08   | -2.65118 | GREB1               | 4.96E-05   | -2.59334 |
| CAPS                  | 6.21E-06 | -3.28814 | AREG /// LOC727738 | 3.93E-09   | -2.64269 | PAPSS2              | 1.92E-05   | -2.58893 |
| SYT1                  | 1.36E-08 | -3.28693 | C1orf198           | 3.82E-07   | -2.64113 | RBM15               | 5.56E-05   | -2.58514 |
| ---                   | 1.53E-08 | -3.28486 | ---                | 6.58E-08   | -2.62936 | SYTL4               | 0.00083849 | -2.58131 |
| TNNT1                 | 1.94E-12 | -3.27125 | ---                | 8.15E-06   | -2.62675 | LTBP1               | 8.09E-08   | -2.56999 |
| SLC12A5               | 1.61E-07 | -3.27008 | GREB1              | 4.53E-05   | -2.62534 | RASGRP1             | 0.00059889 | -2.56583 |
| ST6GALNAC2            | 6.80E-12 | -3.26954 | PRUNE              | 6.47E-09   | -2.62366 | DOK3                | 9.40E-05   | -2.56199 |
| GPD2                  | 1.19E-06 | -3.25746 | LOC727820          | 2.86E-07   | -2.62314 | LPCAT1              | 5.28E-10   | -2.55779 |

|                       |          |          |                       |            |          |                      |            |          |
|-----------------------|----------|----------|-----------------------|------------|----------|----------------------|------------|----------|
| TIMP2                 | 1.07E-05 | -3.25341 | HEY2                  | 8.44E-10   | -2.6212  | LRIG1                | 3.13E-08   | -2.54384 |
| COL27A1               | 8.84E-07 | -3.25082 | ---                   | 5.17E-08   | -2.61651 | ---                  | 9.09E-09   | -2.54111 |
| ATG4C /// CTR9        | 1.80E-06 | -3.24061 | PHLDA1                | 0.00011485 | -2.61575 | EIF2S3               | 1.94E-07   | -2.54044 |
| RALGPS1               | 4.34E-08 | -3.22872 | PAPSS2                | 1.54E-07   | -2.6081  | KLF4                 | 4.30E-07   | -2.53271 |
| ASRGL1                | 7.16E-06 | -3.2172  | DPY19L3               | 1.73E-06   | -2.6074  | CCDC18               | 0.00014438 | -2.52874 |
| SPC24                 | 6.14E-06 | -3.20382 | ---                   | 9.17E-07   | -2.60401 | ---                  | 2.09E-07   | -2.52438 |
| DIMT1L                | 1.85E-06 | -3.19917 | ---                   | 2.25E-06   | -2.59001 | l3orf18 /// LOC72897 | 1.77E-08   | -2.51832 |
| LOC150759             | 1.94E-05 | -3.19706 | CD44                  | 1.31E-07   | -2.58728 | A4 /// UGT1A5 /// U  | 9.49E-06   | -2.5125  |
| CDC42SE1              | 3.65E-06 | -3.19372 | ANKRD36B              | 1.19E-07   | -2.57103 | ---                  | 6.67E-05   | -2.4995  |
| PRSS23                | 1.27E-06 | -3.19352 | ZNF652                | 3.06E-09   | -2.56213 | ZNF185               | 1.70E-06   | -2.48956 |
| PACSN1                | 6.26E-05 | -3.19311 | ---                   | 1.02E-05   | -2.55802 | HEY2                 | 1.31E-09   | -2.48919 |
| JARID1C               | 5.00E-05 | -3.18331 | FIGN                  | 6.77E-07   | -2.55674 | MGC16121             | 0.00079872 | -2.48417 |
| CDC42SE1              | 2.85E-05 | -3.17684 | LTBP1                 | 8.49E-08   | -2.55522 | SDC2                 | 1.92E-09   | -2.48164 |
| IGSF1                 | 2.87E-06 | -3.17292 | BLNK                  | 1.34E-05   | -2.55392 | FIGN                 | 0.0021012  | -2.48117 |
| AURKB                 | 0.00025  | -3.16934 | VAV3                  | 8.83E-05   | -2.55072 | ---                  | 0.00017447 | -2.47702 |
| KIF4A                 | 1.45E-07 | -3.16882 | ---                   | 6.58E-07   | -2.54966 | C1orf198             | 6.61E-07   | -2.47157 |
| ---                   | 3.09E-06 | -3.16844 | l13orf18 /// LOC72897 | 1.60E-08   | -2.54894 | SGK1                 | 1.44E-09   | -2.45533 |
| LOC100132798          | 1.79E-08 | -3.16822 | FOSL2                 | 5.48E-11   | -2.54216 | THSD4                | 1.91E-07   | -2.45059 |
| KLHDC5                | 3.48E-07 | -3.16549 | LRIG1                 | 3.15E-08   | -2.54168 | ---                  | 6.73E-06   | -2.44934 |
| TYMS                  | 1.30E-09 | -3.16491 | AHNAK2                | 0.0116724  | -2.54129 | MEIS1                | 4.70E-06   | -2.44881 |
| SKP2                  | 1.85E-07 | -3.16338 | CDON                  | 0.00045491 | -2.53339 | ANKRD36B             | 1.81E-07   | -2.44692 |
| ---                   | 0.00017  | -3.1595  | THSD4                 | 1.87E-08   | -2.52055 | ---                  | 4.17E-05   | -2.43827 |
| ---                   | 1.68E-05 | -3.15872 | MGC16121              | 0.00072663 | -2.51817 | CD44                 | 2.02E-08   | -2.4377  |
| CARD10                | 0.00022  | -3.15448 | IA4 /// UGT1A5 /// UC | 9.63E-06   | -2.5078  | SDK2                 | 0.00047264 | -2.42636 |
| MUC5B                 | 2.19E-05 | -3.1527  | THSD4                 | 1.58E-07   | -2.50548 | DKK1                 | 5.00E-08   | -2.42537 |
| ---                   | 6.92E-09 | -3.15192 | MPPED2                | 0.00043162 | -2.50094 | PRUNE                | 1.25E-06   | -2.42285 |
| PRTFDC1               | 1.35E-05 | -3.15174 | PLEKHA2               | 5.68E-06   | -2.49926 | AM91A2 /// FLJ3973   | 1.09E-08   | -2.42223 |
| NOTCH2                | 5.44E-08 | -3.13967 | ZNF652                | 0.00762344 | -2.49817 | WISP2                | 3.49E-05   | -2.41758 |
| BUB1B                 | 1.00E-09 | -3.13927 | CADM1                 | 1.23E-07   | -2.49236 | AHNAK2               | 0.0151736  | -2.4175  |
| ---                   | 6.01E-06 | -3.13739 | CD44                  | 5.76E-07   | -2.48513 | SYTL4                | 1.02E-06   | -2.41712 |
| ---                   | 2.13E-07 | -3.13464 | TMCC1                 | 3.81E-07   | -2.47437 | SEMA3C               | 6.47E-07   | -2.41534 |
| FAM26B                | 1.18E-08 | -3.13145 | DKK1                  | 4.21E-08   | -2.47356 | MGC16121             | 0.00020099 | -2.41433 |
| THBS1                 | 2.12E-08 | -3.12819 | FIGN                  | 1.89E-06   | -2.45951 | ---                  | 3.44E-05   | -2.41114 |
| SLC5A3                | 4.18E-08 | -3.12745 | KLF11                 | 1.80E-07   | -2.45643 | ---                  | 0.00306971 | -2.40953 |
| ---                   | 2.41E-06 | -3.12089 | KLF4                  | 5.42E-11   | -2.4557  | LOC150759            | 0.00014479 | -2.40496 |
| CAV1                  | 2.07E-05 | -3.11984 | PRUNE                 | 4.13E-07   | -2.44706 | AFAP1L2              | 4.86E-07   | -2.40046 |
| SPC25                 | 2.21E-06 | -3.11759 | ADCY1                 | 9.39E-08   | -2.44436 | ---                  | 0.0422365  | -2.38377 |
| CDC25C                | 6.99E-09 | -3.1113  | ---                   | 1.27E-08   | -2.44391 | ---                  | 1.67E-08   | -2.37768 |
| ABHD2                 | 6.13E-09 | -3.11008 | CD44                  | 6.97E-08   | -2.44036 | S100A10              | 4.79E-08   | -2.37743 |
| ACOT7                 | 1.71E-09 | -3.1098  | BCOR                  | 1.32E-06   | -2.43506 | CADM1                | 4.38E-06   | -2.37729 |
| SNHG9                 | 5.67E-07 | -3.10929 | LOC100129951          | 0.00035557 | -2.43465 | LOC81691             | 0.00035561 | -2.3742  |
| IFT52                 | 8.69E-10 | -3.10637 | TMCC1                 | 4.92E-07   | -2.43312 | MYBL1                | 3.20E-09   | -2.36721 |
| LOC100130886 /// TMEM | 8.28E-10 | -3.10558 | CAP2                  | 7.84E-08   | -2.43134 | CD44                 | 8.20E-06   | -2.35723 |
| GAS2L3                | 1.33E-06 | -3.10154 | G3BP1                 | 2.71E-07   | -2.4298  | ---                  | 1.39E-05   | -2.35693 |
| SLC25A1               | 2.46E-08 | -3.10008 | LPCAT1                | 8.27E-10   | -2.42917 | ZNF652               | 6.41E-09   | -2.35587 |
| DTL                   | 1.69E-07 | -3.09763 | EVL                   | 1.23E-09   | -2.42374 | SEMA6A               | 1.88E-07   | -2.35097 |
| FAM5C                 | 0.00041  | -3.09334 | MAF                   | 2.21E-05   | -2.414   | ---                  | 0.00034482 | -2.3499  |
| SYTL4                 | 1.51E-07 | -3.09078 | SYTL5                 | 4.34E-09   | -2.40872 | HNMT                 | 7.60E-05   | -2.34845 |
| AP1S1                 | 1.23E-07 | -3.0773  | WDR52                 | 0.00026181 | -2.40699 | ---                  | 1.74E-07   | -2.34814 |

|              |          |          |              |            |          |              |            |          |
|--------------|----------|----------|--------------|------------|----------|--------------|------------|----------|
| C8orf57      | 3.36E-06 | -3.07444 | ---          | 0.00063679 | -2.40434 | RAB31        | 1.64E-07   | -2.34502 |
| FAM26B       | 6.42E-09 | -3.07249 | SGK1         | 1.75E-09   | -2.40228 | MAF          | 2.86E-05   | -2.34128 |
| ---          | 8.79E-07 | -3.07217 | FLNB         | 6.73E-08   | -2.40065 | FIGN         | 2.95E-06   | -2.33633 |
| TMEM44       | 3.06E-08 | -3.07072 | ---          | 3.44E-07   | -2.39732 | CADM1        | 2.19E-07   | -2.33518 |
| ---          | 1.50E-05 | -3.06735 | FAM35A       | 3.71E-09   | -2.39414 | ---          | 2.34E-06   | -2.33193 |
| MDM1         | 7.46E-06 | -3.0646  | LOC150759    | 0.00015093 | -2.39236 | ---          | 0.00215466 | -2.33053 |
| MGC39900     | 1.60E-05 | -3.0642  | ---          | 0.00119814 | -2.38572 | LOC282997    | 0.00040444 | -2.32703 |
| CENPF        | 3.23E-07 | -3.06144 | LOC154761    | 8.06E-05   | -2.38196 | ADCY1        | 6.61E-08   | -2.32685 |
| POLA1        | 2.05E-06 | -3.05581 | CD44         | 4.27E-06   | -2.3796  | DCLK1        | 8.88E-05   | -2.32624 |
| TMEM107      | 3.44E-05 | -3.05327 | PRAGMIN      | 1.78E-05   | -2.37459 | ---          | 8.28E-07   | -2.32549 |
| ---          | 2.22E-08 | -3.05131 | FIGN         | 0.00281687 | -2.37338 | ---          | 0.00032268 | -2.32394 |
| ---          | 5.77E-08 | -3.05024 | SGPL1        | 1.16E-08   | -2.37221 | CD44         | 1.09E-07   | -2.32195 |
| BIRC5        | 4.35E-05 | -3.04904 | MXD1         | 5.41E-08   | -2.37218 | DSG2         | 4.58E-06   | -2.31805 |
| FAM46B       | 0.00065  | -3.04819 | ---          | 6.56E-06   | -2.37171 | ---          | 0.00021867 | -2.31358 |
| MKI67        | 1.02E-07 | -3.04294 | ---          | 1.50E-05   | -2.37157 | CD44         | 3.55E-07   | -2.30875 |
| ASPM         | 5.80E-08 | -3.04284 | ATXN1        | 1.88E-07   | -2.36943 | CDV3         | 1.21E-07   | -2.30796 |
| WDR76        | 4.34E-06 | -3.03951 | ---          | 1.26E-05   | -2.36894 | PRUNE        | 2.01E-08   | -2.30571 |
| KCNS3        | 1.53E-09 | -3.02448 | PAPSS2       | 3.95E-05   | -2.3674  | ---          | 3.46E-05   | -2.30536 |
| LOC100129673 | 4.71E-07 | -3.02282 | TMED8        | 6.51E-07   | -2.36698 | HSD17B10     | 7.05E-08   | -2.30415 |
| UNC119B      | 7.01E-08 | -3.01924 | S100A8       | 2.01E-07   | -2.36422 | HIPK1        | 0.00160317 | -2.30278 |
| FGFR4        | 0.00019  | -3.0176  | PMEPA1       | 1.09E-06   | -2.36393 | SLC39A8      | 1.42E-07   | -2.30275 |
| FANCI        | 1.81E-10 | -3.01018 | FOSL2        | 0.00211214 | -2.35958 | GRHL1        | 4.01E-07   | -2.30176 |
| CENPE        | 1.08E-08 | -3.00676 | GARNL1       | 2.65E-06   | -2.35884 | TMED8        | 8.77E-07   | -2.29103 |
| GTSE1        | 1.36E-06 | -3.00623 | PLEKHA2      | 5.15E-05   | -2.35063 | CDON         | 0.00095075 | -2.29086 |
| TSHZ1        | 4.23E-05 | -3.00493 | ---          | 0.00019325 | -2.34931 | ---          | 2.54E-05   | -2.28835 |
| ---          | 1.05E-05 | -3.00349 | KCNJ8        | 2.43E-06   | -2.34889 | TMED8        | 3.40E-09   | -2.28665 |
| LTBP1        | 2.70E-07 | -3.00236 | LOC100132798 | 1.91E-07   | -2.3456  | ---          | 1.46E-06   | -2.28649 |
| XPNPEP3      | 0.00011  | -3.00155 | WISP2        | 4.57E-05   | -2.34053 | VAV3         | 0.000212   | -2.28238 |
| C9orf152     | 5.59E-06 | -2.99864 | TFF3         | 3.25E-08   | -2.33928 | VAPB         | 8.27E-05   | -2.28164 |
| PTPRS        | 7.72E-07 | -2.99501 | TMED8        | 2.74E-09   | -2.33923 | TMCC1        | 8.91E-07   | -2.27799 |
| CLCC1        | 1.65E-06 | -2.99204 | PAPSS2       | 4.71E-09   | -2.33777 | BCOR         | 2.47E-06   | -2.27033 |
| SOX13        | 5.22E-05 | -2.99108 | C4orf30      | 8.68E-08   | -2.33421 | CAP2         | 3.36E-07   | -2.26877 |
| RAMP3        | 1.61E-05 | -2.9908  | G3BP1        | 3.17E-08   | -2.33238 | ZBED1        | 0.00019184 | -2.25812 |
| C20orf117    | 2.83E-05 | -2.98997 | SYTL4        | 0.00169172 | -2.33177 | SYK          | 4.22E-05   | -2.25657 |
| MKI67        | 2.77E-08 | -2.9875  | KIAA0114     | 2.05E-08   | -2.32895 | FOSL2        | 1.05E-07   | -2.2538  |
| DCLRE1B      | 6.47E-10 | -2.98681 | SDC2         | 3.44E-09   | -2.32674 | KLF11        | 4.10E-07   | -2.24381 |
| ---          | 1.09E-08 | -2.98306 | NOS1AP       | 0.00025666 | -2.32525 | TRIM45       | 0.00027747 | -2.24295 |
| KIF18A       | 6.50E-08 | -2.98219 | PKD2         | 2.75E-07   | -2.32273 | PRSS23       | 4.13E-08   | -2.23266 |
| GTSE1        | 1.53E-05 | -2.96846 | ATP13A2      | 3.18E-08   | -2.31877 | LOC100132999 | 2.05E-07   | -2.22961 |
| KIF2A        | 1.14E-08 | -2.96469 | SERPINA1     | 7.50E-08   | -2.31603 | C7orf41      | 5.85E-05   | -2.22171 |
| ABHD2        | 7.20E-09 | -2.96364 | ---          | 2.40E-05   | -2.31429 | NOS1AP       | 0.00037324 | -2.221   |
| CDC25A       | 8.83E-06 | -2.96336 | PRUNE        | 0.00019378 | -2.31316 | SLC39A8      | 2.53E-08   | -2.21914 |
| FAM111B      | 3.04E-07 | -2.95964 | ---          | 2.16E-08   | -2.31256 | PRAGMIN      | 3.26E-05   | -2.21747 |
| ---          | 0.00026  | -2.95785 | ---          | 0.00012635 | -2.30817 | ---          | 3.51E-05   | -2.21745 |
| KLHDC5       | 8.60E-09 | -2.95139 | IL1R1        | 0.00137498 | -2.30605 | FAM46B       | 0.00488989 | -2.21635 |
| SRGAP2       | 3.57E-08 | -2.94964 | SYCP2        | 1.01E-05   | -2.30095 | DSCAM        | 1.04E-06   | -2.21477 |
| SPA17        | 1.55E-06 | -2.94911 | THBD         | 0.00054538 | -2.3006  | ODC1         | 5.01E-09   | -2.2108  |
| NAGA         | 6.61E-07 | -2.94216 | VAV3         | 3.06E-05   | -2.29915 | HIPK2        | 6.62E-06   | -2.20761 |
| ESPL1        | 1.93E-08 | -2.93927 | FAM91A2      | 1.54E-07   | -2.29793 | G3BP1        | 5.51E-08   | -2.20188 |

|                   |          |          |                      |            |          |                      |            |          |
|-------------------|----------|----------|----------------------|------------|----------|----------------------|------------|----------|
| WHSC1             | 7.02E-06 | -2.9374  | NOS1AP               | 0.00011255 | -2.29653 | LBR                  | 5.22E-08   | -2.19889 |
| NRGN              | 8.02E-06 | -2.93598 | C9orf5               | 6.30E-09   | -2.29454 | TMCC1                | 9.22E-05   | -2.19818 |
| MAP2K6            | 1.90E-05 | -2.93166 | CADM1                | 6.01E-06   | -2.29429 | AGR2                 | 4.15E-10   | -2.19659 |
| KATNAL1           | 6.26E-05 | -2.92305 | NXPH3                | 0.00489436 | -2.2914  | LOC375295            | 0.00016011 | -2.19258 |
| KIF14             | 1.42E-08 | -2.92189 | KIAA0506             | 0.00016039 | -2.2841  | CYP1B1               | 1.14E-07   | -2.19214 |
| CHAF1A            | 8.75E-07 | -2.92156 | PCMTD1               | 3.85E-05   | -2.28385 | C1orf106             | 2.16E-05   | -2.19175 |
| RECQL4            | 5.68E-07 | -2.9203  | FAM91A2              | 1.14E-07   | -2.26932 | TMEM83               | 3.15E-07   | -2.18892 |
| NRNPA3P2 /// NDRC | 1.06E-07 | -2.91913 | FAM91A2 /// FLJ39738 | 2.00E-08   | -2.26903 | HTT                  | 5.29E-06   | -2.18872 |
| TTK               | 2.27E-08 | -2.91876 | SYK                  | 4.02E-05   | -2.26866 | CD47                 | 3.13E-05   | -2.18785 |
| CDT1              | 6.06E-09 | -2.91448 | ---                  | 0.00068849 | -2.26857 | RPL13                | 2.42E-07   | -2.18654 |
| GPD2              | 2.83E-08 | -2.9094  | DSCAM                | 8.42E-07   | -2.26521 | FIGN                 | 2.73E-06   | -2.18645 |
| SLC29A3           | 0.00018  | -2.9058  | KALRN                | 2.97E-07   | -2.25306 | C6orf26 /// MSH5     | 0.00018441 | -2.18597 |
| PPP2R1B           | 0.00022  | -2.90496 | MGC16121             | 0.00034999 | -2.25211 | FLNB                 | 1.64E-07   | -2.18485 |
| EXO1              | 9.91E-07 | -2.90437 | ---                  | 0.00048521 | -2.25091 | ASPM                 | 0.00079662 | -2.17886 |
| MAMLD1            | 0.00045  | -2.90329 | ---                  | 6.27E-05   | -2.24691 | GPR126               | 0.00017767 | -2.1775  |
| ---               | 2.10E-07 | -2.90187 | ---                  | 0.00044665 | -2.23607 | ---                  | 0.00137093 | -2.17414 |
| FANCI             | 1.91E-09 | -2.90143 | CAP2                 | 3.91E-07   | -2.23324 | 7A5                  | 0.00244338 | -2.1674  |
| TH1L              | 1.15E-10 | -2.89842 | CYP1B1               | 9.50E-08   | -2.23224 | KALRN                | 4.35E-07   | -2.1665  |
| WDHD1             | 4.51E-07 | -2.89747 | HIPK2                | 6.04E-06   | -2.22943 | TMCC1                | 1.36E-06   | -2.15572 |
| DEPDC1            | 6.84E-08 | -2.89738 | MLLT3                | 1.04E-05   | -2.22533 | PHLDA1               | 0.0005249  | -2.15556 |
| CAV2              | 3.34E-05 | -2.89311 | C6orf26 /// MSH5     | 0.00015858 | -2.22423 | SYTL5                | 1.26E-08   | -2.15552 |
| C1orf56           | 1.36E-06 | -2.89192 | AHNAK                | 2.75E-09   | -2.22277 | SAFB                 | 1.43E-07   | -2.14538 |
| AGR3              | 1.20E-07 | -2.88977 | FILIP1L              | 9.93E-05   | -2.21664 | CYP1B1               | 5.38E-07   | -2.14493 |
| CDCA7             | 1.02E-07 | -2.88958 | ---                  | 0.00047811 | -2.21366 | FANCA                | 0.00060818 | -2.1431  |
| SYCE2             | 5.10E-08 | -2.88929 | ---                  | 4.45E-06   | -2.21147 | C4orf19              | 6.30E-06   | -2.14227 |
| AP1S1             | 1.34E-07 | -2.88197 | ---                  | 0.00043045 | -2.21055 | ---                  | 3.77E-05   | -2.14156 |
| CAV1              | 6.46E-07 | -2.86866 | SULF1                | 3.79E-08   | -2.20849 | OLFML2A              | 0.00010158 | -2.13739 |
| ADAM2             | 5.59E-09 | -2.86748 | FREM2                | 2.53E-05   | -2.20765 | SDK1                 | 0.0004952  | -2.13701 |
| CAPS              | 4.59E-08 | -2.86188 | MCEE                 | 9.81E-08   | -2.20719 | ZNF496               | 0.00039565 | -2.13191 |
| GSN               | 0.00014  | -2.86136 | HECTD2               | 2.64E-06   | -2.20459 | NASP                 | 3.69E-08   | -2.13068 |
| C1orf96           | 2.91E-06 | -2.85852 | LOC81691             | 7.61E-05   | -2.19563 | GREB1                | 0.00046184 | -2.12763 |
| ---               | 1.11E-05 | -2.85826 | PRSS23               | 4.93E-08   | -2.19301 | KIAA0506             | 0.00029629 | -2.12708 |
| ABHD2             | 2.91E-06 | -2.85644 | 7A5                  | 0.00223656 | -2.193   | BCOR                 | 0.00023982 | -2.12549 |
| GINS3             | 9.94E-06 | -2.85617 | SLC25A37             | 1.17E-06   | -2.19101 | ---                  | 3.37E-05   | -2.1254  |
| RAB27A            | 2.55E-05 | -2.8517  | TIAM1                | 3.94E-06   | -2.18785 | TCF19                | 1.62E-05   | -2.12469 |
| SULF1             | 1.01E-06 | -2.85163 | ---                  | 0.00059396 | -2.18685 | 1 /// DDX12 /// LOC6 | 0.00030312 | -2.12385 |
| NASP              | 2.74E-06 | -2.85101 | S100A10              | 1.07E-07   | -2.18495 | TIAM1                | 5.47E-06   | -2.11599 |
| TIMELESS          | 1.04E-08 | -2.84728 | CTSD                 | 5.01E-08   | -2.18329 | ---                  | 6.76E-07   | -2.11341 |
| PIF1              | 7.02E-08 | -2.84632 | NEDD9                | 6.25E-08   | -2.18304 | KLF4                 | 2.34E-10   | -2.11233 |
| LTBP1             | 3.62E-08 | -2.84538 | THBD                 | 0.00095477 | -2.18297 | ---                  | 0.00027264 | -2.11201 |
| CDON              | 0.00021  | -2.84387 | SHISA2               | 6.88E-07   | -2.17558 | ---                  | 0.00016776 | -2.1104  |
| FLJ13236          | 1.22E-07 | -2.84302 | ASB13                | 6.28E-05   | -2.17549 | ---                  | 3.40E-05   | -2.10976 |
| CORO1C            | 5.98E-09 | -2.8416  | C9orf5               | 6.88E-10   | -2.17483 | NOS1AP               | 0.00023814 | -2.10786 |
| DCLK1             | 1.92E-05 | -2.84086 | OLFML2A              | 8.85E-05   | -2.16976 | VCAN                 | 0.00540994 | -2.10599 |
| MARCKS            | 8.17E-08 | -2.84069 | ---                  | 2.94E-05   | -2.16874 | ---                  | 2.78E-06   | -2.10359 |
| SULF1             | 4.32E-09 | -2.83828 | OSTM1                | 0.00010556 | -2.16865 | MXD1                 | 1.75E-07   | -2.10358 |
| LOC92497          | 8.50E-05 | -2.83821 | SULF2                | 7.17E-08   | -2.16755 | CD44                 | 1.37E-05   | -2.09974 |
| UHMK1             | 2.08E-05 | -2.83642 | OSTM1                | 0.00181916 | -2.16711 | PNMA2                | 3.92E-05   | -2.09674 |
| SERTAD4           | 1.93E-07 | -2.83624 | FGD3                 | 0.00459894 | -2.16474 | ---                  | 1.04E-05   | -2.09197 |

|                     |          |          |               |            |          |                       |            |          |
|---------------------|----------|----------|---------------|------------|----------|-----------------------|------------|----------|
| CENPN               | 2.55E-08 | -2.83497 | C4orf19       | 5.74E-06   | -2.16272 | NKAIN1                | 0.00105389 | -2.09037 |
| C6orf26 /// MSH5    | 2.42E-05 | -2.83287 | PCMTD1        | 1.18E-05   | -2.16252 | ZNF652                | 1.61E-08   | -2.08105 |
| ITGB3BP             | 3.13E-09 | -2.83202 | LOC100132999  | 2.79E-07   | -2.16193 | ---                   | 2.73E-06   | -2.07944 |
| MRE11A              | 7.89E-06 | -2.83164 | GSN           | 0.00107314 | -2.16192 | HIPK2                 | 0.00014458 | -2.07632 |
| UHMK1               | 9.76E-05 | -2.83039 | LYN           | 2.46E-05   | -2.16183 | TMCC1                 | 0.00015383 | -2.07553 |
| GEN1                | 1.30E-05 | -2.83033 | MEGF6         | 1.15E-05   | -2.15896 | THBS1                 | 0.00128973 | -2.0753  |
| ANKRD36B            | 4.81E-07 | -2.82973 | ---           | 0.00011982 | -2.15567 | ---                   | 5.46E-05   | -2.07172 |
| GPD2                | 0.00061  | -2.82699 | ---           | 2.53E-05   | -2.15202 | LOC154761             | 0.00027193 | -2.07057 |
| CDC20               | 6.20E-08 | -2.8267  | ---           | 0.00023124 | -2.15148 | FAM91A2               | 4.40E-07   | -2.0687  |
| ANGEL2              | 1.25E-07 | -2.82343 | ---           | 7.91E-06   | -2.14999 | VAV3                  | 4.49E-05   | -2.06796 |
| ABHD2               | 8.09E-08 | -2.82322 | ---           | 2.90E-05   | -2.14484 | OSTM1                 | 0.00269956 | -2.06126 |
| FANCD2              | 2.28E-08 | -2.82214 | SLC39A8       | 3.62E-08   | -2.14129 | EIF2S3                | 1.31E-05   | -2.05983 |
| COBL1               | 1.30E-07 | -2.82172 | ZNF652        | 1.22E-08   | -2.13664 | THSD4                 | 0.0060872  | -2.05983 |
| ACYPI1 /// C17orf13 | 1.70E-06 | -2.81553 | LOC81691      | 0.00083468 | -2.13474 | C6orf26 /// MSH5      | 5.41E-06   | -2.05899 |
| DSCC1               | 2.22E-07 | -2.81227 | FLNB          | 1.84E-08   | -2.13395 | ---                   | 1.44E-06   | -2.05801 |
| ---                 | 7.15E-05 | -2.81161 | GSN           | 1.77E-08   | -2.12943 | PRUNE                 | 0.00053453 | -2.05543 |
| ---                 | 6.07E-06 | -2.81125 | SOX13         | 0.00067029 | -2.12495 | KCNJ8                 | 8.82E-06   | -2.05398 |
| SERBP1              | 7.51E-08 | -2.81047 | ---           | 8.57E-06   | -2.12426 | EIF2S3                | 2.12E-08   | -2.05044 |
| ---                 | 2.28E-05 | -2.80753 | HIPK2         | 0.00011733 | -2.12311 | GPR158                | 0.00904355 | -2.05041 |
| ZNF738              | 0.00019  | -2.80271 | ATXN1         | 8.07E-08   | -2.12143 | HIST1H4H /// HIST1H4A | 7.36E-07   | -2.0496  |
| FAM46C              | 6.26E-08 | -2.80139 | ---           | 0.00429288 | -2.11728 | STARD4                | 0.00097225 | -2.04951 |
| KCNK2               | 2.05E-07 | -2.80072 | EIF2S3        | 1.05E-06   | -2.11565 | ---                   | 3.47E-07   | -2.04795 |
| LAMP2               | 8.93E-06 | -2.79808 | LMBR1         | 4.25E-08   | -2.1096  | DKFZP434B2016         | 9.83E-06   | -2.04565 |
| MGC3260             | 9.77E-09 | -2.79428 | CDKN1B        | 4.17E-07   | -2.10954 | FOSL2                 | 0.00592988 | -2.04373 |
| KIF2C               | 1.23E-08 | -2.79116 | ---           | 2.36E-06   | -2.10922 | ---                   | 9.00E-07   | -2.04134 |
| MLF1IP              | 6.44E-08 | -2.78909 | C5orf21       | 1.24E-06   | -2.10779 | OVOL2                 | 0.00016498 | -2.04093 |
| PASK                | 1.46E-07 | -2.7873  | ---           | 0.00068436 | -2.10693 | ---                   | 2.73E-05   | -2.03849 |
| MTX1                | 4.19E-07 | -2.78646 | CYP1B1        | 6.52E-07   | -2.10515 | PRUNE                 | 2.47E-06   | -2.03199 |
| NRNPA3P2 /// NDRC1  | 1.04E-07 | -2.78309 | SDK2          | 0.00143073 | -2.10504 | MGC39900 /// TMSL8    | 2.20E-06   | -2.03183 |
| ---                 | 1.85E-08 | -2.78259 | VCAN          | 0.00545311 | -2.10368 | CDKN1B                | 6.36E-07   | -2.02745 |
| DLG7                | 2.69E-10 | -2.77643 | CDV3          | 3.03E-07   | -2.10298 | SULF1                 | 9.34E-08   | -2.02644 |
| C9orf103            | 4.18E-06 | -2.77545 | TRIM45        | 0.00048441 | -2.10182 | ---                   | 3.38E-07   | -2.02229 |
| NEK2                | 2.54E-09 | -2.77088 | PCDHGA4       | 9.35E-06   | -2.10101 | SBK1                  | 1.97E-07   | -2.0196  |
| ARMC9               | 0.00399  | -2.76836 | ODC1          | 8.57E-09   | -2.09871 | KIF14                 | 3.90E-07   | -2.0186  |
| PRODH               | 1.64E-05 | -2.76607 | RAB31         | 3.46E-08   | -2.09803 | RMST                  | 0.0602858  | -2.01726 |
| PASK                | 1.14E-06 | -2.76446 | ---           | 5.35E-06   | -2.09726 | DEPDC1                | 6.85E-06   | -2.01579 |
| ---                 | 2.12E-07 | -2.76344 | ---           | 2.96E-07   | -2.09501 | THBD                  | 0.00163015 | -2.01367 |
| PLK4                | 3.28E-09 | -2.76329 | SDK1          | 0.00059448 | -2.09256 | ---                   | 0.00499299 | -2.00986 |
| ANKRD36B            | 6.73E-08 | -2.76091 | CDCA7L        | 8.57E-08   | -2.09148 | PCDHGA4               | 1.48E-05   | -2.00905 |
| TMEM77              | 0.0004   | -2.75942 | LOC282997     | 0.00096851 | -2.09105 | HYOU1                 | 1.71E-08   | -2.00693 |
| ---                 | 8.45E-07 | -2.759   | PTGES         | 1.51E-05   | -2.0905  | FAM91A2               | 4.03E-07   | -2.00682 |
| UHRF1               | 1.76E-08 | -2.75717 | CA8           | 1.79E-06   | -2.08942 | KIAA0114              | 9.55E-08   | -2.00348 |
| CKAP2L              | 2.35E-06 | -2.75507 | DSCAM         | 1.86E-08   | -2.08797 | SLC35A4               | 2.13E-07   | -2.00144 |
| RNF38               | 1.29E-08 | -2.75468 | ---           | 0.00209611 | -2.08474 | GAS2L3                | 5.09E-05   | -2.00139 |
| MGC39900 /// TMSL8  | 0.00038  | -2.75286 | MAPT          | 0.00026273 | -2.08388 | BNIP1                 | 0.00164541 | -2.00083 |
| MAN1A1              | 1.60E-06 | -2.75123 | LYN           | 2.77E-05   | -2.0832  | ABCG2                 | 1.66E-05   | -2.00004 |
| ---                 | 8.69E-05 | -2.74981 | WDR68         | 6.11E-05   | -2.08116 | ATP13A2               | 1.45E-07   | -1.99961 |
| C1orf106            | 3.27E-06 | -2.7478  | FER1L3        | 6.71E-09   | -2.07529 | ---                   | 0.00071886 | -1.9992  |
| RFC5                | 2.56E-10 | -2.74602 | DKFZP434B2016 | 8.48E-06   | -2.07515 | SEMA6A                | 0.00167753 | -1.99426 |

|                   |          |          |                    |            |          |                       |            |          |
|-------------------|----------|----------|--------------------|------------|----------|-----------------------|------------|----------|
| FGFR4             | 0.00015  | -2.74601 | ---                | 0.00051561 | -2.07359 | ---                   | 2.03E-08   | -1.99418 |
| FAIM              | 1.54E-05 | -2.74594 | SLC39A8            | 4.10E-07   | -2.0707  | NXPH3                 | 0.00064933 | -1.99146 |
| RCAN3             | 8.98E-09 | -2.74481 | PPIF               | 7.68E-09   | -2.0701  | GRB10                 | 0.00624646 | -1.99132 |
| NXT2              | 2.32E-06 | -2.74305 | KCNJ8              | 1.20E-05   | -2.06851 | ---                   | 0.0464399  | -1.99076 |
| ---               | 2.94E-06 | -2.74295 | ---                | 0.00045766 | -2.06803 | WHSC1                 | 0.00017981 | -1.98848 |
| RGS22             | 7.04E-08 | -2.74003 | BNIPL              | 0.00125675 | -2.06442 | DEPDC1                | 1.92E-06   | -1.98838 |
| PGM2              | 6.31E-09 | -2.73824 | JAK2               | 0.00045316 | -2.06325 | ---                   | 9.48E-06   | -1.98621 |
| FAM72B /// FAM72I | 5.82E-08 | -2.7377  | RAB31              | 6.52E-09   | -2.06141 | PTGES                 | 2.62E-05   | -1.98244 |
| C12orf48          | 2.70E-07 | -2.73545 | C1orf106           | 3.91E-05   | -2.0612  | LOC442075             | 8.26E-06   | -1.98037 |
| C20orf117         | 5.86E-06 | -2.73386 | ABHD2              | 4.75E-05   | -2.05421 | MAPT                  | 0.00042583 | -1.97978 |
| TWSG1             | 3.52E-07 | -2.73319 | ---                | 0.0393927  | -2.05315 | ---                   | 6.16E-08   | -1.97667 |
| RAD54L            | 5.62E-07 | -2.73195 | LMBR1              | 3.70E-07   | -2.04438 | FRMD4A                | 4.39E-06   | -1.97447 |
| HIRIP3            | 4.02E-07 | -2.72989 | ---                | 1.57E-06   | -2.04233 | DSCAM                 | 3.47E-08   | -1.9743  |
| TH1L              | 1.32E-10 | -2.7293  | FBXL17             | 0.00360663 | -2.03996 | CD44                  | 5.36E-06   | -1.97308 |
| TH1L              | 3.03E-09 | -2.72766 | LOC143381          | 9.88E-09   | -2.03923 | SRRM2                 | 0.00022617 | -1.9695  |
| APOBEC3B          | 9.96E-07 | -2.72761 | ---                | 2.79E-06   | -2.03894 | MKI67                 | 3.40E-08   | -1.96943 |
| WDHD1             | 1.34E-06 | -2.72662 | HIPK1              | 0.00403515 | -2.03758 | LOC401320             | 0.00031871 | -1.96765 |
| KIF11             | 9.72E-08 | -2.72591 | SSR3               | 2.08E-09   | -2.03571 | FOSL2                 | 7.31E-10   | -1.96195 |
| TMCC1             | 1.60E-05 | -2.72316 | MXD1               | 2.76E-05   | -2.03207 | CASC5                 | 9.58E-06   | -1.96134 |
| MCM10             | 2.50E-10 | -2.72265 | SERPINA1           | 6.82E-07   | -2.02885 | POLQ                  | 0.0001804  | -1.96093 |
| CXCL12            | 6.66E-10 | -2.7226  | KLK11              | 2.38E-07   | -2.02843 | NXPH3                 | 0.0141742  | -1.95995 |
| VAMP4             | 4.96E-06 | -2.71552 | LOC649305          | 1.02E-06   | -2.02828 | C14orf147             | 7.74E-08   | -1.95956 |
| INPP5F            | 5.16E-05 | -2.71486 | C6orf26 /// MSH5   | 6.37E-06   | -2.02731 | LOC143381             | 1.56E-08   | -1.95907 |
| FIGNL1            | 1.39E-08 | -2.7146  | VAPB               | 0.00024369 | -2.02528 | KIAA1908              | 7.57E-05   | -1.95765 |
| PROS1             | 2.93E-07 | -2.71429 | ---                | 7.66E-06   | -2.02307 | ---                   | 1.75E-06   | -1.95408 |
| MCM5              | 9.07E-08 | -2.71357 | METTL7A            | 0.00022032 | -2.02168 | CDCA7L                | 1.83E-07   | -1.95366 |
| RAD51             | 1.50E-06 | -2.70683 | NXPH3              | 0.0005814  | -2.01526 | DPY19L3               | 2.54E-05   | -1.95325 |
| IPP               | 9.84E-05 | -2.7064  | HYOU1              | 1.66E-08   | -2.01245 | SULF2                 | 2.22E-07   | -1.95274 |
| BRCA1             | 8.22E-06 | -2.70574 | THBS1              | 0.00168695 | -2.01102 | LOC649305             | 1.57E-06   | -1.952   |
| RPL28             | 2.59E-06 | -2.7054  | BCOR               | 0.00040226 | -2.00968 | MCM3APAS              | 0.0001233  | -1.95193 |
| ORC1L             | 4.78E-05 | -2.7044  | SLC16A6            | 1.72E-05   | -2.00935 | GP1BB /// SEPT5       | 0.00012742 | -1.95177 |
| UST               | 2.42E-05 | -2.70087 | CDK6               | 2.69E-06   | -2.00611 | CDV3                  | 1.16E-08   | -1.95031 |
| TYMS              | 2.46E-09 | -2.70064 | PBX3               | 8.30E-07   | -2.00568 | WDR68                 | 0.00011834 | -1.9492  |
| LEPR              | 0.00173  | -2.69627 | ---                | 0.00085558 | -2.00499 | RAI14                 | 1.52E-06   | -1.9466  |
| TH1L              | 3.03E-10 | -2.69528 | ABLIM1             | 3.41E-05   | -2.00223 | SLITRK4               | 0.00043783 | -1.94562 |
| F8                | 3.00E-05 | -2.69408 | PCDHB14            | 8.47E-05   | -2.00035 | CBX5                  | 4.42E-07   | -1.94218 |
| ---               | 0.0001   | -2.69401 | OVOL2              | 0.00020323 | -1.99779 | ---                   | 0.00029729 | -1.94129 |
| CASC5             | 1.21E-08 | -2.69254 | ---                | 8.69E-07   | -1.99536 | TFAP2A                | 1.09E-06   | -1.93486 |
| FAM64A            | 8.87E-09 | -2.69174 | ---                | 8.30E-08   | -1.99508 | ---                   | 3.64E-06   | -1.93318 |
| SYT1              | 2.00E-07 | -2.69086 | GALNT3             | 1.23E-07   | -1.9944  | HIST1H4H /// HIST1H4A | 1.64E-06   | -1.9331  |
| PCDH7             | 4.18E-05 | -2.68803 | UTRN               | 0.0041113  | -1.99409 | /// LOC728715 /// O   | 0.00050355 | -1.93309 |
| LOC100129951      | 0.00018  | -2.68443 | CAPN2              | 4.41E-08   | -1.99284 | CCDC85A               | 0.0002867  | -1.93175 |
| CCNB1             | 3.88E-08 | -2.68027 | C9orf5             | 8.43E-11   | -1.99213 | ASPM                  | 0.00068016 | -1.93145 |
| NCAPD3            | 4.36E-08 | -2.67731 | ---                | 0.00835828 | -1.99123 | JAK1                  | 0.00011784 | -1.9289  |
| ---               | 1.52E-06 | -2.67464 | ---                | 0.00407638 | -1.99054 | GARNL1                | 1.97E-05   | -1.92802 |
| NRM               | 1.61E-09 | -2.67434 | MGC39900 /// TMSL8 | 2.76E-06   | -1.99029 | UGT1A4 /// UGT1A3     | 3.88E-07   | -1.92797 |
| CEP152            | 0.00014  | -2.67426 | ---                | 3.12E-05   | -1.98977 | ---                   | 1.26E-05   | -1.92766 |
| ESPL1             | 2.44E-09 | -2.67327 | SULF1              | 9.25E-06   | -1.98784 | EPPK1                 | 0.0003315  | -1.92592 |
| ATRNL1            | 8.48E-07 | -2.66666 | PIK3R1             | 6.56E-07   | -1.98756 | C4orf30               | 6.57E-07   | -1.92215 |



|                     |          |          |                       |            |          |              |            |          |
|---------------------|----------|----------|-----------------------|------------|----------|--------------|------------|----------|
| PLK1                | 9.13E-09 | -2.66432 | ARNT                  | 2.70E-05   | -1.98747 | JAK2         | 0.00088766 | -1.92045 |
| ---                 | 0.00021  | -2.66351 | ABHD2                 | 3.16E-07   | -1.98696 | SULF1        | 1.36E-05   | -1.91963 |
| GNA12               | 5.21E-06 | -2.66308 | 1A4 /// UGT1A5 /// UC | 3.43E-05   | -1.98331 | MCEE         | 4.48E-07   | -1.91826 |
| BRIP1               | 3.33E-06 | -2.6613  | PAM                   | 3.49E-08   | -1.98312 | ---          | 0.00187763 | -1.91667 |
| TMEM107             | 2.23E-06 | -2.65876 | ZNF703                | 3.55E-05   | -1.98193 | CYP1B1       | 0.00016551 | -1.91555 |
| NELL2               | 4.07E-09 | -2.65783 | CYP1B1                | 1.33E-05   | -1.98137 | JAK1         | 0.00197921 | -1.91277 |
| PLAGL2              | 3.09E-07 | -2.65665 | MYBL1                 | 1.99E-08   | -1.9812  | FREM2        | 0.00010652 | -1.91134 |
| MND1                | 3.79E-07 | -2.65521 | GRHL1                 | 1.86E-06   | -1.97961 | LOC91431     | 0.00054176 | -1.91088 |
| ---                 | 1.63E-05 | -2.65182 | COL18A1               | 6.30E-05   | -1.97827 | LMBR1        | 7.98E-07   | -1.9107  |
| TWF1                | 0.00421  | -2.65022 | ---                   | 5.11E-07   | -1.97745 | UHMK1        | 0.00215326 | -1.91032 |
| NOTCH2              | 3.46E-08 | -2.64565 | RAB31                 | 9.30E-07   | -1.97689 | KIF14        | 0.00018573 | -1.909   |
| ---                 | 5.69E-08 | -2.64512 | PQLC3                 | 1.06E-08   | -1.97409 | FKBP5        | 1.85E-06   | -1.90687 |
| MCM5                | 3.99E-09 | -2.64196 | SMARCA2               | 0.00021479 | -1.97325 | SLC19A2      | 0.00020977 | -1.90658 |
| SHANK2              | 4.87E-07 | -2.64194 | SVIL                  | 2.95E-05   | -1.97291 | NEDD9        | 2.78E-07   | -1.90587 |
| ANLN                | 3.14E-06 | -2.64063 | FAM110B               | 0.00768212 | -1.97282 | ---          | 0.00058693 | -1.90556 |
| CXorf10             | 8.26E-05 | -2.64049 | HIST1H4H /// HIST1H   | 1.31E-06   | -1.97123 | ---          | 8.55E-07   | -1.9053  |
| TIGD7               | 1.04E-06 | -2.6397  | ---                   | 0.00010559 | -1.96989 | DST          | 0.00064303 | -1.90486 |
| DEPDC1              | 9.37E-09 | -2.63966 | SEMA3C                | 6.00E-06   | -1.96691 | QSER1        | 0.0011448  | -1.90444 |
| ZNF346              | 7.65E-06 | -2.63946 | SVIL                  | 3.64E-06   | -1.96675 | TNK2         | 1.36E-05   | -1.90369 |
| OSTF1               | 7.02E-07 | -2.63802 | RMST                  | 0.0683143  | -1.96595 | RAD51L1      | 0.00018663 | -1.89935 |
| RBL1                | 1.24E-06 | -2.63323 | TMEM167               | 1.11E-06   | -1.96233 | ARSG         | 0.00021268 | -1.89855 |
| ---                 | 4.68E-05 | -2.63305 | ---                   | 0.0008357  | -1.96223 | SGPL1        | 2.72E-08   | -1.89849 |
| ---                 | 3.56E-05 | -2.63184 | AGR2                  | 1.42E-09   | -1.96183 | LOC100128918 | 0.00015706 | -1.89832 |
| RNFT2               | 4.12E-07 | -2.63031 | GRHL1                 | 0.00043324 | -1.96054 | GARNL1       | 2.53E-05   | -1.89654 |
| C5                  | 9.92E-05 | -2.62788 | FOSL2                 | 1.09E-07   | -1.96033 | LMBR1        | 1.43E-07   | -1.89548 |
| EPB41L1             | 1.23E-06 | -2.62721 | ---                   | 1.49E-06   | -1.96022 | AHNAK        | 1.60E-08   | -1.89456 |
| LRRRC8B             | 1.22E-07 | -2.62719 | PCDHB10               | 0.00180561 | -1.9596  | SYNE2        | 1.04E-05   | -1.89422 |
| ---                 | 2.97E-07 | -2.62345 | ROD1                  | 6.20E-09   | -1.95794 | THBD         | 0.00323219 | -1.89105 |
| CDCA8               | 1.83E-07 | -2.62099 | RDH5                  | 3.07E-06   | -1.95776 | ---          | 0.00091717 | -1.89074 |
| RBM3                | 0.00019  | -2.61756 | LOC402778             | 3.07E-06   | -1.95761 | ATXN1        | 1.97E-06   | -1.88963 |
| ---                 | 8.19E-05 | -2.61301 | LOC727738             | 0.0212384  | -1.95744 | CADM1        | 1.06E-05   | -1.88938 |
| ---                 | 3.20E-05 | -2.61279 | TET2                  | 5.38E-05   | -1.95721 | CDCA7        | 5.25E-06   | -1.88877 |
| TMEM19              | 2.01E-05 | -2.60816 | FANCA                 | 0.00135543 | -1.95671 | PIIF         | 2.25E-08   | -1.88709 |
| E2F7                | 3.21E-07 | -2.6053  | POLR2J4               | 9.37E-06   | -1.95466 | FLNB         | 7.52E-08   | -1.88485 |
| CDKN2C              | 1.76E-06 | -2.60247 | UTRN                  | 1.53E-06   | -1.95429 | PBX3         | 1.70E-06   | -1.88477 |
| TAF5                | 1.25E-06 | -2.60222 | ABHD2                 | 3.21E-07   | -1.95334 | CTPS2        | 1.77E-07   | -1.88393 |
| FLJ25076            | 9.19E-08 | -2.60213 | LOC442075             | 9.68E-06   | -1.9521  | SIPA1L1      | 0.00012657 | -1.88221 |
| METTL7B             | 3.89E-05 | -2.60078 | ---                   | 5.04E-07   | -1.952   | ZNRF1        | 0.00010997 | -1.88214 |
| GLUD2               | 7.95E-05 | -2.59807 | HIPK2                 | 1.89E-06   | -1.9491  | ---          | 0.00154721 | -1.88193 |
| C100132733 /// LOC2 | 1.37E-06 | -2.59791 | ---                   | 8.08E-08   | -1.94516 | UGT2B17      | 0.00559746 | -1.88154 |
| RET                 | 9.93E-08 | -2.59679 | ---                   | 0.00050289 | -1.94338 | FERMT2       | 5.68E-09   | -1.88065 |
| C9orf100            | 3.32E-06 | -2.59593 | HIPK2                 | 0.00040751 | -1.94126 | SYCP2        | 7.62E-05   | -1.88034 |
| CDK2                | 1.10E-06 | -2.59155 | LOC644192             | 1.08E-05   | -1.9392  | SKP1         | 3.65E-07   | -1.87875 |
| MPHOSPH9            | 7.13E-08 | -2.59013 | ZBED1                 | 0.00076301 | -1.9372  | GNL3L        | 1.71E-06   | -1.87847 |
| AP1S1               | 3.15E-06 | -2.58979 | LOC401320             | 0.00037433 | -1.93614 | SIDT1        | 2.69E-06   | -1.87825 |
| ---                 | 4.87E-12 | -2.58909 | ---                   | 7.86E-08   | -1.93593 | SLC38A1      | 4.73E-06   | -1.87759 |
| MARCKS              | 0.00015  | -2.58904 | SERTAD4               | 6.40E-06   | -1.93538 | COX15        | 1.32E-05   | -1.8768  |
| ---                 | 0.0008   | -2.58784 | RBM9                  | 0.00021653 | -1.93402 | MAP3K1       | 0.00901682 | -1.87505 |
| ---                 | 0.0003   | -2.58446 | C17orf63              | 0.00510011 | -1.93375 | ---          | 0.00055213 | -1.8748  |

|                     |          |          |                        |            |          |           |            |          |
|---------------------|----------|----------|------------------------|------------|----------|-----------|------------|----------|
| MKI67               | 2.37E-09 | -2.58435 | AMZ1                   | 3.70E-05   | -1.93333 | EPPK1     | 6.65E-05   | -1.87349 |
| NDC80               | 2.17E-07 | -2.58364 | ---                    | 0.00088298 | -1.9304  | NRCAM     | 3.90E-05   | -1.87335 |
| NXPH3               | 0.00228  | -2.58278 | TMEM83                 | 1.22E-06   | -1.93025 | LOC727738 | 0.0283657  | -1.87308 |
| /// NBPF15 /// NBPF | 1.27E-05 | -2.58053 | ---                    | 0.00262265 | -1.92939 | METTL3    | 6.54E-05   | -1.87167 |
| BUB1                | 9.05E-06 | -2.57934 | ZNF496                 | 0.0009863  | -1.92915 | ---       | 0.00282447 | -1.87131 |
| EBPL                | 2.56E-08 | -2.57862 | ZNRF1                  | 8.55E-05   | -1.92615 | ZNF789    | 4.50E-06   | -1.87089 |
| SEMA6A              | 0.00022  | -2.57754 | SMARCA2                | 5.97E-05   | -1.92597 | GOLGA1    | 1.56E-05   | -1.86995 |
| SLC24A1             | 2.47E-05 | -2.57375 | COX15                  | 9.77E-06   | -1.9258  | ---       | 2.60E-05   | -1.86992 |
| ---                 | 8.55E-07 | -2.57344 | DSCAM                  | 1.16E-07   | -1.9258  | DSCAM     | 1.72E-07   | -1.86552 |
| CRTAP               | 2.63E-07 | -2.57287 | 1 /// LOC728715 /// OV | 0.00052877 | -1.92361 | ---       | 0.00536055 | -1.86355 |
| ---                 | 1.99E-05 | -2.57144 | ---                    | 2.35E-05   | -1.92296 | ---       | 0.00122298 | -1.86288 |
| TIMM50              | 2.83E-05 | -2.56901 | GLCC11                 | 0.00014547 | -1.92231 | SLC25A37  | 6.83E-06   | -1.8624  |
| DNA2                | 6.80E-08 | -2.56841 | ZNF789                 | 3.29E-06   | -1.9213  | HIPK1     | 0.00035131 | -1.86198 |
| PTGER3              | 0.00573  | -2.56836 | 11 /// DDX12 /// LOC6  | 0.00077657 | -1.9201  | ---       | 1.36E-05   | -1.86193 |
| KIF2C               | 4.43E-08 | -2.56784 | HTT                    | 2.07E-05   | -1.91928 | CDC25C    | 7.82E-07   | -1.86097 |
| PHF19               | 9.02E-07 | -2.56781 | NBL1                   | 6.04E-07   | -1.91881 | ADCY1     | 1.59E-06   | -1.85961 |
| ---                 | 0.00016  | -2.56776 | AFAP1L2                | 4.68E-06   | -1.91779 | CTSD      | 3.06E-07   | -1.85779 |
| ---                 | 1.03E-06 | -2.56753 | CTSD                   | 5.67E-07   | -1.91662 | MKNK1     | 0.00833384 | -1.85596 |
| ---                 | 0.00023  | -2.56669 | ---                    | 3.81E-05   | -1.91577 | KIF15     | 0.00062001 | -1.85447 |
| DEPDC1              | 1.68E-07 | -2.56615 | ---                    | 2.24E-06   | -1.9124  | SLITRK6   | 7.72E-07   | -1.85094 |
| HOOK1               | 2.05E-10 | -2.56365 | SSR3                   | 3.55E-07   | -1.91214 | TFPI2     | 0.0104641  | -1.85045 |
| FANCA               | 0.00015  | -2.56305 | RASGRP1                | 0.00559456 | -1.91051 | CYP1B1    | 2.88E-05   | -1.84999 |
| KIF2A               | 6.50E-06 | -2.56281 | C20orf142              | 1.28E-05   | -1.90966 | TFAP2A    | 4.43E-05   | -1.8495  |
| FGFR3               | 1.06E-07 | -2.5625  | PIK3R1                 | 2.81E-06   | -1.9088  | SMARCA2   | 0.00042054 | -1.84947 |
| CDCA5               | 1.66E-11 | -2.56212 | TSPAN15                | 2.51E-06   | -1.90812 | PCDHB14   | 0.00019503 | -1.84947 |
| IAA0746 /// SERINC  | 1.66E-06 | -2.56063 | FAM46B                 | 0.0142468  | -1.90614 | EPHA4     | 2.20E-06   | -1.84877 |
| SLC35D1             | 3.40E-05 | -2.55988 | JAK2                   | 0.00050084 | -1.9058  | RDH5      | 6.04E-06   | -1.84822 |
| PTPLAD1             | 1.31E-09 | -2.55909 | CD44                   | 0.00579679 | -1.90362 | ZNF84     | 7.16E-06   | -1.8463  |
| NUF2                | 1.35E-06 | -2.55817 | SULF1                  | 3.92E-05   | -1.90139 | DSG2      | 2.10E-07   | -1.8449  |
| LOC145842           | 0.00013  | -2.5573  | ---                    | 3.57E-08   | -1.90088 | ---       | 0.00012535 | -1.84479 |
| EML3                | 1.03E-06 | -2.55721 | ---                    | 3.29E-06   | -1.90072 | FKBP5     | 5.61E-07   | -1.84414 |
| SULF1               | 8.74E-07 | -2.55407 | ---                    | 0.00399991 | -1.90062 | KCNJ8     | 4.28E-05   | -1.84184 |
| ---                 | 2.74E-05 | -2.54973 | AHNAK2                 | 1.41E-05   | -1.89982 | LOC402778 | 6.29E-06   | -1.84159 |
| CHEK1               | 7.25E-06 | -2.54838 | COL4A6                 | 0.0117989  | -1.8994  | BCL2      | 0.00264543 | -1.84036 |
| C20orf160           | 8.58E-05 | -2.54759 | IGSF3                  | 2.47E-08   | -1.89872 | PPIF      | 9.04E-09   | -1.83978 |
| RBBP9               | 0.00023  | -2.54643 | CADM1                  | 1.01E-05   | -1.89807 | NOLC1     | 1.40E-05   | -1.83975 |
| TYMK /// LOC72776   | 2.42E-08 | -2.54564 | ---                    | 5.02E-06   | -1.89595 | ---       | 7.53E-05   | -1.83786 |
| ---                 | 8.38E-05 | -2.54424 | HIST1H4H /// HIST1H    | 1.83E-06   | -1.89171 | PODXL     | 6.08E-08   | -1.83698 |
| LOC143381           | 1.30E-10 | -2.54253 | ---                    | 0.00091747 | -1.89068 | COX15     | 0.00054026 | -1.83434 |
| AGR2                | 1.05E-07 | -2.53847 | HIPK1                  | 4.77E-07   | -1.89022 | LOC644192 | 2.07E-05   | -1.83422 |
| MYEF2               | 2.37E-06 | -2.53759 | KIAA1908               | 0.00011107 | -1.88921 | SLITRK6   | 1.57E-07   | -1.83211 |
| ---                 | 0.00026  | -2.53603 | PRICKLE2               | 5.02E-06   | -1.88849 | FGD3      | 0.0158236  | -1.83174 |
| ---                 | 2.04E-06 | -2.53446 | ---                    | 6.91E-05   | -1.88768 | ---       | 0.00017197 | -1.83007 |
| ---                 | 1.53E-06 | -2.53374 | DICER1                 | 1.81E-05   | -1.88726 | MKI67     | 1.12E-05   | -1.82759 |
| RAB3IP              | 0.00088  | -2.52957 | ---                    | 2.20E-06   | -1.88726 | ---       | 0.0015043  | -1.82612 |
| RABL2A /// RABL2B   | 1.91E-06 | -2.5292  | ---                    | 4.83E-06   | -1.88671 | NBL1      | 1.11E-06   | -1.8257  |
| CD109               | 3.02E-06 | -2.52886 | UGT2B17                | 0.00550273 | -1.88533 | FAM111B   | 2.69E-05   | -1.82235 |
| CENPJ               | 2.07E-06 | -2.5279  | DSG2                   | 3.77E-05   | -1.88179 | LOC150051 | 0.00391866 | -1.82053 |
| PCDHGA4             | 1.75E-06 | -2.52648 | PPIF                   | 6.82E-09   | -1.881   | LGALS1    | 4.21E-07   | -1.8205  |

|              |          |          |                    |            |          |              |            |          |
|--------------|----------|----------|--------------------|------------|----------|--------------|------------|----------|
| FCHSD2       | 2.09E-05 | -2.52494 | ---                | 0.00016785 | -1.87941 | ---          | 4.60E-05   | -1.8205  |
| ---          | 4.58E-08 | -2.52151 | CCDC18             | 0.00177061 | -1.87929 | ---          | 0.0264985  | -1.8203  |
| XRCC3        | 2.02E-06 | -2.52069 | BCL2               | 0.00219344 | -1.87723 | ---          | 0.0316093  | -1.81959 |
| UGT2B17      | 0.00058  | -2.51999 | ACVR2B             | 3.97E-05   | -1.87645 | ZBTB5        | 1.91E-07   | -1.8168  |
| PCDHB14      | 1.05E-05 | -2.51934 | SLITRK6            | 1.17E-07   | -1.87488 | ---          | 0.0100728  | -1.81284 |
| PCDHB16      | 1.16E-05 | -2.51878 | PAM                | 3.64E-06   | -1.87399 | E2F2         | 0.0003351  | -1.81189 |
| LOC440995    | 3.18E-05 | -2.5187  | ---                | 0.00013214 | -1.87356 | SHISA2       | 5.37E-06   | -1.81073 |
| NCAPG        | 5.57E-07 | -2.51849 | SSR3               | 1.83E-05   | -1.87193 | LOC100132181 | 1.17E-05   | -1.80949 |
| CNPY3        | 0.00149  | -2.51723 | ---                | 0.00117827 | -1.86989 | ---          | 0.00136726 | -1.8087  |
| ---          | 2.84E-06 | -2.51576 | LBR                | 3.18E-07   | -1.86858 | IGSF3        | 4.60E-08   | -1.80859 |
| PPM1F        | 0.00025  | -2.5145  | ---                | 7.03E-05   | -1.86484 | KLHDC4       | 0.00057186 | -1.80855 |
| ZNF592       | 2.32E-05 | -2.51289 | PRPS1              | 6.09E-07   | -1.86102 | PRSS23       | 0.0133258  | -1.80854 |
| KIF18B       | 1.93E-08 | -2.51224 | TCF3               | 0.00094345 | -1.86059 | PCDHB10      | 0.00380565 | -1.80699 |
| PRIMA1       | 2.40E-05 | -2.51146 | ---                | 0.00027172 | -1.86009 | ZAK          | 0.00018475 | -1.80564 |
| CCDC18       | 0.00015  | -2.50929 | DCLK1              | 0.00071611 | -1.85816 | CA8          | 9.49E-06   | -1.80558 |
| FIGNL1       | 5.02E-06 | -2.50763 | SYNE2              | 1.31E-05   | -1.85662 | ---          | 0.00027138 | -1.80487 |
| DOK7         | 1.70E-06 | -2.5075  | GPNMB              | 4.06E-06   | -1.85607 | JAK2         | 0.00088827 | -1.80384 |
| CALML4       | 3.73E-05 | -2.50559 | ---                | 2.19E-06   | -1.8555  | PMEPA1       | 1.89E-05   | -1.80238 |
| PROCR        | 7.30E-05 | -2.504   | ANKRD52 /// UNQ583 | 1.16E-06   | -1.85338 | ORMDL3       | 0.038324   | -1.80233 |
| EML1         | 1.76E-06 | -2.50248 | MPZL1              | 8.01E-05   | -1.85311 | TMEM137      | 0.00010643 | -1.80138 |
| LOC100132181 | 4.31E-07 | -2.49911 | RGS22              | 3.14E-06   | -1.85292 | PCP4         | 3.09E-06   | -1.80112 |
| HDAC8        | 0.00053  | -2.49891 | ---                | 2.87E-05   | -1.85252 | NFATC2IP     | 3.01E-05   | -1.80042 |
| KIFC1        | 4.69E-08 | -2.49853 | THSD4              | 0.0135683  | -1.85214 | CBFB         | 8.93E-08   | -1.80001 |
| NOTCH2       | 4.57E-08 | -2.49744 | PRDM2              | 9.94E-05   | -1.84608 | FAM35A       | 8.38E-08   | -1.79999 |
| PCDH9        | 2.14E-06 | -2.49524 | NFATC2IP           | 2.23E-05   | -1.84537 | COX15        | 3.52E-07   | -1.7996  |
| ---          | 5.22E-09 | -2.49499 | SLITRK6            | 0.00099388 | -1.84474 | FANCA        | 3.95E-06   | -1.79859 |
| DEPDC1B      | 4.48E-07 | -2.49302 | SLC16A6            | 2.78E-06   | -1.84375 | NPY1R        | 5.37E-07   | -1.79813 |
| C14orf106    | 4.46E-08 | -2.49161 | ---                | 1.89E-07   | -1.84339 | ---          | 0.00706507 | -1.79754 |
| SUV39H1      | 4.91E-07 | -2.49063 | GNL3L              | 4.39E-07   | -1.84206 | C3           | 0.00012256 | -1.79684 |
| SGOL2        | 7.51E-07 | -2.48847 | CCDC85A            | 0.00047167 | -1.84206 | CENPI        | 0.00106674 | -1.79561 |
| CHEK1        | 2.43E-08 | -2.48628 | SLITRK4            | 0.00076411 | -1.84189 | FUS          | 0.0005632  | -1.79491 |
| SGOL2        | 8.73E-06 | -2.48537 | RPL31              | 3.70E-05   | -1.84086 | VAV3         | 0.00036186 | -1.79414 |
| CENPJ        | 4.19E-07 | -2.48339 | ---                | 1.84E-06   | -1.84038 | MXD1         | 0.00011071 | -1.79304 |
| NCAPG        | 8.58E-06 | -2.48186 | WDR68              | 1.58E-05   | -1.83998 | COL4A6       | 0.0184717  | -1.79139 |
| ERCC6L       | 7.30E-07 | -2.48131 | NOTCH2NL           | 1.29E-07   | -1.83907 | HECTD2       | 2.60E-05   | -1.78972 |
| ---          | 0.00019  | -2.48109 | GRB10              | 0.0116698  | -1.83887 | ---          | 6.58E-05   | -1.78709 |
| ---          | 2.44E-07 | -2.47988 | SULF2              | 3.12E-08   | -1.83872 | ---          | 3.22E-07   | -1.78695 |
| NUP50        | 2.50E-08 | -2.47924 | C4orf30            | 3.52E-05   | -1.83824 | GSN          | 0.00563564 | -1.78568 |
| SYNC1        | 1.49E-06 | -2.47873 | NHLRC3             | 2.26E-05   | -1.83726 | PIK3R1       | 6.45E-06   | -1.78427 |
| PSRC1        | 1.23E-08 | -2.47842 | ---                | 8.06E-06   | -1.83689 | ---          | 0.00021873 | -1.7842  |
| CENPA        | 2.19E-09 | -2.47783 | ---                | 0.00082616 | -1.83489 | NRIP1        | 4.89E-05   | -1.78192 |
| SLC8A1       | 1.19E-05 | -2.47778 | ---                | 4.13E-06   | -1.83171 | POMT2        | 0.00018642 | -1.78184 |
| RNF34        | 5.63E-05 | -2.47581 | LOC285382          | 0.0320285  | -1.83004 | SUV420H1     | 5.89E-07   | -1.78122 |
| ARF3         | 1.50E-07 | -2.47569 | UHMK1              | 0.00321888 | -1.82937 | SLC9A2       | 0.00033295 | -1.78113 |
| ---          | 0.00446  | -2.47471 | LOC730091          | 0.00021029 | -1.82875 | LYSMD1       | 0.0264055  | -1.781   |
| RPA1         | 5.30E-10 | -2.47444 | GLCCI1             | 5.06E-08   | -1.82846 | ---          | 0.00100354 | -1.78025 |
| WHSC1        | 2.33E-08 | -2.4736  | ZNF84              | 8.21E-06   | -1.82588 | RC3H2        | 0.00040331 | -1.77924 |
| SKP2         | 3.77E-07 | -2.47268 | PPP3R1 /// WDR92   | 0.00193509 | -1.82436 | HIST1H2BG    | 3.67E-06   | -1.77769 |
| DSCAM        | 3.85E-07 | -2.47149 | ---                | 0.133853   | -1.82255 | ---          | 0.00073747 | -1.77507 |

|                      |          |          |                   |            |          |                     |            |          |
|----------------------|----------|----------|-------------------|------------|----------|---------------------|------------|----------|
| KNTC1                | 9.71E-07 | -2.47105 | ---               | 0.00127871 | -1.82213 | ---                 | 4.82E-05   | -1.77506 |
| BNIPL                | 0.0003   | -2.46971 | PRODH             | 0.00065109 | -1.8216  | GTSE1               | 0.00124242 | -1.77416 |
| NAPEPLD              | 0.0002   | -2.46767 | ---               | 2.48E-05   | -1.82037 | NUP62               | 4.03E-05   | -1.77411 |
| EML3                 | 3.72E-06 | -2.46655 | SMTN              | 7.23E-06   | -1.8203  | RNFT2               | 0.00022968 | -1.7737  |
| TSGA14               | 1.19E-08 | -2.46641 | ---               | 2.28E-06   | -1.81983 | PCMTD1              | 0.00048453 | -1.7729  |
| RBM8A                | 1.48E-05 | -2.46547 | LGALS1            | 4.26E-07   | -1.81911 | CEP72               | 0.00388837 | -1.77244 |
| TDP1                 | 4.16E-06 | -2.4651  | CPEB4             | 0.00033468 | -1.81897 | HELLS               | 1.70E-05   | -1.77211 |
| NFATC2               | 2.85E-08 | -2.46316 | ---               | 2.05E-05   | -1.81591 | SERTAD4             | 1.86E-05   | -1.77169 |
| CDC74A /// CCDC74    | 2.51E-08 | -2.46061 | ---               | 2.93E-06   | -1.81452 | TET2                | 0.00294215 | -1.77024 |
| MLF1IP               | 5.27E-08 | -2.45927 | C22orf39          | 0.00120904 | -1.81421 | A4 /// UGT1A5 /// U | 0.00066041 | -1.76913 |
| LOC92482             | 1.10E-07 | -2.45619 | ---               | 0.00715815 | -1.81369 | PKD2                | 5.54E-06   | -1.76732 |
| LMBR1                | 6.26E-08 | -2.45473 | ---               | 0.000359   | -1.81131 | ABHD2               | 8.16E-06   | -1.76724 |
| CRTAP                | 8.28E-05 | -2.45429 | NEBL              | 2.51E-07   | -1.81128 | JAK1                | 4.19E-05   | -1.76643 |
| HSPC105              | 4.96E-06 | -2.45255 | ABHD2             | 5.97E-06   | -1.81049 | ---                 | 0.00115591 | -1.76564 |
| TRIM73               | 2.88E-07 | -2.45202 | C10orf33          | 2.47E-06   | -1.80997 | ZNF275              | 0.00209579 | -1.76449 |
| C13orf3              | 5.51E-06 | -2.44965 | MPZL1             | 4.08E-05   | -1.80873 | MITF                | 0.00330009 | -1.76355 |
| SLCO3A1              | 8.33E-05 | -2.44953 | DMPK              | 4.15E-09   | -1.80867 | DST                 | 1.71E-07   | -1.76344 |
| CENPM                | 2.16E-06 | -2.44855 | COX15             | 3.31E-07   | -1.80828 | PCMTD1              | 0.00010868 | -1.76294 |
| 13orf18 /// LOC72897 | 2.27E-08 | -2.44681 | LOC100128918      | 0.00027008 | -1.80763 | ESR1                | 5.88E-06   | -1.7617  |
| SLC35D1              | 8.64E-05 | -2.44648 | MPZL1             | 0.00017458 | -1.80756 | EIF2C2              | 6.54E-08   | -1.75994 |
| COL27A1              | 2.11E-05 | -2.44591 | ---               | 3.12E-06   | -1.80707 | RUFY2               | 6.92E-06   | -1.75969 |
| CCNF                 | 1.46E-08 | -2.44538 | RC3H2             | 0.00033822 | -1.80698 | PIK3R1              | 2.96E-06   | -1.75828 |
| CTDSPL               | 5.75E-05 | -2.44481 | EIF2AK1           | 0.00235009 | -1.8058  | ---                 | 1.29E-05   | -1.7578  |
| ---                  | 0.00168  | -2.44398 | EIF2S3            | 5.69E-05   | -1.80526 | SKP1                | 3.76E-06   | -1.75753 |
| CD44                 | 0.00053  | -2.4428  | FERMT2            | 9.68E-09   | -1.80472 | SNX4                | 2.68E-07   | -1.75691 |
| CDC6                 | 1.33E-07 | -2.44232 | SLC35A4           | 7.47E-07   | -1.8043  | ---                 | 0.00011608 | -1.75624 |
| CRABP1               | 2.30E-06 | -2.44174 | ---               | 0.00010629 | -1.8041  | ---                 | 0.00052377 | -1.75548 |
| ---                  | 2.24E-07 | -2.44162 | SLITRK6           | 1.08E-06   | -1.80346 | LOC100132798        | 4.67E-06   | -1.75502 |
| CDCA3                | 4.31E-08 | -2.44128 | PODXL             | 7.74E-08   | -1.80338 | NUP214              | 0.00307333 | -1.75411 |
| BIRC5                | 4.13E-07 | -2.44082 | SLC36A1           | 1.44E-05   | -1.80189 | SVIL                | 1.48E-05   | -1.75209 |
| TOP2A                | 6.61E-07 | -2.43986 | C6orf141          | 0.00080238 | -1.80127 | GTF2E1              | 1.10E-06   | -1.75167 |
| ---                  | 1.89E-05 | -2.43897 | HSPC159           | 3.04E-05   | -1.80117 | ---                 | 0.00957912 | -1.75137 |
| GINS2                | 2.60E-10 | -2.43896 | LOC375295         | 0.00107572 | -1.80017 | NLN                 | 0.00055263 | -1.75073 |
| CDC7                 | 1.84E-07 | -2.43726 | HDLBP             | 8.04E-07   | -1.79986 | ASB13               | 0.00059216 | -1.74976 |
| SPIN4                | 2.14E-06 | -2.43722 | HIPK1             | 0.00050876 | -1.79985 | CXXC5               | 8.39E-08   | -1.74755 |
| HLA-DMA              | 0.00012  | -2.43615 | RPS15A            | 0.00013312 | -1.79893 | ---                 | 0.00049844 | -1.74734 |
| AHNAK2               | 0.01463  | -2.4344  | KIAA1632          | 0.00491155 | -1.79892 | WDR68               | 3.04E-05   | -1.74692 |
| ---                  | 0.00054  | -2.43377 | ---               | 4.33E-07   | -1.79805 | PAM                 | 1.75E-07   | -1.74614 |
| RFC5                 | 3.14E-08 | -2.43188 | UGT1A4 /// UGT1A6 | 9.28E-07   | -1.79758 | UGT1A4 /// UGT1A    | 1.64E-05   | -1.74573 |
| ---                  | 4.49E-06 | -2.42801 | NASP              | 0.00018816 | -1.79688 | ---                 | 4.74E-06   | -1.7456  |
| NP                   | 1.32E-08 | -2.42691 | SUV420H1          | 5.28E-07   | -1.79583 | ABHD2               | 1.35E-06   | -1.74308 |
| TMPO                 | 8.11E-06 | -2.42648 | PRSS23            | 0.014129   | -1.79545 | TSPAN15             | 7.90E-06   | -1.74172 |
| ADCY1                | 4.53E-08 | -2.42598 | LOC100132181      | 1.30E-05   | -1.7945  | ZNF789              | 0.0001465  | -1.74164 |
| SAMD11               | 9.68E-06 | -2.4222  | ---               | 0.00101695 | -1.79361 | ---                 | 0.00404037 | -1.74148 |
| ANLN                 | 8.48E-08 | -2.42173 | GOLGA1            | 2.60E-05   | -1.79297 | ARHGAP21            | 3.69E-05   | -1.7411  |
| LOC649305            | 1.81E-07 | -2.42168 | ---               | 1.63E-06   | -1.79253 | TMCO1               | 1.85E-08   | -1.74075 |
| PPIL5                | 4.02E-11 | -2.4199  | GTF2E1            | 8.12E-07   | -1.79151 | LOC254128           | 0.00017545 | -1.73974 |
| FANCG /// VCP        | 2.13E-09 | -2.41825 | POMT2             | 0.00017525 | -1.79118 | CD47                | 0.00292619 | -1.73952 |
| HMMR                 | 2.13E-06 | -2.41619 | DOK3              | 0.00215893 | -1.78943 | NUP62               | 1.67E-06   | -1.73645 |

|              |          |          |                 |            |          |                     |            |          |
|--------------|----------|----------|-----------------|------------|----------|---------------------|------------|----------|
| NASP         | 1.10E-08 | -2.41591 | WEE1            | 8.00E-07   | -1.78669 | NKRD52 /// UNQ583   | 2.72E-06   | -1.73625 |
| RPL37        | 6.04E-05 | -2.41435 | LYN             | 0.00014746 | -1.78561 | ---                 | 0.00015467 | -1.73469 |
| ACOT7        | 8.06E-08 | -2.41322 | ---             | 0.0434919  | -1.78522 | SF1                 | 0.00475735 | -1.73456 |
| ERCC1        | 1.57E-05 | -2.4124  | EIF2C2          | 5.39E-08   | -1.78511 | ---                 | 0.013918   | -1.73444 |
| CALML4       | 2.08E-06 | -2.41123 | PACS2           | 3.68E-07   | -1.78463 | FOXRED2             | 6.49E-05   | -1.73408 |
| ---          | 1.06E-05 | -2.41003 | ---             | 0.00090228 | -1.7844  | 3D /// HIST1H3E /// | 0.00455143 | -1.73165 |
| ---          | 0.0013   | -2.41002 | C12orf60        | 0.00075057 | -1.78258 | RAD51               | 0.00012031 | -1.73146 |
| LOC54492     | 1.16E-10 | -2.4097  | ---             | 0.00027438 | -1.78169 | HIST1H1C            | 5.02E-07   | -1.73039 |
| CDCA2        | 2.02E-06 | -2.40927 | ---             | 4.88E-06   | -1.7816  | TCF3                | 0.00201959 | -1.73032 |
| ---          | 2.50E-07 | -2.40923 | RPL37           | 0.00105295 | -1.77972 | EVL                 | 5.46E-08   | -1.72955 |
| ---          | 1.32E-07 | -2.40892 | TncRNA          | 4.23E-06   | -1.77944 | ---                 | 0.0004545  | -1.72801 |
| MLLT11       | 9.79E-06 | -2.40744 | GP1BB /// SEPT5 | 0.00035193 | -1.77906 | LOC401320           | 0.0116993  | -1.72757 |
| CRTAP        | 0.00027  | -2.40556 | TncRNA          | 2.05E-07   | -1.779   | PCDH9               | 9.49E-05   | -1.72722 |
| MCM2         | 1.24E-07 | -2.40483 | ZFH3            | 1.89E-07   | -1.77778 | ---                 | 0.00014927 | -1.7271  |
| ZAK          | 1.64E-06 | -2.40392 | LOC100133660    | 3.88E-06   | -1.77673 | TMCO1               | 2.85E-06   | -1.727   |
| FLJ25076     | 5.88E-08 | -2.40277 | ---             | 7.23E-05   | -1.77346 | H2AFJ               | 0.00079469 | -1.72624 |
| BUB1         | 1.92E-08 | -2.40074 | ---             | 0.00727776 | -1.77278 | WHSC1               | 1.24E-06   | -1.72306 |
| AP3S1        | 4.66E-11 | -2.39933 | ADIPOR1         | 5.07E-08   | -1.77194 | AKAP13              | 0.00121301 | -1.72066 |
| ---          | 3.97E-05 | -2.39931 | SEMA3A          | 0.00235911 | -1.77181 | TCF3                | 6.95E-08   | -1.72009 |
| PFTK1        | 8.80E-07 | -2.39901 | WDR68           | 4.94E-08   | -1.77156 | SEMA3A              | 0.00322887 | -1.71906 |
| CBL          | 0.00046  | -2.39711 | RNFT2           | 0.00023585 | -1.76974 | OSTM1               | 0.00113837 | -1.71772 |
| SMC4         | 4.24E-10 | -2.39663 | SDC2            | 1.35E-06   | -1.76913 | ---                 | 0.00189812 | -1.7169  |
| ---          | 6.32E-08 | -2.39635 | LPP             | 8.90E-07   | -1.76882 | BRCA1               | 0.00092655 | -1.71644 |
| YWHAQ        | 3.12E-07 | -2.39634 | ---             | 9.45E-07   | -1.76728 | C9orf100            | 0.00020996 | -1.71378 |
| TBCCD1       | 0.01812  | -2.39614 | WHSC1           | 0.0006406  | -1.76481 | DLC1                | 7.75E-07   | -1.71347 |
| SFRS9        | 3.13E-10 | -2.39557 | ---             | 1.13E-07   | -1.76473 | ---                 | 8.31E-06   | -1.71317 |
| ---          | 2.85E-05 | -2.39484 | P704P           | 3.81E-08   | -1.76199 | DICER1              | 0.00043846 | -1.71312 |
| HJURP        | 4.38E-08 | -2.39375 | ---             | 3.50E-05   | -1.76156 | CD44                | 0.0143007  | -1.71268 |
| DHTKD1       | 4.22E-07 | -2.39323 | SRRM2           | 0.00074336 | -1.76117 | ESPL1               | 4.25E-06   | -1.7116  |
| C12orf48     | 1.05E-05 | -2.39297 | ---             | 0.00012426 | -1.76043 | FUS                 | 8.55E-06   | -1.71137 |
| GRK6         | 1.14E-06 | -2.38869 | UBE4B           | 0.00014123 | -1.75793 | SYNE2               | 0.0004062  | -1.70977 |
| SMC2         | 2.67E-07 | -2.3873  | PIK3R1          | 3.52E-05   | -1.75773 | NFATC2IP            | 0.00064707 | -1.70905 |
| RNASEH2A     | 9.91E-08 | -2.38158 | PREX1           | 1.25E-08   | -1.75736 | LOC100133660        | 6.58E-06   | -1.70904 |
| ---          | 3.05E-05 | -2.38147 | ARSG            | 0.00050191 | -1.75726 | DICER1              | 6.24E-05   | -1.7083  |
| YWHAQ        | 1.40E-11 | -2.38078 | C6orf120        | 1.52E-06   | -1.75675 | ---                 | 0.00022643 | -1.70809 |
| C9orf40      | 5.73E-05 | -2.38046 | C1orf34         | 3.16E-06   | -1.75624 | DEPDC1              | 9.85E-07   | -1.70745 |
| ---          | 4.05E-06 | -2.37921 | LOC143381       | 7.20E-09   | -1.75577 | PACS2               | 6.80E-07   | -1.70739 |
| LOC100133660 | 1.65E-07 | -2.3785  | ---             | 0.00020331 | -1.75519 | NBPF4               | 0.00026249 | -1.70684 |
| TROAP        | 1.73E-08 | -2.37784 | ---             | 5.42E-05   | -1.75478 | DEPDC1              | 1.34E-05   | -1.70663 |
| ---          | 2.48E-10 | -2.37737 | ---             | 0.00190703 | -1.75459 | HP1BP3              | 0.00016089 | -1.70602 |
| C14orf112    | 1.56E-06 | -2.37462 | ---             | 0.00259983 | -1.75378 | ELP3                | 8.32E-06   | -1.7059  |
| LOC150166    | 3.14E-05 | -2.37105 | FAM134A         | 5.63E-08   | -1.75346 | DMPK                | 9.46E-09   | -1.70583 |
| CCDC14       | 7.01E-08 | -2.36998 | ---             | 0.0329341  | -1.75267 | PHACTR4             | 1.42E-05   | -1.70546 |
| CDT1         | 6.58E-09 | -2.36981 | LRRC23          | 0.00365222 | -1.75227 | ---                 | 1.55E-06   | -1.70521 |
| C10orf57     | 2.38E-06 | -2.3698  | GNL3L           | 4.22E-06   | -1.74993 | WFS1                | 4.96E-06   | -1.70512 |
| ---          | 7.57E-08 | -2.36961 | SLC19A2         | 0.00054753 | -1.74861 | C17orf63            | 0.0148946  | -1.70506 |
| TUBB         | 7.40E-11 | -2.36854 | NR2F2           | 6.44E-05   | -1.74773 | ---                 | 6.33E-06   | -1.70248 |
| TSPAN4       | 7.75E-06 | -2.36803 | ---             | 0.00017019 | -1.74753 | ---                 | 1.98E-06   | -1.70243 |
| UBE2R2       | 3.21E-07 | -2.36789 | POLR2J4         | 3.46E-06   | -1.74751 | UHMK1               | 0.00196299 | -1.7013  |

|                    |          |          |                     |            |          |                   |            |          |
|--------------------|----------|----------|---------------------|------------|----------|-------------------|------------|----------|
| TMCC1              | 4.86E-05 | -2.36751 | ---                 | 0.00277831 | -1.74725 | SMTN              | 0.00021646 | -1.70105 |
| ---                | 1.64E-06 | -2.36667 | MITF                | 0.010664   | -1.7467  | PRLR              | 0.00260483 | -1.69932 |
| IQGAP3             | 0.00015  | -2.36269 | HECW2               | 0.00350194 | -1.74506 | BRIP1             | 0.00028173 | -1.69799 |
| MTSS1              | 2.00E-11 | -2.36215 | C2orf55             | 7.90E-05   | -1.74505 | AMFR              | 0.0443091  | -1.69653 |
| PTPLAD1            | 1.59E-07 | -2.36202 | KIF14               | 2.33E-06   | -1.74488 | THBS1             | 6.45E-07   | -1.69588 |
| ---                | 4.03E-06 | -2.36041 | ---                 | 0.00014038 | -1.74481 | RBP7              | 0.0251317  | -1.69542 |
| MCM7               | 9.37E-09 | -2.36029 | MITF                | 0.00371286 | -1.74303 | ---               | 2.15E-06   | -1.69531 |
| TFF3               | 2.99E-08 | -2.3602  | GLCCI1              | 3.95E-09   | -1.74298 | EPPK1             | 0.00557721 | -1.69512 |
| CHEK1              | 2.52E-05 | -2.35741 | CDK6                | 0.00308001 | -1.74268 | ---               | 0.00025069 | -1.69497 |
| CTPS2              | 1.64E-08 | -2.35736 | EIF2S3              | 1.60E-07   | -1.74199 | ISCA1             | 0.00026059 | -1.69455 |
| CENPL              | 6.28E-06 | -2.357   | RAB30               | 6.06E-05   | -1.741   | ---               | 0.0087074  | -1.69449 |
| ---                | 0.00508  | -2.35696 | JAK1                | 0.00037866 | -1.7393  | SULF1             | 0.00015921 | -1.69393 |
| THBD               | 0.00053  | -2.35428 | MTERFD3             | 0.00017035 | -1.73812 | ---               | 0.00036138 | -1.69373 |
| PIGM               | 0.00068  | -2.35358 | TCF3                | 6.03E-08   | -1.73732 | NOLC1             | 1.34E-06   | -1.6932  |
| SPAG5              | 2.17E-06 | -2.3535  | POLR2J4             | 4.22E-06   | -1.73632 | FLJ41747          | 0.0113105  | -1.69286 |
| UPK3B              | 0.00025  | -2.35317 | ---                 | 0.00038658 | -1.73615 | ELF1              | 0.00019902 | -1.69274 |
| POLE2              | 3.76E-07 | -2.35045 | WDR68               | 1.29E-08   | -1.73542 | C9orf130          | 0.00069663 | -1.69252 |
| ---                | 2.62E-06 | -2.34574 | ---                 | 0.00493367 | -1.73519 | ZNF703            | 0.00022798 | -1.69066 |
| TFDP1              | 1.22E-06 | -2.34518 | WSB1                | 1.27E-06   | -1.73371 | MEGF6             | 0.00017875 | -1.69053 |
| SHANK2             | 0.00038  | -2.34495 | LOC401320           | 0.0113454  | -1.73355 | NUPL1             | 0.00149164 | -1.69018 |
| HOOK1              | 8.29E-08 | -2.34443 | ZFH3                | 7.90E-05   | -1.73252 | TMEM167           | 7.43E-06   | -1.68997 |
| POLD1              | 5.00E-10 | -2.34399 | C20orf199           | 0.00018759 | -1.73159 | NHSL1             | 1.87E-06   | -1.68979 |
| CARHSP1            | 5.05E-08 | -2.34322 | ANK3                | 0.0105946  | -1.73147 | ---               | 0.0028769  | -1.68834 |
| SRR                | 1.35E-06 | -2.34177 | CBFB                | 1.53E-07   | -1.73117 | NR2F2             | 0.00010137 | -1.68807 |
| CDC45L             | 8.41E-08 | -2.33972 | PAM                 | 0.00014844 | -1.73072 | NFIC              | 0.00027899 | -1.68783 |
| NPAL2              | 1.52E-08 | -2.33854 | LOC728198 /// TAF9B | 1.12E-06   | -1.73066 | SMTN              | 1.96E-05   | -1.68782 |
| POLR3G             | 0.00285  | -2.33819 | LMBR1               | 7.79E-07   | -1.72967 | ATXN1             | 1.34E-06   | -1.6878  |
| AHI1               | 9.91E-05 | -2.33735 | MAGED2              | 8.33E-09   | -1.72951 | MAPT              | 1.87E-06   | -1.68725 |
| ---                | 1.03E-07 | -2.33719 | JAK1                | 6.86E-07   | -1.72792 | LRRFIP1           | 2.31E-05   | -1.68643 |
| GINS1              | 1.85E-08 | -2.33669 | ---                 | 0.00053494 | -1.72693 | FOXM1             | 1.13E-05   | -1.68638 |
| GSN                | 7.09E-09 | -2.3361  | ---                 | 0.0450972  | -1.72652 | APOLD1            | 0.0228229  | -1.68619 |
| PBK                | 1.26E-08 | -2.33604 | ---                 | 0.00023798 | -1.7258  | PRDM2             | 0.00030021 | -1.68527 |
| TMPO               | 7.64E-07 | -2.33601 | TMEM137             | 0.00018014 | -1.72552 | AHNAK2            | 6.34E-05   | -1.68481 |
| CAND1              | 5.93E-08 | -2.33575 | UGT1A4 /// UGT1A6   | 1.92E-05   | -1.72546 | TMEM194           | 7.17E-08   | -1.68376 |
| C5orf21            | 4.61E-07 | -2.33443 | HMOX1               | 0.00106214 | -1.72514 | WDR59             | 0.00237314 | -1.6837  |
| LOC100133315       | 0.0005   | -2.33431 | SMTN                | 0.00018165 | -1.72469 | SPEN              | 0.00471264 | -1.68341 |
| CENPK              | 0.00017  | -2.33415 | ---                 | 0.00678958 | -1.72418 | HMOX1             | 0.00141163 | -1.68334 |
| C14orf145          | 0.0006   | -2.33321 | ---                 | 0.00305337 | -1.72196 | GTSE1             | 9.23E-05   | -1.68329 |
| LOC440288          | 0.00011  | -2.33064 | LOC91431            | 0.00163679 | -1.72135 | ---               | 0.00028249 | -1.6828  |
| CDK5RAP2           | 1.02E-06 | -2.33049 | WEE1                | 1.32E-05   | -1.72086 | ABHD2             | 0.00044698 | -1.6824  |
| AURKB              | 2.62E-07 | -2.33016 | PDLIM5              | 9.31E-06   | -1.72064 | ABCA5             | 0.00592242 | -1.68203 |
| RPA1               | 4.17E-08 | -2.33004 | PLLP                | 0.00023596 | -1.72021 | ---               | 0.00146929 | -1.68147 |
| ---                | 2.09E-05 | -2.32916 | ---                 | 0.0013761  | -1.71998 | POLA2             | 8.25E-06   | -1.68126 |
| PTMA               | 9.57E-08 | -2.32893 | CALCOCO1            | 0.00060063 | -1.71876 | CTSD              | 3.19E-06   | -1.68078 |
| MGC39900 /// TMSL8 | 5.72E-07 | -2.3281  | ---                 | 6.07E-07   | -1.71791 | FBXO16 /// ZNF395 | 0.00053642 | -1.68036 |
| PTMAP4             | 4.65E-08 | -2.32732 | ISCA1               | 0.00022215 | -1.71598 | ZRANB3            | 0.00125973 | -1.68021 |
| ---                | 3.67E-05 | -2.32452 | TXNDC12             | 1.73E-08   | -1.71594 | EPHA4             | 3.70E-05   | -1.67998 |
| NFATC2IP           | 2.82E-05 | -2.3244  | LOC728198 /// TAF9B | 0.00024689 | -1.71556 | C10orf2           | 0.00124402 | -1.67974 |
| RRM1               | 5.56E-08 | -2.3235  | ---                 | 0.00123864 | -1.71541 | LOC100129917      | 0.00250623 | -1.6794  |

|                     |          |          |                       |            |          |          |            |          |
|---------------------|----------|----------|-----------------------|------------|----------|----------|------------|----------|
| BIRC5               | 4.01E-06 | -2.32253 | FAM111B               | 5.81E-05   | -1.71493 | ---      | 0.010726   | -1.67901 |
| WHSC1               | 1.24E-09 | -2.3181  | ---                   | 0.00069467 | -1.71379 | ---      | 0.00181744 | -1.67866 |
| PGM2                | 1.27E-05 | -2.31802 | CTPS2                 | 6.22E-07   | -1.71354 | NFATC3   | 0.00076211 | -1.67863 |
| MKI67               | 5.66E-08 | -2.31797 | ---                   | 0.00016769 | -1.71297 | C20orf94 | 1.13E-05   | -1.67835 |
| 100132218 /// LOC72 | 8.85E-06 | -2.3172  | C20orf117             | 0.00049828 | -1.7126  | BNIP3L   | 2.09E-05   | -1.67826 |
| LMBR1               | 2.79E-08 | -2.31571 | ---                   | 1.82E-06   | -1.71259 | CAPRIN2  | 0.0009691  | -1.67823 |
| CCDC90A             | 4.70E-07 | -2.31531 | JAK1                  | 0.005821   | -1.7091  | ---      | 0.00113772 | -1.67718 |
| PLEKHB2             | 1.63E-05 | -2.3151  | GREB1                 | 0.00376178 | -1.7088  | CDH26    | 0.00203468 | -1.67626 |
| POGK                | 0.00077  | -2.3151  | ELP3                  | 8.19E-06   | -1.70775 | KLC1     | 2.11E-08   | -1.67615 |
| PTMA                | 1.43E-10 | -2.31487 | SNX4                  | 4.06E-07   | -1.70592 | CDV3     | 2.19E-07   | -1.67558 |
| CSNK2A2             | 1.54E-06 | -2.31451 | COX15                 | 0.00121354 | -1.70592 | SBK1     | 0.00063138 | -1.67552 |
| PCDH7               | 0.00076  | -2.31334 | ---                   | 0.00032919 | -1.70564 | ---      | 0.00227449 | -1.67522 |
| HNMT                | 8.62E-05 | -2.31324 | BNIP3L                | 1.67E-05   | -1.70515 | NENF     | 9.40E-05   | -1.67504 |
| ---                 | 7.48E-06 | -2.31184 | CDV3                  | 6.80E-08   | -1.70507 | CD47     | 1.96E-06   | -1.67433 |
| NCAPG2              | 5.45E-08 | -2.31156 | PREX1                 | 1.27E-07   | -1.70452 | SAFB     | 6.10E-09   | -1.67392 |
| FAM111B             | 3.36E-05 | -2.31057 | MAPT                  | 1.63E-06   | -1.70348 | ZNF311   | 0.00193893 | -1.6733  |
| C5orf34             | 2.88E-07 | -2.31009 | ---                   | 0.00172273 | -1.70336 | SGPL1    | 6.67E-07   | -1.67259 |
| CCDC99              | 5.59E-07 | -2.30896 | ---                   | 7.49E-07   | -1.70175 | AKAP13   | 2.47E-05   | -1.67142 |
| CAP1                | 1.27E-09 | -2.30846 | LOC645722             | 3.20E-07   | -1.70173 | CMTM3    | 0.00567153 | -1.67132 |
| TACC3               | 1.30E-07 | -2.30553 | FLJ27365              | 0.00350759 | -1.70034 | HIPK2    | 1.36E-05   | -1.67129 |
| SYTL5               | 5.55E-07 | -2.30468 | RIMS3                 | 0.0088323  | -1.69992 | PRICKLE2 | 2.47E-05   | -1.6704  |
| CAND1               | 3.36E-06 | -2.30399 | UBE2G2                | 3.09E-05   | -1.69976 | ---      | 0.0800167  | -1.67034 |
| MECP2               | 1.34E-05 | -2.30361 | POLQ                  | 0.00087363 | -1.69957 | MAPT     | 5.80E-05   | -1.67012 |
| DSCR6               | 4.11E-06 | -2.30186 | ---                   | 0.00093375 | -1.69957 | WDSOF1   | 0.00737439 | -1.66993 |
| FAM54A              | 6.06E-08 | -2.29947 | LMBR1                 | 1.23E-06   | -1.69919 | KIAA0100 | 0.00327784 | -1.6698  |
| ---                 | 4.04E-08 | -2.29894 | LRRFIP1               | 0.00031301 | -1.69902 | RBM9     | 0.00112725 | -1.66913 |
| C14orf106           | 4.14E-05 | -2.29793 | GLCCI1                | 0.00022219 | -1.69885 | ---      | 2.73E-05   | -1.66875 |
| ---                 | 1.91E-06 | -2.29738 | ESR1                  | 9.66E-06   | -1.69878 | ---      | 0.00253116 | -1.66852 |
| KDELC1              | 0.00874  | -2.29682 | NBPF4                 | 0.00028072 | -1.69782 | ---      | 0.0127392  | -1.66851 |
| CENPN               | 4.18E-08 | -2.29651 | POLR2J4               | 5.10E-07   | -1.69751 | SSFA2    | 1.09E-07   | -1.66794 |
| ECT2                | 1.34E-07 | -2.29554 | KCNMB4                | 6.76E-05   | -1.69713 | ABLIM1   | 0.00028985 | -1.66787 |
| FAM113B             | 0.00214  | -2.29394 | SFRS7                 | 5.62E-06   | -1.69619 | GLCCI1   | 0.00074747 | -1.66742 |
| RBBP9               | 0.00017  | -2.2928  | CD47                  | 0.00048218 | -1.69521 | WNK1     | 0.00093947 | -1.66631 |
| SFRS9               | 2.55E-09 | -2.29262 | 58 /// LOC100133666 / | 6.33E-05   | -1.69516 | ESPL1    | 4.23E-07   | -1.66573 |
| ---                 | 0.00694  | -2.29259 | POLR2J4               | 0.00084199 | -1.69342 | C5orf28  | 0.0003024  | -1.66572 |
| TMEM39B             | 2.22E-05 | -2.29101 | ---                   | 0.0133531  | -1.69325 | GSN      | 3.85E-07   | -1.66513 |
| NUSAP1              | 7.49E-08 | -2.28982 | GPR126                | 0.00218327 | -1.69304 | C22orf39 | 0.00306678 | -1.66453 |
| ---                 | 3.09E-05 | -2.28831 | RNF44                 | 5.92E-08   | -1.69277 | C4orf30  | 0.00012508 | -1.66411 |
| CBX5                | 7.95E-08 | -2.28686 | CALML5                | 5.15E-05   | -1.69273 | ---      | 9.58E-06   | -1.66361 |
| OAT                 | 8.21E-10 | -2.28674 | ACADM                 | 8.16E-05   | -1.69253 | PIF1     | 1.75E-05   | -1.66282 |
| SLC39A9             | 6.80E-11 | -2.28647 | ---                   | 4.71E-05   | -1.69245 | GNL3L    | 1.80E-06   | -1.66248 |
| TIAM1               | 2.60E-06 | -2.28626 | ---                   | 0.00207694 | -1.69238 | EML1     | 0.00013524 | -1.66208 |
| ---                 | 4.92E-06 | -2.28527 | ZBTB5                 | 5.12E-07   | -1.6923  | FANCI    | 6.42E-07   | -1.66159 |
| TCF3                | 2.53E-09 | -2.28245 | LOC401320             | 9.33E-05   | -1.69215 | ---      | 1.93E-09   | -1.66144 |
| DTL                 | 4.34E-08 | -2.28058 | FKBP5                 | 1.82E-06   | -1.69093 | ---      | 0.00071889 | -1.66038 |
| OIP5                | 4.68E-07 | -2.27988 | TNK2                  | 5.99E-05   | -1.69038 | ACADM    | 0.00010596 | -1.66031 |
| TOP2A               | 4.57E-09 | -2.2796  | LOC149832             | 0.00789483 | -1.69001 | WSB2     | 2.01E-08   | -1.65942 |
| PTMAP7              | 8.45E-08 | -2.27947 | ---                   | 4.70E-05   | -1.68933 | WFS1     | 1.32E-05   | -1.6589  |
| STAG3L1             | 3.95E-06 | -2.27916 | TUSC3                 | 0.00308498 | -1.68896 | CENPF    | 0.00012004 | -1.65825 |

|                     |          |          |            |            |          |                     |            |          |
|---------------------|----------|----------|------------|------------|----------|---------------------|------------|----------|
| AP2B1               | 9.60E-12 | -2.27879 | IGSF5      | 0.00119312 | -1.68857 | NRIP1               | 2.82E-07   | -1.65776 |
| C11orf82            | 3.41E-07 | -2.27762 | IL6ST      | 6.38E-05   | -1.68661 | HIPK1               | 2.82E-06   | -1.65693 |
| CEP110              | 0.0003   | -2.27655 | SLC26A6    | 0.00265648 | -1.68661 | ---                 | 8.07E-05   | -1.65507 |
| TYMK /// LOC72776   | 1.52E-09 | -2.27646 | NRIP1      | 0.0001001  | -1.68576 | WDR52               | 0.00751453 | -1.6546  |
| NUDT1               | 3.54E-07 | -2.27587 | ST6GALNAC2 | 4.64E-09   | -1.68528 | C11orf82            | 1.43E-05   | -1.65433 |
| EIF4E2              | 0.00256  | -2.27531 | NKAIN1     | 0.00764101 | -1.68513 | FBXO17              | 0.00514421 | -1.6541  |
| ---                 | 8.09E-05 | -2.27514 | SLC44A1    | 0.0337801  | -1.68513 | WDR52               | 0.00238186 | -1.65395 |
| MCM3APAS            | 0.00011  | -2.27472 | MCM3APAS   | 0.00206092 | -1.68406 | SULF2               | 1.41E-07   | -1.6529  |
| PMEPA1              | 1.55E-06 | -2.2744  | ESR1       | 0.00122091 | -1.68399 | CD99                | 1.36E-07   | -1.65263 |
| GRSF1               | 3.59E-06 | -2.27219 | CD47       | 1.80E-06   | -1.68389 | GALNT3              | 1.45E-06   | -1.65218 |
| ---                 | 0.00076  | -2.27215 | ZFH3       | 0.00028918 | -1.68376 | PPL                 | 2.12E-07   | -1.65166 |
| HNRPDL              | 5.28E-07 | -2.27038 | ---        | 0.00251087 | -1.68375 | MGC16121            | 2.00E-05   | -1.65054 |
| ATAD2               | 2.51E-07 | -2.27015 | LIN52      | 2.80E-06   | -1.68344 | FKTN                | 1.25E-05   | -1.65023 |
| LOC375295           | 0.00012  | -2.26996 | SIVA1      | 0.00017473 | -1.68216 | FERMT2              | 4.09E-05   | -1.65015 |
| HMMR                | 5.63E-08 | -2.26982 | ABCG2      | 0.00013051 | -1.68196 | ERBB3               | 0.00158704 | -1.64905 |
| PC                  | 8.11E-06 | -2.26912 | C14orf85   | 1.68E-06   | -1.68165 | ROD1                | 6.36E-08   | -1.64874 |
| RNF138              | 2.94E-08 | -2.2678  | ---        | 0.00096078 | -1.68164 | TLR2                | 0.00776402 | -1.64829 |
| CAPS                | 1.40E-05 | -2.26471 | WDR61      | 1.68E-05   | -1.68138 | ---                 | 0.00333286 | -1.64713 |
| POMZP3              | 4.04E-10 | -2.26442 | MLLT3      | 0.00274566 | -1.68098 | CDC20               | 1.70E-05   | -1.64688 |
| TK1                 | 1.22E-10 | -2.26311 | BSPRY      | 1.25E-05   | -1.68057 | AKAP13              | 0.00113242 | -1.64556 |
| MEGF6               | 7.41E-06 | -2.26266 | THBS1      | 7.42E-07   | -1.67973 | SERTAD4             | 0.00383979 | -1.64544 |
| PARVA               | 0.00017  | -2.26228 | DHFR       | 0.00028936 | -1.67905 | l3orf18 /// LOC7289 | 0.0386309  | -1.64528 |
| ADCY1               | 1.92E-07 | -2.26062 | PCP4       | 8.05E-06   | -1.67889 | PPP1R1C             | 4.49E-05   | -1.64517 |
| ARMC9               | 1.72E-05 | -2.25995 | SIPA1L1    | 0.00048846 | -1.67856 | CHSY1               | 1.28E-07   | -1.64487 |
| ZNF785              | 4.73E-06 | -2.25992 | MALAT1     | 0.089664   | -1.67838 | ---                 | 5.65E-05   | -1.64481 |
| BRCA2               | 2.18E-06 | -2.2595  | ACVR2B     | 0.00171462 | -1.67747 | C5                  | 0.00630739 | -1.64458 |
| ZNF789              | 6.13E-07 | -2.25529 | SAMD4A     | 0.00629511 | -1.67717 | USP21               | 9.23E-05   | -1.64457 |
| ---                 | 0.00101  | -2.25514 | SDHALP1    | 0.00016977 | -1.67658 | HSPC159             | 0.0001012  | -1.64428 |
| FLJ13305            | 0.00028  | -2.25508 | UCP2       | 1.50E-05   | -1.67624 | KIAA1333            | 1.69E-06   | -1.64337 |
| YWHAQ               | 1.99E-10 | -2.25496 | ---        | 3.83E-05   | -1.6756  | C15orf29            | 2.02E-05   | -1.64328 |
| CAP1                | 7.73E-11 | -2.2536  | ---        | 0.00495506 | -1.67502 | CENPJ               | 4.00E-05   | -1.64304 |
| CCNY                | 4.58E-06 | -2.25195 | QSER1      | 0.00423778 | -1.67491 | H2AFJ               | 0.0002097  | -1.6423  |
| PGM2                | 9.88E-07 | -2.25172 | ---        | 0.00031063 | -1.67482 | DNAL1               | 4.44E-05   | -1.64168 |
| PKMYT1              | 5.35E-06 | -2.25169 | ---        | 0.00879694 | -1.67422 | GTSE1               | 0.00043519 | -1.64148 |
| MEA1                | 7.24E-10 | -2.25147 | ---        | 0.00053907 | -1.67379 | ---                 | 0.00255762 | -1.64139 |
| TDP1                | 2.31E-07 | -2.25147 | C5orf28    | 0.00028428 | -1.6736  | ESR1                | 0.00166968 | -1.64072 |
| EPR1                | 6.34E-07 | -2.24986 | LYSMD1     | 0.0416304  | -1.67357 | C2orf55             | 0.00017904 | -1.64068 |
| OC100129680 /// PLA | 3.28E-05 | -2.24693 | HIST1H3E   | 0.00705722 | -1.67325 | SVIL                | 0.00027345 | -1.64061 |
| ---                 | 1.33E-06 | -2.24635 | FOXRED2    | 0.00010451 | -1.67291 | CD47                | 6.74E-06   | -1.64011 |
| NXT2                | 6.08E-07 | -2.24485 | MICAL2     | 0.00111904 | -1.67224 | TCHH                | 0.00452853 | -1.63917 |
| ---                 | 4.40E-05 | -2.2433  | ---        | 8.75E-06   | -1.67095 | ---                 | 0.00092126 | -1.639   |
| KIF20A              | 2.90E-09 | -2.24189 | ---        | 1.49E-07   | -1.67083 | AURKB               | 0.0283994  | -1.63895 |
| ---                 | 5.15E-05 | -2.24166 | WDR40A     | 1.71E-07   | -1.6702  | ---                 | 0.00139203 | -1.63871 |
| GPR19               | 2.01E-07 | -2.24085 | ---        | 0.00038896 | -1.67016 | ---                 | 0.00030077 | -1.6387  |
| ---                 | 0.00498  | -2.24003 | PGM2       | 3.12E-05   | -1.6692  | FLJ20464            | 0.00564644 | -1.63795 |
| KIAA1524            | 1.07E-05 | -2.24002 | DICER1     | 0.0006098  | -1.66826 | PAM                 | 2.20E-05   | -1.63778 |
| SRR                 | 1.54E-05 | -2.23975 | WDR52      | 0.00216259 | -1.66777 | ---                 | 0.00273407 | -1.63769 |
| E2F1                | 8.21E-06 | -2.23951 | SERTAD4    | 0.00331032 | -1.66743 | LOC642533           | 3.46E-05   | -1.6376  |
| ---                 | 7.82E-07 | -2.23416 | METTL3     | 0.00026904 | -1.6673  | ---                 | 0.00812853 | -1.63748 |



|                   |          |          |              |            |          |                       |            |          |
|-------------------|----------|----------|--------------|------------|----------|-----------------------|------------|----------|
| ARSD              | 7.09E-06 | -2.23411 | ---          | 5.41E-05   | -1.66718 | SLITRK6               | 0.00361859 | -1.63726 |
| MMP16             | 0.00041  | -2.22905 | PCMTD1       | 5.26E-05   | -1.66639 | ---                   | 0.0272352  | -1.637   |
| SLC5A3            | 2.04E-09 | -2.22895 | ---          | 4.69E-05   | -1.66634 | TMEM194               | 0.00030127 | -1.63649 |
| ---               | 2.94E-07 | -2.22889 | ---          | 0.0269615  | -1.66622 | ---                   | 0.00672629 | -1.63513 |
| PLP2              | 1.63E-08 | -2.2271  | ---          | 0.00060859 | -1.666   | PLEKHA6               | 0.00015641 | -1.63459 |
| PDCD4             | 4.89E-05 | -2.22614 | MAPKAP1      | 0.00123325 | -1.6656  | JAK1                  | 1.58E-06   | -1.6335  |
| NUSAP1            | 1.98E-08 | -2.22608 | MGC16121     | 1.75E-05   | -1.6656  | ---                   | 0.00373734 | -1.6335  |
| ASRGL1            | 1.20E-05 | -2.22512 | CDH26        | 0.00219383 | -1.66536 | LRRC23                | 0.00752961 | -1.63338 |
| C10orf33          | 2.49E-07 | -2.22428 | ---          | 0.00051002 | -1.66526 | SDC2                  | 4.26E-06   | -1.63325 |
| NFATC3            | 3.92E-05 | -2.22412 | ERBB3        | 0.00142348 | -1.66399 | AMMECR1               | 0.00031705 | -1.63312 |
| ---               | 5.82E-07 | -2.22377 | NSUN4        | 7.91E-05   | -1.66382 | KIFC1                 | 5.82E-06   | -1.63268 |
| C14orf143         | 3.10E-08 | -2.22208 | ---          | 0.00045863 | -1.66371 | UBE2G2                | 5.48E-05   | -1.63229 |
| E2F8              | 3.62E-07 | -2.22205 | ---          | 0.00217639 | -1.66263 | RTEL1                 | 0.00021268 | -1.63213 |
| WHSC1             | 5.99E-08 | -2.22203 | MKI67        | 3.23E-07   | -1.66238 | GLCCI1                | 2.64E-07   | -1.62997 |
| ING3              | 3.34E-06 | -2.2209  | DIP2C        | 8.99E-07   | -1.66218 | PPARD                 | 0.00105767 | -1.62949 |
| TSGA14            | 1.69E-07 | -2.22059 | GREB1        | 0.00197661 | -1.66129 | SMAD2                 | 0.00229267 | -1.62939 |
| MTSS1             | 0.00044  | -2.22013 | UHMK1        | 0.0025762  | -1.661   | FER1L3                | 1.59E-07   | -1.62922 |
| POMZP3 /// ZP3    | 1.65E-05 | -2.2198  | PLEKHA6      | 0.00012545 | -1.66077 | VTI1B                 | 2.58E-06   | -1.62868 |
| ATP2B4            | 0.00023  | -2.21949 | WWC1         | 1.07E-05   | -1.66076 | HDLBP                 | 3.34E-06   | -1.62866 |
| GPBR              | 2.81E-06 | -2.21896 | ERBB3        | 1.07E-08   | -1.66059 | ---                   | 0.00059828 | -1.62839 |
| TAF5              | 2.16E-08 | -2.21764 | LOC100130360 | 0.0120253  | -1.66045 | ---                   | 0.0354213  | -1.62815 |
| TNKS2             | 0.00012  | -2.21683 | ---          | 6.91E-05   | -1.65969 | C9orf100              | 0.00132529 | -1.62781 |
| C14orf130         | 2.24E-11 | -2.21621 | HELLS        | 4.14E-05   | -1.65968 | GNS                   | 5.82E-05   | -1.62727 |
| CBX6              | 7.79E-07 | -2.21538 | GDAP1        | 0.00031617 | -1.65852 | WEE1                  | 2.94E-05   | -1.62715 |
| BRCA2             | 2.53E-06 | -2.21531 | LRRC37A2     | 0.00069313 | -1.65836 | ---                   | 0.00144187 | -1.62712 |
| CDC2              | 3.34E-08 | -2.2153  | C2orf56      | 7.33E-05   | -1.65828 | ST6GALNAC2            | 8.07E-09   | -1.62681 |
| DBF4              | 7.83E-07 | -2.21483 | RTEL1        | 0.00017211 | -1.65743 | C2CD2                 | 9.66E-06   | -1.62635 |
| ---               | 3.08E-07 | -2.21353 | DKFZp547E087 | 6.75E-06   | -1.65649 | CBFB                  | 2.24E-06   | -1.62618 |
| TMCC1             | 1.05E-06 | -2.21324 | FAM102A      | 2.97E-06   | -1.65611 | ---                   | 0.00115025 | -1.62612 |
| GYG2              | 0.00042  | -2.21266 | DNAL1        | 3.91E-05   | -1.65602 | LOC440288             | 0.00017021 | -1.626   |
| PTAR1             | 0.00029  | -2.21241 | NRCAM        | 0.0001823  | -1.65589 | tcag7.1228            | 0.00296225 | -1.62487 |
| GAS2L3            | 1.63E-07 | -2.211   | KIAA1545     | 2.90E-05   | -1.6557  | MCM4                  | 7.54E-06   | -1.62439 |
| TNFAIP8L1         | 2.61E-05 | -2.20833 | ---          | 0.0024066  | -1.65569 | GLCCI1                | 0.00040233 | -1.62429 |
| ARSD              | 3.39E-06 | -2.20784 | HIST1H3E     | 5.20E-06   | -1.65553 | ZNF512                | 0.00266829 | -1.62361 |
| AURKA             | 1.12E-08 | -2.20774 | ---          | 0.00104934 | -1.65535 | ---                   | 0.0333757  | -1.6235  |
| TUSC3             | 0.00023  | -2.20713 | ---          | 0.0244426  | -1.65483 | PQLC3                 | 1.52E-07   | -1.62324 |
| FBXO17            | 0.00032  | -2.20699 | CACNG4       | 2.79E-05   | -1.65412 | MCM4                  | 0.00031983 | -1.62315 |
| RAPGEFL1          | 2.48E-06 | -2.20629 | ---          | 0.00010576 | -1.65381 | ---                   | 0.00428279 | -1.62284 |
| ---               | 1.04E-06 | -2.20627 | RMND5A       | 6.73E-07   | -1.65373 | HOXB7                 | 5.09E-05   | -1.62281 |
| RFC3              | 5.89E-09 | -2.20422 | EVL          | 6.01E-05   | -1.65363 | ALG9                  | 0.0141691  | -1.62273 |
| ESCO2             | 0.00029  | -2.20414 | PNMA2        | 0.00056469 | -1.65303 | THBS1                 | 1.55E-05   | -1.62225 |
| PVRL2             | 2.78E-05 | -2.20379 | ---          | 0.00031571 | -1.65234 | ---                   | 1.06E-05   | -1.62191 |
| TREX2 /// UCHL5IP | 2.22E-07 | -2.20361 | CNOT6        | 1.91E-06   | -1.65224 | ---                   | 0.0001091  | -1.62137 |
| CORO1B            | 2.95E-06 | -2.20306 | CXXC5        | 1.92E-07   | -1.65187 | TMEM19                | 0.00203766 | -1.62109 |
| RAD54B            | 2.29E-06 | -2.20298 | ---          | 0.00087215 | -1.65184 | SFRS7                 | 1.10E-05   | -1.62059 |
| ---               | 8.00E-06 | -2.20266 | TBX2         | 7.47E-07   | -1.65162 | C10orf6               | 8.23E-06   | -1.62043 |
| CORO1A            | 5.34E-06 | -2.20069 | SOX3         | 1.94E-05   | -1.65088 | E /// HIST1H2BF /// I | 1.99E-07   | -1.62007 |
| TPX2              | 1.18E-07 | -2.19954 | DCP2         | 9.43E-08   | -1.65069 | ---                   | 0.00014206 | -1.61965 |
| FANCM             | 0.0015   | -2.19807 | WDSOF1       | 0.00831156 | -1.65039 | ---                   | 0.00672123 | -1.61931 |

|          |          |          |                       |            |          |              |            |          |
|----------|----------|----------|-----------------------|------------|----------|--------------|------------|----------|
| WDR52    | 0.00054  | -2.19595 | ARNT                  | 0.00080553 | -1.6496  | ---          | 9.23E-05   | -1.61857 |
| CEP78    | 3.71E-08 | -2.19514 | ---                   | 1.77E-05   | -1.64915 | RASSF8       | 8.97E-06   | -1.61818 |
| EFNB3    | 3.18E-07 | -2.19509 | MICAL2                | 5.93E-06   | -1.64902 | EPHA4        | 0.00127514 | -1.61721 |
| KIF23    | 1.02E-06 | -2.19439 | HDLBP                 | 0.00039616 | -1.64883 | HIPK2        | 0.00300128 | -1.6171  |
| DHFR     | 1.52E-05 | -2.19302 | STARD13               | 0.00465255 | -1.64852 | GNA12        | 4.62E-07   | -1.6161  |
| H2AFY    | 4.02E-07 | -2.19287 | ---                   | 0.00173754 | -1.6485  | ---          | 0.0264398  | -1.61519 |
| PPM1F    | 2.14E-05 | -2.19283 | ---                   | 0.00390508 | -1.64818 | ---          | 0.0412269  | -1.61502 |
| CHAF1A   | 4.21E-07 | -2.19253 | ---                   | 0.00014642 | -1.64805 | LOC100128641 | 0.00013468 | -1.61483 |
| THBD     | 0.0008   | -2.19203 | FANCA                 | 1.32E-05   | -1.64776 | ---          | 0.00328534 | -1.61479 |
| PLK4     | 3.24E-05 | -2.19195 | SIDT1                 | 1.55E-05   | -1.64737 | PLOD2        | 7.41E-07   | -1.6144  |
| EPB41L1  | 0.0005   | -2.19082 | ---                   | 1.84E-05   | -1.6473  | ---          | 0.00070799 | -1.61409 |
| FBXO5    | 8.30E-08 | -2.18969 | ---                   | 1.82E-05   | -1.64725 | NOTCH2NL     | 8.41E-07   | -1.61358 |
| MTSS1    | 7.30E-07 | -2.18951 | ---                   | 0.00024484 | -1.64668 | OTUD4        | 0.00039693 | -1.61264 |
| METTL3   | 1.29E-05 | -2.18908 | ---                   | 8.02E-07   | -1.64627 | MLL          | 0.00064767 | -1.61107 |
| FNIP2    | 2.95E-06 | -2.18543 | ZNF512                | 0.00227806 | -1.64534 | ---          | 3.43E-06   | -1.61101 |
| CLPB     | 0.00206  | -2.18531 | MTHFD1                | 0.00060233 | -1.64493 | ESR1         | 0.00677902 | -1.6108  |
| POGK     | 1.49E-08 | -2.18493 | KIF14                 | 0.00103699 | -1.64486 | IQGAP3       | 0.00592608 | -1.61027 |
| PRPF38A  | 2.00E-06 | -2.18487 | ---                   | 0.00013991 | -1.64485 | ---          | 9.59E-05   | -1.60985 |
| FANCC    | 0.0001   | -2.18253 | NPAL2                 | 9.94E-07   | -1.64421 | ---          | 7.22E-05   | -1.60953 |
| ARSD     | 1.05E-06 | -2.18046 | LRRFIP1               | 3.33E-05   | -1.64374 | CXXC5        | 1.61E-08   | -1.60945 |
| KIF23    | 1.64E-06 | -2.18018 | PCGF3                 | 1.95E-08   | -1.64372 | tcag7.1228   | 0.00089433 | -1.6094  |
| PCDH19   | 4.22E-08 | -2.17996 | ---                   | 0.00010103 | -1.64343 | ---          | 0.0175095  | -1.6093  |
| RASA2    | 1.21E-07 | -2.17991 | RREB1                 | 0.00412582 | -1.64328 | CDK2         | 0.00017999 | -1.60905 |
| CDH18    | 9.05E-10 | -2.17808 | tcag7.1228            | 8.87E-08   | -1.6432  | ---          | 0.00034232 | -1.60861 |
| PRC1     | 9.84E-08 | -2.17734 | USP34                 | 0.00154975 | -1.64304 | ---          | 0.00673431 | -1.60859 |
| RICS     | 0.0001   | -2.17677 | ---                   | 0.00014837 | -1.64278 | WHSC1        | 3.31E-06   | -1.60829 |
| MCM3     | 3.16E-10 | -2.17592 | SMARCA2               | 3.91E-05   | -1.64184 | CNOT6        | 2.91E-06   | -1.60817 |
| ZBED1    | 0.00026  | -2.17484 | AMOTL1                | 0.00010284 | -1.64154 | LOC283508    | 2.11E-05   | -1.608   |
| FXC1     | 6.15E-06 | -2.17228 | CD99                  | 1.52E-07   | -1.64148 | NUPL1        | 0.00027817 | -1.60772 |
| CDC2     | 6.44E-06 | -2.17123 | ATL3                  | 5.70E-05   | -1.64138 | USP21        | 0.00027532 | -1.60693 |
| FBXO5    | 4.11E-07 | -2.17054 | ---                   | 0.00022185 | -1.64138 | DTL          | 0.00011316 | -1.60684 |
| PLK4     | 6.04E-05 | -2.17033 | ---                   | 1.69E-07   | -1.64078 | FANCD2       | 9.59E-06   | -1.60645 |
| KIAA1704 | 4.36E-05 | -2.17    | ZNF160                | 0.00160082 | -1.64035 | TMPO         | 0.00066374 | -1.60606 |
| ---      | 0.00257  | -2.16977 | C6orf89               | 3.75E-05   | -1.64032 | C10orf33     | 1.34E-05   | -1.60606 |
| C15orf42 | 8.55E-08 | -2.16962 | ---                   | 0.00442875 | -1.63904 | TBX2         | 1.17E-06   | -1.60557 |
| RHOF     | 0.00016  | -2.16951 | FLJ20464              | 0.00561998 | -1.63866 | ---          | 0.00023041 | -1.60546 |
| PALM3    | 0.00314  | -2.16847 | MKI67                 | 4.88E-05   | -1.63696 | GMNN         | 5.13E-08   | -1.60544 |
| REPS2    | 0.00058  | -2.16781 | NUP62                 | 0.00093    | -1.63669 | SDHALP1      | 0.00031079 | -1.60437 |
| RECQL4   | 1.65E-06 | -2.16746 | SLC9A2                | 0.00093185 | -1.63662 | RNF44        | 1.38E-07   | -1.6039  |
| ATAD2    | 8.61E-09 | -2.1661  | STAG3L1               | 0.0001656  | -1.6366  | ---          | 0.00250494 | -1.60368 |
| ---      | 0.00017  | -2.16562 | UBE2G2                | 7.40E-05   | -1.63518 | PPP2R2A      | 2.37E-07   | -1.60307 |
| OLFML2A  | 9.04E-05 | -2.16475 | ---                   | 0.0565318  | -1.63495 | WEE1         | 3.93E-06   | -1.60189 |
| C21orf45 | 1.33E-05 | -2.16384 | IA4 /// UGT1A5 /// UC | 0.00167729 | -1.6345  | UBE2G2       | 1.01E-08   | -1.60177 |
| FPGT     | 5.13E-05 | -2.16293 | DHTKD1                | 3.21E-05   | -1.63443 | WDR40A       | 3.34E-07   | -1.6011  |
| GNPTAB   | 3.79E-07 | -2.16265 | VTI1B                 | 2.45E-06   | -1.63428 | ---          | 0.00028622 | -1.60067 |
| SYTL5    | 1.22E-08 | -2.16245 | CAPRIN2               | 0.00134492 | -1.63416 | SMC1A        | 2.14E-05   | -1.60043 |
| WHSC1    | 1.70E-08 | -2.1622  | GNA14                 | 3.51E-05   | -1.63341 | LOC645722    | 8.41E-07   | -1.59885 |
| CCNF     | 4.37E-06 | -2.16154 | WDR59                 | 0.00336851 | -1.63281 | ---          | 0.00039281 | -1.59863 |
| ZNF496   | 1.16E-07 | -2.16137 | TRAF5                 | 0.00019942 | -1.63222 | C2orf56      | 0.00012436 | -1.59856 |

|           |          |          |                       |            |          |              |            |          |
|-----------|----------|----------|-----------------------|------------|----------|--------------|------------|----------|
| HNRNPH1   | 4.94E-05 | -2.16083 | ---                   | 0.0438964  | -1.63095 | HELLS        | 5.29E-06   | -1.59836 |
| C4orf19   | 5.81E-06 | -2.16    | ---                   | 0.00382062 | -1.63036 | ---          | 0.0512034  | -1.59835 |
| PTTG1     | 1.07E-08 | -2.1599  | ---                   | 6.12E-06   | -1.62993 | ---          | 0.00018672 | -1.59827 |
| AURKA     | 1.62E-08 | -2.15901 | PPP3R1 /// WDR92      | 7.76E-06   | -1.6298  | ---          | 0.0255934  | -1.59795 |
| GAS2L1    | 1.87E-07 | -2.15683 | C2orf12               | 5.68E-06   | -1.62944 | ---          | 2.76E-05   | -1.59784 |
| ZNF367    | 4.24E-06 | -2.15659 | ---                   | 0.00032119 | -1.62944 | ACVR2B       | 0.00031063 | -1.59781 |
| PPP2R1B   | 2.78E-06 | -2.15579 | LOC254128             | 0.00041041 | -1.62932 | ---          | 1.44E-05   | -1.59724 |
| PLEKHB2   | 4.10E-09 | -2.15546 | KLHL4                 | 0.018714   | -1.62927 | MCM7         | 7.05E-06   | -1.59575 |
| C3orf63   | 0.00012  | -2.15383 | FRMD4A                | 5.08E-05   | -1.6292  | ---          | 8.79E-06   | -1.59552 |
| CCNB2     | 1.53E-08 | -2.15303 | IGF2                  | 0.0237727  | -1.62897 | ZNF275       | 0.00352859 | -1.5952  |
| ---       | 4.67E-05 | -2.15301 | KCNK5                 | 0.0124318  | -1.6285  | NFIC         | 4.87E-05   | -1.59428 |
| PGR       | 4.33E-08 | -2.15238 | TBX2                  | 7.63E-08   | -1.62629 | LYN          | 0.00078446 | -1.59421 |
| B3GALTL   | 0.00012  | -2.15059 | PHF10                 | 0.00020485 | -1.62611 | CD99         | 4.65E-08   | -1.59374 |
| NXP3      | 0.00032  | -2.15025 | TFAP2A                | 1.10E-05   | -1.62581 | CENPI        | 8.01E-05   | -1.59306 |
| ---       | 1.37E-05 | -2.14904 | GAS2L3                | 0.00058434 | -1.62568 | CLCC1        | 0.00074978 | -1.59283 |
| TIMP2     | 1.99E-05 | -2.14889 | JAK1                  | 0.0001284  | -1.62542 | ALS2CR13     | 0.0303364  | -1.59228 |
| CDK2      | 1.90E-07 | -2.14789 | NTN1                  | 0.0180284  | -1.6252  | ---          | 1.85E-05   | -1.59208 |
| RSBN1L    | 1.53E-07 | -2.1452  | ---                   | 4.88E-06   | -1.6247  | BNIP3L       | 9.65E-07   | -1.59196 |
| TIGD7     | 8.94E-06 | -2.14436 | WFS1                  | 1.02E-05   | -1.62397 | LOC100128191 | 0.00048803 | -1.59087 |
| ---       | 0.00096  | -2.14427 | FOSL2                 | 0.00370256 | -1.62331 | CDCA2        | 0.0002134  | -1.59037 |
| MYCBP     | 0.00147  | -2.14409 | ABCA5                 | 0.00856581 | -1.6233  | CENTD1       | 3.55E-05   | -1.59029 |
| DHTKD1    | 1.80E-07 | -2.14404 | MLL3                  | 1.13E-05   | -1.62311 | BICD2        | 4.14E-05   | -1.59023 |
| MARCKS    | 5.34E-06 | -2.14293 | ---                   | 0.00019605 | -1.62092 | SEMA3C       | 9.42E-05   | -1.59008 |
| LOC284952 | 1.39E-05 | -2.14277 | KIAA0494              | 8.12E-07   | -1.62084 | MCM7         | 1.15E-06   | -1.58993 |
| RBM8A     | 1.04E-09 | -2.14262 | NEBL                  | 1.35E-07   | -1.6207  | ZAK          | 5.26E-06   | -1.58979 |
| DENND1A   | 0.00149  | -2.14239 | ---                   | 0.00024053 | -1.62044 | USP40        | 0.0012852  | -1.58975 |
| STIL      | 2.44E-07 | -2.14119 | LRRC50                | 0.00035119 | -1.61997 | ---          | 0.00226822 | -1.58937 |
| ---       | 2.03E-06 | -2.14064 | VAPB                  | 3.87E-07   | -1.61974 | SLC36A1      | 8.19E-05   | -1.58889 |
| ALDH6A1   | 3.95E-06 | -2.14008 | HNRNPA3               | 1.50E-05   | -1.61756 | C20orf121    | 1.98E-05   | -1.58859 |
| ---       | 0.00027  | -2.14005 | C13orf18 /// LOC72897 | 0.0442175  | -1.61683 | DHFR         | 0.00061018 | -1.58852 |
| FAM120AOS | 8.20E-07 | -2.13935 | ---                   | 0.00063087 | -1.61665 | LOC285382    | 0.0825515  | -1.58821 |
| CHTF18    | 1.68E-08 | -2.13873 | ATP2A2                | 3.86E-05   | -1.6163  | GJB3         | 0.014036   | -1.58818 |
| MCM10     | 1.42E-08 | -2.1387  | ---                   | 0.00015009 | -1.61613 | MTR          | 2.14E-06   | -1.58787 |
| FANCI     | 2.06E-06 | -2.13808 | ---                   | 0.034792   | -1.61579 | DST          | 1.75E-07   | -1.5878  |
| SNX1      | 8.11E-06 | -2.13799 | ---                   | 0.00034798 | -1.61529 | CACNG4       | 5.16E-05   | -1.58751 |
| ---       | 2.07E-07 | -2.1378  | RAD51L1               | 0.00125277 | -1.61493 | CDK6         | 5.59E-05   | -1.58706 |
| DCLRE1B   | 3.12E-09 | -2.1356  | PSIP1                 | 3.79E-06   | -1.61486 | MLLT10       | 0.00045098 | -1.58661 |
| KIAA0841  | 4.48E-07 | -2.1345  | DYNC1L12              | 1.20E-07   | -1.61478 | ZNF551       | 0.00012798 | -1.58588 |
| LOC56757  | 2.26E-05 | -2.13352 | ---                   | 0.0259433  | -1.61475 | NCAPG        | 9.83E-05   | -1.58546 |
| MXD3      | 5.98E-05 | -2.13334 | GPR158                | 0.0519427  | -1.61375 | UBE2G2       | 0.00011766 | -1.58465 |
| CDCA3     | 8.60E-07 | -2.13281 | MALAT1                | 0.0554964  | -1.61334 | FOS          | 0.00015908 | -1.58419 |
| GGH       | 4.71E-07 | -2.1323  | ---                   | 1.92E-06   | -1.61315 | HIST1H3H     | 5.59E-07   | -1.58413 |
| PLXNB3    | 0.00019  | -2.13103 | ASPM                  | 0.00460173 | -1.61309 | RPS15A       | 0.00068257 | -1.58411 |
| LMBR1     | 7.81E-08 | -2.13014 | ---                   | 0.00701473 | -1.61299 | RB1          | 0.00033261 | -1.58386 |
| FAM83D    | 2.66E-07 | -2.12946 | CFDP1                 | 7.45E-05   | -1.61275 | FANCM        | 0.0249396  | -1.58287 |
| TSPAN9    | 3.47E-05 | -2.1292  | ---                   | 0.00049086 | -1.61259 | ZNF789       | 0.00181587 | -1.58186 |
| H2AFX     | 0.00079  | -2.12905 | AKAP13                | 0.00262463 | -1.61157 | ZNF37A       | 5.78E-05   | -1.58181 |
| NUP210    | 3.46E-07 | -2.1288  | C4orf34               | 0.00135446 | -1.61152 | MKI67        | 6.06E-06   | -1.58157 |
| RDH5      | 1.26E-06 | -2.12805 | MAP3K1                | 0.0318421  | -1.61016 | MAPKAP1      | 0.00235455 | -1.58132 |

|                   |          |          |           |            |          |                     |            |          |
|-------------------|----------|----------|-----------|------------|----------|---------------------|------------|----------|
| LRRC8A            | 1.50E-07 | -2.12794 | ---       | 0.00340306 | -1.61002 | MRS2                | 0.00345217 | -1.58114 |
| MCM6              | 1.20E-10 | -2.12618 | ---       | 0.0343154  | -1.60956 | CEP110              | 0.00977388 | -1.58041 |
| RTTN              | 2.14E-05 | -2.12606 | ---       | 4.82E-05   | -1.60837 | TROAP               | 2.48E-06   | -1.58009 |
| GLI3              | 2.04E-05 | -2.12562 | WHSC1     | 3.47E-06   | -1.6082  | FXR2                | 0.0398618  | -1.57976 |
| TK1               | 2.70E-10 | -2.12346 | ---       | 0.0008688  | -1.60813 | DICER1              | 0.00078395 | -1.57956 |
| CCDC85A           | 0.00011  | -2.1227  | QKI       | 0.0007727  | -1.60771 | ---                 | 0.00163043 | -1.57945 |
| ---               | 0.0007   | -2.1218  | DEPDC1    | 0.00011706 | -1.60682 | ---                 | 0.00673903 | -1.57941 |
| CDC14B /// CDC14C | 0.00056  | -2.1215  | ---       | 0.00017476 | -1.60673 | CHAF1A              | 2.51E-05   | -1.57936 |
| PRIM1             | 4.93E-08 | -2.12141 | PDLIM1    | 1.03E-07   | -1.6067  | KLHDC4              | 6.62E-05   | -1.5792  |
| RAB22A            | 8.60E-08 | -2.12109 | ---       | 6.72E-06   | -1.60646 | LMBR1               | 3.13E-06   | -1.57907 |
| 7A5               | 0.00289  | -2.12002 | ZNF275    | 0.00586434 | -1.60507 | RECQL4              | 0.00029658 | -1.57867 |
| GINS3             | 1.23E-07 | -2.11993 | IGSF3     | 0.0425853  | -1.60437 | SPC24               | 0.00347549 | -1.57824 |
| PLEKHH2           | 0.00976  | -2.11988 | BMPR1B    | 0.00016171 | -1.60429 | ---                 | 0.0299149  | -1.57802 |
| CORO1C            | 3.60E-07 | -2.11982 | MAPT      | 0.0001034  | -1.60418 | ---                 | 0.0179072  | -1.57772 |
| ---               | 6.79E-05 | -2.11979 | ---       | 0.00016062 | -1.60418 | ---                 | 0.00700127 | -1.57771 |
| EPHA7             | 6.26E-05 | -2.11917 | ---       | 3.59E-05   | -1.60384 | ---                 | 3.39E-05   | -1.57768 |
| ATAD2             | 8.26E-06 | -2.11873 | BRIP1     | 0.00059957 | -1.60357 | SMC4                | 7.28E-08   | -1.5776  |
| PCDHB10           | 0.00092  | -2.11823 | DIP2C     | 1.39E-06   | -1.60294 | ASPM                | 5.09E-05   | -1.57739 |
| RFC4              | 5.17E-09 | -2.11804 | ERBB3     | 7.97E-08   | -1.60266 | LMBR1               | 3.89E-06   | -1.57736 |
| GPSM2             | 4.29E-07 | -2.11777 | ---       | 7.27E-05   | -1.60265 | RECQL4              | 8.34E-05   | -1.57636 |
| DUT               | 2.58E-08 | -2.11715 | LOC440348 | 4.77E-07   | -1.60261 | LOC643988           | 3.13E-05   | -1.57633 |
| C9orf58           | 5.21E-08 | -2.11589 | CXorf24   | 0.00394758 | -1.60244 | ---                 | 0.00032717 | -1.57613 |
| CTSK              | 6.14E-07 | -2.11585 | UGCG      | 1.62E-07   | -1.60133 | /// NBPF15 /// NBPF | 3.05E-05   | -1.57577 |
| ---               | 8.08E-05 | -2.11473 | TPBG      | 2.21E-08   | -1.60125 | DHFR                | 1.58E-05   | -1.57575 |
| ANP32E            | 1.56E-06 | -2.11409 | ---       | 0.00994583 | -1.60113 | FLJ41757            | 0.021195   | -1.57551 |
| ZWILCH            | 2.58E-08 | -2.11341 | ---       | 0.0251616  | -1.60097 | WHSC1               | 3.91E-05   | -1.57462 |
| ECT2              | 3.23E-06 | -2.11238 | ---       | 0.0025682  | -1.60045 | JOSD1               | 0.00105915 | -1.57461 |
| FEN1              | 2.76E-08 | -2.11195 | ---       | 0.00134715 | -1.59977 | ATP7A               | 0.00249009 | -1.57454 |
| C21orf86          | 3.52E-05 | -2.11154 | PPIA      | 6.53E-08   | -1.59918 | LOC400236           | 0.00219793 | -1.57445 |
| ---               | 1.16E-06 | -2.1114  | ---       | 7.29E-06   | -1.59667 | CNPY3               | 0.0485789  | -1.57441 |
| ---               | 1.08E-06 | -2.10948 | ---       | 0.00030866 | -1.59649 | EP400               | 0.00017626 | -1.57376 |
| KIAA1324          | 1.25E-07 | -2.10934 | C6orf141  | 9.17E-06   | -1.59643 | FBXO9               | 0.00263851 | -1.57373 |
| ANKIB1            | 6.71E-10 | -2.10831 | FAM113A   | 1.13E-06   | -1.59635 | ---                 | 0.00453661 | -1.57354 |
| LGALS1            | 7.64E-08 | -2.10828 | ---       | 1.57E-06   | -1.59535 | HIRIP3              | 0.00014813 | -1.57314 |
| SH3PXD2B          | 1.40E-06 | -2.10732 | C10orf2   | 0.00234077 | -1.59516 | NUP62               | 0.00156302 | -1.57303 |
| RAB31             | 5.15E-09 | -2.10721 | ARL17     | 0.00028498 | -1.59416 | MCM3APAS            | 0.00461227 | -1.57256 |
| ---               | 0.00073  | -2.10561 | PMS2L2    | 0.00018312 | -1.59344 | TncRNA              | 1.32E-06   | -1.57243 |
| TMEM18            | 0.00119  | -2.10524 | TTLL5     | 0.00133737 | -1.59278 | C20orf177           | 5.21E-06   | -1.57169 |
| CDC2              | 9.77E-10 | -2.10521 | ---       | 2.17E-06   | -1.59268 | TMCO1               | 9.23E-06   | -1.57159 |
| ---               | 1.37E-05 | -2.1042  | ---       | 5.65E-05   | -1.59246 | FDFT1               | 0.00065783 | -1.57115 |
| MCM7              | 2.01E-07 | -2.10366 | BTBD3     | 0.00015065 | -1.59212 | CHTF18              | 9.76E-07   | -1.57079 |
| ---               | 0.00048  | -2.10325 | ULK1      | 2.52E-07   | -1.59194 | ZNF548              | 0.00380677 | -1.57063 |
| GPSM2             | 5.20E-07 | -2.09962 | PCBP2     | 9.16E-06   | -1.59189 | ---                 | 0.0056096  | -1.57054 |
| ---               | 0.01555  | -2.09733 | ---       | 0.0195005  | -1.59132 | CIT                 | 7.36E-05   | -1.57037 |
| APITD1            | 1.26E-06 | -2.09626 | ---       | 0.00566275 | -1.59076 | UGCG                | 2.25E-07   | -1.5703  |
| HCRP1             | 8.28E-05 | -2.0914  | UBE2G2    | 1.14E-08   | -1.59057 | ---                 | 0.00541344 | -1.56984 |
| PPP2R2C           | 2.23E-07 | -2.0913  | C14orf94  | 0.00015691 | -1.59051 | CDK5RAP2            | 0.00010738 | -1.56943 |
| DDX11             | 1.90E-07 | -2.09049 | NRIP1     | 5.50E-07   | -1.58997 | CDK6                | 0.00948095 | -1.56932 |
| ---               | 0.00052  | -2.09033 | ---       | 0.041648   | -1.58993 | ---                 | 0.00071884 | -1.5691  |

|                      |          |          |                     |            |          |                    |            |          |
|----------------------|----------|----------|---------------------|------------|----------|--------------------|------------|----------|
| CEP55                | 7.31E-08 | -2.08979 | ---                 | 4.17E-05   | -1.5891  | ANK3               | 1.49E-06   | -1.56898 |
| ---                  | 5.25E-05 | -2.08795 | GFRA1               | 3.99E-09   | -1.58871 | TFF3               | 4.45E-06   | -1.56832 |
| ---                  | 0.00042  | -2.08784 | KIAA1333            | 2.90E-06   | -1.58833 | CKAP2L             | 0.00076428 | -1.56777 |
| PTPLAD1              | 1.75E-08 | -2.08546 | SLC7A2              | 0.0008096  | -1.58822 | FRYL               | 0.0116128  | -1.56768 |
| 1 /// DDX12 /// LOC6 | 2.92E-06 | -2.08525 | ---                 | 0.00011886 | -1.58818 | ---                | 4.61E-05   | -1.56748 |
| POLA2                | 5.90E-07 | -2.0852  | CAPN8 /// LOC644151 | 1.30E-05   | -1.58761 | KIAA1553           | 6.11E-06   | -1.56739 |
| ACSS3                | 5.72E-05 | -2.08509 | ---                 | 0.00017922 | -1.58754 | ---                | 0.00040304 | -1.56687 |
| MECP2                | 7.41E-06 | -2.08498 | HS3ST3A1            | 7.66E-05   | -1.58734 | OSBPL2             | 0.0017944  | -1.5666  |
| TMEM14A              | 1.08E-08 | -2.08387 | USP31               | 0.00648258 | -1.58702 | C6orf89            | 7.55E-05   | -1.56651 |
| SERBP1               | 3.34E-05 | -2.08117 | LOC645722           | 7.02E-06   | -1.5867  | ---                | 0.00552539 | -1.56647 |
| ARHGAP29             | 1.35E-07 | -2.08086 | ---                 | 8.39E-05   | -1.58614 | ---                | 0.00097243 | -1.56642 |
| ATRNL1               | 2.98E-07 | -2.08013 | WDR61               | 2.60E-08   | -1.58586 | FAM111A            | 7.89E-07   | -1.56565 |
| ZWILCH               | 6.35E-07 | -2.07958 | ---                 | 0.00226846 | -1.58465 | FRMD4A             | 0.00108262 | -1.56554 |
| PTBP1                | 1.49E-07 | -2.07953 | ---                 | 0.0752549  | -1.58453 | DVL2               | 7.27E-05   | -1.56553 |
| NUP50                | 9.04E-08 | -2.07951 | FOS                 | 0.0001588  | -1.58438 | TFDP1              | 0.00013863 | -1.56533 |
| SMC4                 | 7.60E-08 | -2.07929 | UGCG                | 4.50E-05   | -1.58434 | NFATC2IP           | 1.11E-08   | -1.56515 |
| SALL2                | 0.00015  | -2.07882 | ---                 | 5.21E-06   | -1.58421 | ---                | 0.0181949  | -1.56512 |
| ARSD                 | 1.05E-05 | -2.07868 | DAAM1               | 2.02E-05   | -1.58395 | TPM1               | 0.00167417 | -1.56486 |
| PLAGL2               | 0.00012  | -2.07799 | SF1                 | 0.0121132  | -1.5833  | ---                | 0.0176225  | -1.56439 |
| ---                  | 1.04E-06 | -2.07532 | C6orf89             | 2.44E-06   | -1.58302 | FAM111B            | 0.00219013 | -1.5643  |
| SGOL1                | 8.91E-05 | -2.07522 | ---                 | 0.0057229  | -1.58262 | WSB1               | 6.11E-06   | -1.5643  |
| ---                  | 1.04E-05 | -2.0752  | ---                 | 1.55E-05   | -1.58234 | BSPRY              | 3.73E-05   | -1.56384 |
| MARCKS               | 3.12E-07 | -2.07426 | ---                 | 0.00235659 | -1.58155 | HOXB7              | 0.00016764 | -1.56365 |
| C21orf45             | 7.55E-06 | -2.07394 | FAM119B             | 0.00077415 | -1.58137 | ZNF462             | 4.89E-05   | -1.56307 |
| GLIS2                | 1.96E-06 | -2.07382 | ---                 | 0.0157986  | -1.58134 | C100130862 /// TRA | 9.51E-07   | -1.56269 |
| CAPRIN1              | 2.05E-07 | -2.07355 | SBK1                | 5.25E-06   | -1.58133 | KIAA1833           | 0.00070688 | -1.56214 |
| SEMA6A               | 6.46E-07 | -2.07288 | C20orf177           | 4.72E-06   | -1.58121 | NPR3               | 0.00159076 | -1.56206 |
| ---                  | 0.00151  | -2.07101 | ---                 | 0.111317   | -1.5811  | MYC                | 3.95E-06   | -1.56146 |
| ZNF473               | 0.00073  | -2.07082 | DST                 | 0.00493672 | -1.58106 | SYK                | 0.0179965  | -1.56109 |
| TNKS2                | 9.78E-08 | -2.07081 | ---                 | 0.00128885 | -1.58093 | NOLC1              | 5.32E-06   | -1.56107 |
| DHFR                 | 1.68E-07 | -2.07015 | GUSBP1              | 1.76E-07   | -1.58083 | LOC147727          | 0.00015483 | -1.56104 |
| SFPQ                 | 2.93E-07 | -2.06982 | CD99                | 5.34E-08   | -1.58078 | TBX2               | 1.52E-07   | -1.56087 |
| SHCBP1               | 7.79E-06 | -2.06875 | GALNT10             | 0.0327067  | -1.57928 | ---                | 0.0106255  | -1.56082 |
| LOC440288            | 9.52E-06 | -2.06652 | ROD1                | 0.00042586 | -1.57886 | ULK1               | 3.53E-07   | -1.5607  |
| EFHC1                | 1.42E-06 | -2.06639 | EFEMP1              | 3.35E-06   | -1.57885 | DPP7               | 7.59E-05   | -1.56026 |
| TMEM83               | 5.70E-07 | -2.06615 | NR2F2               | 0.00185339 | -1.57877 | FERMT2             | 2.08E-05   | -1.55976 |
| IKBKB                | 8.28E-06 | -2.06589 | DKFZp547E087        | 8.37E-06   | -1.57873 | STAG3L1            | 0.00033266 | -1.55969 |
| ---                  | 0.00078  | -2.06447 | ---                 | 0.00176166 | -1.57858 | EP400              | 3.24E-06   | -1.5594  |
| CENPO                | 2.51E-07 | -2.06236 | FAM111A             | 6.93E-07   | -1.57759 | USP22              | 0.0008266  | -1.55937 |
| PTBP1                | 4.82E-09 | -2.06194 | CDCA7               | 6.06E-05   | -1.57748 | ---                | 0.00907961 | -1.55904 |
| ---                  | 0.0012   | -2.06177 | FIGN                | 0.0349549  | -1.57667 | WDR4               | 1.11E-05   | -1.5588  |
| C14orf106            | 7.86E-06 | -2.06082 | FBXO17              | 0.00873731 | -1.57612 | ---                | 0.00014335 | -1.55872 |
| METTL4               | 6.48E-06 | -2.06042 | MCM3APAS            | 0.00155678 | -1.57489 | SRRM2              | 9.39E-06   | -1.55844 |
| LMBR1                | 5.48E-08 | -2.05984 | ---                 | 0.0415433  | -1.57475 | ---                | 0.00661425 | -1.5583  |
| SYK                  | 9.85E-05 | -2.05929 | E2F2                | 0.00185206 | -1.57467 | ---                | 0.00057181 | -1.55783 |
| CBL                  | 1.38E-05 | -2.05864 | ---                 | 0.00081527 | -1.57375 | CHAF1A             | 0.0005244  | -1.55774 |
| MPHOSPH9             | 1.83E-06 | -2.05815 | ---                 | 0.015333   | -1.57374 | NSUN4              | 0.00020753 | -1.55763 |
| RET                  | 1.72E-07 | -2.0574  | NASP                | 1.96E-06   | -1.57367 | IGSF3              | 0.0539003  | -1.55754 |
| CCND3                | 1.35E-05 | -2.05718 | ---                 | 3.54E-05   | -1.57327 | ---                | 0.00139665 | -1.55749 |

|          |          |          |                      |            |          |           |            |          |
|----------|----------|----------|----------------------|------------|----------|-----------|------------|----------|
| ---      | 2.76E-06 | -2.05631 | KCNMB4               | 4.85E-05   | -1.57326 | HECW2     | 0.0117174  | -1.55686 |
| PVRL2    | 9.19E-05 | -2.05363 | C9orf100             | 0.00206116 | -1.57285 | IGF2      | 0.035494   | -1.55683 |
| RAB27A   | 3.03E-09 | -2.05349 | DST                  | 9.87E-07   | -1.57181 | NFATC2IP  | 2.09E-05   | -1.5567  |
| IGSF1    | 0.00172  | -2.05149 | NUP62                | 0.00021383 | -1.57169 | ABHD2     | 9.11E-06   | -1.55576 |
| PREX1    | 1.84E-09 | -2.05132 | ---                  | 6.96E-06   | -1.57136 | RC3H2     | 1.37E-06   | -1.55529 |
| ---      | 0.00097  | -2.0509  | ATP7A                | 0.00255871 | -1.57122 | ---       | 0.015564   | -1.55477 |
| ---      | 0.00022  | -2.0503  | DLG5                 | 3.54E-07   | -1.57113 | SFRS11    | 0.00357237 | -1.55408 |
| KLHDC4   | 2.35E-06 | -2.04992 | PPM1H                | 0.0251321  | -1.57064 | PCGF3     | 5.02E-08   | -1.55396 |
| IMMP1L   | 3.09E-05 | -2.04987 | 00134282 /// LOC1001 | 2.50E-08   | -1.5706  | ARL6IP1   | 6.36E-08   | -1.55394 |
| C16orf75 | 5.23E-09 | -2.04891 | KATNB1               | 0.0259382  | -1.56902 | ---       | 0.0026835  | -1.55367 |
| LRRC16A  | 5.90E-06 | -2.04851 | FKBP5                | 2.74E-05   | -1.56848 | NFIB      | 0.0132625  | -1.55366 |
| C9orf40  | 2.59E-05 | -2.0485  | LMCD1                | 5.13E-05   | -1.56823 | NHLRC3    | 0.00022248 | -1.55328 |
| ATP11C   | 4.35E-07 | -2.04694 | PSIP1                | 7.71E-07   | -1.56795 | ---       | 0.00483382 | -1.55322 |
| CAPG     | 4.55E-06 | -2.04648 | ZNF462               | 4.66E-05   | -1.56773 | C9orf102  | 0.0140452  | -1.55321 |
| ---      | 4.63E-05 | -2.04507 | ---                  | 7.66E-05   | -1.56752 | GALNT10   | 0.0381522  | -1.55183 |
| PTBP1    | 4.90E-08 | -2.04486 | ---                  | 0.00180935 | -1.56712 | FGF11     | 0.0120011  | -1.55157 |
| E2F1     | 0.00053  | -2.0446  | KIAA0101             | 4.49E-05   | -1.56672 | MPPED2    | 0.0249527  | -1.55154 |
| MT1F     | 0.00011  | -2.04403 | ADD3                 | 3.07E-05   | -1.56668 | JMJD1C    | 0.0706287  | -1.55144 |
| UBE2J1   | 3.51E-07 | -2.04342 | POLR2J4              | 4.34E-06   | -1.5666  | PEG10     | 0.0180748  | -1.55137 |
| CDC2     | 1.34E-07 | -2.04302 | C9orf130             | 0.00187235 | -1.56627 | TES       | 1.04E-05   | -1.55097 |
| TFDP2    | 2.90E-05 | -2.04286 | ---                  | 9.22E-05   | -1.56538 | UBE2N     | 4.14E-05   | -1.55091 |
| MAFB     | 4.09E-09 | -2.04283 | ANKRD35              | 0.00018946 | -1.56538 | GDAP1     | 0.00042431 | -1.5509  |
| MYEF2    | 1.23E-06 | -2.0428  | CNPY3                | 0.0509294  | -1.56513 | ---       | 0.00062467 | -1.55062 |
| S100BPB  | 6.82E-06 | -2.04216 | SNX24                | 9.48E-05   | -1.56486 | PAQR8     | 0.0346362  | -1.55027 |
| WHSC1    | 1.33E-06 | -2.04205 | ---                  | 0.0124093  | -1.56475 | RBM15B    | 0.00075063 | -1.55012 |
| HADH     | 1.29E-07 | -2.04167 | DNAL1                | 0.00388355 | -1.56473 | ---       | 0.00340376 | -1.55002 |
| MCM10    | 0.00015  | -2.04166 | ATF7IP2              | 9.52E-06   | -1.56423 | WDR61     | 5.79E-05   | -1.54994 |
| TYMS     | 0.00351  | -2.04057 | WASF2                | 1.55E-05   | -1.56405 | SFMBT1    | 0.0004823  | -1.54974 |
| E2F5     | 8.30E-07 | -2.03941 | ---                  | 0.00076629 | -1.564   | PDLIM5    | 0.00428942 | -1.54973 |
| PPP1R1C  | 3.16E-06 | -2.03877 | ---                  | 0.0170723  | -1.56382 | WDR68     | 7.86E-08   | -1.54969 |
| STMN1    | 5.00E-06 | -2.03819 | LOC283508            | 3.31E-05   | -1.5632  | RBBP9     | 0.0179724  | -1.54965 |
| PTPLAD1  | 2.25E-08 | -2.03797 | ---                  | 0.0102489  | -1.56272 | KIAA1267  | 0.00026557 | -1.5495  |
| TBC1D2B  | 4.36E-06 | -2.03768 | ---                  | 0.00364421 | -1.56244 | LOC143381 | 5.23E-08   | -1.54903 |
| FREQ     | 2.13E-05 | -2.03745 | ERC1                 | 0.00330636 | -1.56238 | PDLIM1    | 1.94E-07   | -1.54896 |
| CEP78    | 5.60E-07 | -2.03707 | CEACAM5              | 7.14E-07   | -1.56229 | ---       | 6.23E-05   | -1.54886 |
| PTBP1    | 1.61E-08 | -2.03529 | NHSL1                | 6.39E-06   | -1.56224 | ---       | 3.72E-05   | -1.54877 |
| MGC2752  | 1.89E-05 | -2.03477 | PHACTR4              | 5.27E-05   | -1.56165 | LRRFIP1   | 0.00108592 | -1.54866 |
| TMTC1    | 6.89E-07 | -2.03456 | ---                  | 0.00085683 | -1.56159 | UHRF1     | 1.16E-05   | -1.54789 |
| IPP      | 1.54E-05 | -2.034   | DPP7                 | 7.52E-05   | -1.56128 | PIGN      | 0.0111983  | -1.5478  |
| COCH     | 5.75E-05 | -2.03348 | RCL1                 | 3.13E-06   | -1.56126 | ---       | 5.02E-08   | -1.54747 |
| MGC16121 | 0.00357  | -2.03307 | ---                  | 0.00623235 | -1.56095 | TYSND1    | 0.00031415 | -1.54671 |
| TCF3     | 0.0004   | -2.03238 | RCAN3                | 5.16E-06   | -1.56091 | ---       | 0.0008702  | -1.54627 |
| RBBP8    | 1.43E-09 | -2.03212 | ---                  | 6.38E-05   | -1.55972 | ---       | 0.00199616 | -1.54589 |
| KANK2    | 3.65E-07 | -2.03208 | CDK3                 | 0.00018102 | -1.55915 | RIMS3     | 0.0223838  | -1.54577 |
| KIAA0101 | 7.84E-10 | -2.03186 | ---                  | 0.00241922 | -1.5591  | SSRP1     | 4.46E-07   | -1.54563 |
| BARD1    | 7.35E-08 | -2.03177 | RAD51                | 0.00050453 | -1.55909 | CDKN2C    | 0.00493497 | -1.54476 |
| VCAN     | 0.00713  | -2.02783 | ---                  | 0.00353992 | -1.55909 | GFRA1     | 6.55E-09   | -1.54465 |
| CENPA    | 2.98E-05 | -2.02683 | ---                  | 0.00057922 | -1.55866 | PDGFA     | 0.0258262  | -1.54355 |
| RRM1     | 1.33E-07 | -2.02669 | NPY1R                | 4.56E-06   | -1.55818 | ESCO2     | 0.0102108  | -1.5434  |

|                     |          |          |                      |            |          |          |            |          |
|---------------------|----------|----------|----------------------|------------|----------|----------|------------|----------|
| THRA                | 0.0017   | -2.0264  | SMARCA4              | 1.81E-05   | -1.55808 | SSU72    | 0.0129518  | -1.54319 |
| PRPS2               | 5.56E-05 | -2.02625 | NUP62                | 8.77E-06   | -1.55774 | BRCA1    | 0.00236128 | -1.54297 |
| DHFR                | 5.65E-07 | -2.02568 | DICER1               | 0.00095536 | -1.5575  | NBR2     | 0.0338998  | -1.54249 |
| ECHDC2              | 9.36E-05 | -2.02566 | LOC400960            | 0.00057186 | -1.5575  | ---      | 4.68E-05   | -1.54201 |
| CCNA2               | 1.12E-06 | -2.02563 | ---                  | 0.00281731 | -1.55701 | ZNF629   | 6.09E-06   | -1.5419  |
| 00132214 /// LOC100 | 0.00132  | -2.02401 | ---                  | 0.00116113 | -1.55684 | ZNF573   | 0.00052677 | -1.5418  |
| XRCC2               | 8.37E-05 | -2.02393 | SMARCA4              | 4.74E-07   | -1.55598 | FAM83D   | 1.83E-05   | -1.54177 |
| ZNF805              | 0.00018  | -2.02332 | CAPN9                | 0.00576909 | -1.55593 | DLC1     | 0.00117317 | -1.54123 |
| MTRF1               | 2.18E-06 | -2.02326 | BPF15 /// NBPF16 /// | 2.85E-06   | -1.5555  | WDR68    | 4.37E-07   | -1.54107 |
| RAB31               | 7.19E-07 | -2.02319 | ANXA6                | 4.07E-06   | -1.55546 | TMPO     | 0.00011333 | -1.5407  |
| ZNF136              | 0.0174   | -2.02292 | HIST1H2BG            | 2.63E-05   | -1.55517 | GDAP1    | 0.00089206 | -1.53944 |
| CDC6                | 1.44E-06 | -2.02238 | IGFBP4               | 0.00013825 | -1.55505 | PHLDA1   | 0.0603028  | -1.53919 |
| RAB31               | 5.17E-08 | -2.02202 | ---                  | 0.00047124 | -1.55426 | ---      | 0.00833296 | -1.5391  |
| ARHGAP24            | 1.43E-05 | -2.02172 | ---                  | 0.0186783  | -1.55391 | HMBOX1   | 0.00121553 | -1.5386  |
| TMEM19              | 2.56E-06 | -2.02143 | FUS                  | 0.00318354 | -1.55384 | ---      | 5.35E-05   | -1.5386  |
| C13orf34            | 6.39E-05 | -2.02116 | ---                  | 0.00118423 | -1.55353 | KIAA1333 | 2.51E-05   | -1.53841 |
| MLYCD               | 8.87E-11 | -2.0208  | TNRC6A               | 1.19E-06   | -1.55332 | IGSF9    | 0.00693632 | -1.53836 |
| RBM24               | 9.09E-07 | -2.01951 | SSU72                | 0.0120721  | -1.55308 | ANKRD35  | 0.00024865 | -1.53816 |
| HNRNPC              | 0.00013  | -2.01947 | ---                  | 0.145185   | -1.55278 | DLEU2    | 0.0001348  | -1.5378  |
| ---                 | 7.95E-08 | -2.01917 | FBXO9                | 0.0031367  | -1.55276 | FLJ25006 | 0.00375875 | -1.53773 |
| CDCA2               | 6.27E-09 | -2.01898 | FLJ42627             | 0.00241833 | -1.55233 | ---      | 0.00020983 | -1.53711 |
| SLC2A10             | 3.73E-07 | -2.01664 | ---                  | 0.00329443 | -1.55222 | ---      | 3.38E-05   | -1.53637 |
| TTLL5               | 8.82E-05 | -2.01641 | CXXC5                | 1.16E-08   | -1.55132 | HS3ST3A1 | 0.00012819 | -1.53628 |
| RAGE                | 0.00042  | -2.0162  | UCP2                 | 2.54E-06   | -1.55118 | PHACTR4  | 8.96E-06   | -1.53624 |
| EFHD2               | 2.81E-05 | -2.01559 | ---                  | 0.00297445 | -1.55079 | SDC2     | 0.0673405  | -1.5359  |
| ---                 | 1.18E-06 | -2.01387 | OC729602 /// LOC729  | 7.03E-05   | -1.55058 | DDX11    | 0.00012806 | -1.53582 |
| CTDSPL2             | 1.41E-07 | -2.01372 | ---                  | 0.00396018 | -1.55052 | ---      | 0.00018472 | -1.53574 |
| CEP192              | 3.53E-05 | -2.01369 | ---                  | 0.0531571  | -1.55025 | SNX24    | 0.00491433 | -1.53551 |
| RAD51AP1            | 9.95E-06 | -2.01344 | TIPARP               | 1.03E-06   | -1.55009 | ---      | 0.00114378 | -1.53535 |
| CCNE2               | 1.65E-06 | -2.01261 | PHLDA1               | 0.0570314  | -1.55009 | ---      | 0.0001023  | -1.5351  |
| GALNT10             | 6.69E-06 | -2.01243 | UBE4B                | 4.66E-05   | -1.54963 | TRPS1    | 0.00024469 | -1.53456 |
| PIAS3               | 1.35E-09 | -2.0116  | HIVEP3               | 0.00104177 | -1.54927 | ---      | 0.00279771 | -1.53452 |
| ---                 | 0.00016  | -2.01159 | HELLS                | 8.87E-06   | -1.54918 | PRDM6    | 1.72E-05   | -1.53451 |
| SUV420H1            | 1.34E-07 | -2.01062 | MIDN                 | 0.00271054 | -1.54915 | WDR61    | 4.68E-08   | -1.53393 |
| AP1S2               | 2.91E-07 | -2.01004 | NFATC2IP             | 1.35E-08   | -1.54828 | POLQ     | 0.00323873 | -1.53363 |
| C12orf49            | 4.51E-05 | -2.00956 | tcag7.1228           | 0.00151363 | -1.54828 | C6orf120 | 1.22E-05   | -1.53356 |
| DDB2                | 9.34E-08 | -2.00924 | ALS2CR13             | 0.0388219  | -1.54821 | CMYA5    | 0.0147959  | -1.53334 |
| VPS26B              | 6.40E-06 | -2.00866 | KLHDC5               | 0.00042301 | -1.54788 | IGF1R    | 7.38E-05   | -1.53313 |
| PEX26               | 9.24E-06 | -2.00846 | USP22                | 0.00091974 | -1.54782 | SNX24    | 0.0001318  | -1.53296 |
| RAD18               | 0.00075  | -2.00782 | ---                  | 0.00096492 | -1.5476  | CXXC5    | 1.45E-08   | -1.53248 |
| NCAPD2              | 8.72E-08 | -2.00758 | ---                  | 0.0147733  | -1.5475  | ---      | 0.0102828  | -1.53234 |
| PVRL2               | 4.73E-08 | -2.00506 | ---                  | 0.00283483 | -1.54732 | COL1A1   | 0.00148491 | -1.53219 |
| ---                 | 3.72E-06 | -2.00429 | CXXC5                | 3.19E-08   | -1.54717 | RCL1     | 4.34E-06   | -1.53217 |
| NOS1AP              | 0.00038  | -2.00424 | FMN1                 | 0.0003352  | -1.54716 | AMH      | 3.93E-06   | -1.53194 |
| SULF2               | 1.65E-07 | -2.00402 | FUSIP1 /// LOC642558 | 0.00029327 | -1.54609 | BTBD3    | 0.00027264 | -1.53168 |
| TTC23               | 0.00167  | -2.00357 | EEF2K                | 0.00040353 | -1.54598 | CXorf24  | 0.00681716 | -1.53155 |
| CAD                 | 4.65E-07 | -2.00342 | 10-Sep               | 1.30E-06   | -1.54565 | ---      | 0.00350738 | -1.53151 |
| TMEM121             | 0.00054  | -2.00325 | PIF1                 | 5.40E-05   | -1.54559 | C10orf18 | 0.00523217 | -1.53123 |
| C6orf173            | 2.43E-08 | -2.00227 | HMBOX1               | 0.00114072 | -1.54544 | KCTD20   | 0.00337621 | -1.53103 |

|                  |          |          |           |            |          |                     |            |          |
|------------------|----------|----------|-----------|------------|----------|---------------------|------------|----------|
| C16orf53         | 2.63E-07 | -2.00203 | PCDH9     | 0.00044771 | -1.54535 | ---                 | 0.0001485  | -1.53102 |
| PTBP1            | 1.69E-09 | -2.00079 | ---       | 0.00083707 | -1.54484 | LIG1                | 3.29E-06   | -1.53101 |
| ETNK1            | 1.56E-05 | -2.00069 | PDHA1     | 3.23E-05   | -1.54481 | FLJ27365            | 0.0112493  | -1.53066 |
| SSR1             | 8.43E-08 | -1.99945 | UGDH      | 2.74E-05   | -1.54421 | LOC286109           | 0.0867436  | -1.53061 |
| MELK             | 1.10E-08 | -1.99905 | TRPS1     | 9.25E-05   | -1.54416 | ---                 | 0.00360211 | -1.52998 |
| ALDH6A1          | 8.58E-07 | -1.99827 | CMBL      | 9.35E-07   | -1.5441  | FOLR1               | 0.0172348  | -1.52961 |
| LOC151162        | 6.56E-08 | -1.99792 | KIAA1600  | 9.52E-06   | -1.54389 | SAMD4A              | 0.0166219  | -1.52957 |
| CRLF1            | 6.28E-05 | -1.99745 | SMC1A     | 3.83E-05   | -1.54359 | ---                 | 1.52E-05   | -1.52943 |
| ---              | 9.24E-05 | -1.99673 | PDLIM5    | 5.41E-06   | -1.54336 | FAM120B             | 7.83E-06   | -1.52902 |
| COL6A2           | 0.00211  | -1.99523 | FLJ41747  | 0.0271652  | -1.54334 | METTL7A             | 0.00502226 | -1.52871 |
| SMC1A            | 1.19E-06 | -1.99521 | ---       | 0.00216211 | -1.54291 | ---                 | 0.0015791  | -1.52844 |
| FKTN             | 1.11E-06 | -1.99468 | RPL28     | 0.00093442 | -1.54241 | ---                 | 0.0161798  | -1.52843 |
| SLC44A1          | 0.00962  | -1.99374 | ---       | 0.0243472  | -1.54173 | SMCHD1              | 0.00702852 | -1.52831 |
| ---              | 9.21E-07 | -1.99057 | ---       | 0.00492583 | -1.54124 | GPR125              | 0.00097781 | -1.52774 |
| RAB27A           | 3.73E-06 | -1.99024 | YLPM1     | 0.00016956 | -1.54117 | ZNF618              | 0.00857053 | -1.52759 |
| MCM3APAS         | 0.0001   | -1.98969 | LOC642533 | 8.85E-05   | -1.54108 | ---                 | 3.31E-06   | -1.52746 |
| WDR1             | 3.48E-08 | -1.98863 | RC3H2     | 1.62E-06   | -1.5409  | ---                 | 0.010454   | -1.52742 |
| TRIM3            | 0.00135  | -1.98781 | ZBED1     | 3.01E-06   | -1.54085 | ZAK                 | 0.00110086 | -1.52715 |
| UBE2C            | 1.77E-07 | -1.98747 | BICD2     | 6.86E-05   | -1.54069 | KATNB1              | 0.0334696  | -1.52702 |
| SPHK2            | 4.65E-05 | -1.98713 | UGT2B28   | 0.0270376  | -1.53967 | ---                 | 0.00095006 | -1.52678 |
| NUTF2            | 0.00016  | -1.98682 | FAM120B   | 6.94E-06   | -1.53957 | ---                 | 0.00017933 | -1.52665 |
| TIMP3            | 0.00023  | -1.98652 | ZNF548    | 0.00492212 | -1.53875 | LOC728198 /// TAF9L | 8.09E-06   | -1.52623 |
| ---              | 0.00415  | -1.98641 | FLJ31306  | 2.71E-07   | -1.53868 | BRI3BP              | 1.56E-06   | -1.52527 |
| FANCA            | 3.10E-06 | -1.98517 | ITGB4     | 0.00052753 | -1.53859 | PAX9                | 0.0220656  | -1.52513 |
| MCM4             | 5.44E-07 | -1.98377 | SYK       | 0.0208807  | -1.5385  | FANCI               | 3.52E-07   | -1.52489 |
| BAG5             | 8.11E-06 | -1.98326 | ZAK       | 9.12E-06   | -1.53842 | SP1                 | 0.0136767  | -1.52464 |
| CHML             | 6.85E-07 | -1.98209 | MYC       | 5.11E-06   | -1.53837 | C16orf55            | 0.00014357 | -1.52401 |
| MGC16121         | 0.00106  | -1.98205 | ---       | 8.21E-05   | -1.5373  | ATXN1L              | 1.18E-06   | -1.52385 |
| DSN1             | 2.18E-06 | -1.98116 | DSG2      | 3.20E-06   | -1.53722 | TMEM40              | 0.0154032  | -1.5236  |
| CDKN3            | 1.29E-07 | -1.9811  | C14orf93  | 0.00857056 | -1.53721 | GPATCH4             | 1.28E-06   | -1.52347 |
| TXNDC13          | 1.41E-07 | -1.98109 | ---       | 0.0270898  | -1.53609 | FANCG /// VCP       | 7.14E-07   | -1.52329 |
| SNX24            | 4.30E-06 | -1.98074 | FXR2      | 0.0506387  | -1.53521 | EGR3                | 3.57E-06   | -1.52291 |
| C20orf112        | 1.31E-09 | -1.97895 | KIAA1333  | 2.60E-05   | -1.53517 | BMP2K               | 0.0380954  | -1.52266 |
| PLCXD1           | 2.86E-07 | -1.97786 | PAXIP1    | 4.88E-05   | -1.53513 | CEP350              | 0.00918631 | -1.52265 |
| KCTD10           | 1.41E-07 | -1.97777 | PRDM6     | 1.71E-05   | -1.53512 | UBE4B               | 0.00098897 | -1.52265 |
| QSER1            | 7.60E-07 | -1.97689 | ZBTB44    | 0.00455826 | -1.53502 | FLVCR2              | 0.00021554 | -1.52245 |
| RAD1             | 0.00922  | -1.976   | FLJ41757  | 0.0273055  | -1.53492 | PPP1R15B            | 0.00034602 | -1.52177 |
| ---              | 4.09E-05 | -1.97575 | RECQL4    | 0.00045357 | -1.53465 | GNL3L               | 0.0212092  | -1.52141 |
| KCTD15           | 0.00014  | -1.97416 | NLN       | 0.00287883 | -1.53445 | GRSF1               | 0.0004405  | -1.5208  |
| ---              | 1.96E-05 | -1.97411 | ---       | 0.00212629 | -1.53387 | DDX11               | 1.41E-05   | -1.52068 |
| TOPBP1           | 3.71E-08 | -1.97325 | ABCA5     | 1.70E-06   | -1.53371 | ---                 | 0.0255459  | -1.52053 |
| ---              | 4.07E-05 | -1.97322 | DHFR      | 2.48E-05   | -1.53352 | ---                 | 1.60E-06   | -1.5205  |
| GMFB             | 5.03E-10 | -1.97315 | ---       | 1.65E-05   | -1.5334  | OGG1                | 0.0197003  | -1.52025 |
| C6orf26 /// MSH5 | 8.54E-06 | -1.97312 | ---       | 3.25E-05   | -1.53326 | ---                 | 0.0358035  | -1.52008 |
| ---              | 0.00019  | -1.97301 | ---       | 0.00137976 | -1.53325 | DHFR                | 1.15E-05   | -1.51985 |
| C16orf59         | 1.64E-05 | -1.97239 | CDK5RAP3  | 1.81E-07   | -1.53287 | ZNF618              | 0.00345066 | -1.51977 |
| ---              | 5.11E-05 | -1.97215 | ---       | 0.00654273 | -1.53267 | KIAA0101            | 7.42E-05   | -1.51974 |
| HIPK3            | 0.00817  | -1.97099 | ---       | 0.00040506 | -1.53247 | ---                 | 0.163435   | -1.5195  |
| ---              | 1.14E-07 | -1.97087 | ---       | 0.00088653 | -1.53242 | PGGT1B              | 0.00160019 | -1.51924 |



|                   |          |          |                       |            |          |                     |            |          |
|-------------------|----------|----------|-----------------------|------------|----------|---------------------|------------|----------|
| ATL3              | 5.68E-06 | -1.9706  | ---                   | 3.35E-05   | -1.53186 | ---                 | 3.08E-06   | -1.51911 |
| MAN1A1            | 2.57E-06 | -1.96936 | FLJ31306              | 0.00058441 | -1.53155 | ---                 | 6.50E-05   | -1.51895 |
| ATP2A3            | 0.0011   | -1.96852 | TRIM45                | 0.00202612 | -1.53148 | ---                 | 0.0908157  | -1.51823 |
| SYNGAP1 /// ZBTB9 | 8.12E-09 | -1.96843 | FERMT2                | 0.00012862 | -1.53131 | C6orf89             | 5.05E-06   | -1.51775 |
| RIBC2             | 0.00035  | -1.96701 | ---                   | 0.00100486 | -1.53125 | ---                 | 1.71E-05   | -1.51772 |
| KIAA0528          | 3.22E-07 | -1.96631 | NOVA1                 | 0.00330839 | -1.5312  | ---                 | 0.00146017 | -1.5177  |
| USP46             | 1.11E-06 | -1.96616 | FUS                   | 4.69E-05   | -1.53111 | ---                 | 0.0060148  | -1.51717 |
| ---               | 1.99E-06 | -1.96592 | KIAA1267              | 0.0003208  | -1.5308  | ---                 | 0.0234975  | -1.51696 |
| RRM2              | 6.74E-07 | -1.96514 | GLTSCR2               | 1.19E-07   | -1.53078 | IPO7                | 3.50E-05   | -1.51631 |
| SSR1              | 4.65E-06 | -1.96482 | ---                   | 0.00678363 | -1.53063 | EFNB2               | 0.0235345  | -1.51614 |
| ADPGK             | 4.20E-06 | -1.96469 | NFATC2IP              | 2.79E-05   | -1.52993 | CAPG                | 0.00022932 | -1.51613 |
| CKLF              | 3.42E-06 | -1.96464 | SNX24                 | 0.00515045 | -1.52986 | C440345 /// LOC641  | 0.00022179 | -1.51611 |
| ---               | 1.75E-06 | -1.96163 | LRRFIP2               | 7.80E-05   | -1.52974 | QKI                 | 0.00175115 | -1.51604 |
| EED               | 4.45E-06 | -1.96111 | MAG11                 | 0.00052618 | -1.52945 | ---                 | 0.0337617  | -1.51581 |
| SMARCB1           | 4.33E-07 | -1.96024 | ---                   | 0.0180698  | -1.52902 | UBAP2               | 0.00018922 | -1.51533 |
| CEP135            | 0.00022  | -1.95996 | CADPS2                | 7.70E-05   | -1.52888 | QKI                 | 0.00330054 | -1.51511 |
| SSX2IP            | 7.17E-05 | -1.95993 | P11-345P4.4 /// SLC35 | 1.84E-07   | -1.5288  | ---                 | 1.87E-05   | -1.5149  |
| LOC441242         | 0.00015  | -1.95987 | ---                   | 0.0123282  | -1.52845 | /// BAGE3 /// BAGE5 | 0.0298901  | -1.51425 |
| AP4S1             | 0.00202  | -1.95835 | MGC33894              | 0.0110262  | -1.52803 | USP54               | 0.00036642 | -1.51418 |
| PPP1R9B           | 4.50E-05 | -1.95791 | C440345 /// LOC6412   | 0.00019634 | -1.52753 | TIMM50              | 0.00576302 | -1.51373 |
| SYTL4             | 0.0063   | -1.95737 | ANK3                  | 2.39E-06   | -1.52729 | ---                 | 0.0169018  | -1.51369 |
| C9orf100          | 0.00016  | -1.95723 | ---                   | 0.00565218 | -1.52728 | WDR77               | 0.00062927 | -1.51341 |
| ANTXR1            | 2.59E-07 | -1.9546  | CBX5                  | 1.35E-05   | -1.52701 | ATF7IP2             | 1.68E-05   | -1.51325 |
| RACGAP1           | 5.06E-09 | -1.95441 | RC3H2                 | 0.00019287 | -1.52683 | ---                 | 0.00903778 | -1.51312 |
| FLJ38973          | 2.10E-05 | -1.95367 | C5                    | 0.0141896  | -1.52677 | MSTO1               | 0.00091376 | -1.51178 |
| RAB2B             | 1.33E-06 | -1.95346 | ---                   | 0.00748505 | -1.52669 | ---                 | 0.00015057 | -1.5108  |
| CASC5             | 0.01125  | -1.95268 | PPP2R5C               | 2.68E-05   | -1.52627 | HIST1H2AM           | 0.00282895 | -1.51071 |
| TMPO              | 2.48E-09 | -1.95247 | ---                   | 0.00416498 | -1.5262  | LRRFIP2             | 9.64E-05   | -1.51066 |
| DNAL1             | 4.88E-06 | -1.95165 | CENPI                 | 0.00694791 | -1.52613 | TIPARP              | 1.64E-06   | -1.51054 |
| ---               | 8.66E-07 | -1.95113 | ---                   | 0.00750918 | -1.52595 | MED13               | 0.00041362 | -1.51042 |
| REPS2             | 0.00015  | -1.95066 | ---                   | 0.0001181  | -1.52593 | GREB1               | 0.00636851 | -1.51037 |
| ---               | 3.87E-06 | -1.95014 | ---                   | 0.00211018 | -1.5258  | ZNF669              | 0.0003233  | -1.50956 |
| ODF2              | 1.80E-06 | -1.94997 | RUFY2                 | 5.87E-05   | -1.52519 | FLNA                | 2.54E-05   | -1.50946 |
| ATP2A3            | 4.81E-07 | -1.94991 | BMP2K                 | 0.0375474  | -1.52506 | FOSL2               | 4.79E-06   | -1.5093  |
| PER3              | 0.00016  | -1.9498  | ---                   | 0.00228481 | -1.52489 | ---                 | 3.30E-06   | -1.50919 |
| LOC81691          | 0.00024  | -1.94979 | ---                   | 0.00505811 | -1.52431 | MSL-1               | 0.00017528 | -1.5091  |
| ---               | 1.60E-05 | -1.9493  | RPL31                 | 0.00039034 | -1.52418 | PAK1                | 0.00039217 | -1.50909 |
| SH3BGRL3          | 2.52E-06 | -1.94909 | ---                   | 0.00113392 | -1.52407 | KCNMB4              | 9.66E-05   | -1.50874 |
| ZWINT             | 4.60E-09 | -1.94724 | LOC644246             | 0.00710525 | -1.52349 | PPFIA4              | 0.00067044 | -1.50853 |
| C14orf94          | 1.17E-05 | -1.94669 | ---                   | 0.00154959 | -1.52317 | MANEAL              | 1.87E-06   | -1.50846 |
| TNFRSF25          | 7.76E-05 | -1.94641 | ---                   | 0.00350275 | -1.52286 | LOC728198 /// TAF9  | 0.00144343 | -1.50769 |
| DEPDC1            | 1.01E-05 | -1.94628 | ---                   | 7.90E-05   | -1.52259 | DAAMI               | 4.62E-05   | -1.50731 |
| PHF19             | 8.72E-07 | -1.94624 | CDV3                  | 1.07E-06   | -1.52255 | C1orf176            | 0.0164954  | -1.50691 |
| ---               | 5.94E-05 | -1.94567 | SMAD2                 | 0.00538444 | -1.52143 | ISG20L2             | 2.54E-07   | -1.50663 |
| ---               | 0.00014  | -1.9456  | THBS1                 | 4.39E-05   | -1.5213  | ---                 | 0.00017368 | -1.50631 |
| AGBL5             | 1.82E-07 | -1.94398 | FLNA                  | 2.22E-05   | -1.52116 | C1orf34             | 3.42E-05   | -1.50479 |
| MYO1D             | 4.75E-05 | -1.94302 | ---                   | 0.00077051 | -1.52111 | C1orf163            | 0.00111701 | -1.50467 |
| H3F3A /// H3F3B   | 3.90E-10 | -1.94208 | ESR1                  | 0.0128976  | -1.52107 | C14orf106           | 0.00419118 | -1.50463 |
| PTBP1             | 1.85E-09 | -1.94194 | UBE2CBP               | 0.00010175 | -1.52099 | MPZL1               | 0.00124837 | -1.50439 |

|                   |          |          |                  |            |          |                   |            |          |
|-------------------|----------|----------|------------------|------------|----------|-------------------|------------|----------|
| IMPA2             | 9.35E-09 | -1.94187 | ---              | 0.00014632 | -1.52078 | MLF1IP            | 0.00311927 | -1.50369 |
| ---               | 3.08E-07 | -1.94165 | GNG12            | 1.16E-06   | -1.52047 | FMN1              | 0.00052351 | -1.50368 |
| PDE7A             | 0.00025  | -1.94102 | ---              | 0.00061679 | -1.52004 | PSIP1             | 1.27E-05   | -1.50344 |
| TYRO3             | 0.00484  | -1.94055 | C9orf100         | 0.00109062 | -1.52003 | CNOT6             | 4.19E-05   | -1.50343 |
| ---               | 0.00771  | -1.93975 | NOLC1            | 7.60E-06   | -1.51996 | MTG1              | 0.00445926 | -1.50315 |
| RNF40             | 1.71E-06 | -1.93947 | TRPS1            | 2.17E-06   | -1.51978 | UGCG              | 0.00010669 | -1.50303 |
| RBM9              | 0.00021  | -1.93836 | C8orf44 /// SGK3 | 0.00027228 | -1.51938 | ---               | 0.00381881 | -1.50294 |
| FANCM             | 1.41E-05 | -1.93789 | ---              | 0.00024057 | -1.5191  | RC3H2             | 4.17E-05   | -1.50262 |
| GLT8D3            | 4.97E-05 | -1.93761 | TAF15            | 0.0161826  | -1.51894 | MLF1IP            | 7.02E-05   | -1.50226 |
| ---               | 8.58E-06 | -1.93634 | CIT              | 0.00012703 | -1.5183  | TAPBP             | 1.14E-05   | -1.50219 |
| ---               | 7.15E-06 | -1.9339  | ---              | 0.0001965  | -1.51796 | LIN52             | 1.78E-05   | -1.50204 |
| MBOAT2            | 4.50E-05 | -1.93354 | APOLD1           | 0.0549794  | -1.51796 | ---               | 0.0565168  | -1.50204 |
| POLD3             | 9.49E-07 | -1.93345 | BICD2            | 0.00095668 | -1.51763 | ZNF738            | 0.0332342  | -1.50199 |
| PTPLB             | 1.73E-06 | -1.93337 | CHML             | 2.84E-05   | -1.51742 | ---               | 9.85E-08   | -1.50132 |
| ---               | 0.00259  | -1.93324 | FRMD4A           | 0.00168616 | -1.5174  | RBMS1             | 0.00064414 | -1.50122 |
| C21orf81          | 8.65E-07 | -1.93321 | LOC100128191     | 0.0009757  | -1.51704 | PFAS              | 7.00E-06   | -1.50051 |
| PXMP2             | 5.29E-08 | -1.93281 | AURKB            | 0.0544767  | -1.5169  | CDKN2C            | 0.0007992  | -1.50022 |
| ---               | 3.62E-06 | -1.93252 | PPP1R1C          | 0.0001584  | -1.51638 | ARL6IP2           | 0.00064899 | 1.50003  |
| RTN2              | 1.54E-06 | -1.93223 | ---              | 0.00306908 | -1.51625 | LOC145842         | 0.0176324  | 1.50056  |
| TMEM121           | 4.95E-06 | -1.93222 | RAI14            | 5.03E-05   | -1.51624 | LOC100131601      | 0.047207   | 1.50136  |
| ALG10B            | 9.96E-05 | -1.93219 | ASPM             | 0.0235732  | -1.51544 | VEZT              | 0.00016934 | 1.50153  |
| ---               | 0.00023  | -1.93161 | CCL28            | 0.00034299 | -1.51526 | BEX2              | 1.14E-05   | 1.50158  |
| MTSS1             | 0.0017   | -1.93065 | ---              | 0.0336193  | -1.51523 | MRPL19            | 0.0180533  | 1.50195  |
| CDKN3             | 2.15E-08 | -1.93037 | ---              | 0.00042093 | -1.51522 | LOC162993         | 8.16E-05   | 1.50205  |
| USP46             | 1.25E-05 | -1.93014 | ---              | 0.00545066 | -1.51494 | C15orf24          | 0.0147623  | 1.50219  |
| IL27RA            | 0.00222  | -1.92949 | ---              | 0.00829951 | -1.51488 | MTHFR             | 0.00036777 | 1.50283  |
| NSMCE4A           | 0.00013  | -1.92838 | NRCAM            | 5.00E-06   | -1.51467 | ---               | 0.0616478  | 1.50292  |
| ---               | 1.79E-07 | -1.9279  | VTI1B            | 4.86E-06   | -1.51442 | EML2              | 0.00018823 | 1.5031   |
| NFKBIL2           | 0.00012  | -1.92767 | TYSND1           | 0.0004387  | -1.51398 | ING1              | 2.67E-05   | 1.50313  |
| BTBD2             | 7.10E-06 | -1.92693 | ---              | 0.0169553  | -1.51325 | EIF2AK2           | 4.74E-06   | 1.50322  |
| CCNB1             | 2.20E-09 | -1.9251  | ---              | 6.37E-05   | -1.51307 | HUS1              | 8.46E-05   | 1.50329  |
| TREX2 /// UCHL5IP | 1.36E-06 | -1.9249  | BMPR1B           | 6.63E-06   | -1.51274 | DNAJC15           | 2.27E-06   | 1.5034   |
| PHF19             | 1.83E-08 | -1.92414 | SGPL1            | 0.14088    | -1.5121  | CKB               | 2.22E-06   | 1.50354  |
| IKBKAP            | 1.85E-07 | -1.92412 | RC3H2            | 3.75E-05   | -1.51172 | CTSL1             | 9.23E-06   | 1.50357  |
| HNRNPA3           | 2.12E-06 | -1.9235  | HIST1H3H         | 1.28E-06   | -1.51146 | UNC93B1           | 6.52E-05   | 1.50357  |
| ---               | 0.00072  | -1.92318 | ---              | 0.0042188  | -1.51131 | KAZALD1           | 0.00545821 | 1.50374  |
| KIAA0114          | 1.54E-07 | -1.92278 | CHSY1            | 5.48E-07   | -1.51123 | SLC7A5            | 1.71E-06   | 1.50432  |
| VTI1B             | 1.48E-07 | -1.92275 | PPP1R15B         | 0.00038683 | -1.51118 | C15orf17          | 0.0162729  | 1.50462  |
| ---               | 0.0015   | -1.92242 | GUSBP1           | 2.07E-05   | -1.51102 | C9orf119          | 0.00010236 | 1.50475  |
| SDK2              | 0.00309  | -1.92205 | FBXL20           | 0.00134413 | -1.51102 | RAG1API           | 1.28E-05   | 1.50528  |
| C1orf145          | 0.00149  | -1.92198 | UBE4B            | 0.00026857 | -1.51035 | ASF1A             | 4.58E-08   | 1.50562  |
| PPP1R9A           | 1.66E-05 | -1.92147 | ADRB1            | 0.0107709  | -1.51029 | SESN1             | 6.76E-05   | 1.50602  |
| LOC201725         | 0.0021   | -1.92103 | PPP2R2A          | 6.76E-07   | -1.51018 | ARL1              | 0.00074933 | 1.50689  |
| C21orf86          | 5.11E-06 | -1.91996 | SMARCA4          | 4.00E-07   | -1.51016 | FAM45A /// FAM45B | 8.41E-06   | 1.5069   |
| STAU2             | 0.00021  | -1.91912 | AKAP13           | 4.58E-06   | -1.51013 | CAB39             | 0.00202417 | 1.50692  |
| ANP32E            | 2.17E-06 | -1.91746 | ---              | 1.81E-06   | -1.50988 | SLC2A13           | 0.0383031  | 1.50699  |
| ---               | 0.00011  | -1.91723 | ---              | 0.00698824 | -1.50988 | CLEC2D            | 0.0816464  | 1.5071   |
| TPM3              | 1.86E-07 | -1.91715 | TCF19            | 0.00104757 | -1.50921 | MYO6              | 3.63E-05   | 1.50741  |
| ANKRD18A          | 0.00275  | -1.91653 | FKTN             | 5.26E-05   | -1.50917 | C17orf39          | 0.00210038 | 1.50769  |

|                   |          |          |                       |            |          |                     |            |         |
|-------------------|----------|----------|-----------------------|------------|----------|---------------------|------------|---------|
| ANKRD5            | 3.53E-06 | -1.91639 | CAD                   | 2.44E-05   | -1.50916 | BTRC                | 0.00034482 | 1.50783 |
| ---               | 1.80E-07 | -1.91503 | ---                   | 0.0188576  | -1.50911 | ---                 | 0.0026258  | 1.50816 |
| HNRNPU            | 0.00018  | -1.91476 | AFF1                  | 2.12E-06   | -1.50907 | SERPINH1            | 6.39E-06   | 1.50847 |
| GFRA3             | 0.01102  | -1.91472 | ---                   | 0.0163489  | -1.50901 | N4BP3               | 6.39E-05   | 1.50855 |
| ITGAE             | 1.67E-08 | -1.9138  | DKFZp58611420         | 2.09E-05   | -1.50885 | RPS6KA5             | 3.52E-06   | 1.50872 |
| GTSE1             | 0.02401  | -1.91329 | WSB1                  | 6.27E-07   | -1.50859 | LOX                 | 0.00297535 | 1.50876 |
| RPS15A            | 6.61E-05 | -1.9131  | ---                   | 0.0104751  | -1.50829 | CAPS                | 0.00152748 | 1.50907 |
| UBE2J1            | 3.89E-05 | -1.91285 | LRRFIP2               | 1.07E-05   | -1.50803 | ---                 | 0.00246649 | 1.50912 |
| RCCD1             | 3.59E-07 | -1.9127  | ---                   | 0.00498505 | -1.50753 | SETDB2              | 3.13E-05   | 1.50924 |
| MARCKS            | 3.96E-06 | -1.91233 | PDLIM5                | 6.22E-07   | -1.50732 | LTB                 | 0.00110297 | 1.50928 |
| ---               | 0.0002   | -1.91103 | TET2                  | 0.0164134  | -1.50703 | NAPG                | 6.02E-05   | 1.50946 |
| ---               | 0.00055  | -1.91075 | LOC643988             | 6.62E-05   | -1.50698 | STXBP4              | 0.00060772 | 1.50978 |
| MZF1              | 0.00061  | -1.91073 | USP40                 | 0.00267749 | -1.5069  | SNX25               | 0.0009906  | 1.50983 |
| FBXO9             | 0.00028  | -1.90942 | CHD7                  | 7.78E-07   | -1.5068  | C17orf68            | 0.00106035 | 1.50991 |
| SERTAD4           | 0.0008   | -1.90935 | RREB1                 | 2.68E-06   | -1.5067  | LRRC23              | 0.001692   | 1.51119 |
| CENPT             | 2.21E-06 | -1.90929 | THBS1                 | 0.00126282 | -1.5066  | LOC728431           | 0.00045633 | 1.51139 |
| LOC100127983      | 4.28E-05 | -1.90886 | ---                   | 0.00411847 | -1.50652 | TFDP2               | 0.00025494 | 1.51141 |
| RTN2              | 3.69E-06 | -1.90818 | TRPS1                 | 0.00032969 | -1.50633 | SLC4A7              | 0.00197829 | 1.51141 |
| PTGER3            | 0.0017   | -1.90738 | DCLK1                 | 9.09E-07   | -1.50611 | SH3BGRL3            | 8.62E-05   | 1.51166 |
| ---               | 0.00394  | -1.9073  | ---                   | 0.00013409 | -1.50607 | ---                 | 0.00010833 | 1.51184 |
| CCNE2             | 1.26E-07 | -1.90706 | CCDC117               | 4.54E-06   | -1.50559 | TMEM59              | 5.10E-08   | 1.51119 |
| SERP1             | 4.57E-09 | -1.90629 | HA3 /// PCDHA4 /// PC | 4.76E-06   | -1.50529 | GCHFR               | 0.00018356 | 1.51205 |
| GLUD1             | 0.00076  | -1.90612 | ---                   | 0.00112965 | -1.50523 | M1 /// CALM2 /// CA | 1.74E-05   | 1.51242 |
| SFRS1             | 6.85E-09 | -1.90561 | SMARCA4               | 1.57E-05   | -1.50508 | GPR65               | 0.00364057 | 1.51265 |
| LOC124446         | 0.00551  | -1.90535 | HELB                  | 0.00449185 | -1.50498 | BAMBI               | 9.31E-09   | 1.51274 |
| PSIP1             | 3.91E-07 | -1.90507 | AKAP13                | 0.000126   | -1.50497 | CTSB                | 6.16E-07   | 1.51295 |
| ---               | 0.00049  | -1.90476 | WDR4                  | 2.05E-05   | -1.50484 | PRSS8               | 3.12E-05   | 1.51299 |
| PDS5A             | 0.00732  | -1.90397 | ---                   | 0.0256786  | -1.5047  | IFIH1               | 0.00192972 | 1.5134  |
| ARG2              | 0.00224  | -1.90335 | SSFA2                 | 6.27E-07   | -1.50458 | ATP1B1              | 1.44E-06   | 1.51341 |
| RBBP9             | 0.00228  | -1.90238 | tcag7.1228            | 0.007691   | -1.50319 | MLX                 | 2.52E-06   | 1.51361 |
| ---               | 4.65E-05 | -1.9016  | SP1                   | 0.0160891  | -1.50288 | SLC39A14            | 1.12E-05   | 1.51381 |
| ARHGAP19          | 0.00097  | -1.90017 | PRPS1                 | 6.01E-06   | -1.50249 | SSH1                | 0.00442046 | 1.51452 |
| ATP2A3            | 1.62E-06 | -1.89961 | ---                   | 0.00023163 | -1.50196 | COL6A1              | 0.00897902 | 1.51476 |
| ---               | 4.59E-05 | -1.89942 | ---                   | 0.00461663 | -1.50186 | EOMES               | 0.0128294  | 1.51501 |
| RABL2A /// RABL2B | 8.91E-07 | -1.89843 | ---                   | 7.21E-05   | -1.50182 | ---                 | 0.0526059  | 1.51529 |
| RCAN3             | 9.00E-06 | -1.89808 | PTPRF                 | 0.00031374 | -1.5017  | GPRASP2             | 0.00027673 | 1.5153  |
| FN3KRP            | 6.79E-08 | -1.89723 | POLR2J2               | 9.63E-06   | -1.50143 | DNAJA1              | 1.25E-05   | 1.5154  |
| ---               | 1.14E-06 | -1.89684 | ---                   | 1.92E-05   | -1.50135 | TBC1D4              | 0.00059875 | 1.51563 |
| AHNAK2            | 1.44E-05 | -1.89635 | 92713 /// LOC441259   | 4.56E-05   | -1.50112 | NUPR1               | 0.00067436 | 1.51563 |
| ABI2              | 3.64E-08 | -1.89578 | ZNF789                | 0.00367684 | -1.50109 | ---                 | 1.88E-07   | 1.51599 |
| MAD2L1            | 3.57E-10 | -1.89575 | LYRM7                 | 0.0008063  | -1.50099 | TARSL2              | 0.00302478 | 1.51605 |
| CBX6 /// NPTXR    | 0.00023  | -1.89483 | TPD52L1               | 6.42E-08   | -1.50087 | OSBPL6              | 0.0541804  | 1.51646 |
| CENPQ             | 9.77E-07 | -1.89483 | ---                   | 0.00012417 | -1.50086 | LAP3                | 6.72E-05   | 1.51684 |
| KISS1R            | 0.01682  | -1.89471 | PITPNC1               | 0.0350215  | -1.50046 | C1orf79             | 0.00012704 | 1.51715 |
| MGLL              | 4.28E-06 | -1.89469 | BAT2D1                | 9.98E-05   | 1.50027  | NIPA1               | 0.00106119 | 1.51717 |
| CRYZL1            | 8.74E-07 | -1.89454 | PJA1                  | 2.05E-05   | 1.50031  | PPAPDC1B            | 5.75E-07   | 1.51735 |
| ---               | 2.37E-07 | -1.89439 | LRPAP1                | 4.47E-07   | 1.50032  | USP3                | 8.05E-06   | 1.51755 |
| TIMP1             | 1.06E-07 | -1.8937  | RASL10A               | 0.0129898  | 1.50088  | IFI6                | 0.00021563 | 1.51852 |
| ---               | 0.00025  | -1.89151 | HPS3                  | 0.019902   | 1.50139  | CTNND2              | 0.00992854 | 1.5189  |

|          |          |          |                      |            |         |                |            |         |
|----------|----------|----------|----------------------|------------|---------|----------------|------------|---------|
| HMBOX1   | 9.03E-05 | -1.89094 | LG MN                | 0.00032401 | 1.50146 | TXNDC15        | 7.93E-07   | 1.51897 |
| TNK2     | 1.48E-05 | -1.88969 | COQ4                 | 3.28E-05   | 1.50161 | GFM1           | 4.06E-05   | 1.51944 |
| ---      | 3.36E-05 | -1.88969 | SMARCD3              | 0.00490991 | 1.50223 | NR5A2          | 0.0185461  | 1.51959 |
| ---      | 1.96E-05 | -1.88915 | MAP3K5               | 0.00047551 | 1.50311 | MTUS1          | 0.00016201 | 1.51968 |
| ---      | 6.88E-05 | -1.88836 | SLC25A20             | 0.0332809  | 1.50321 | SLC9A1         | 9.85E-05   | 1.51973 |
| FAM57A   | 5.79E-07 | -1.88727 | SCML2                | 0.0001445  | 1.50335 | CCPG1          | 0.00026576 | 1.51976 |
| RFC1     | 5.54E-05 | -1.88678 | ---                  | 0.0015732  | 1.50392 | CLIP1          | 0.00034987 | 1.51979 |
| RNF26    | 4.57E-07 | -1.88545 | GPR137C              | 0.00145914 | 1.50395 | IDH1           | 1.35E-05   | 1.5199  |
| C9orf126 | 0.00014  | -1.88542 | ---                  | 0.00050463 | 1.50403 | ARC N1         | 9.69E-06   | 1.51996 |
| WDR51A   | 7.94E-05 | -1.88455 | DUSP2                | 6.05E-06   | 1.50405 | SLC2A6         | 1.08E-05   | 1.52001 |
| ---      | 5.10E-05 | -1.88419 | C18orf25             | 0.0331104  | 1.50435 | ASCC3          | 0.00025908 | 1.52005 |
| SOLH     | 1.21E-05 | -1.88337 | KIAA0256             | 0.014108   | 1.50448 | DDEFL1         | 0.0108919  | 1.5201  |
| TMEM40   | 0.00173  | -1.88308 | OGFR                 | 6.63E-06   | 1.50458 | LL22NC03-5H6.5 | 0.00856831 | 1.52067 |
| XK       | 0.00658  | -1.88227 | CHM                  | 0.0732088  | 1.50508 | RHOV           | 0.00015852 | 1.52088 |
| ASCL1    | 5.33E-08 | -1.88227 | C2orf34              | 0.00763038 | 1.50552 | TIGD2          | 0.00079806 | 1.52104 |
| ---      | 0.00319  | -1.8818  | FAM98B               | 0.00035071 | 1.5056  | C14orf179      | 2.24E-06   | 1.52115 |
| MNS1     | 4.42E-05 | -1.88138 | SULT1A2              | 1.01E-05   | 1.50602 | ---            | 8.06E-05   | 1.52156 |
| ESR1     | 0.00035  | -1.88137 | COPS8                | 6.22E-06   | 1.50608 | MMEL1          | 0.00012546 | 1.52209 |
| SUZ12    | 9.72E-08 | -1.88102 | SAT2                 | 5.10E-06   | 1.50623 | RBKS           | 0.00103926 | 1.52217 |
| LOC81691 | 0.00254  | -1.88098 | IGFBP5               | 3.15E-05   | 1.50643 | PKIA           | 0.0005007  | 1.52289 |
| DDX11    | 1.33E-06 | -1.88082 | SLC7A6 /// TRPV6     | 7.89E-07   | 1.50646 | PCYT2          | 0.00023944 | 1.52293 |
| MET      | 2.15E-05 | -1.8805  | FLRT3                | 0.0285152  | 1.50648 | C9orf52        | 0.00510916 | 1.52297 |
| PTP4A2   | 2.50E-10 | -1.88026 | ONECUT2              | 0.102395   | 1.50657 | COMTD1         | 0.00013223 | 1.52313 |
| FANCD2   | 0.00011  | -1.88023 | BLOC1S2              | 3.87E-06   | 1.50716 | CLEC7A         | 0.0231975  | 1.52329 |
| ---      | 0.00041  | -1.87982 | C17orf59             | 1.67E-05   | 1.50769 | C9orf95        | 3.61E-06   | 1.52372 |
| EEF2K    | 3.05E-05 | -1.87972 | PRR7                 | 5.66E-06   | 1.50824 | MAN1A1         | 8.54E-05   | 1.52377 |
| ---      | 2.03E-05 | -1.87962 | NSF                  | 1.13E-05   | 1.50828 | ---            | 0.0139003  | 1.52396 |
| RAD9A    | 9.60E-06 | -1.87955 | GFPT1                | 6.67E-05   | 1.50855 | SERPINB1       | 0.00323499 | 1.52423 |
| ARSD     | 9.41E-06 | -1.87928 | NTHL1                | 0.00913911 | 1.50892 | RNASEH2C       | 1.38E-06   | 1.52432 |
| FBXO2    | 4.42E-06 | -1.87889 | PIK3C2A              | 0.0176379  | 1.50898 | KLC2           | 3.63E-05   | 1.52456 |
| MAGI1    | 0.00041  | -1.8781  | FSTL3                | 0.0581079  | 1.50919 | TIMP1          | 2.59E-06   | 1.52517 |
| LRP5     | 0.00016  | -1.87788 | FAM45A /// FAM45B    | 8.17E-06   | 1.5093  | SEMA4C         | 3.83E-06   | 1.52524 |
| POLR2K   | 8.15E-09 | -1.8777  | GTF3C1               | 3.53E-08   | 1.50945 | PARVA          | 0.00021631 | 1.52536 |
| MCM4     | 5.18E-05 | -1.87678 | RFK                  | 0.00010465 | 1.5095  | FAM55C         | 3.52E-05   | 1.52544 |
| GMNN     | 5.49E-09 | -1.87485 | SERTAD1              | 0.00021963 | 1.50958 | STRA6          | 0.0050951  | 1.52637 |
| GOLGA7   | 2.16E-05 | -1.874   | KIAA1033             | 7.97E-08   | 1.50989 | SLC25A17       | 0.0148218  | 1.52777 |
| SLC22A15 | 0.00442  | -1.87361 | EPB41L2              | 0.0005093  | 1.50992 | JUN            | 2.24E-05   | 1.52795 |
| HADH     | 6.24E-07 | -1.8735  | DUSP14               | 1.37E-06   | 1.50995 | ---            | 0.00048823 | 1.52806 |
| CA5BL    | 8.31E-06 | -1.87331 | SLC38A6              | 4.69E-05   | 1.51022 | SAR1B          | 7.63E-05   | 1.52834 |
| TMEM44   | 0.00248  | -1.87272 | ---                  | 0.00590566 | 1.51023 | MTHFS /// ST20 | 1.48E-06   | 1.52838 |
| FUS      | 4.01E-06 | -1.87272 | GRPEL1               | 4.71E-05   | 1.51061 | GTF3C1         | 7.86E-06   | 1.52846 |
| ---      | 1.61E-08 | -1.87271 | SRPRB                | 0.00010928 | 1.51062 | LMBR1L         | 1.24E-05   | 1.52902 |
| FKBP5    | 2.30E-06 | -1.8727  | PSMG4                | 6.33E-06   | 1.51093 | PPAP2B         | 0.00159601 | 1.5292  |
| FOXRED2  | 0.00011  | -1.87078 | NP32A /// LOC1001281 | 4.64E-05   | 1.51103 | LOC441150      | 0.00394354 | 1.52981 |
| NR2F2    | 0.00025  | -1.87073 | SLCO3A1              | 0.0098232  | 1.51118 | TSPYL2         | 5.09E-05   | 1.52986 |
| MYBL1    | 3.98E-08 | -1.87058 | C1orf86              | 0.00088187 | 1.5118  | ---            | 0.00012278 | 1.52989 |
| DCK      | 3.04E-05 | -1.86995 | C100134295 /// SLCO4 | 0.00021623 | 1.51188 | LEPR           | 0.0832934  | 1.53027 |
| SYT7     | 1.70E-05 | -1.86992 | PRKRIP1              | 1.88E-07   | 1.51203 | FAM92A1        | 5.65E-05   | 1.53108 |
| SRD5A1   | 3.32E-08 | -1.86885 | ---                  | 1.18E-05   | 1.5123  | LOC100129105   | 0.00032956 | 1.53163 |

|                       |          |          |                     |            |         |                     |            |         |
|-----------------------|----------|----------|---------------------|------------|---------|---------------------|------------|---------|
| EHMT2                 | 3.06E-05 | -1.8682  | ATP6V0E2            | 4.92E-06   | 1.51232 | C9orf58             | 4.07E-06   | 1.53173 |
| ORC6L                 | 5.85E-05 | -1.86817 | SERTAD2             | 0.00067325 | 1.51242 | FAM55C              | 0.0102901  | 1.53178 |
| ORC3L                 | 1.02E-07 | -1.86806 | ATP2C2              | 4.22E-05   | 1.51286 | QPRT                | 3.53E-05   | 1.5319  |
| ALDH6A1               | 8.16E-09 | -1.86805 | ---                 | 0.00782796 | 1.51308 | PC                  | 0.00078134 | 1.53252 |
| MTMR11                | 8.00E-07 | -1.86795 | SEC24A              | 0.00363551 | 1.51344 | B3GNT4              | 0.00139132 | 1.53398 |
| ---                   | 0.00317  | -1.8679  | SLC25A33            | 2.73E-06   | 1.51349 | PBX1                | 0.00022056 | 1.53413 |
| TRIP13                | 2.16E-07 | -1.86717 | CDC23               | 0.00302645 | 1.51409 | CENTA1              | 8.72E-05   | 1.53429 |
| NECAB1                | 2.96E-06 | -1.86628 | ---                 | 0.0099971  | 1.51446 | GTPBP5              | 0.00045746 | 1.53532 |
| HPS4                  | 0.00173  | -1.86557 | AGPAT3              | 0.00028826 | 1.51453 | CD151               | 4.15E-06   | 1.53538 |
| SDHC                  | 7.86E-05 | -1.86504 | TMEM57              | 0.00110516 | 1.51469 | RFK                 | 7.86E-05   | 1.5355  |
| OSBPL7                | 4.14E-06 | -1.86433 | UBAC2               | 8.23E-06   | 1.5148  | PCSK6               | 0.00139004 | 1.53566 |
| C21orf45              | 1.51E-06 | -1.86361 | ARPM1               | 0.0119132  | 1.51497 | ATE1                | 8.69E-05   | 1.5364  |
| PARP11                | 0.00015  | -1.86328 | PPAPDC1B            | 5.90E-07   | 1.51524 | MAOA                | 0.00037835 | 1.53669 |
| WDR8                  | 4.92E-06 | -1.86242 | IDH1                | 1.42E-05   | 1.51554 | GBP2                | 2.33E-05   | 1.53685 |
| ---                   | 0.00077  | -1.86228 | JMJD6               | 3.41E-05   | 1.51598 | LRPAP1              | 2.85E-07   | 1.53703 |
| YBX2                  | 1.45E-06 | -1.86201 | RXRA                | 0.00019417 | 1.51609 | LIFR                | 0.0272887  | 1.53708 |
| ITSN1                 | 0.00017  | -1.86195 | P2RX2               | 0.00176056 | 1.51612 | CNNM4               | 1.48E-05   | 1.53746 |
| TROAP                 | 1.82E-06 | -1.86178 | RHOU                | 0.00016494 | 1.51613 | C6orf154            | 0.0005415  | 1.538   |
| FEN1                  | 6.08E-06 | -1.86129 | TICAM2 /// TMED7    | 0.00714251 | 1.51619 | SUSD4               | 0.00029187 | 1.53817 |
| ---                   | 1.69E-05 | -1.86059 | C9orf52             | 0.00541176 | 1.51621 | C20orf112           | 4.98E-08   | 1.5384  |
| LOC644192             | 1.74E-05 | -1.86059 | SCRN2               | 4.64E-06   | 1.51672 | THAP5               | 0.00153168 | 1.53863 |
| MTA3                  | 0.00052  | -1.86031 | C6orf52             | 0.00069467 | 1.51676 | KIAA1429            | 0.0144957  | 1.53865 |
| ---                   | 0.00675  | -1.86022 | INTS6               | 4.74E-05   | 1.51678 | MMAA                | 0.00221211 | 1.53888 |
| ABHD3                 | 2.74E-06 | -1.85979 | C6orf66             | 0.00024817 | 1.51703 | TBC1D8              | 7.31E-05   | 1.5389  |
| ---                   | 4.89E-07 | -1.85932 | ID1                 | 3.31E-07   | 1.51726 | USP45               | 0.0010159  | 1.53894 |
| KIAA1377              | 0.00877  | -1.85902 | C100128414 /// RAD5 | 0.0010648  | 1.51783 | RCBTB1              | 0.00474711 | 1.53989 |
| PSKH1                 | 0.00882  | -1.85829 | tcag7.1314          | 0.00080956 | 1.5181  | LGALS8              | 0.00570548 | 1.5399  |
| LMNB2                 | 3.20E-05 | -1.85803 | RNF166              | 4.46E-06   | 1.51833 | MRC2                | 0.00728746 | 1.54002 |
| ADAT3                 | 0.00127  | -1.85781 | BAT2D1              | 0.00062402 | 1.5187  | C100129068 /// ST3G | 3.34E-05   | 1.54009 |
| ---                   | 7.53E-07 | -1.85726 | ATG16L1             | 9.87E-06   | 1.51876 | ELL                 | 0.0401056  | 1.54027 |
| ESR1                  | 3.02E-06 | -1.85626 | HPS3                | 3.83E-05   | 1.51893 | SCRN2               | 3.52E-06   | 1.54045 |
| ---                   | 0.0002   | -1.85602 | LRRC16A             | 0.00551435 | 1.51902 | RPAP3               | 2.39E-05   | 1.54053 |
| PRIM2                 | 5.80E-05 | -1.85572 | NUDT4 /// NUDT4P1   | 0.0007363  | 1.51962 | ZFAND2A             | 1.84E-05   | 1.54071 |
| ECHDC2                | 3.26E-05 | -1.85565 | C12orf29            | 3.38E-05   | 1.51979 | MTRF1               | 0.00305513 | 1.54125 |
| SMTN                  | 7.56E-05 | -1.85535 | CDC42EP5            | 0.00106691 | 1.52014 | EIF2AK2             | 8.64E-06   | 1.54158 |
| 43287 /// PTMA /// PT | 1.71E-06 | -1.85497 | RNASEH2C            | 1.45E-06   | 1.52017 | PECI                | 4.54E-07   | 1.54162 |
| ANKIB1                | 2.70E-07 | -1.85471 | RAB28               | 0.00013487 | 1.52036 | CHIC1               | 0.0170368  | 1.54165 |
| ARHGAP11A             | 0.00139  | -1.85462 | C2orf60             | 1.53E-05   | 1.5205  | FGFR4               | 0.0205036  | 1.54205 |
| ADPGK                 | 1.51E-08 | -1.85333 | FNBP1L              | 0.0021163  | 1.52105 | ANKRD13C            | 0.0171447  | 1.54236 |
| ---                   | 1.95E-05 | -1.85326 | CENTB2              | 0.00036365 | 1.52168 | LPIN2               | 0.00020612 | 1.54261 |
| SLC2A4RG              | 2.57E-07 | -1.85311 | SOX2                | 1.91E-05   | 1.52174 | ---                 | 0.00382854 | 1.54275 |
| COL12A1               | 0.02403  | -1.85305 | RPS27L              | 3.55E-06   | 1.52196 | PUS10               | 0.0100299  | 1.5434  |
| RTN3                  | 5.02E-07 | -1.85275 | C22orf9             | 0.00096745 | 1.52245 | ---                 | 0.0145016  | 1.54344 |
| RPH3AL                | 1.46E-05 | -1.8514  | HLA-G               | 3.11E-07   | 1.5227  | MID1IP1             | 2.71E-05   | 1.54351 |
| PTPN1                 | 6.35E-07 | -1.85101 | PPT2                | 0.00331838 | 1.52273 | SEMA3F              | 0.003923   | 1.54388 |
| ---                   | 7.20E-06 | -1.85087 | STCH                | 3.17E-05   | 1.52277 | LITAF               | 1.10E-05   | 1.54403 |
| ---                   | 6.14E-06 | -1.84945 | FGFR4               | 0.0385234  | 1.52303 | AGA                 | 1.08E-05   | 1.54408 |
| CDC25B                | 6.42E-07 | -1.84941 | SSSCA1              | 6.52E-05   | 1.52309 | MSMB                | 0.0196199  | 1.54409 |
| PTPN9                 | 1.16E-06 | -1.84914 | MRPL19              | 0.0154259  | 1.5234  | SEC23B              | 0.00012771 | 1.54421 |

|          |          |          |                     |            |         |                       |            |         |
|----------|----------|----------|---------------------|------------|---------|-----------------------|------------|---------|
| PDXK     | 4.62E-09 | -1.84776 | ASCC3               | 0.00180509 | 1.52373 | GLG1                  | 0.0171817  | 1.54426 |
| RET      | 1.39E-05 | -1.84772 | JUN                 | 2.34E-05   | 1.52397 | GPR160                | 2.26E-07   | 1.54505 |
| FLJ90757 | 2.31E-05 | -1.84771 | RPS6KC1             | 0.02377    | 1.52469 | OTUB2                 | 0.0786235  | 1.54555 |
| ---      | 0.00035  | -1.8475  | CAB39               | 0.00170345 | 1.5251  | ARL8B                 | 8.41E-08   | 1.54699 |
| TAF9B    | 6.35E-05 | -1.84678 | NOTCH1              | 0.00039974 | 1.52518 | SGSH                  | 1.44E-05   | 1.54702 |
| BTBD3    | 2.09E-05 | -1.84638 | BAT2D1              | 1.72E-05   | 1.52527 | KIF16B                | 0.0147526  | 1.54729 |
| NQO2     | 1.43E-07 | -1.84593 | NQO1                | 2.40E-08   | 1.52538 | LOC647121             | 1.82E-05   | 1.54765 |
| LMNB1    | 1.61E-07 | -1.8454  | TAPBPL              | 0.00382733 | 1.52539 | UQCC                  | 0.00038625 | 1.54847 |
| NPAL3    | 0.0004   | -1.84527 | LMF1                | 1.20E-05   | 1.52548 | FLJ22167              | 0.00151998 | 1.54857 |
| NR2F2    | 3.31E-05 | -1.84512 | WDFY2               | 0.00010743 | 1.52595 | SLC7A6 /// TRPV6      | 0.00066566 | 1.54926 |
| CCNA2    | 3.07E-06 | -1.8446  | GABPB2              | 2.37E-06   | 1.52604 | C17orf59              | 1.03E-05   | 1.54967 |
| FANCA    | 2.89E-06 | -1.84363 | MDK                 | 4.50E-06   | 1.52615 | MTF2                  | 0.00010925 | 1.5497  |
| FBXO7    | 3.58E-07 | -1.84184 | UBE2W               | 0.00055763 | 1.52706 | C20orf54              | 0.00249389 | 1.54972 |
| ---      | 0.00077  | -1.84174 | LHX2                | 0.00201233 | 1.52741 | MLX                   | 7.78E-08   | 1.54978 |
| ---      | 0.0003   | -1.84146 | WIBG                | 4.97E-05   | 1.52774 | /// RGPLD5 /// RGPLD6 | 5.57E-06   | 1.54988 |
| ---      | 7.38E-05 | -1.84111 | CHD5                | 0.0247217  | 1.52844 | PDXK                  | 3.25E-06   | 1.55025 |
| DDX11    | 1.01E-05 | -1.841   | IMPAD1              | 1.68E-06   | 1.52867 | TRAK1                 | 0.00111893 | 1.5504  |
| RASSF8   | 1.49E-06 | -1.84097 | GDPD1               | 3.44E-05   | 1.5292  | SAMD11                | 0.00123854 | 1.55048 |
| RFC3     | 4.99E-08 | -1.84056 | ---                 | 0.0180596  | 1.52957 | RABAC1                | 2.96E-06   | 1.55068 |
| DUSP18   | 0.00021  | -1.83955 | KDEL1               | 0.116142   | 1.52969 | TNRC8                 | 0.00060826 | 1.55109 |
| CBL      | 0.00066  | -1.83888 | RRAS2               | 1.39E-06   | 1.52977 | MTUS1                 | 0.00011271 | 1.5511  |
| SMAD2    | 0.00058  | -1.83849 | FGFR1OP2            | 6.33E-05   | 1.52979 | SLC1A1                | 0.00737638 | 1.55139 |
| VTI1B    | 4.71E-07 | -1.83828 | CTTN                | 6.28E-07   | 1.52984 | ---                   | 0.0352141  | 1.55161 |
| ZNF185   | 3.50E-05 | -1.83741 | BGLAP /// PMF1      | 0.042431   | 1.53001 | ING1                  | 1.62E-05   | 1.55187 |
| ARFIP1   | 1.37E-06 | -1.83741 | ---                 | 0.00435415 | 1.5302  | AHNAK                 | 0.00046123 | 1.55187 |
| PWP1     | 2.91E-09 | -1.83681 | FLJ11151            | 0.0001966  | 1.53039 | SLC38A6               | 2.95E-05   | 1.55216 |
| MICALL2  | 0.00039  | -1.8367  | LEPR                | 0.0832242  | 1.53045 | TGFA                  | 0.00301504 | 1.55218 |
| C1orf135 | 0.00011  | -1.83619 | UQCC                | 0.00046167 | 1.53051 | TBC1D9                | 1.68E-05   | 1.55235 |
| S100A8   | 2.93E-06 | -1.8361  | C1orf79             | 0.00010886 | 1.53137 | CCDC68                | 0.00822735 | 1.55259 |
| SLC35B4  | 0.01711  | -1.83525 | M189-UBE2V1 /// UB  | 8.26E-06   | 1.53156 | FBXO3                 | 0.00392165 | 1.55308 |
| KIAA0280 | 2.24E-06 | -1.83287 | C1orf96             | 0.0534944  | 1.53173 | SEC22B                | 0.0001102  | 1.55353 |
| BCL7A    | 0.00109  | -1.83194 | SAR1B               | 3.67E-06   | 1.53185 | PPFIBP2               | 0.00028772 | 1.55449 |
| CCNY     | 4.22E-07 | -1.8317  | IFRD1               | 0.00010984 | 1.53196 | RRN3                  | 0.00088705 | 1.55474 |
| ---      | 0.00015  | -1.8315  | CLIP1               | 0.0005714  | 1.53217 | IRF7                  | 6.69E-06   | 1.55476 |
| ANKLE2   | 0.00046  | -1.83115 | IGFBP5              | 0.0574628  | 1.53225 | CD58                  | 8.33E-06   | 1.55488 |
| SYNCRIP  | 6.81E-08 | -1.83113 | ATRIP /// TREX1     | 6.39E-06   | 1.53246 | HEATR5A               | 0.00117623 | 1.55515 |
| CKLF     | 4.53E-06 | -1.83105 | SAR1A               | 9.10E-06   | 1.53304 | TMEM191A              | 4.82E-05   | 1.55578 |
| DLEU2    | 1.16E-05 | -1.83092 | ZNF557              | 0.0126636  | 1.53318 | MSI2                  | 8.46E-06   | 1.55646 |
| MCAM     | 9.20E-07 | -1.83013 | M1 /// CALM2 /// CA | 1.36E-05   | 1.53397 | TRAPPC5               | 1.55E-05   | 1.55691 |
| GNPNAT1  | 1.83E-07 | -1.82969 | SUSD1               | 0.0219971  | 1.53433 | BAX                   | 1.55E-05   | 1.55773 |
| PRPS2    | 1.70E-05 | -1.8289  | ---                 | 0.00028042 | 1.53468 | TncRNA                | 0.00648333 | 1.55847 |
| LSM5     | 3.53E-05 | -1.82861 | SELI                | 4.74E-06   | 1.53478 | PRKD2                 | 6.82E-06   | 1.55848 |
| SLC29A1  | 0.00021  | -1.82823 | LPPR2               | 8.33E-05   | 1.53488 | SHISA5                | 2.82E-06   | 1.55923 |
| RIMS3    | 0.00449  | -1.82762 | ACTR8               | 0.00050404 | 1.53493 | BACE2                 | 0.00024853 | 1.55985 |
| NRF1     | 0.00045  | -1.82739 | SCCPDH              | 1.35E-05   | 1.53563 | SMURF1                | 0.00858857 | 1.56013 |
| ---      | 0.00024  | -1.82738 | VAMP5               | 0.0113656  | 1.53568 | ARPC4 /// TTLL3       | 0.00286746 | 1.56151 |
| CSK      | 6.89E-08 | -1.82672 | TRIM47              | 0.0183424  | 1.53573 | ---                   | 0.00609445 | 1.56244 |
| ---      | 0.00172  | -1.82641 | BAT2D1              | 0.00029817 | 1.53578 | TMC4                  | 9.24E-07   | 1.56323 |
| TWSG1    | 0.00274  | -1.82627 | C1orf102            | 0.00034042 | 1.53586 | ING3                  | 0.00774928 | 1.56345 |

|                    |          |          |                      |            |         |                   |            |         |
|--------------------|----------|----------|----------------------|------------|---------|-------------------|------------|---------|
| MSRB2              | 5.13E-06 | -1.8262  | B4GALT4              | 0.00034934 | 1.53606 | IDUA              | 1.29E-05   | 1.56368 |
| ---                | 1.24E-05 | -1.82523 | EPOR                 | 0.00520758 | 1.53614 | C1orf115          | 2.84E-05   | 1.56405 |
| JARID2             | 3.12E-08 | -1.82443 | LOC653602            | 0.0119458  | 1.53641 | EPOR              | 0.0312062  | 1.56414 |
| CAPN2              | 1.29E-07 | -1.82409 | ABCD1                | 0.00279874 | 1.53767 | AP4S1             | 0.00069707 | 1.56491 |
| ---                | 1.07E-05 | -1.82406 | HLA-A                | 3.55E-08   | 1.53865 | KIF1B             | 0.00056524 | 1.56544 |
| MCM4               | 1.89E-06 | -1.82378 | BNIP1                | 0.00047315 | 1.53886 | BMPR2             | 0.00018157 | 1.56547 |
| SLC46A3            | 0.00307  | -1.8231  | CEP170               | 0.00449424 | 1.53891 | NUDT4 /// NUDT4P1 | 0.00047203 | 1.56548 |
| C8orf44 /// SGK3   | 2.14E-05 | -1.82191 | LSS                  | 0.0315597  | 1.53904 | ---               | 0.0250981  | 1.56575 |
| GSTCD              | 0.00066  | -1.82187 | B3GNT2               | 4.43E-05   | 1.5391  | KIAA0999          | 0.0034352  | 1.56596 |
| ---                | 0.01609  | -1.82132 | TBC1D8               | 7.29E-05   | 1.53913 | C12orf57          | 3.02E-05   | 1.5662  |
| ---                | 0.00036  | -1.821   | LARP6                | 0.00014164 | 1.53917 | BCL3              | 3.56E-07   | 1.56634 |
| LHX2               | 0.00109  | -1.81943 | orf78 /// LOC1001339 | 0.00206423 | 1.53971 | BAT2D1            | 4.84E-05   | 1.56699 |
| PXDN               | 8.91E-07 | -1.81938 | TP53INP2             | 0.00010829 | 1.53976 | QSOX1             | 5.38E-06   | 1.56706 |
| BICD2              | 6.34E-06 | -1.81922 | CNNM1                | 0.166653   | 1.54054 | LITAF             | 1.62E-06   | 1.56713 |
| DONSON             | 4.50E-06 | -1.81907 | PPAP2B               | 0.00143695 | 1.54055 | FGFR1OP2          | 0.00014992 | 1.56714 |
| ABI2               | 1.52E-06 | -1.81856 | ---                  | 0.0424185  | 1.54055 | C10orf47          | 0.00012428 | 1.56714 |
| SLC44A2            | 2.85E-08 | -1.81819 | DLG3                 | 0.00020895 | 1.54065 | BNIP1             | 2.74E-05   | 1.56795 |
| SHKBP1             | 1.93E-06 | -1.81815 | TMEM128              | 1.77E-05   | 1.54073 | BTG3              | 7.58E-06   | 1.56841 |
| HIP1               | 4.01E-06 | -1.81756 | PSD3                 | 2.19E-05   | 1.54074 | YRDC              | 7.34E-05   | 1.56845 |
| CMTM3              | 0.00244  | -1.81669 | AGPAT9               | 0.00037848 | 1.54106 | NCK2              | 1.64E-05   | 1.56848 |
| FBXL10             | 5.17E-09 | -1.81653 | DPH3                 | 7.85E-08   | 1.54111 | MID2              | 9.80E-06   | 1.56891 |
| GLUL               | 5.12E-07 | -1.81598 | NKRD23 /// ANKRD3    | 0.00181882 | 1.54142 | FAM18B            | 9.63E-05   | 1.56913 |
| GART               | 2.41E-06 | -1.8157  | FECH                 | 0.00018668 | 1.54192 | GATA6             | 0.00171731 | 1.56947 |
| SRD5A1             | 2.00E-05 | -1.81483 | MALT1                | 0.00325979 | 1.54208 | ---               | 0.012702   | 1.56957 |
| RNFT2              | 0.00018  | -1.81449 | UBE2W                | 0.00064454 | 1.54219 | MTSS1             | 4.58E-05   | 1.56992 |
| TTC17              | 0.00011  | -1.81449 | MAP3K8               | 0.00482192 | 1.5425  | ATP6V0E2          | 2.54E-06   | 1.57036 |
| MYO19              | 7.82E-06 | -1.81441 | TTC7B                | 0.00051003 | 1.54265 | NAMPT             | 0.00019799 | 1.57038 |
| LIN52              | 1.00E-06 | -1.8142  | CTNBL1               | 1.82E-05   | 1.54276 | ZNF182 /// ZNF630 | 0.00061586 | 1.57069 |
| ARPC1A             | 8.14E-09 | -1.81374 | LOC100130097         | 0.0271706  | 1.54294 | TNS1              | 1.43E-06   | 1.57191 |
| ---                | 0.05797  | -1.81373 | ETV6                 | 0.00016403 | 1.54335 | ZNF770            | 1.63E-05   | 1.5722  |
| ATPIA1             | 1.57E-09 | -1.8137  | PML                  | 6.57E-05   | 1.54348 | PML               | 6.83E-05   | 1.57223 |
| PGD                | 9.02E-08 | -1.81273 | CEP170               | 0.00211868 | 1.54385 | CTTN              | 3.88E-07   | 1.57224 |
| GPBR               | 2.39E-08 | -1.81252 | ACOX3                | 0.00097713 | 1.54393 | TWF1              | 0.1036     | 1.57243 |
| RMI1               | 2.95E-07 | -1.81248 | KIF3A                | 0.00072786 | 1.54432 | ENC1              | 0.00019066 | 1.57253 |
| PABPC4L            | 0.00029  | -1.81185 | MAP2K1               | 2.85E-05   | 1.54456 | DOCK8             | 0.029159   | 1.57267 |
| ---                | 1.22E-05 | -1.81139 | IDH3A                | 1.10E-06   | 1.54463 | ATP6V0E1          | 0.00046938 | 1.57268 |
| WDR1               | 0.00018  | -1.81072 | SRCAP                | 5.14E-07   | 1.54496 | TMEM65            | 4.38E-06   | 1.57342 |
| BAG1               | 0.00029  | -1.8102  | NPHP1                | 0.00045305 | 1.54509 | CTSB              | 1.85E-07   | 1.57372 |
| IAA0746 /// SERINC | 0.00132  | -1.8101  | BMP4                 | 9.25E-05   | 1.54559 | BHLHB2            | 0.00280567 | 1.57396 |
| DVL3               | 0.00052  | -1.80997 | HLA-J                | 0.00044774 | 1.54583 | SEN2              | 1.73E-05   | 1.57426 |
| ---                | 0.00137  | -1.80981 | LOC100130536         | 0.00786245 | 1.54595 | THEM4             | 0.00124226 | 1.5743  |
| RFX5               | 2.02E-08 | -1.80951 | ALKBH7               | 3.73E-05   | 1.54615 | SUCLG2            | 6.29E-05   | 1.57435 |
| PAN2               | 1.85E-05 | -1.80943 | EXOC2                | 3.16E-05   | 1.54673 | ETV6              | 0.00011999 | 1.57457 |
| LOC643358 /// LOC7 | 0.00217  | -1.80927 | LOC441150            | 0.00341183 | 1.54687 | MLX               | 7.28E-06   | 1.57463 |
| SRD5A1             | 2.60E-08 | -1.80906 | GFM1                 | 2.99E-05   | 1.5473  | GDPD5             | 9.35E-05   | 1.57466 |
| RICS               | 1.31E-05 | -1.8089  | SH3BGR13             | 5.84E-05   | 1.54731 | HPSE              | 0.0247103  | 1.57558 |
| LOC727738          | 0.03576  | -1.80857 | DCBLD1               | 2.36E-05   | 1.54738 | HDHD3             | 1.61E-05   | 1.57569 |
| ITPR3              | 3.85E-08 | -1.80823 | EID1                 | 0.00012694 | 1.54789 | HACE1             | 0.00760035 | 1.57663 |
| STX6               | 1.46E-06 | -1.80772 | ORMDL3               | 0.00042357 | 1.54824 | RXRA              | 0.00010356 | 1.57722 |

|                    |          |          |                      |            |         |                      |            |         |
|--------------------|----------|----------|----------------------|------------|---------|----------------------|------------|---------|
| ARID2              | 0.00048  | -1.8077  | PDIA5                | 1.04E-06   | 1.54847 | C100130633 /// ZMY   | 5.17E-06   | 1.57748 |
| PPIF               | 3.92E-08 | -1.8073  | TRIM5                | 0.0006869  | 1.54931 | KIAA0241             | 0.00015447 | 1.57754 |
| ACSF2              | 3.30E-06 | -1.80683 | IMPA1                | 1.75E-06   | 1.54951 | CDYL                 | 1.11E-06   | 1.57758 |
| NPHP3              | 0.00226  | -1.80478 | BMP7                 | 5.62E-06   | 1.54995 | TSC22D3              | 0.00092417 | 1.57793 |
| PEMT               | 1.11E-06 | -1.80449 | CDYL                 | 2.19E-06   | 1.55016 | ZNHIT3               | 1.99E-06   | 1.57926 |
| SMTN               | 8.06E-06 | -1.80446 | SMAD1                | 0.00243996 | 1.55039 | ARPC4 /// TTLL3      | 6.34E-05   | 1.57968 |
| INCENP             | 0.00047  | -1.80407 | C1orf55              | 0.00933272 | 1.55043 | PACSIN1              | 0.0171387  | 1.57997 |
| DKK1               | 1.18E-06 | -1.80396 | GBP2                 | 2.01E-05   | 1.55047 | LSS                  | 0.0245976  | 1.58062 |
| POM121 /// POM121C | 1.78E-06 | -1.80395 | B3GNT4               | 0.00119457 | 1.55052 | SHC4                 | 0.00080513 | 1.58067 |
| ---                | 3.72E-05 | -1.80394 | C22orf9              | 0.071503   | 1.55101 | APOO                 | 7.51E-06   | 1.58136 |
| SYNE2              | 0.00021  | -1.80349 | SUMO1                | 0.0388781  | 1.55116 | ACBD4                | 0.0384257  | 1.58179 |
| AGBL5              | 8.67E-05 | -1.80304 | DC100131612 /// MED  | 0.00397366 | 1.55127 | SHANK2               | 0.0134388  | 1.58204 |
| ANKRD5             | 0.0001   | -1.80193 | ---                  | 2.38E-05   | 1.55148 | LOC100130506         | 0.00072723 | 1.58237 |
| ZNF573             | 6.43E-05 | -1.80189 | ANKRD13C             | 0.0160813  | 1.55176 | SLC35D2              | 3.15E-06   | 1.58252 |
| PWWP2A             | 5.29E-05 | -1.80101 | MID1IP1              | 2.47E-05   | 1.55221 | SOAT1                | 0.00250711 | 1.58257 |
| CKLF               | 3.13E-07 | -1.8009  | GIYD2 /// SULT1A3 // | 2.69E-05   | 1.55237 | TWIST1               | 0.00106002 | 1.5829  |
| IQCK               | 1.61E-06 | -1.80041 | TNFAIP3              | 3.07E-05   | 1.55241 | IFI35                | 1.15E-06   | 1.58299 |
| MAP4               | 2.64E-07 | -1.79948 | ZFYVE19              | 2.95E-06   | 1.55249 | C9orf58              | 0.00015879 | 1.58421 |
| C18orf54           | 0.00095  | -1.79897 | C1orf108             | 4.93E-07   | 1.55261 | LIMA1                | 0.00035893 | 1.58469 |
| SUV39H2            | 6.22E-07 | -1.79886 | ELL                  | 0.037321   | 1.55287 | PPIL4                | 0.00193323 | 1.58547 |
| CLEC7A             | 3.86E-05 | -1.79879 | C3orf23              | 0.00105784 | 1.55297 | CCDC126              | 0.00257025 | 1.5857  |
| CCDC109B           | 3.89E-06 | -1.79862 | SCCPDH               | 7.21E-08   | 1.55333 | C6orf52              | 0.00035748 | 1.58588 |
| TMEM194            | 2.82E-08 | -1.79829 | ALG10                | 0.00133055 | 1.55342 | PD5 /// RGPD6 /// RG | 1.32E-05   | 1.58647 |
| FAM120AOS          | 8.04E-05 | -1.79819 | FAM130A1             | 0.0008933  | 1.55358 | FAM5B                | 0.02075    | 1.58648 |
| PTMA               | 3.64E-06 | -1.79793 | ALKBH7               | 0.0005075  | 1.55407 | MED14                | 0.0632227  | 1.58696 |
| MCM8               | 0.00033  | -1.79776 | CGRRF1               | 9.78E-07   | 1.55412 | ATP2A3               | 0.00955866 | 1.58703 |
| APC                | 0.01818  | -1.79768 | TTC9                 | 0.00034272 | 1.55432 | C17orf91             | 0.00175478 | 1.58747 |
| MET                | 4.12E-05 | -1.79715 | CDYL                 | 1.43E-06   | 1.55452 | ---                  | 1.46E-05   | 1.58758 |
| PSMC3IP            | 2.16E-05 | -1.79714 | Gcom1 /// GRINL1A    | 2.68E-05   | 1.55484 | ANXA7                | 8.88E-06   | 1.58849 |
| MT1F               | 0.00012  | -1.7971  | CAPS                 | 0.00475404 | 1.55515 | ---                  | 5.07E-06   | 1.58879 |
| LOC201725          | 0.0002   | -1.79671 | MLX                  | 8.92E-06   | 1.55557 | ATP2A3               | 0.0011632  | 1.58917 |
| CA2                | 9.23E-08 | -1.79668 | LPGAT1               | 9.14E-05   | 1.55571 | SCN1B                | 0.00030285 | 1.58924 |
| MCM4               | 0.00016  | -1.79595 | FAM55C               | 2.53E-05   | 1.55583 | ABCC3                | 0.00107291 | 1.58939 |
| ---                | 6.51E-07 | -1.79592 | YIF1B                | 0.00169034 | 1.55633 | PHLDA3               | 0.00022004 | 1.58953 |
| TRIOBP             | 0.0092   | -1.79553 | C6orf154             | 0.00045171 | 1.55672 | NPNT                 | 0.0225257  | 1.58978 |
| IPP                | 9.30E-05 | -1.7955  | ITCH                 | 0.00141842 | 1.55751 | ---                  | 0.00690464 | 1.59008 |
| TAF1B              | 8.91E-06 | -1.79386 | EPB41L5              | 2.71E-07   | 1.55763 | C100131062 /// PTP4  | 0.0312315  | 1.59023 |
| PAFAH1B3           | 1.90E-07 | -1.79372 | PUS10                | 0.00031667 | 1.55833 | COL6A2               | 0.0171716  | 1.59025 |
| LEPR               | 0.00262  | -1.79299 | HCCS                 | 6.33E-06   | 1.55839 | ONECUT2              | 0.00587401 | 1.59207 |
| KIAA1333           | 2.12E-07 | -1.79267 | PDCD4                | 3.60E-06   | 1.55919 | LACTB                | 0.00043549 | 1.59244 |
| ---                | 0.01896  | -1.79238 | ---                  | 4.68E-05   | 1.5592  | FAH                  | 0.00018636 | 1.59247 |
| TMEM37             | 0.00125  | -1.792   | C15orf17             | 0.0109206  | 1.55927 | ATP2A3               | 7.53E-06   | 1.5929  |
| CORO1B             | 2.55E-06 | -1.79157 | PKD2                 | 0.00085235 | 1.55964 | GIYD2 /// SULT1A3 // | 1.77E-05   | 1.59314 |
| NAP1L1             | 0.00018  | -1.79128 | MTSS1                | 0.01414    | 1.55977 | BNIP1                | 0.00097841 | 1.59327 |
| ---                | 7.08E-06 | -1.79122 | LMBR1L               | 8.74E-06   | 1.56031 | TBC1D9               | 2.02E-07   | 1.59328 |
| PYGO2              | 0.0062   | -1.79111 | MAP7D1               | 0.00022961 | 1.5606  | DUSP2                | 2.23E-06   | 1.59333 |
| GATAD2B            | 2.04E-05 | -1.79067 | CTNNB1               | 0.00109792 | 1.56109 | BCAR1                | 1.50E-06   | 1.59374 |
| ---                | 0.00042  | -1.79012 | FOXD1                | 2.61E-06   | 1.56145 | orf78 /// LOC1001335 | 0.00129242 | 1.59416 |
| KIAA0141           | 1.96E-05 | -1.78987 | PPAP2A               | 0.00081267 | 1.56146 | FLJ43663             | 0.0480121  | 1.59427 |



|                   |          |          |                         |            |         |          |            |         |
|-------------------|----------|----------|-------------------------|------------|---------|----------|------------|---------|
| ---               | 2.36E-05 | -1.78986 | // RGPLD5 /// RGPLD6 // | 4.90E-06   | 1.56153 | MAP6D1   | 0.00204181 | 1.59487 |
| ARPP-19           | 6.02E-09 | -1.78881 | SLC8A1                  | 4.54E-05   | 1.56175 | IL15     | 0.0111411  | 1.59541 |
| CREBZF            | 4.40E-05 | -1.7884  | ---                     | 0.0239371  | 1.56186 | ISG15    | 1.72E-05   | 1.59545 |
| PCBD2             | 0.00121  | -1.78812 | ITCH                    | 0.00023236 | 1.56194 | C1orf86  | 0.00039815 | 1.59573 |
| ---               | 0.00096  | -1.78799 | LMO2                    | 0.00059586 | 1.56328 | SPATA13  | 3.61E-06   | 1.59588 |
| ---               | 0.00023  | -1.78789 | EFCAB2                  | 0.00065776 | 1.56346 | ITCH     | 9.01E-05   | 1.5959  |
| MAST2             | 1.97E-05 | -1.78749 | C8orf76                 | 0.00011287 | 1.56459 | ---      | 4.20E-05   | 1.59596 |
| PPIF              | 1.34E-08 | -1.78596 | MAPRE3                  | 0.00554799 | 1.56472 | ZFYVE19  | 1.86E-06   | 1.59605 |
| ZMYM4             | 6.21E-09 | -1.7853  | SCD                     | 9.47E-05   | 1.56576 | SLC26A11 | 1.61E-06   | 1.59743 |
| ALG2              | 9.95E-08 | -1.78413 | tcag7.1314              | 0.00435536 | 1.56607 | CDC37L1  | 0.00160064 | 1.59767 |
| ---               | 5.30E-06 | -1.78391 | LOC286440               | 0.0011629  | 1.56717 | C1orf124 | 0.0110108  | 1.59807 |
| FBXO4             | 2.72E-05 | -1.78358 | BCCIP                   | 0.00085925 | 1.56758 | ATP6V0E1 | 0.00102126 | 1.59818 |
| LRRFIP2           | 8.30E-06 | -1.78262 | NAPG                    | 3.18E-05   | 1.5681  | TNIK     | 0.00608407 | 1.59831 |
| TRIM4             | 1.96E-07 | -1.78213 | REC8                    | 0.00091728 | 1.5681  | ALS2CR2  | 6.90E-06   | 1.59838 |
| LOC90379          | 0.00044  | -1.78209 | CCR1                    | 3.73E-07   | 1.56814 | CNNM1    | 0.137079   | 1.59889 |
| CENPN             | 5.46E-09 | -1.78202 | PDCD4                   | 3.18E-07   | 1.56823 | MAPK9    | 0.00018209 | 1.59889 |
| ATP13A2           | 5.96E-07 | -1.78192 | LOC552889               | 0.00021936 | 1.56836 | ---      | 0.00432719 | 1.59963 |
| PPP1R7            | 0.0003   | -1.78175 | TMEM117                 | 5.21E-05   | 1.56838 | CPT1A    | 0.00678326 | 1.59966 |
| MPHOSPH9          | 1.10E-07 | -1.78173 | MTERFD2                 | 3.24E-05   | 1.56842 | CDC37L1  | 4.67E-06   | 1.59982 |
| HIP1              | 1.10E-05 | -1.78157 | ---                     | 0.00281541 | 1.56847 | ---      | 0.00292176 | 1.59985 |
| CENPF             | 7.97E-06 | -1.78112 | TMEM30A                 | 2.30E-07   | 1.5691  | NUCB2    | 0.00065189 | 1.5999  |
| ELOVL2            | 6.25E-05 | -1.7804  | CEBPA                   | 0.00070412 | 1.56956 | SMAD3    | 3.99E-05   | 1.60089 |
| MOCOS             | 5.58E-05 | -1.78027 | TRAFD1                  | 7.98E-06   | 1.56984 | C12orf23 | 2.56E-06   | 1.6012  |
| TPM1              | 1.63E-08 | -1.77997 | ---                     | 0.0004325  | 1.57    | TM9SF4   | 4.33E-05   | 1.60147 |
| GOLM1             | 0.00195  | -1.77995 | NXN                     | 0.00141397 | 1.57004 | SLC25A20 | 0.0179595  | 1.60171 |
| MTHFD1            | 0.00023  | -1.77987 | CA4                     | 3.66E-06   | 1.5703  | BCAP29   | 0.0001452  | 1.6019  |
| TIMP3             | 0.02093  | -1.77986 | TMEM1                   | 0.00166744 | 1.57035 | JMJD3    | 5.57E-06   | 1.60219 |
| ADH5              | 1.38E-08 | -1.7791  | ---                     | 0.010944   | 1.57064 | FAM108C1 | 7.00E-05   | 1.60228 |
| FLNB              | 1.73E-06 | -1.77898 | IMPAD1                  | 2.72E-05   | 1.57066 | ---      | 1.77E-05   | 1.60231 |
| PTP4A2            | 2.98E-06 | -1.77789 | RAPH1                   | 0.0001391  | 1.57114 | IER3IP1  | 0.00019087 | 1.60234 |
| CMBL              | 1.06E-07 | -1.7776  | SPSB2                   | 0.00181416 | 1.57144 | SYNGR3   | 0.00025793 | 1.60317 |
| ZNF432 /// ZNF614 | 2.09E-05 | -1.77733 | GADD45GIP1              | 3.87E-05   | 1.57145 | BHLHB9   | 0.0124091  | 1.6041  |
| PTER              | 0.00102  | -1.77695 | MGC4172                 | 0.0475666  | 1.57154 | NANOS1   | 2.45E-05   | 1.60535 |
| EML1              | 0.00053  | -1.77654 | SLC8A1                  | 0.00142486 | 1.57165 | RASSF5   | 0.0681909  | 1.60548 |
| MGC16169          | 5.00E-06 | -1.77654 | MOV10                   | 0.00157139 | 1.57259 | FAM130A1 | 1.10E-05   | 1.60629 |
| ATP6V1A           | 1.18E-07 | -1.77642 | TP53I3                  | 2.53E-05   | 1.57294 | ---      | 0.0127289  | 1.60658 |
| NMB               | 8.52E-08 | -1.77586 | TRIB1                   | 1.21E-06   | 1.57382 | LMBRD1   | 1.52E-08   | 1.60659 |
| PREX1             | 7.12E-08 | -1.77584 | ASF1A                   | 2.03E-08   | 1.5741  | NMI      | 2.97E-06   | 1.60718 |
| USP1              | 9.64E-06 | -1.77558 | FGFR1OP2                | 0.00068516 | 1.57426 | STAU2    | 2.55E-05   | 1.60723 |
| SEMA4D            | 0.00012  | -1.77545 | MFAP3                   | 5.16E-05   | 1.57452 | PARP10   | 0.00737249 | 1.60736 |
| EPHA6             | 0.00087  | -1.77541 | SEC22C                  | 0.0102384  | 1.57515 | CA4      | 2.47E-06   | 1.60866 |
| EME1              | 9.75E-07 | -1.77505 | ---                     | 0.00859397 | 1.57537 | MTERFD2  | 2.17E-05   | 1.60907 |
| TPM1              | 3.12E-08 | -1.77477 | HSPA1A /// HSPA1B       | 3.43E-09   | 1.57574 | TRIM14   | 1.41E-05   | 1.60922 |
| GLCE              | 0.0003   | -1.77447 | BCAP29                  | 0.00018541 | 1.5758  | IL1RAP   | 0.0549805  | 1.60951 |
| AIG1              | 3.88E-06 | -1.77386 | UBE2F                   | 0.0024286  | 1.57673 | ---      | 0.00228956 | 1.60978 |
| FA2H              | 1.62E-05 | -1.77383 | KIF5C                   | 0.00014348 | 1.57678 | C17orf28 | 0.00235041 | 1.61126 |
| ASCL1             | 3.20E-06 | -1.77362 | LARP4                   | 0.0438683  | 1.57718 | ACOX1    | 0.00058296 | 1.61216 |
| BCAP29            | 3.96E-05 | -1.77303 | NUP35                   | 1.20E-07   | 1.57738 | PPP1R3B  | 0.00025525 | 1.61223 |
| LRRC16A           | 0.00087  | -1.77292 | GBAS                    | 1.58E-07   | 1.57764 | ZNF557   | 0.00725578 | 1.61226 |

|                   |          |          |                     |            |         |                     |            |         |
|-------------------|----------|----------|---------------------|------------|---------|---------------------|------------|---------|
| ZDHHC21           | 0.00277  | -1.77292 | LSM10               | 2.30E-06   | 1.57898 | ---                 | 4.37E-05   | 1.61256 |
| VISA              | 1.26E-06 | -1.77285 | ---                 | 0.00125497 | 1.57921 | ABCC4               | 0.0189467  | 1.61276 |
| ASH2L             | 5.37E-08 | -1.77277 | ---                 | 0.00015773 | 1.57949 | MFAP3               | 3.52E-05   | 1.61397 |
| HADH              | 3.17E-07 | -1.77269 | AGA                 | 7.41E-06   | 1.57962 | FLJ13611            | 0.00047938 | 1.61538 |
| TRAPPC3           | 5.25E-06 | -1.77263 | KIAA1618            | 0.00920327 | 1.57965 | SENP2               | 1.02E-06   | 1.61558 |
| MTMR12            | 1.33E-06 | -1.77258 | NMT1                | 1.08E-07   | 1.57968 | DDIT4L              | 0.0207846  | 1.61652 |
| KLF12             | 0.00387  | -1.77243 | ENC1                | 0.00017777 | 1.57985 | DRD1                | 0.0119552  | 1.61673 |
| SMARCA1           | 0.00035  | -1.77225 | TOR1A               | 3.00E-06   | 1.57985 | RPS27L              | 1.27E-06   | 1.61683 |
| RPS6KA3           | 0.00047  | -1.77145 | CYFIP2              | 2.52E-06   | 1.58045 | OGFRL1              | 2.80E-05   | 1.61686 |
| HDAC4             | 0.00222  | -1.77134 | PDXK                | 2.31E-06   | 1.58165 | HRASLS3             | 9.13E-06   | 1.61717 |
| FLJ44342          | 7.80E-05 | -1.77124 | GTPBP5              | 0.00029272 | 1.58176 | GSTM3               | 0.00547423 | 1.61752 |
| CNPY4             | 3.17E-06 | -1.77109 | TMEM188             | 0.00165421 | 1.58191 | CDYL2               | 0.018205   | 1.61853 |
| KIAA0152          | 1.88E-08 | -1.77091 | CFB                 | 5.53E-06   | 1.58382 | SULT1A2             | 2.97E-06   | 1.6196  |
| PEX19             | 0.00183  | -1.77042 | RPAP3               | 4.80E-05   | 1.58411 | PAPD5               | 0.0003353  | 1.62001 |
| SDHALP1           | 8.45E-05 | -1.7703  | ONECUT2             | 0.0061875  | 1.58489 | ABHD5               | 0.0021801  | 1.62056 |
| COL4A6            | 0.02028  | -1.7699  | ARMCX5              | 1.25E-07   | 1.58508 | FBXO44              | 0.00889981 | 1.62057 |
| FIG4              | 4.80E-06 | -1.76882 | ING3                | 0.00661486 | 1.58515 | Gcom1 /// GRINL1A   | 1.38E-05   | 1.62091 |
| SCD5              | 3.11E-06 | -1.76857 | RTKN                | 0.00141687 | 1.58537 | CCDC126             | 0.00014961 | 1.62178 |
| KIF26A            | 7.04E-05 | -1.7685  | ZBTB10              | 0.00013005 | 1.58552 | SOX2                | 6.80E-05   | 1.62209 |
| LOC645323         | 0.00043  | -1.76806 | DC100128443 /// MAS | 0.00042584 | 1.58554 | P2RX2               | 0.0127232  | 1.62209 |
| C15orf23          | 3.01E-07 | -1.7679  | SGPP2               | 0.00034364 | 1.58602 | SNX6                | 2.16E-05   | 1.62229 |
| ---               | 0.00038  | -1.76782 | HPSE                | 0.0232185  | 1.58609 | TncRNA              | 5.23E-05   | 1.62334 |
| ZNF519            | 1.60E-05 | -1.76685 | C7orf42             | 3.27E-05   | 1.58629 | TRPC1               | 0.00029615 | 1.62399 |
| PALM              | 1.26E-05 | -1.7666  | PSD3                | 0.00697902 | 1.58724 | HSD17B14            | 0.00194999 | 1.62456 |
| ZNF311            | 0.00105  | -1.7665  | MANSC1              | 4.32E-05   | 1.58793 | CXorf39             | 1.26E-06   | 1.62492 |
| BSCL2 /// HNRNPUL | 1.26E-09 | -1.76625 | DOCK9               | 0.00098987 | 1.5881  | GBAS                | 9.69E-08   | 1.62496 |
| TMEM68            | 0.00015  | -1.76554 | ---                 | 0.0184541  | 1.58918 | SCCPDH              | 3.34E-08   | 1.62544 |
| ---               | 0.00025  | -1.76501 | BRPF3               | 0.0002365  | 1.58979 | KIAA1984            | 0.0004682  | 1.62597 |
| FKBP5             | 1.00E-06 | -1.76451 | ECH1                | 1.71E-05   | 1.58984 | PRR17               | 0.00120727 | 1.62683 |
| ---               | 4.82E-05 | -1.76442 | ICAM1               | 7.74E-05   | 1.59019 | KLF6                | 0.00074916 | 1.62685 |
| CTNNBIP1          | 4.65E-06 | -1.76412 | FAAH2               | 0.0018348  | 1.59023 | ZNFX1               | 3.64E-07   | 1.627   |
| ---               | 0.00493  | -1.76367 | IFI30 /// PIK3R2    | 9.98E-07   | 1.59052 | KCTD21              | 3.58E-05   | 1.627   |
| ---               | 0.00014  | -1.76337 | MTERFD2             | 0.00093949 | 1.59052 | ---                 | 0.0049977  | 1.62702 |
| GALNT10           | 0.00101  | -1.76331 | TRAM1L1             | 0.0492597  | 1.59075 | FLJ22167            | 0.00218403 | 1.62712 |
| WDR52             | 0.00116  | -1.76329 | ---                 | 0.01334    | 1.59076 | UBR1                | 0.00323159 | 1.62717 |
| MGLL              | 1.29E-05 | -1.76303 | HLA-G               | 3.23E-06   | 1.59105 | PDZRN3              | 0.0220253  | 1.62745 |
| ---               | 0.00311  | -1.76292 | SAMD8               | 0.00670676 | 1.59212 | ST8SIA4             | 9.42E-05   | 1.62761 |
| NFATC2IP          | 3.92E-05 | -1.76277 | RHOA                | 0.00032719 | 1.5923  | MFSD8               | 2.86E-06   | 1.62838 |
| PPP1R9A           | 5.46E-05 | -1.76241 | SEC23B              | 7.91E-05   | 1.59241 | SAT1                | 3.18E-05   | 1.6289  |
| KCNN4             | 0.0027   | -1.76193 | FST                 | 1.96E-05   | 1.59247 | M189-UBE2V1 /// UBE | 2.98E-06   | 1.62901 |
| SLC25A40          | 1.57E-06 | -1.7617  | N4BP2L2             | 0.0144354  | 1.59274 | STCH                | 2.42E-05   | 1.62925 |
| ITFG1             | 1.12E-06 | -1.76168 | NOL3                | 4.39E-06   | 1.59343 | LHX2                | 0.00363115 | 1.63058 |
| LOC100130415      | 0.01241  | -1.76022 | DDHD1               | 3.41E-06   | 1.59369 | BSCL2 /// HNRNPUL   | 4.16E-09   | 1.63095 |
| TMEM64            | 1.56E-05 | -1.76003 | SCD                 | 4.45E-05   | 1.59377 | FLJ39051            | 0.00032667 | 1.63218 |
| NRARP             | 2.98E-05 | -1.75993 | C5orf41             | 0.00033283 | 1.59427 | KIAA1377            | 0.014651   | 1.63279 |
| LOC100129022      | 0.00026  | -1.75964 | GFM1                | 0.00010196 | 1.59433 | PJA1                | 4.99E-06   | 1.6332  |
| GOLGA7            | 3.75E-06 | -1.75859 | APOO                | 6.54E-06   | 1.59488 | GLTSCR1             | 0.00022275 | 1.63349 |
| ---               | 3.98E-05 | -1.75852 | SNF1LK              | 6.77E-05   | 1.59515 | NDUFA6              | 1.10E-07   | 1.63436 |
| SULF2             | 5.67E-08 | -1.75836 | FLJ38379            | 0.0536394  | 1.59517 | C7orf42             | 2.06E-05   | 1.63473 |

|           |          |          |                |            |         |                     |            |         |
|-----------|----------|----------|----------------|------------|---------|---------------------|------------|---------|
| EVL       | 4.33E-08 | -1.75824 | CPD            | 0.0141715  | 1.59536 | RRAS2               | 4.53E-07   | 1.63481 |
| TTF2      | 8.07E-05 | -1.75805 | MRC2           | 0.00475913 | 1.5963  | NSF                 | 2.94E-06   | 1.63486 |
| ---       | 6.63E-06 | -1.75748 | TMEM39A        | 1.32E-06   | 1.59639 | C19orf42            | 0.00131994 | 1.63512 |
| C11orf60  | 4.40E-07 | -1.75736 | ALG2           | 5.19E-07   | 1.59708 | PINK1               | 8.92E-05   | 1.63513 |
| ZNF580    | 2.03E-06 | -1.75701 | MYCBP2         | 0.00012838 | 1.59767 | PCTK2               | 0.00061126 | 1.63521 |
| ---       | 0.00023  | -1.75592 | CHPF           | 0.00020991 | 1.59767 | MAP3K8              | 0.00235125 | 1.63549 |
| NUP210    | 1.57E-06 | -1.75564 | CALU           | 1.58E-05   | 1.59774 | ARPC1B              | 2.65E-07   | 1.63577 |
| ATP6V1A   | 1.76E-05 | -1.75542 | BNIP1          | 2.03E-05   | 1.598   | CFL2                | 0.00457839 | 1.63644 |
| CC2D1A    | 0.06805  | -1.75504 | MED31          | 4.19E-06   | 1.59839 | ---                 | 0.0103493  | 1.63645 |
| RASA2     | 0.00405  | -1.755   | FLJ22167       | 0.00098454 | 1.59867 | ASTN2               | 3.00E-05   | 1.63666 |
| FLJ45244  | 0.00016  | -1.75412 | FAM130A1       | 1.19E-05   | 1.59876 | ALKBH7              | 1.52E-05   | 1.63694 |
| ID4       | 0.00242  | -1.75384 | REL            | 6.34E-05   | 1.59891 | FAM13A1             | 0.0720778  | 1.63724 |
| ---       | 0.00182  | -1.75363 | RILPL2         | 3.39E-05   | 1.59949 | SUMO1               | 0.0242664  | 1.63725 |
| TBC1D5    | 0.00026  | -1.75359 | ATP11B         | 0.00472416 | 1.60055 | ME1                 | 2.81E-07   | 1.63731 |
| UPK2      | 0.01387  | -1.75358 | B2M            | 5.67E-09   | 1.60121 | CD59                | 0.00020804 | 1.63751 |
| HES6      | 2.88E-05 | -1.75326 | ZFAND2A        | 9.69E-06   | 1.60203 | MOBK1A              | 0.00180189 | 1.63753 |
| GALNT6    | 1.24E-07 | -1.75289 | CDC37L1        | 4.56E-06   | 1.60223 | KLF5                | 1.65E-05   | 1.63908 |
| C6orf89   | 1.50E-05 | -1.75277 | TWSG1          | 0.0102619  | 1.60228 | KIAA0256            | 0.00537164 | 1.63925 |
| ---       | 0.00146  | -1.75274 | MAN1A1         | 3.80E-05   | 1.60282 | CHPF                | 0.00014515 | 1.6395  |
| DMPK      | 6.40E-09 | -1.75268 | QDPR           | 7.73E-06   | 1.603   | GFM1                | 6.75E-05   | 1.63968 |
| ---       | 0.00012  | -1.75232 | NAMPT          | 1.40E-05   | 1.60301 | FLJ11151            | 6.43E-07   | 1.63989 |
| ---       | 1.20E-05 | -1.75207 | TMEM67         | 0.00128687 | 1.60301 | SMARCD3             | 0.00159195 | 1.64011 |
| ANXA2     | 2.93E-08 | -1.75163 | C10orf47       | 8.80E-05   | 1.60316 | DYNLRB2             | 0.0169849  | 1.64054 |
| SH3GLB1   | 1.10E-05 | -1.75146 | IKIP           | 0.00105919 | 1.60334 | ABCC4               | 0.00011472 | 1.64068 |
| WASF2     | 2.86E-06 | -1.7513  | UNC93B1        | 2.27E-05   | 1.60337 | PDCD4               | 1.50E-07   | 1.64156 |
| HERC2     | 9.76E-07 | -1.75058 | NAMPT          | 0.00014442 | 1.60399 | ST8SIA4             | 0.00025144 | 1.64212 |
| CCDC138   | 0.00329  | -1.75027 | PNKD           | 2.69E-06   | 1.60419 | /// TRIM6 /// TRIM6 | 0.0663142  | 1.64238 |
| BLCAP     | 4.27E-08 | -1.74993 | CALU           | 2.83E-05   | 1.60426 | SRCAP               | 0.000132   | 1.6435  |
| GNPTAB    | 3.67E-06 | -1.74991 | MTERFD2        | 4.03E-06   | 1.60478 | DKFZP434B0335       | 6.90E-05   | 1.64365 |
| LOC388969 | 9.80E-06 | -1.74976 | CENTA1         | 2.31E-06   | 1.6051  | ---                 | 1.45E-06   | 1.64433 |
| ZNF268    | 5.92E-06 | -1.74951 | ELOVL6         | 9.57E-05   | 1.60553 | SPEG                | 0.0649315  | 1.64444 |
| ALS2CR4   | 6.88E-06 | -1.74904 | BACE2          | 5.02E-05   | 1.60696 | ---                 | 0.00012069 | 1.64466 |
| ---       | 1.57E-05 | -1.74886 | FRMD6          | 1.66E-06   | 1.6075  | C20orf134           | 8.58E-05   | 1.64552 |
| GARNL1    | 6.71E-05 | -1.74872 | PCYT2          | 0.00010369 | 1.60786 | RHOBTB1             | 9.30E-05   | 1.64585 |
| PYCARD    | 0.0001   | -1.74872 | LOX            | 0.0184805  | 1.60787 | BCKDHB              | 0.00020467 | 1.64642 |
| MGC57346  | 0.00096  | -1.74754 | ST8SIA4        | 7.52E-05   | 1.60826 | XK                  | 0.0208138  | 1.64659 |
| ZNF828    | 0.00024  | -1.747   | ME2            | 0.00046446 | 1.6083  | MGAT4A              | 0.00047573 | 1.64705 |
| ARSD      | 6.47E-07 | -1.7461  | ---            | 3.95E-05   | 1.60842 | TCEA3               | 0.00115548 | 1.64734 |
| ---       | 2.87E-05 | -1.74606 | CAMK2N1        | 2.99E-05   | 1.60962 | NME3                | 3.04E-06   | 1.64783 |
| FOXRED2   | 5.98E-05 | -1.74516 | ---            | 0.0055986  | 1.60987 | IFITM1              | 3.64E-08   | 1.64794 |
| LPP       | 1.07E-06 | -1.74503 | TRAFD1         | 0.00128531 | 1.61073 | SENP5               | 8.45E-05   | 1.64804 |
| METTL9    | 2.33E-07 | -1.74501 | INHA           | 2.42E-06   | 1.61141 | ABHD7               | 0.00480663 | 1.64877 |
| MAP3K1    | 0.01624  | -1.74476 | MTHFS /// ST20 | 5.97E-07   | 1.61143 | MANSC1              | 2.43E-05   | 1.64935 |
| LASS2     | 2.11E-10 | -1.74456 | LIPA           | 1.30E-08   | 1.61153 | TTC7B               | 0.00019375 | 1.65033 |
| ANXA4     | 9.78E-07 | -1.74398 | ZNF770         | 1.09E-05   | 1.61184 | C22orf9             | 0.00030847 | 1.65061 |
| CENTB2    | 4.80E-05 | -1.74397 | SLC5A3         | 3.21E-05   | 1.61195 | SLC12A5             | 0.00010206 | 1.65062 |
| ---       | 6.56E-07 | -1.74378 | MTRF1          | 0.00170925 | 1.61205 | MMP15               | 0.00668738 | 1.65091 |
| CXXC5     | 8.66E-08 | -1.74356 | C5orf41        | 0.00116414 | 1.61315 | FDXR                | 0.00037503 | 1.65091 |
| GOLPH3L   | 1.57E-06 | -1.74344 | FAM62B         | 0.016357   | 1.61398 | ZER1                | 0.00041578 | 1.65195 |

|            |          |          |                    |            |         |                |            |         |
|------------|----------|----------|--------------------|------------|---------|----------------|------------|---------|
| MTMR11     | 3.78E-05 | -1.74332 | BCAP29             | 0.00014051 | 1.61425 | ACOX3          | 0.00038321 | 1.65212 |
| C1orf77    | 4.81E-05 | -1.74326 | FAM110A            | 0.00076702 | 1.61436 | AIFM2          | 0.00234192 | 1.65242 |
| COCH       | 0.0024   | -1.74279 | KIF3A              | 0.0006034  | 1.61465 | NAT1           | 1.02E-05   | 1.65258 |
| RPL35A     | 0.00071  | -1.74237 | KIAA0241           | 0.00010894 | 1.61503 | IRF2BP2        | 4.19E-05   | 1.65267 |
| C19orf51   | 0.00537  | -1.74232 | SEC61A2            | 4.48E-05   | 1.6157  | ---            | 0.00417939 | 1.65273 |
| CCDC21     | 8.58E-05 | -1.74231 | C12orf26           | 1.62E-05   | 1.61659 | KIAA0500       | 0.00012833 | 1.65276 |
| ---        | 7.47E-07 | -1.7422  | LOC255783          | 4.96E-06   | 1.61672 | C2orf15        | 0.00173889 | 1.65388 |
| DNAL1      | 0.00109  | -1.74203 | ING1               | 7.88E-06   | 1.61718 | PPFIA2         | 3.27E-07   | 1.65409 |
| HMGB2      | 2.62E-07 | -1.7417  | FGF12              | 0.00081785 | 1.61748 | FAM131A        | 6.89E-05   | 1.65472 |
| ---        | 4.90E-06 | -1.7414  | ZNF313             | 7.66E-07   | 1.61806 | GFM1           | 2.04E-07   | 1.65486 |
| ---        | 0.00015  | -1.74106 | SOS1               | 7.10E-06   | 1.61858 | EDN1           | 7.95E-06   | 1.65525 |
| RAB11FIP3  | 3.37E-07 | -1.74106 | LRP12              | 0.00719264 | 1.6186  | LOC100128501   | 0.00015185 | 1.65562 |
| ZNF785     | 0.00988  | -1.74075 | C14orf83           | 0.00036134 | 1.61877 | NR1H3          | 0.00097639 | 1.65563 |
| RNUXA      | 0.00027  | -1.74048 | RHOV               | 5.99E-05   | 1.61878 | PSME4          | 4.53E-05   | 1.65563 |
| OXCT1      | 5.27E-05 | -1.74022 | ME1                | 3.36E-07   | 1.61909 | ---            | 0.00136255 | 1.65564 |
| ---        | 0.0008   | -1.73907 | CLMN               | 0.0001961  | 1.62073 | SAMHD1         | 4.69E-05   | 1.65599 |
| XPO6       | 2.50E-06 | -1.73826 | ELOVL6             | 6.98E-06   | 1.62305 | ALKBH7         | 0.00020536 | 1.65664 |
| ---        | 2.35E-06 | -1.73785 | EXT2               | 6.31E-05   | 1.62309 | BTBD14A        | 0.0109929  | 1.65697 |
| SNRPA      | 1.52E-08 | -1.73724 | CORO7 /// Magmas   | 0.00016237 | 1.62312 | PTCH1          | 0.00209366 | 1.6587  |
| ---        | 4.20E-06 | -1.73717 | FBXO3              | 0.00225107 | 1.62407 | S1PR3          | 1.42E-06   | 1.65911 |
| PCNA       | 2.77E-06 | -1.73708 | SNX25              | 0.00034369 | 1.62444 | ANKRD6         | 0.0003573  | 1.65953 |
| MAN2A1     | 8.65E-05 | -1.73689 | TPST2              | 0.00201752 | 1.62506 | LIN7B          | 9.41E-06   | 1.65974 |
| ZNF785     | 0.00055  | -1.73684 | ORAI2              | 0.00448481 | 1.62529 | CENTA1         | 1.37E-06   | 1.6599  |
| KCTD13     | 1.66E-05 | -1.7367  | CCR1               | 0.026492   | 1.62543 | RNF213         | 1.11E-07   | 1.66013 |
| FNTB       | 0.00298  | -1.73657 | ---                | 0.00357358 | 1.62604 | ARMCX5         | 5.91E-08   | 1.66046 |
| LOC144871  | 9.09E-06 | -1.73626 | MED8               | 0.00035618 | 1.62746 | LOC100130536   | 0.00345404 | 1.66064 |
| CASP2      | 0.0049   | -1.73621 | BSCL2 /// HNRNPUL2 | 4.29E-09   | 1.62801 | NOTCH1         | 0.00011437 | 1.66081 |
| CDCA4      | 1.92E-08 | -1.73602 | JAG1               | 0.00010587 | 1.62832 | LOC692247      | 8.46E-07   | 1.66131 |
| PLA2G10    | 0.02186  | -1.73537 | CHD1               | 3.52E-06   | 1.62846 | ---            | 0.00370409 | 1.66234 |
| ---        | 5.26E-06 | -1.73456 | ENC1               | 0.0153306  | 1.6288  | UBLCP1         | 0.0010486  | 1.66265 |
| tcag7.1228 | 0.00035  | -1.73453 | CLEC2D             | 0.0452537  | 1.62946 | ARPC4 /// TTL3 | 0.00021945 | 1.66282 |
| TCHH       | 0.00245  | -1.73433 | C1orf108           | 9.50E-07   | 1.62981 | FBXO3          | 0.00427054 | 1.66347 |
| ---        | 0.01079  | -1.73389 | ETNK1              | 0.00111773 | 1.6321  | SMAD1          | 0.00098369 | 1.66419 |
| ---        | 5.12E-05 | -1.73386 | SEN2               | 8.62E-07   | 1.6323  | CRTAP          | 0.00719338 | 1.66456 |
| ARFIP1     | 2.62E-06 | -1.73265 | ENTPD4             | 7.76E-06   | 1.63261 | SLC30A9        | 4.02E-06   | 1.6649  |
| RAB40C     | 1.64E-05 | -1.73175 | MAPK9              | 0.00013336 | 1.6339  | ---            | 0.00982246 | 1.66509 |
| NUCKS1     | 1.91E-08 | -1.73163 | DNAJA1             | 1.62E-08   | 1.63426 | RANBP2         | 1.13E-05   | 1.66534 |
| GTF3C1     | 1.11E-06 | -1.73157 | SERPINH1           | 1.66E-06   | 1.63443 | PPP1R3C        | 3.45E-05   | 1.66534 |
| NNT        | 1.26E-06 | -1.73104 | FUCA1              | 9.96E-07   | 1.6363  | SALL2          | 0.00153531 | 1.6657  |
| NY-SAR-48  | 0.00034  | -1.73033 | FKBP11             | 3.87E-07   | 1.63642 | SLC23A2        | 0.0519465  | 1.66847 |
| ---        | 0.00024  | -1.73019 | S1PR3              | 1.75E-06   | 1.63691 | BMP7           | 1.08E-06   | 1.66848 |
| ---        | 0.00067  | -1.7298  | SNX21              | 0.014619   | 1.63736 | CIDEC          | 9.13E-06   | 1.66883 |
| ZFYVE16    | 1.53E-06 | -1.72944 | SELK               | 5.81E-07   | 1.63737 | HRBL           | 1.31E-05   | 1.66955 |
| HELLS      | 1.64E-05 | -1.72918 | KIAA1432           | 0.00053218 | 1.63871 | NQO1           | 5.16E-09   | 1.67006 |
| ADAM15     | 0.00078  | -1.72908 | SLC35C1            | 0.0029545  | 1.63894 | ---            | 3.25E-06   | 1.67128 |
| NEK2       | 0.00024  | -1.72896 | TCEA3              | 0.00123076 | 1.63902 | SLCO4C1        | 0.0127718  | 1.67131 |
| ARL3       | 4.51E-09 | -1.72883 | M189-UBE2V1 /// UB | 3.19E-07   | 1.63906 | TMED7          | 0.00700659 | 1.67136 |
| ---        | 6.45E-08 | -1.72823 | TXNDC15            | 2.17E-07   | 1.63932 | EHBP1L1        | 0.0745081  | 1.67256 |
| CA8        | 1.68E-05 | -1.7282  | ZDHC13             | 0.0001783  | 1.63961 | SEC24A         | 1.76E-05   | 1.67347 |

|                     |          |          |                |            |         |                    |            |         |
|---------------------|----------|----------|----------------|------------|---------|--------------------|------------|---------|
| PLXNA1              | 2.61E-06 | -1.728   | MRPS12         | 0.0001204  | 1.64012 | ATP2A3             | 8.53E-06   | 1.67365 |
| SPDEF               | 1.89E-06 | -1.72792 | ---            | 0.00454884 | 1.64014 | ZMAT3              | 0.00337607 | 1.67507 |
| ---                 | 0.00687  | -1.72785 | CBR3           | 2.06E-05   | 1.64028 | HERPUD1            | 3.59E-07   | 1.67525 |
| TTC17               | 9.41E-06 | -1.72782 | LACTB          | 0.00028746 | 1.64087 | FGFR1OP2           | 1.55E-05   | 1.6753  |
| C6orf64             | 0.00797  | -1.7266  | ARMC8          | 0.00015639 | 1.64101 | PKIA               | 4.36E-07   | 1.67624 |
| SLC39A8             | 4.86E-07 | -1.72638 | B9D1           | 0.00549415 | 1.64318 | USP53              | 0.00020639 | 1.67668 |
| EML4                | 2.20E-07 | -1.72632 | N6AMT1         | 0.00883996 | 1.64318 | NAAA               | 3.17E-06   | 1.67797 |
| GLT8D3              | 0.00042  | -1.72615 | CENTA1         | 2.99E-05   | 1.64394 | DNAJB9             | 1.50E-06   | 1.67824 |
| SYT17               | 0.00103  | -1.72548 | GFM1           | 2.26E-07   | 1.644   | RAPH1              | 5.31E-05   | 1.67854 |
| ---                 | 1.55E-06 | -1.72511 | RPAP3          | 8.43E-06   | 1.64476 | LARP6              | 3.85E-05   | 1.6793  |
| GP1BB /// SEPT5     | 0.00051  | -1.72479 | C5orf41        | 0.0159707  | 1.64511 | PDIA5              | 2.80E-07   | 1.67932 |
| RNPA3 /// HNRNPA    | 0.00015  | -1.72454 | KIAA1539       | 1.73E-05   | 1.64551 | IGFBP2             | 9.81E-10   | 1.67962 |
| ALG10B              | 7.18E-05 | -1.72432 | FAM92A1        | 1.81E-05   | 1.64563 | TMEM55A            | 0.00153229 | 1.67968 |
| ---                 | 1.08E-05 | -1.72388 | ---            | 0.00998436 | 1.64582 | SLC4A11            | 0.00046941 | 1.68186 |
| RECQL               | 4.62E-07 | -1.72379 | CPOX           | 2.51E-05   | 1.64703 | PPP3CC             | 0.0204948  | 1.68217 |
| ITPR3               | 0.0006   | -1.72339 | DKFZP434B0335  | 6.68E-05   | 1.64735 | SLC45A4            | 0.00333312 | 1.68237 |
| HP1BP3              | 0.00152  | -1.72334 | PPP3CC         | 0.0244897  | 1.64741 | ENDOD1             | 0.0002031  | 1.68245 |
| ---                 | 0.00052  | -1.72295 | YIPF6          | 2.55E-05   | 1.64769 | LBA1               | 5.44E-06   | 1.68426 |
| TMEM30B             | 1.32E-07 | -1.72271 | FAM118A        | 0.00785525 | 1.64786 | BAG4               | 3.16E-10   | 1.68438 |
| PGBD2               | 7.42E-06 | -1.72261 | MFSD8          | 2.38E-06   | 1.648   | RIT1               | 2.91E-09   | 1.68492 |
| FOSL2               | 2.35E-06 | -1.7223  | ARPC4 /// TTL3 | 0.00024638 | 1.64859 | LOC388135          | 0.00029614 | 1.68494 |
| HINT1               | 4.86E-06 | -1.72148 | ZNF579         | 0.00174501 | 1.64896 | YIPF6              | 1.85E-05   | 1.68504 |
| LOC728198 /// TAF9E | 1.21E-06 | -1.72143 | GFM1           | 2.01E-08   | 1.6495  | ---                | 0.00069296 | 1.6855  |
| ---                 | 0.00069  | -1.72091 | TRAK1          | 0.0191422  | 1.6495  | SLC35A1            | 6.93E-08   | 1.68564 |
| LRP8                | 2.07E-05 | -1.72064 | C20orf134      | 8.26E-05   | 1.64987 | TSPAN1             | 0.00026768 | 1.68584 |
| ESR1                | 0.00334  | -1.72047 | PGM3           | 3.25E-05   | 1.65157 | CLU                | 0.00011453 | 1.6859  |
| HNRNPH1             | 8.82E-05 | -1.72045 | BTG3           | 3.34E-06   | 1.65163 | BIK                | 3.00E-05   | 1.68636 |
| UNG                 | 8.47E-07 | -1.72019 | ---            | 2.23E-05   | 1.65181 | PDCD4              | 1.04E-06   | 1.68642 |
| FUS                 | 8.38E-06 | -1.71919 | HDHD3          | 7.72E-06   | 1.65229 | SCML1              | 5.53E-05   | 1.68664 |
| SSFA2               | 0.00034  | -1.71869 | WIP1           | 7.46E-05   | 1.65282 | KIF3A              | 0.00033928 | 1.68706 |
| FAM115A             | 3.39E-06 | -1.71854 | ZNHIT3         | 9.60E-07   | 1.65299 | PSD3               | 5.01E-06   | 1.68709 |
| RBM47               | 9.04E-07 | -1.71851 | FLJ40142       | 0.00024487 | 1.65305 | GPRC5C             | 8.55E-07   | 1.6883  |
| DNAJC9              | 3.92E-08 | -1.71828 | ARFGAP3        | 2.14E-05   | 1.65318 | EXOC6              | 0.00011432 | 1.68854 |
| CRADD               | 1.89E-07 | -1.71816 | FLJ13611       | 0.00035007 | 1.65357 | NFYA               | 0.00039263 | 1.68953 |
| ZNF226              | 1.10E-05 | -1.71748 | CCDC68         | 0.00401446 | 1.65382 | ---                | 0.00015631 | 1.68957 |
| FLJ38973            | 3.48E-06 | -1.71733 | SHROOM3        | 2.72E-05   | 1.65487 | ZNF579             | 0.00130036 | 1.69031 |
| LARP7               | 0.00317  | -1.7173  | CALU           | 5.43E-07   | 1.65501 | ING1               | 8.40E-06   | 1.69034 |
| ---                 | 0.00277  | -1.71675 | KIF13B         | 0.00250358 | 1.65589 | F7                 | 2.18E-05   | 1.6905  |
| ZBTB7A              | 3.48E-06 | -1.71672 | GCNT1          | 9.59E-05   | 1.65615 | NXN                | 0.00054121 | 1.69073 |
| SMARCD2             | 3.82E-06 | -1.71669 | ID3            | 6.60E-08   | 1.65661 | MUC5B              | 0.00378289 | 1.69247 |
| CRYZL1              | 3.46E-05 | -1.71604 | SEC24A         | 2.02E-05   | 1.65718 | C21orf57           | 2.88E-06   | 1.69315 |
| H1FX                | 0.0002   | -1.7158  | C1orf78        | 0.00014159 | 1.6573  | BMP7               | 1.39E-06   | 1.6932  |
| BICD2               | 0.00017  | -1.71565 | ---            | 1.06E-05   | 1.65731 | LPPR2              | 6.60E-06   | 1.6934  |
| JARID2              | 6.84E-07 | -1.7151  | NARF           | 2.36E-06   | 1.65732 | MYCBP2             | 1.65E-06   | 1.69341 |
| TSPAN4              | 0.00013  | -1.71493 | PRKD2          | 5.22E-06   | 1.65771 | CCNDBP1            | 1.28E-07   | 1.69389 |
| ---                 | 0.0009   | -1.71465 | STRN3          | 0.0516877  | 1.65785 | M189-UBE2V1 /// UE | 1.92E-07   | 1.69459 |
| NUDT21              | 1.62E-07 | -1.71456 | SEC24A         | 4.29E-05   | 1.65842 | TRABD              | 0.00121263 | 1.69462 |
| VASP                | 7.26E-06 | -1.71447 | YRDC           | 3.15E-05   | 1.65947 | MEIS2              | 0.00010158 | 1.69475 |
| KLC3                | 0.00557  | -1.71439 | B3GAT3         | 0.00269488 | 1.65958 | INTS6              | 0.00012089 | 1.6951  |

|                     |          |          |                   |            |         |                       |            |         |
|---------------------|----------|----------|-------------------|------------|---------|-----------------------|------------|---------|
| PTPLB               | 6.55E-07 | -1.71428 | ARPC1B            | 2.10E-07   | 1.6601  | SAMHD1                | 0.00284657 | 1.69553 |
| ---                 | 0.01424  | -1.71418 | CNNM4             | 4.34E-06   | 1.66028 | CCDC57                | 3.47E-05   | 1.69579 |
| PRMT2               | 1.85E-05 | -1.71294 | MYD88             | 3.26E-10   | 1.66046 | HEY1                  | 0.00016501 | 1.69604 |
| MAP3K1              | 1.14E-07 | -1.71257 | HS6ST3            | 0.00020671 | 1.66087 | FAM110A               | 0.00040273 | 1.697   |
| OPRS1               | 0.00153  | -1.71248 | OGFR              | 5.68E-05   | 1.6617  | S100A6                | 6.91E-06   | 1.69811 |
| LRP10               | 0.0033   | -1.71244 | C19orf42          | 0.00108057 | 1.66175 | SP100                 | 2.30E-05   | 1.69828 |
| C9orf46             | 1.12E-05 | -1.71182 | HLA-C             | 1.37E-09   | 1.6624  | PSAT1                 | 0.00087035 | 1.69887 |
| ELMOD2              | 1.89E-06 | -1.71099 | LTB4DH            | 0.00017013 | 1.66381 | SLC5A3                | 5.35E-08   | 1.69915 |
| PAQR8               | 0.01438  | -1.71098 | OGFRL1            | 1.83E-05   | 1.66386 | AGA                   | 7.50E-06   | 1.70006 |
| R3HDM1              | 3.33E-07 | -1.71074 | DMD               | 0.00020584 | 1.66408 | BRMS1L                | 0.00265311 | 1.70013 |
| SPDEF               | 4.20E-06 | -1.71073 | HUS1              | 1.69E-05   | 1.66453 | NVL                   | 6.05E-06   | 1.70053 |
| POM121 /// POM121C  | 2.92E-07 | -1.71064 | UBLCP1            | 0.00103011 | 1.66506 | ZNF467                | 2.48E-07   | 1.70146 |
| PQLC3               | 6.91E-08 | -1.70906 | IDS               | 0.00809808 | 1.66734 | FECH                  | 4.41E-05   | 1.70168 |
| ARL2BP              | 1.71E-06 | -1.70868 | WDR7              | 0.00545964 | 1.66779 | TRAFD1                | 3.73E-06   | 1.70429 |
| ---                 | 3.28E-05 | -1.7082  | HEXIM1            | 2.84E-06   | 1.66805 | MAP3K5                | 9.73E-05   | 1.70431 |
| ZNF473              | 0.00012  | -1.70811 | LOC388135         | 0.0003352  | 1.6689  | PPAPDC1B              | 8.28E-06   | 1.70573 |
| CREBBP              | 0.00202  | -1.70798 | ENDOD1            | 0.00022517 | 1.66934 | SIPA1                 | 1.72E-05   | 1.70694 |
| ---                 | 0.02439  | -1.70793 | NIPA1             | 0.00027738 | 1.66935 | EPOR                  | 0.00139201 | 1.70795 |
| MYO19               | 0.00625  | -1.70775 | AADACL1           | 0.00145457 | 1.6695  | FLYWCH1               | 0.00356327 | 1.70805 |
| MAD2L1              | 8.55E-06 | -1.70755 | HSPA1A /// HSPA1B | 3.88E-05   | 1.66994 | CPD                   | 9.21E-05   | 1.70964 |
| KIAA1333            | 9.59E-07 | -1.70712 | TNFRSF10B         | 0.00042606 | 1.67016 | INHA                  | 9.68E-07   | 1.71202 |
| RAD51C              | 1.15E-08 | -1.70681 | SMURF1            | 0.00401453 | 1.67018 | ABHD5                 | 0.0016746  | 1.71256 |
| ---                 | 2.92E-05 | -1.70672 | DNAJB9            | 0.00130687 | 1.67112 | ATP8A1                | 0.00159349 | 1.71318 |
| MAP3K6              | 0.00011  | -1.70652 | TNFRSF18          | 0.0226841  | 1.67137 | GFM1                  | 1.13E-08   | 1.71328 |
| MCC                 | 0.00555  | -1.70639 | TPST1             | 0.00020692 | 1.67159 | NARF                  | 1.45E-06   | 1.71348 |
| CACNG4              | 1.81E-05 | -1.70538 | TMEM33            | 1.86E-05   | 1.67184 | TSC22D3               | 6.72E-07   | 1.71375 |
| TMED5               | 0.00041  | -1.70502 | BAG4              | 3.53E-10   | 1.67217 | HSPA1A /// HSPA1B     | 8.90E-10   | 1.71443 |
| SPATS2              | 0.01527  | -1.70487 | NQO1              | 5.22E-07   | 1.67238 | FAM118A               | 0.00521    | 1.71573 |
| MEX3C               | 9.48E-06 | -1.70477 | CCPG1             | 1.90E-05   | 1.67257 | STAT1                 | 2.02E-07   | 1.71586 |
| ---                 | 3.83E-05 | -1.70473 | OSBPL9            | 1.96E-06   | 1.67426 | TMEM132A              | 0.00087951 | 1.71591 |
| COL4A5              | 0.00022  | -1.70446 | ASCC3             | 6.10E-05   | 1.67456 | GLUD2                 | 0.00316169 | 1.71615 |
| FXVD3               | 5.14E-07 | -1.70439 | LOC283345         | 0.00083012 | 1.67565 | STCH                  | 4.95E-06   | 1.71668 |
| CKAP2               | 7.54E-06 | -1.70418 | MT1X              | 6.12E-07   | 1.67574 | LRP12                 | 0.00384611 | 1.71719 |
| VAV3                | 0.00066  | -1.70397 | SRCAP             | 0.00010099 | 1.67575 | OSBPL9                | 1.35E-06   | 1.71829 |
| CPNE2               | 4.55E-06 | -1.70376 | EXOC6             | 0.00012616 | 1.67616 | 288 /// LOC389833 /// | 0.00069044 | 1.71857 |
| HIPK1               | 0.01753  | -1.70367 | ST8SIA4           | 6.19E-05   | 1.67681 | SMURF1                | 0.00107979 | 1.71875 |
| KTELC1              | 2.61E-07 | -1.70358 | CHMP5             | 1.75E-06   | 1.67795 | ---                   | 1.14E-06   | 1.71956 |
| PTGER3              | 0.0609   | -1.70356 | ANKRD5            | 1.93E-05   | 1.67905 | NAMPT                 | 8.04E-05   | 1.7202  |
| ---                 | 0.00134  | -1.70246 | LOC162993         | 1.41E-05   | 1.67973 | TMEM140               | 0.00737708 | 1.72079 |
| PAQR8               | 0.00383  | -1.70186 | ---               | 0.00157118 | 1.68002 | RORC                  | 0.00094042 | 1.72142 |
| ---                 | 0.0005   | -1.70153 | FECH              | 6.13E-09   | 1.68025 | PRR15                 | 5.46E-07   | 1.72188 |
| KIAA1333            | 5.32E-06 | -1.70065 | MVD               | 0.00046184 | 1.68038 | LPPR2                 | 1.48E-05   | 1.72296 |
| PHF15               | 3.99E-06 | -1.70032 | SRRD              | 1.87E-05   | 1.68099 | H19                   | 0.00049878 | 1.7246  |
| LOC439911           | 0.00164  | -1.70029 | ST6GALNAC4        | 0.00024886 | 1.68276 | SAT2                  | 5.74E-07   | 1.72497 |
| THOC2               | 8.44E-06 | -1.70017 | ARPC4 /// TTL3    | 0.00112233 | 1.68392 | AXUD1                 | 1.53E-05   | 1.72563 |
| KIAA0746 /// SERINC | 0.01503  | -1.69908 | 3-Mar             | 0.00346134 | 1.6843  | CHMP5                 | 1.17E-06   | 1.72576 |
| CDKN2C              | 0.00158  | -1.6988  | ISG20             | 3.01E-05   | 1.68477 | SP110                 | 0.00481382 | 1.72608 |
| HMGB3               | 1.82E-08 | -1.69874 | IFNGR1            | 4.42E-07   | 1.68483 | SNF1LK                | 2.19E-05   | 1.72632 |
| NBN                 | 1.37E-07 | -1.69859 | ISG20             | 2.14E-08   | 1.68533 | ST8SIA4               | 2.74E-05   | 1.72786 |

|                    |          |          |                        |            |         |                  |            |         |
|--------------------|----------|----------|------------------------|------------|---------|------------------|------------|---------|
| ANAPC5             | 2.62E-05 | -1.69851 | ITGB5                  | 7.34E-07   | 1.68539 | ---              | 0.00014744 | 1.7281  |
| CCDC75             | 3.60E-05 | -1.69828 | SENP2                  | 6.08E-06   | 1.68604 | SEC24A           | 2.42E-05   | 1.72882 |
| AREG /// LOC727738 | 4.62E-07 | -1.69799 | ST8SIA4                | 6.37E-05   | 1.68608 | YRDC             | 3.35E-07   | 1.72971 |
| LOC143381          | 1.02E-07 | -1.69788 | EID1                   | 1.47E-06   | 1.68697 | CPOX             | 1.26E-05   | 1.72982 |
| ---                | 0.00032  | -1.69785 | SLC23A2                | 0.0480782  | 1.68714 | NDUFV3           | 0.00018173 | 1.72997 |
| CBX3               | 7.64E-07 | -1.69762 | PACSIN1                | 0.00896034 | 1.68767 | DYRK2            | 5.93E-05   | 1.73025 |
| ---                | 0.00231  | -1.69725 | DYRK2                  | 8.22E-05   | 1.68812 | TMEM30A          | 4.93E-08   | 1.73046 |
| ---                | 0.0039   | -1.69709 | B2M                    | 0.0105976  | 1.68959 | SLC12A2          | 4.90E-06   | 1.73068 |
| CXXC5              | 2.68E-09 | -1.69647 | ---                    | 0.00494828 | 1.69007 | C5orf41          | 0.00010966 | 1.73082 |
| ANXA2              | 2.31E-07 | -1.69611 | SLC30A9                | 3.20E-06   | 1.69113 | C7orf42          | 9.16E-06   | 1.73114 |
| PRSS23             | 0.02247  | -1.69604 | NLRP1                  | 0.00707714 | 1.69215 | ---              | 0.00096138 | 1.73164 |
| TOX2               | 0.00101  | -1.696   | EPHX1                  | 7.74E-07   | 1.69264 | TRAMIL1          | 0.0254856  | 1.73171 |
| DNM1               | 2.22E-07 | -1.69536 | SHISA5                 | 7.61E-07   | 1.69412 | MTERFD2          | 1.29E-06   | 1.73179 |
| HPSE               | 0.01259  | -1.69467 | TMEM191A               | 1.32E-05   | 1.69559 | EDN1             | 0.00617712 | 1.7341  |
| ---                | 0.00958  | -1.6946  | PMP22                  | 6.53E-07   | 1.69658 | SP100            | 4.45E-07   | 1.73442 |
| LRRFIP2            | 1.63E-06 | -1.69426 | SYT12                  | 0.00120966 | 1.69661 | TAP1             | 6.96E-06   | 1.73504 |
| SENP1              | 0.02281  | -1.69354 | ---                    | 1.71E-05   | 1.69662 | ERLIN2           | 3.24E-05   | 1.73655 |
| CDCA7L             | 1.17E-06 | -1.69348 | ARG2                   | 0.00669827 | 1.69699 | C12orf26         | 5.76E-06   | 1.7366  |
| FLJ40125           | 0.00097  | -1.69304 | POLR3G                 | 0.0297975  | 1.69728 | KCTD6            | 8.79E-05   | 1.73697 |
| LBR                | 1.20E-06 | -1.69294 | C14orf100              | 9.87E-07   | 1.69742 | STBD1            | 0.00020268 | 1.73738 |
| UBE3B              | 1.98E-06 | -1.69282 | CPD                    | 0.0057904  | 1.69751 | C15orf17         | 0.00010638 | 1.73916 |
| ADNP               | 7.34E-07 | -1.69271 | LEPRE1                 | 0.00028786 | 1.69764 | S100A14          | 2.67E-07   | 1.73917 |
| EFHC1              | 3.31E-07 | -1.69219 | RPS27L                 | 0.00134566 | 1.69854 | EID1             | 6.99E-05   | 1.73933 |
| FNIP2              | 0.00316  | -1.69198 | PDLIM2                 | 3.33E-05   | 1.69891 | PRR5             | 0.0151421  | 1.74026 |
| LOC100132884       | 0.00015  | -1.69195 | ---                    | 0.00246546 | 1.70017 | KLF5             | 3.93E-06   | 1.74076 |
| KCNJ3              | 0.0072   | -1.69166 | KITLG                  | 4.94E-07   | 1.70133 | NKRD23 /// ANKRD | 0.00037895 | 1.74086 |
| NAB1               | 0.01355  | -1.6914  | METTL7B                | 0.00193462 | 1.70253 | LOC283345        | 0.00052203 | 1.74156 |
| NPY1R              | 1.26E-06 | -1.69118 | SLC2A6                 | 1.76E-06   | 1.703   | LOC100131989     | 0.0232806  | 1.74201 |
| HNRNPA3            | 7.81E-06 | -1.69081 | // MICA /// MICB /// X | 1.00E-08   | 1.70326 | BPGM             | 3.43E-05   | 1.74216 |
| ---                | 0.00103  | -1.69057 | B3GNT2                 | 0.00016804 | 1.70329 | SHROOM3          | 1.33E-05   | 1.74233 |
| ---                | 0.00052  | -1.68955 | TLE2                   | 4.77E-06   | 1.70371 | VAMP4            | 0.00033042 | 1.744   |
| BCL2L12            | 1.05E-06 | -1.68943 | BAG1                   | 0.00059231 | 1.70385 | CHD1             | 9.51E-07   | 1.74437 |
| NUDT21             | 7.00E-05 | -1.68931 | HEXIM2                 | 0.00205229 | 1.70415 | CCPG1            | 0.00411254 | 1.74565 |
| SPTLC2             | 0.00016  | -1.68929 | PCTK2                  | 0.00035429 | 1.70641 | ---              | 0.00010436 | 1.7458  |
| C20orf142          | 5.93E-05 | -1.68902 | C17orf39               | 0.00039906 | 1.70694 | ---              | 5.89E-05   | 1.74765 |
| RAB3IP             | 0.0119   | -1.68873 | ---                    | 0.00770336 | 1.70723 | MLF1             | 0.00062736 | 1.74786 |
| ---                | 0.00315  | -1.68862 | SCO2                   | 6.76E-05   | 1.70794 | CNP              | 6.46E-06   | 1.74801 |
| PRKRIR             | 2.73E-07 | -1.68831 | INSIG2                 | 4.82E-06   | 1.70822 | LOC440957        | 0.00012316 | 1.74833 |
| UQCRC2             | 0.00012  | -1.68825 | KIAA1429               | 0.00826424 | 1.70916 | ATP11B           | 0.0017552  | 1.74842 |
| INTS7              | 2.29E-06 | -1.68783 | HEXIM1                 | 5.54E-06   | 1.7095  | GRIK2            | 0.0174335  | 1.74921 |
| MPP2               | 0.016    | -1.68767 | PSME1                  | 4.23E-06   | 1.71012 | SULT1A2          | 6.42E-07   | 1.74969 |
| KIAA1333           | 2.67E-05 | -1.68744 | MT1X                   | 1.47E-06   | 1.71072 | C14orf100        | 6.42E-07   | 1.74981 |
| WFS1               | 5.77E-06 | -1.68708 | IFITM2                 | 1.02E-08   | 1.71115 | ASNS             | 9.29E-07   | 1.75016 |
| TMCO6              | 0.00055  | -1.68673 | RRAS2                  | 1.75E-06   | 1.7123  | UBE2L6           | 1.94E-07   | 1.75034 |
| ---                | 0.00035  | -1.68658 | AGA                    | 6.77E-06   | 1.71248 | ---              | 0.00742453 | 1.75103 |
| ---                | 0.00215  | -1.68631 | OSBPL6                 | 0.0195022  | 1.71252 | IGFBP5           | 1.08E-06   | 1.75155 |
| EFCAB7             | 0.00054  | -1.68578 | STEAP3                 | 0.0028172  | 1.71286 | PPP1R3B          | 0.00017436 | 1.75379 |
| CDH26              | 0.00191  | -1.68576 | ITCH                   | 3.28E-05   | 1.71318 | FAM62B           | 0.00745925 | 1.75407 |
| ANXA2              | 6.14E-07 | -1.68572 | C2orf15                | 0.00114398 | 1.71392 | TBX3             | 0.00369618 | 1.75407 |

|                     |          |          |                      |            |         |                   |            |         |
|---------------------|----------|----------|----------------------|------------|---------|-------------------|------------|---------|
| ---                 | 0.00681  | -1.68454 | SLC25A12             | 0.00364637 | 1.71423 | IRF9              | 1.00E-08   | 1.75471 |
| HSBP1               | 4.72E-08 | -1.68448 | CARS                 | 0.00155899 | 1.71441 | STAT1             | 1.07E-06   | 1.75491 |
| ---                 | 9.40E-05 | -1.68441 | C1orf108             | 8.52E-06   | 1.71528 | ---               | 0.00019703 | 1.75493 |
| H2AFV               | 6.18E-08 | -1.68424 | RAB27B               | 4.26E-07   | 1.71569 | ITPR2             | 0.00093773 | 1.75531 |
| DNMT3B              | 5.35E-06 | -1.68412 | ANXA7                | 2.77E-06   | 1.71653 | CMTM8             | 6.85E-05   | 1.75567 |
| ---                 | 1.64E-05 | -1.68402 | MAP3K5               | 8.75E-05   | 1.7182  | C18orf1           | 0.00559663 | 1.7566  |
| NFIC                | 0.00029  | -1.68399 | GPR143               | 4.45E-05   | 1.71862 | RPS6KA5           | 0.00016484 | 1.75688 |
| ARL13B              | 0.00059  | -1.6839  | FST                  | 0.00012832 | 1.71879 | CCL5              | 0.00092935 | 1.75734 |
| CHAF1A              | 0.00011  | -1.68351 | LGALS8               | 1.44E-05   | 1.71992 | FAAH2             | 0.00053609 | 1.75875 |
| ARF3                | 3.59E-06 | -1.68323 | ---                  | 8.80E-05   | 1.72013 | JAG1              | 3.68E-05   | 1.76058 |
| ---                 | 0.00201  | -1.68311 | KLF5                 | 4.62E-06   | 1.7204  | SERPINA3          | 6.47E-07   | 1.7606  |
| ZNF551              | 5.44E-05 | -1.68298 | MSI2                 | 6.49E-05   | 1.72197 | LOC145837         | 0.00023813 | 1.76241 |
| RAB11A              | 1.11E-05 | -1.68288 | ---                  | 2.32E-05   | 1.72203 | ARL4C             | 0.00195791 | 1.76277 |
| AAK1                | 0.00121  | -1.68249 | GFPT2                | 0.00047933 | 1.72207 | KIAA1429          | 0.00615624 | 1.76324 |
| ---                 | 0.00274  | -1.68222 | ARPC4 /// TTL3       | 1.80E-05   | 1.72273 | GFPT2             | 0.00036025 | 1.76394 |
| I00134366 /// PLGLA | 0.01243  | -1.68218 | TMEM132A             | 0.00083914 | 1.72283 | 3-Mar             | 0.0020932  | 1.76584 |
| XPO6                | 0.00014  | -1.68136 | PSME4                | 2.61E-05   | 1.72288 | CXorf56           | 1.08E-05   | 1.76602 |
| C7orf11             | 7.08E-06 | -1.68065 | POLR3H               | 5.18E-06   | 1.7234  | TMEM30A           | 1.26E-05   | 1.76888 |
| NESPAS              | 0.00104  | -1.68053 | LGALS8               | 1.24E-07   | 1.72465 | ANKRD5            | 9.45E-06   | 1.7693  |
| SAMD1               | 7.97E-05 | -1.68027 | LOC161527 /// PML    | 0.00045566 | 1.72652 | SLC6A8            | 0.00013208 | 1.77032 |
| FBXO7               | 2.52E-08 | -1.68017 | JAG1                 | 4.75E-05   | 1.72681 | IGFBP5            | 0.00029279 | 1.77387 |
| EHBP1L1             | 2.97E-05 | -1.67975 | ARRB1                | 0.00031901 | 1.72738 | HEXIM1            | 3.32E-06   | 1.77513 |
| ---                 | 6.79E-06 | -1.67965 | ONECUT2              | 0.00010457 | 1.72746 | RNF213            | 0.00080201 | 1.77556 |
| RANBP17             | 0.00019  | -1.67957 | /// DNAH14 /// RP11- | 5.03E-05   | 1.72891 | SOX9              | 0.00247057 | 1.77625 |
| ---                 | 0.00226  | -1.67957 | TRPC1                | 7.58E-05   | 1.72949 | HSPA1A /// HSPA1B | 1.68E-05   | 1.77732 |
| C16orf44            | 5.25E-06 | -1.67893 | HLA-C                | 8.43E-09   | 1.73035 | FECH              | 2.71E-09   | 1.77756 |
| MAPK3               | 0.00016  | -1.67888 | BRMS1L               | 0.00218609 | 1.73074 | FKBP11            | 3.12E-08   | 1.77758 |
| CTSD                | 1.22E-06 | -1.67881 | ISCU                 | 8.26E-10   | 1.73115 | FFAR2             | 0.00141429 | 1.77793 |
| ZNF398              | 2.56E-06 | -1.67842 | LARP2                | 9.43E-06   | 1.73115 | NQO1              | 2.68E-10   | 1.77921 |
| ZNF559              | 0.01013  | -1.67838 | IFNGR1               | 0.00028381 | 1.73136 | ---               | 0.0012055  | 1.77955 |
| DDEF2               | 2.46E-08 | -1.67812 | BATF2                | 0.00199922 | 1.73348 | SCCPDH            | 1.45E-06   | 1.78053 |
| TCEA3               | 0.00092  | -1.67773 | EHD3                 | 0.00030981 | 1.7346  | IFITM1            | 5.98E-06   | 1.78246 |
| ---                 | 0.00801  | -1.67771 | OGFR                 | 8.47E-05   | 1.73478 | ---               | 0.00098051 | 1.78261 |
| RHOC                | 0.0066   | -1.67764 | SYNGR3               | 8.83E-05   | 1.73542 | BMPR2             | 2.43E-07   | 1.7838  |
| MAFB                | 4.94E-07 | -1.67742 | OTUB2                | 0.0340415  | 1.73573 | RDH11             | 4.61E-08   | 1.7879  |
| TMEM201             | 0.00197  | -1.67721 | LHPP                 | 0.00175986 | 1.73752 | PSTK              | 0.0260891  | 1.78848 |
| SLC39A8             | 5.60E-06 | -1.67694 | CXorf56              | 1.33E-05   | 1.73769 | LIMA1             | 0.0440195  | 1.78878 |
| M1 /// CALM2 /// CA | 8.26E-06 | -1.67673 | PTCH1                | 0.00122728 | 1.73794 | PPM1K             | 2.70E-06   | 1.78896 |
| SSU72               | 0.00534  | -1.67555 | HRBL                 | 7.44E-06   | 1.73819 | PDCD4             | 5.34E-07   | 1.78996 |
| ZC3H6               | 0.00059  | -1.67553 | RRN3                 | 0.00019904 | 1.73964 | HS6ST3            | 7.90E-05   | 1.79082 |
| KLHDC4              | 0.00137  | -1.67529 | ---                  | 1.03E-06   | 1.74014 | CTSC              | 0.00127994 | 1.79145 |
| ZNF148              | 4.88E-05 | -1.67518 | NFYA                 | 0.00027153 | 1.74056 | MMP16             | 0.0219793  | 1.79238 |
| DLG3                | 0.00012  | -1.67484 | MAGOHB               | 0.00022589 | 1.74141 | ANKRD5            | 0.00010873 | 1.79468 |
| FLJ22222            | 0.00015  | -1.67474 | CXorf39              | 4.45E-07   | 1.7436  | ISCU              | 4.96E-10   | 1.79519 |
| PLEKHA6             | 0.00011  | -1.67468 | OC100133916 /// MED  | 0.0016284  | 1.74419 | CFB               | 8.83E-07   | 1.79523 |
| PRDM6               | 4.31E-06 | -1.67452 | PAK6                 | 0.00077339 | 1.74478 | BTG3              | 0.00021672 | 1.79525 |
| ---                 | 1.43E-06 | -1.67423 | PSME2                | 3.93E-07   | 1.74646 | HEXIM2            | 0.00116161 | 1.79579 |
| LOC402778           | 2.22E-05 | -1.67405 | KLHL7                | 0.00129516 | 1.74658 | TMEM117           | 7.57E-06   | 1.79583 |
| HFE                 | 0.00152  | -1.674   | DNAJC15              | 2.02E-07   | 1.74702 | NRBP1             | 4.94E-08   | 1.79648 |



|                     |          |          |              |            |         |                      |            |         |
|---------------------|----------|----------|--------------|------------|---------|----------------------|------------|---------|
| ARCN1               | 2.03E-06 | -1.67396 | PPAP2C       | 5.15E-07   | 1.74767 | ---                  | 0.00088562 | 1.79669 |
| THOP1               | 0.00662  | -1.67362 | KCTD6        | 8.12E-05   | 1.74775 | MAOA                 | 0.00014881 | 1.79732 |
| H2AFX               | 5.45E-07 | -1.67358 | ANKRD5       | 0.00014912 | 1.74867 | OXTR                 | 0.0102519  | 1.79757 |
| ZNF148              | 0.00228  | -1.67349 | PSTK         | 0.030661   | 1.74916 | LMF1                 | 0.0025918  | 1.7987  |
| NRSN2               | 0.00408  | -1.67315 | MMP9         | 0.00114294 | 1.74936 | RABGAP1L             | 0.00648139 | 1.79879 |
| WEE1                | 2.01E-06 | -1.67284 | RDX          | 4.95E-09   | 1.74965 | PPAP2B               | 0.00031467 | 1.79909 |
| DAK                 | 4.32E-05 | -1.6725  | ---          | 4.10E-05   | 1.75447 | PMM1                 | 0.00209849 | 1.79941 |
| NAP1L1              | 0.00037  | -1.67216 | BIK          | 1.75E-05   | 1.75494 | GOLT1A               | 1.53E-05   | 1.80202 |
| S1PR5               | 0.0015   | -1.67208 | STCH         | 8.50E-06   | 1.75497 | LPIN1                | 3.86E-06   | 1.80215 |
| ---                 | 0.00043  | -1.67194 | ---          | 1.25E-08   | 1.75528 | AP8 /// LOC553158 // | 2.72E-09   | 1.80249 |
| LOC728198 /// TAF9E | 0.00034  | -1.67151 | JMJD6        | 0.00023582 | 1.75547 | ---                  | 0.00131617 | 1.80258 |
| SIAE                | 3.13E-05 | -1.67051 | FSD1         | 1.39E-06   | 1.75577 | ---                  | 0.00024021 | 1.80312 |
| ---                 | 1.16E-05 | -1.67021 | CIDEC        | 4.45E-06   | 1.75715 | MOBKL2A              | 3.72E-05   | 1.80554 |
| SLC16A14            | 0.00727  | -1.66977 | ---          | 0.00599772 | 1.75721 | ONECUT2              | 6.03E-05   | 1.80564 |
| ---                 | 0.00117  | -1.66959 | SLIT1        | 0.00021266 | 1.75917 | UHRF1BP1L            | 7.45E-05   | 1.80583 |
| ZNF418              | 0.0028   | -1.66937 | PDCD4        | 6.71E-07   | 1.7599  | KIAA1539             | 4.78E-06   | 1.80761 |
| PLEKHG2             | 1.95E-05 | -1.66933 | FBXO2        | 9.83E-06   | 1.7628  | F2RL1                | 0.0006185  | 1.80842 |
| KATNB1              | 0.01464  | -1.66878 | MLF1         | 0.00056674 | 1.76337 | LARP4                | 0.0144986  | 1.80847 |
| ---                 | 0.01103  | -1.66874 | CCL2         | 0.00489255 | 1.7651  | ---                  | 0.00265716 | 1.80893 |
| GNA12               | 2.80E-07 | -1.66851 | SEN5         | 3.35E-05   | 1.76562 | SLC5A3               | 6.40E-06   | 1.81111 |
| LEPR                | 0.00111  | -1.66837 | ABC9         | 0.00012838 | 1.76599 | FBXO3                | 1.86E-06   | 1.812   |
| TMEM137             | 0.00028  | -1.66824 | PHLDA2       | 9.12E-09   | 1.76613 | WWP1                 | 0.00044968 | 1.81214 |
| ---                 | 0.00038  | -1.66741 | FAM80A       | 4.67E-05   | 1.76763 | SP110                | 4.40E-08   | 1.81268 |
| ---                 | 2.39E-06 | -1.66723 | EDN1         | 0.0051214  | 1.76835 | SPAG1                | 5.23E-05   | 1.81292 |
| MPZL1               | 0.00029  | -1.66711 | NRBP1        | 6.01E-08   | 1.77069 | GRAMD3               | 5.10E-06   | 1.81385 |
| CTDSPL2             | 0.00051  | -1.66708 | RIT1         | 1.39E-09   | 1.77361 | CHRD                 | 0.00214111 | 1.81485 |
| ---                 | 0.01154  | -1.66707 | SYT1         | 1.29E-05   | 1.77451 | BAT2D1               | 9.52E-05   | 1.81492 |
| QSER1               | 0.00447  | -1.66649 | FXR1         | 1.81E-06   | 1.77589 | SP110                | 9.08E-08   | 1.81533 |
| ---                 | 0.00038  | -1.66619 | DNAJA1       | 1.08E-06   | 1.77707 | EID1                 | 1.35E-05   | 1.81563 |
| ---                 | 4.70E-05 | -1.66616 | ---          | 1.31E-06   | 1.78351 | ST8SIA4              | 2.43E-05   | 1.81694 |
| SAFB2               | 1.14E-05 | -1.66595 | ---          | 0.00096253 | 1.78369 | GDPD1                | 0.012053   | 1.81922 |
| PPP1R3D             | 2.29E-05 | -1.66564 | PRR15        | 3.34E-07   | 1.78443 | FXR1                 | 1.32E-06   | 1.81944 |
| PACS2               | 9.80E-07 | -1.66547 | RANGRF       | 0.00026857 | 1.78575 | IRF1                 | 1.73E-06   | 1.81975 |
| DOCK6               | 3.50E-05 | -1.66539 | TNFRSF10B    | 0.00035761 | 1.78592 | TRAFD1               | 9.26E-07   | 1.82006 |
| ---                 | 0.00734  | -1.66524 | PPAPDC1B     | 4.38E-06   | 1.78809 | TMEM68               | 0.00010325 | 1.82073 |
| NCOA1               | 0.00043  | -1.66488 | MOBKL2A      | 4.19E-05   | 1.78816 | EID1                 | 5.14E-07   | 1.82096 |
| ZNF718              | 0.00015  | -1.66442 | BNIP1        | 0.00022894 | 1.7887  | GCNT1                | 2.78E-05   | 1.82155 |
| ATAD2               | 0.0002   | -1.66438 | ---          | 4.78E-05   | 1.78905 | HS6ST2               | 0.0237239  | 1.82183 |
| VRK3                | 2.13E-05 | -1.66432 | OSMR         | 2.48E-05   | 1.78965 | PAQR5                | 0.072926   | 1.82371 |
| FUBP3               | 0.00021  | -1.66405 | MEIS2        | 5.00E-05   | 1.79136 | C12orf5              | 3.48E-05   | 1.82463 |
| ZXDC                | 2.68E-05 | -1.66362 | P2RX2        | 0.0048723  | 1.79166 | AADAACL1             | 0.00052787 | 1.82529 |
| RAD51L1             | 0.00087  | -1.66275 | TNF          | 0.00013686 | 1.79177 | CCPG1                | 5.90E-06   | 1.82574 |
| ---                 | 8.05E-05 | -1.6627  | DNAJC12      | 1.32E-07   | 1.79224 | CTNNB1               | 0.00015061 | 1.82584 |
| C6orf89             | 1.12E-06 | -1.66259 | LIN7B        | 3.25E-06   | 1.79246 | CYFIP2               | 3.06E-07   | 1.82603 |
| PPP1R3D             | 0.00225  | -1.66244 | SSH1         | 0.0005663  | 1.79253 | SYT12                | 0.00052768 | 1.82638 |
| RSBN1               | 1.76E-05 | -1.66233 | LOC100130506 | 0.00014595 | 1.79287 | PNKD                 | 4.12E-07   | 1.82849 |
| PCOLCE              | 0.00015  | -1.6613  | PLAUR        | 0.00145063 | 1.79323 | GAD1                 | 0.00088754 | 1.82852 |
| DPYD                | 0.02829  | -1.66115 | GOLT1A       | 1.63E-05   | 1.79327 | KDEL3                | 3.52E-07   | 1.82935 |
| MUM1                | 0.0004   | -1.66081 | SULT1A1      | 1.02E-05   | 1.79365 | PPAP2C               | 2.77E-07   | 1.83079 |

|           |          |          |                      |            |         |                      |            |         |
|-----------|----------|----------|----------------------|------------|---------|----------------------|------------|---------|
| PPA2      | 4.06E-09 | -1.66025 | SSBP2                | 2.34E-06   | 1.794   | LPIN1                | 1.90E-05   | 1.8309  |
| ---       | 0.0082   | -1.66007 | LRRC23               | 0.00017788 | 1.79433 | C6orf1               | 1.47E-06   | 1.83094 |
| PXDN      | 3.13E-05 | -1.65972 | CHMP5                | 0.00123743 | 1.79502 | SHC4                 | 0.0240358  | 1.83141 |
| ---       | 0.00288  | -1.65964 | PVRL2                | 0.00037536 | 1.7967  | RHO                  | 5.26E-05   | 1.832   |
| ---       | 2.29E-07 | -1.65952 | SLC16A9              | 5.61E-05   | 1.797   | SLC7A11              | 2.89E-05   | 1.83219 |
| TUBD1     | 9.25E-08 | -1.65894 | SLC35C1              | 3.02E-06   | 1.79917 | PLEKHH2              | 0.00013822 | 1.83507 |
| ---       | 4.66E-05 | -1.65859 | TMEM135              | 4.95E-06   | 1.80179 | ---                  | 3.21E-06   | 1.83765 |
| ---       | 0.00486  | -1.65842 | TNFRSF10A            | 0.00059744 | 1.8026  | SULT1A1              | 7.43E-06   | 1.83931 |
| ERC1      | 0.00019  | -1.65816 | PIB5PA               | 0.00040603 | 1.80265 | LOC126075            | 0.00391251 | 1.83962 |
| MGC4172   | 0.03088  | -1.65808 | KLHL7                | 1.68E-06   | 1.80285 | TRAFD1               | 0.00026061 | 1.84044 |
| RECQL     | 0.00092  | -1.65764 | VAMP4                | 0.00022136 | 1.80439 | PLA2G10              | 0.0137643  | 1.84066 |
| SYNE2     | 5.75E-05 | -1.65727 | PVRL2                | 1.69E-07   | 1.80571 | FZD8                 | 0.0397643  | 1.84089 |
| SLC25A15  | 6.64E-05 | -1.65631 | INTS6                | 5.43E-05   | 1.80588 | LOC100130097         | 0.00526406 | 1.84101 |
| PPIB      | 9.46E-09 | -1.65611 | FAM131A              | 2.17E-05   | 1.8059  | NBEA                 | 1.67E-06   | 1.84142 |
| ---       | 0.01098  | -1.65604 | CTHRC1               | 0.00010895 | 1.80642 | SSBP2                | 1.66E-06   | 1.84243 |
| C20orf121 | 1.05E-05 | -1.65595 | ELF5                 | 0.00079109 | 1.80652 | LOC285074            | 0.00012764 | 1.84271 |
| TMEM30A   | 0.00022  | -1.65575 | FAM107B              | 7.20E-08   | 1.80703 | ANKRD6               | 1.35E-05   | 1.84301 |
| ---       | 1.25E-05 | -1.65574 | ---                  | 3.94E-06   | 1.80834 | SLC41A1              | 1.05E-05   | 1.84414 |
| FRMD4A    | 4.02E-05 | -1.65568 | KIAA1539             | 1.54E-06   | 1.80912 | CLMN                 | 3.66E-05   | 1.84532 |
| MOBK1B    | 7.95E-05 | -1.65536 | GPR180               | 0.00014734 | 1.80916 | PSD3                 | 1.59E-06   | 1.84627 |
| BICD2     | 8.39E-07 | -1.65533 | SLC45A4              | 0.00154232 | 1.80947 | AP8 /// LOC553158 // | 4.25E-07   | 1.84757 |
| DAP       | 9.45E-06 | -1.65522 | LOC339984            | 0.00064518 | 1.81089 | ENTPD4               | 1.40E-06   | 1.8484  |
| NBL1      | 4.33E-06 | -1.65483 | PCSK6                | 0.00016528 | 1.81187 | IFI30 /// PIK3R2     | 1.13E-07   | 1.84886 |
| KIAA0280  | 2.11E-06 | -1.65463 | ZBTB10               | 0.000601   | 1.81372 | EML2                 | 0.0010896  | 1.8503  |
| ---       | 3.77E-05 | -1.65421 | BHLHB2               | 0.00052339 | 1.8141  | CLN5                 | 0.00158568 | 1.85065 |
| ---       | 6.52E-07 | -1.65418 | YRDC                 | 1.74E-07   | 1.81499 | PIR                  | 2.73E-07   | 1.85117 |
| MYEF2     | 0.00015  | -1.65385 | KIAA1429             | 0.0025795  | 1.81786 | EHD3                 | 0.00014413 | 1.85193 |
| RREB1     | 0.00385  | -1.65353 | MTF2                 | 1.16E-05   | 1.81796 | FGFR4                | 0.00672791 | 1.8529  |
| ---       | 0.01026  | -1.65269 | NDUFA6               | 2.33E-08   | 1.81981 | ZBTB10               | 0.00047335 | 1.85448 |
| MLLT4     | 1.23E-06 | -1.65235 | AXUD1                | 7.62E-06   | 1.82046 | RRAS2                | 6.02E-07   | 1.85546 |
| ---       | 5.93E-05 | -1.65229 | NUCB2                | 6.89E-05   | 1.82163 | ARHGAP18             | 0.00490889 | 1.85696 |
| C10orf6   | 6.14E-06 | -1.65206 | ---                  | 0.00108478 | 1.8266  | ABC9                 | 7.03E-05   | 1.85815 |
| MYB       | 2.12E-07 | -1.65206 | ST3GAL5              | 1.66E-07   | 1.82662 | LOC145837            | 0.00077348 | 1.8586  |
| TMEM48    | 2.47E-05 | -1.65187 | TRPC1                | 6.58E-05   | 1.8267  | DHRX                 | 0.00076952 | 1.85964 |
| IPO9      | 1.15E-07 | -1.65184 | ---                  | 0.0207539  | 1.82671 | TPST2                | 0.00042979 | 1.86087 |
| ---       | 1.66E-05 | -1.65137 | QPRT                 | 1.93E-07   | 1.82692 | ---                  | 5.62E-09   | 1.86413 |
| PTPRF     | 2.33E-07 | -1.65118 | SYT1                 | 2.67E-06   | 1.82906 | SHROOM3              | 1.40E-06   | 1.86523 |
| BDH2      | 9.64E-06 | -1.651   | A-C /// MICA /// MIC | 8.07E-07   | 1.82944 | ELL2                 | 5.68E-05   | 1.86631 |
| ---       | 0.01164  | -1.65063 | PSTPIP2              | 0.00174208 | 1.83125 | RAB27B               | 0.00270114 | 1.86783 |
| UBE2J1    | 7.15E-07 | -1.65063 | TMEM68               | 9.53E-05   | 1.83325 | GGPS1                | 0.00047286 | 1.86832 |
| ---       | 0.00579  | -1.65034 | SLCO4C1              | 0.00546618 | 1.8343  | TGFBR2               | 1.24E-06   | 1.8694  |
| ---       | 2.44E-05 | -1.65028 | NAMPT                | 3.61E-05   | 1.83444 | FAS                  | 0.00342418 | 1.86996 |
| SLC25A19  | 0.00707  | -1.6502  | RAB11FIP1            | 5.05E-05   | 1.83472 | SNX8                 | 6.50E-07   | 1.87144 |
| PLEKHG2   | 1.36E-05 | -1.65007 | SLC6A8               | 8.62E-05   | 1.83495 | PIGL                 | 0.00048652 | 1.87185 |
| ITGB4     | 6.60E-09 | -1.64958 | PRKD2                | 6.19E-07   | 1.83671 | RPS27L               | 0.00046111 | 1.87189 |
| WDR67     | 1.75E-05 | -1.64936 | IRF9                 | 5.36E-09   | 1.83774 | QPRT                 | 1.42E-07   | 1.87204 |
| HHLA3     | 1.11E-05 | -1.64931 | HLA-C                | 3.10E-08   | 1.8386  | CHMP5                | 0.00079896 | 1.87255 |
| HNRNPA2B1 | 8.41E-08 | -1.64928 | COQ10A               | 0.00022025 | 1.8393  | C1orf78              | 2.99E-05   | 1.87503 |
| C3orf23   | 0.00055  | -1.64904 | HDX                  | 8.97E-08   | 1.8404  | LOC374443            | 9.19E-06   | 1.87628 |

|                   |          |          |                        |            |         |                      |            |         |
|-------------------|----------|----------|------------------------|------------|---------|----------------------|------------|---------|
| SPEN              | 0.00587  | -1.64891 | CNP                    | 3.32E-06   | 1.84071 | PPAP2B               | 0.00397596 | 1.87771 |
| LYK5              | 2.58E-07 | -1.64888 | GDPD1                  | 0.0109576  | 1.84082 | NRP1                 | 9.27E-06   | 1.8782  |
| LOC90379          | 0.00044  | -1.64888 | FAM84A                 | 3.90E-06   | 1.84087 | PLSCR1               | 5.02E-06   | 1.87847 |
| KIAA1333          | 1.94E-05 | -1.64865 | ING1                   | 1.34E-06   | 1.84382 | PCDH19               | 2.21E-07   | 1.87852 |
| ---               | 0.00066  | -1.64828 | LTB                    | 7.78E-05   | 1.84407 | ---                  | 1.20E-06   | 1.87869 |
| SFXN1             | 0.00068  | -1.64808 | EPOR                   | 0.00727001 | 1.84527 | PITX1                | 6.37E-05   | 1.87942 |
| ASCL1             | 1.59E-08 | -1.64737 | SLC16A3                | 4.83E-07   | 1.84647 | ZNF804A              | 2.98E-05   | 1.87951 |
| LOC144871         | 0.00163  | -1.64719 | FFAR2                  | 0.00095011 | 1.847   | NQO1                 | 1.05E-07   | 1.88109 |
| tcag7.1177        | 0.00035  | -1.64716 | ING1                   | 2.58E-06   | 1.84757 | CARS                 | 0.00056973 | 1.88266 |
| NAT1              | 1.07E-05 | -1.64713 | OGFR                   | 1.40E-06   | 1.85047 | MAN1A1               | 5.19E-05   | 1.88518 |
| EHBP1             | 0.00047  | -1.64621 | 562 /// SLC6A10P /// 5 | 0.00019065 | 1.85162 | SNRPC                | 1.52E-06   | 1.88616 |
| CBX6 /// NPTXR    | 0.00056  | -1.64596 | DNAJC16                | 0.0002098  | 1.85202 | KIAA1539             | 9.12E-07   | 1.88671 |
| CDV3              | 6.47E-06 | -1.64584 | LOC285074              | 0.00011963 | 1.85327 | LAMB1                | 4.27E-05   | 1.88742 |
| TRIM73 /// TRIM74 | 0.01277  | -1.64564 | MYCBP2                 | 4.88E-07   | 1.85391 | SLC16A3              | 3.58E-07   | 1.89191 |
| TUBG1             | 3.22E-08 | -1.64555 | ---                    | 1.03E-06   | 1.85397 | ---                  | 0.00397628 | 1.89348 |
| OSGEPL1           | 0.0011   | -1.6453  | CMTM8                  | 3.52E-05   | 1.85456 | SFXN1                | 3.59E-05   | 1.89439 |
| TCEA2             | 1.20E-07 | -1.64469 | SULT1A1                | 3.50E-06   | 1.85514 | KDEL3                | 8.04E-06   | 1.89459 |
| ICAM3             | 8.03E-06 | -1.64441 | BACE2                  | 2.41E-05   | 1.85622 | AQP3                 | 3.00E-06   | 1.89572 |
| DOLPP1            | 5.67E-06 | -1.6443  | STBD1                  | 9.21E-05   | 1.85683 | PRIC285              | 0.0145206  | 1.89576 |
| CASP8AP2          | 1.76E-06 | -1.64356 | DHRS2                  | 2.69E-07   | 1.85742 | PCTK2                | 7.83E-06   | 1.89633 |
| ZAK               | 0.00059  | -1.64347 | TRABD                  | 0.00043087 | 1.85915 | SLC1A1               | 2.10E-07   | 1.89784 |
| ---               | 0.00242  | -1.64345 | HS6ST2                 | 0.00215458 | 1.85955 | LMO3                 | 0.00108427 | 1.89879 |
| ZNF37A            | 3.25E-05 | -1.64331 | SOX9                   | 0.00155808 | 1.86028 | LGALS8               | 4.05E-06   | 1.90067 |
| PDK2              | 1.54E-05 | -1.64327 | EML2                   | 0.00102397 | 1.86172 | NRP1                 | 5.57E-06   | 1.90081 |
| ---               | 0.0001   | -1.64313 | C2orf37                | 0.0192152  | 1.8622  | TMTC3                | 1.27E-08   | 1.9037  |
| SGCE              | 0.00078  | -1.64258 | WWOX                   | 4.10E-05   | 1.86475 | ARFGAP3              | 3.33E-06   | 1.90626 |
| IL10RB            | 0.00014  | -1.6424  | CHST12                 | 1.13E-06   | 1.86504 | SP3                  | 1.26E-08   | 1.9084  |
| CBX7              | 0.00012  | -1.64195 | PRNP                   | 0.00018796 | 1.86554 | IGFBP5               | 0.00992095 | 1.90967 |
| PIR               | 1.45E-06 | -1.64183 | MFAP3L                 | 0.00532816 | 1.86648 | MSI2                 | 1.84E-05   | 1.90982 |
| ENSA              | 2.16E-08 | -1.64179 | SOX2                   | 1.06E-05   | 1.86719 | ---                  | 0.00011868 | 1.91203 |
| PDZRN3            | 0.02037  | -1.64178 | BTG3                   | 0.00013774 | 1.8683  | GPATCH2              | 5.13E-05   | 1.9139  |
| SGK3              | 7.05E-07 | -1.64174 | FLYWCH1                | 0.00143024 | 1.86869 | 562 /// SLC6A10P /// | 0.00013108 | 1.91639 |
| NUP50             | 3.34E-06 | -1.64167 | IFITM3                 | 9.11E-10   | 1.86909 | RP11-151A6.2         | 7.61E-10   | 1.91797 |
| MED12             | 8.09E-05 | -1.64156 | LOX                    | 0.00021001 | 1.8693  | NPNT                 | 1.44E-07   | 1.91874 |
| MAP4              | 0.00033  | -1.6414  | EIF2AK2                | 1.75E-07   | 1.87021 | LGALS8               | 3.06E-08   | 1.91884 |
| ---               | 0.02732  | -1.64087 | PVRL2                  | 0.00014537 | 1.87043 | SYT1                 | 4.94E-06   | 1.91919 |
| NASP              | 2.84E-07 | -1.64076 | SLC41A1                | 8.69E-06   | 1.87393 | MAOA                 | 0.00138515 | 1.91933 |
| KIAA1772          | 0.01768  | -1.64051 | PCTK2                  | 8.98E-06   | 1.87441 | PML                  | 4.23E-05   | 1.92123 |
| TOP2A             | 0.00765  | -1.63975 | PCDH8                  | 0.0165962  | 1.87523 | ---                  | 0.00036272 | 1.9214  |
| MOBK1B            | 4.05E-06 | -1.63949 | WWOX                   | 1.30E-05   | 1.87523 | ALAD                 | 3.11E-05   | 1.92146 |
| ---               | 0.00131  | -1.63916 | KLF6                   | 0.00013511 | 1.87559 | FUCA1                | 1.11E-07   | 1.92153 |
| LPHN1             | 6.16E-06 | -1.63849 | TRIB2                  | 2.39E-05   | 1.87747 | CAPS                 | 0.00044279 | 1.92179 |
| DSG2              | 0.00022  | -1.63813 | RNF213                 | 2.01E-08   | 1.87749 | NUCB2                | 3.71E-05   | 1.92292 |
| FAM54A            | 0.00088  | -1.63782 | TMTC3                  | 1.50E-08   | 1.87809 | ADRA2C               | 0.00015066 | 1.92347 |
| SLC35D2           | 0.00234  | -1.63768 | CXCL16                 | 0.00020374 | 1.87886 | ATP2C2               | 1.38E-06   | 1.92395 |
| CDC25A            | 0.02041  | -1.63695 | CHD1                   | 3.57E-07   | 1.88076 | ---                  | 2.63E-06   | 1.92488 |
| DNAJC9            | 2.59E-06 | -1.63647 | GALT                   | 2.42E-05   | 1.88105 | PRNP                 | 0.00013333 | 1.92587 |
| LOC401320         | 0.00236  | -1.6364  | HES4                   | 6.43E-06   | 1.88116 | KITLG                | 9.63E-08   | 1.92639 |
| FUS               | 1.64E-05 | -1.63613 | ADRA2C                 | 0.0001892  | 1.88294 | CORO1A               | 2.10E-05   | 1.92681 |

|                       |          |          |                        |            |         |           |            |         |
|-----------------------|----------|----------|------------------------|------------|---------|-----------|------------|---------|
| SAP130                | 2.42E-07 | -1.636   | SLC7A6 /// TRPV6       | 5.38E-05   | 1.88299 | RAB11FIP1 | 2.88E-05   | 1.92688 |
| ---                   | 0.00235  | -1.63572 | LOC100130742           | 2.71E-06   | 1.88426 | ---       | 0.00025188 | 1.92844 |
| IGF2                  | 0.02294  | -1.63562 | HSH2D                  | 6.98E-05   | 1.88643 | PVRL2     | 0.00017359 | 1.92858 |
| C10orf59              | 1.19E-05 | -1.63527 | GPATCH2                | 6.00E-05   | 1.88714 | C10orf30  | 0.00048427 | 1.929   |
| ---                   | 0.00053  | -1.6352  | C19orf63               | 8.46E-07   | 1.88815 | WIP1      | 1.05E-05   | 1.93141 |
| ---                   | 0.00734  | -1.63507 | CPEB2                  | 1.39E-06   | 1.8896  | QPCT      | 0.00098748 | 1.93173 |
| LOC100128191          | 0.00033  | -1.63488 | SPATA7                 | 2.02E-07   | 1.89058 | STAT1     | 6.03E-07   | 1.93191 |
| LOC113230             | 0.00045  | -1.63471 | ---                    | 0.00254375 | 1.8921  | LASS4     | 0.00122552 | 1.93209 |
| HDLBP                 | 3.17E-06 | -1.63418 | C6orf1                 | 9.76E-07   | 1.89299 | CA11      | 0.00020936 | 1.93239 |
| KCTD15                | 4.71E-05 | -1.6341  | FAM46A                 | 1.27E-07   | 1.89347 | CAB39L    | 6.15E-06   | 1.9324  |
| C6orf130              | 0.00011  | -1.63393 | SOCS1                  | 0.00671963 | 1.89516 | JAG1      | 1.21E-05   | 1.93255 |
| C12orf32              | 6.57E-08 | -1.63392 | KDELRL3                | 8.00E-06   | 1.8955  | ---       | 1.28E-05   | 1.93281 |
| ECHDC3                | 0.00099  | -1.6339  | ---                    | 0.00170752 | 1.89654 | EML2      | 4.09E-05   | 1.93645 |
| TAF8                  | 4.93E-05 | -1.63352 | PAQR5                  | 0.0591403  | 1.8966  | LPGAT1    | 1.28E-07   | 1.93747 |
| NFKBIL2               | 0.00042  | -1.63335 | DOCK8                  | 0.00559804 | 1.89793 | USP2      | 0.00867821 | 1.93789 |
| KDELRL2               | 3.27E-06 | -1.63335 | RP11-151A6.2           | 8.65E-10   | 1.89811 | SYT1      | 1.32E-06   | 1.93858 |
| PSIP1                 | 3.94E-07 | -1.63328 | ---                    | 0.00017568 | 1.89963 | TRAK1     | 0.00010554 | 1.94043 |
| SLC25A16              | 0.0002   | -1.63328 | ---                    | 0.00098422 | 1.89998 | RTCD1     | 1.37E-06   | 1.94222 |
| CDK3                  | 9.10E-05 | -1.63278 | CAMK2N1                | 1.43E-05   | 1.90024 | ---       | 1.33E-07   | 1.94266 |
| NUP50                 | 0.00161  | -1.63267 | MUCL1                  | 1.41E-06   | 1.90158 | UBE2W     | 4.19E-06   | 1.94442 |
| ---                   | 9.99E-05 | -1.63262 | RDX                    | 4.16E-06   | 1.90335 | TRIM14    | 3.67E-06   | 1.94456 |
| KIAA0226              | 6.97E-06 | -1.63257 | ---                    | 8.20E-05   | 1.90401 | LIN7B     | 0.00095093 | 1.94529 |
| DHX15                 | 7.03E-07 | -1.63146 | PHF11                  | 1.78E-07   | 1.90484 | PML       | 4.68E-05   | 1.94588 |
| SPDEF                 | 5.40E-07 | -1.63136 | GRAMD3                 | 2.80E-06   | 1.90512 | WWOX      | 8.46E-06   | 1.94607 |
| NUP210                | 1.35E-06 | -1.63124 | RNF7                   | 0.00531443 | 1.90701 | PLSCR1    | 2.03E-08   | 1.94747 |
| ---                   | 0.00424  | -1.63075 | NRP1                   | 5.33E-06   | 1.90798 | IGFBP3    | 0.00088997 | 1.95162 |
| ---                   | 1.42E-06 | -1.63065 | SHC4                   | 0.0178     | 1.91116 | C19orf63  | 5.62E-07   | 1.95466 |
| CYBASC3               | 1.25E-07 | -1.63057 | PKIA                   | 2.47E-05   | 1.91204 | SP110     | 1.14E-06   | 1.95503 |
| FANCM                 | 0.00428  | -1.63045 | UHRF1BP1L              | 3.81E-05   | 1.91393 | BAD       | 4.39E-05   | 1.95705 |
| WDR34                 | 2.39E-07 | -1.63007 | ASB9                   | 2.32E-06   | 1.91415 | TMTC3     | 8.27E-05   | 1.9603  |
| HIST1H4H /// HIST1H4A | 6.38E-06 | -1.62996 | LOC147650              | 3.38E-06   | 1.91483 | ARRB1     | 8.03E-07   | 1.96114 |
| NBPF4                 | 0.00048  | -1.62987 | RELL1                  | 1.43E-06   | 1.91552 | CAMK2B    | 0.00732082 | 1.96176 |
| ELOVL2                | 0.01354  | -1.62952 | CDYL2                  | 0.00396488 | 1.91692 | OAS3      | 5.65E-08   | 1.96379 |
| SP2                   | 5.19E-07 | -1.62883 | GLUD1                  | 0.00072013 | 1.91746 | ---       | 0.00055236 | 1.96584 |
| COL12A1               | 0.069    | -1.62845 | PRR5                   | 0.00680391 | 1.91748 | ---       | 0.00040512 | 1.96811 |
| LZTFL1                | 0.00123  | -1.62833 | FLRT3                  | 0.00098753 | 1.91787 | ARL5B     | 1.87E-05   | 1.96814 |
| HIC2                  | 5.05E-05 | -1.62819 | RPS27L                 | 1.24E-05   | 1.91853 | HES1      | 8.01E-09   | 1.96817 |
| C16orf57              | 0.01494  | -1.62813 | EML2                   | 4.52E-05   | 1.9189  | DNAJB9    | 0.00021493 | 1.96967 |
| DPYSL2                | 1.30E-08 | -1.62803 | FLJ22167               | 0.00034565 | 1.91965 | ---       | 2.79E-06   | 1.97206 |
| WFS1                  | 1.75E-05 | -1.62798 | C7orf42                | 2.48E-06   | 1.92042 | GPX3      | 2.30E-07   | 1.97425 |
| ZNF638                | 0.00095  | -1.62789 | LOC440836              | 0.0022945  | 1.92216 | IL27RA    | 0.00181211 | 1.9743  |
| ---                   | 0.01232  | -1.62777 | SNX8                   | 4.66E-07   | 1.92383 | AQP3      | 1.49E-05   | 1.97556 |
| DUT                   | 2.76E-07 | -1.62777 | NRP1                   | 6.98E-06   | 1.92455 | PCYT1A    | 0.00423853 | 1.97643 |
| PRR11                 | 1.04E-05 | -1.6274  | SOAT1                  | 0.00026179 | 1.92745 | SULT1A1   | 1.66E-06   | 1.97752 |
| ---                   | 3.61E-06 | -1.62736 | BTG2                   | 0.00040838 | 1.92891 | RDH11     | 2.30E-07   | 1.97794 |
| ---                   | 5.75E-05 | -1.6269  | // MICA /// MICB /// X | 1.37E-07   | 1.9304  | ECH1      | 9.26E-07   | 1.97834 |
| ---                   | 0.00019  | -1.62681 | SLC7A5                 | 4.23E-08   | 1.93046 | KLHL2     | 1.65E-05   | 1.97935 |
| DOC2A                 | 0.00037  | -1.62664 | WIP1                   | 5.13E-05   | 1.93404 | ARRB1     | 6.83E-05   | 1.98019 |
| C14orf80              | 7.50E-06 | -1.62647 | LMO3                   | 0.00090421 | 1.9349  | DNAJC16   | 0.00010228 | 1.98126 |

|                   |          |          |                    |            |         |           |            |         |
|-------------------|----------|----------|--------------------|------------|---------|-----------|------------|---------|
| DNMT3A            | 1.88E-06 | -1.62623 | BTBD14A            | 0.0025899  | 1.93631 | KCNJ3     | 0.00162449 | 1.98283 |
| NKRD52 /// UNQ583 | 7.09E-06 | -1.6256  | ALAD               | 2.85E-05   | 1.93687 | SLC23A2   | 0.00052081 | 1.98728 |
| ELF4              | 4.71E-07 | -1.62541 | SSH1               | 2.96E-05   | 1.93964 | LOC286440 | 6.53E-05   | 1.99468 |
| NUP62             | 0.00013  | -1.62536 | ---                | 0.00030152 | 1.94304 | STEAP3    | 1.12E-06   | 1.99533 |
| LOC150051         | 0.01177  | -1.62498 | SPATA17            | 2.18E-05   | 1.94364 | COQ10A    | 9.16E-05   | 1.997   |
| LOC283508         | 1.80E-05 | -1.6249  | ABCC4              | 0.00074788 | 1.94367 | LOC728568 | 1.87E-07   | 1.99706 |
| BTBD14B           | 1.79E-06 | -1.62453 | ARRB1              | 8.80E-07   | 1.94557 | LOC388588 | 1.47E-06   | 1.99739 |
| ---               | 8.13E-06 | -1.62439 | C12orf5            | 1.65E-05   | 1.9468  | SSH1      | 2.16E-05   | 1.99751 |
| SLITRK4           | 0.00309  | -1.62433 | ISYNA1             | 2.36E-07   | 1.94902 | MFAP3L    | 0.00298162 | 1.99882 |
| POLR2K            | 1.06E-05 | -1.62428 | AM84A /// LOC65360 | 4.39E-07   | 1.94904 | TMEM37    | 3.14E-05   | 1.99891 |
| DPY19L4           | 0.00016  | -1.62425 | KDEL3              | 1.61E-07   | 1.95003 | PVRL2     | 4.80E-08   | 2.00229 |
| ASCL1             | 7.89E-06 | -1.62414 | LOC374443          | 5.86E-06   | 1.95093 | SSBP2     | 8.71E-07   | 2.00279 |
| ---               | 0.00059  | -1.62409 | TDRD7              | 2.04E-08   | 1.95213 | HCCS      | 1.88E-05   | 2.0034  |
| FUS               | 1.36E-05 | -1.62401 | SLC39A14           | 2.91E-07   | 1.95242 | STARD5    | 3.52E-05   | 2.00445 |
| HMGB1             | 1.91E-05 | -1.62396 | PPAP2B             | 0.00012892 | 1.95282 | N4BP2L2   | 0.00164817 | 2.0049  |
| TMEM79            | 0.00439  | -1.62355 | SERHL /// SERHL2   | 0.00107431 | 1.95651 | C22orf16  | 1.80E-07   | 2.0077  |
| OTUB2             | 3.05E-05 | -1.62354 | RAB26              | 3.04E-06   | 1.95752 | SALL4     | 9.53E-06   | 2.00809 |
| SEMA3C            | 5.70E-05 | -1.62341 | ---                | 1.21E-07   | 1.95776 | GNB5      | 4.31E-07   | 2.01039 |
| MYCN              | 0.00105  | -1.6232  | HS6ST2             | 0.0140705  | 1.96104 | GPX3      | 1.07E-07   | 2.01057 |
| WDR90             | 2.76E-05 | -1.62309 | TMEM55A            | 0.0002818  | 1.96425 | CAMK2N1   | 1.69E-06   | 2.01105 |
| MLH1              | 3.01E-07 | -1.62281 | TRIM69             | 4.32E-05   | 1.96438 | CLU       | 4.04E-08   | 2.01858 |
| PRRT1             | 0.03309  | -1.6224  | FAM107B            | 2.18E-06   | 1.96567 | SPATA18   | 9.72E-05   | 2.01969 |
| SMC2              | 6.41E-05 | -1.62198 | TTC12              | 4.84E-05   | 1.96594 | CLPB      | 0.00374508 | 2.02331 |
| RABL3             | 0.00011  | -1.62137 | TMEM62             | 2.40E-06   | 1.96756 | ---       | 5.83E-06   | 2.02555 |
| TMEM97            | 0.00022  | -1.62112 | ---                | 6.96E-07   | 1.96802 | CAB39L    | 3.52E-07   | 2.02617 |
| GRK6              | 0.0001   | -1.62083 | RAB26              | 3.37E-07   | 1.96828 | FAM46A    | 5.77E-08   | 2.02656 |
| VAV3              | 0.00073  | -1.62045 | SLIT2              | 0.0112368  | 1.96852 | IGFBP5    | 9.86E-08   | 2.02708 |
| LYK5              | 4.07E-06 | -1.62017 | TNFAIP3            | 7.05E-05   | 1.96855 | LAMB1     | 3.25E-05   | 2.02925 |
| MLF1              | 0.00157  | -1.61951 | ---                | 2.36E-06   | 1.96927 | IGFBP3    | 6.15E-06   | 2.03017 |
| EME1              | 4.50E-06 | -1.61942 | RTCD1              | 1.16E-06   | 1.97017 | TMEM135   | 1.18E-06   | 2.03541 |
| C8orf32           | 1.31E-08 | -1.61859 | CROT               | 0.00495854 | 1.97415 | FBXO2     | 1.78E-06   | 2.03593 |
| C21orf57          | 0.00016  | -1.61857 | SLC39A11           | 3.69E-06   | 1.9747  | SLC12A2   | 1.31E-07   | 2.03692 |
| LOC285550         | 0.00481  | -1.61804 | ACSL1              | 1.08E-05   | 1.97549 | KITLG     | 3.90E-05   | 2.03698 |
| C1orf96           | 0.00652  | -1.61753 | NAT1               | 1.02E-06   | 1.97583 | CHST12    | 4.07E-07   | 2.03748 |
| EIF2C2            | 2.32E-07 | -1.61745 | SSBP2              | 1.01E-06   | 1.97624 | BAD       | 7.88E-06   | 2.03994 |
| TAF1B             | 0.00864  | -1.61743 | MAP3K12            | 3.87E-05   | 1.97854 | BTG2      | 0.00023528 | 2.04076 |
| DYNC2LI1          | 0.0002   | -1.61727 | SMAD9              | 6.72E-05   | 1.98024 | RGS16     | 8.79E-06   | 2.04109 |
| ---               | 0.0026   | -1.61615 | SLC29A3            | 0.00289492 | 1.98728 | WWOX      | 2.79E-05   | 2.04536 |
| FAM102A           | 4.34E-06 | -1.61567 | LMTK3              | 0.00393853 | 1.98729 | TGFBI     | 0.00363964 | 2.04601 |
| VPS37B            | 0.0002   | -1.61498 | GRB14              | 7.81E-06   | 1.98921 | LEPRE1    | 3.45E-05   | 2.04724 |
| ACSS3             | 3.59E-05 | -1.61495 | ANKRD6             | 4.26E-05   | 1.98962 | TIMP3     | 0.00017211 | 2.04948 |
| GUSBP1            | 1.24E-07 | -1.6144  | RAPH1              | 1.15E-05   | 1.99083 | HEXIM1    | 2.08E-07   | 2.05112 |
| SLC12A9           | 0.00025  | -1.61439 | PRSS22             | 1.55E-07   | 1.9921  | ---       | 5.95E-06   | 2.05189 |
| ---               | 0.00898  | -1.61433 | HES1               | 7.23E-06   | 1.9932  | TRAK1     | 0.00296598 | 2.05421 |
| POLR3GL           | 1.20E-06 | -1.61389 | WWOX               | 3.60E-05   | 1.99582 | RP2       | 4.24E-05   | 2.05666 |
| ---               | 9.95E-05 | -1.61375 | SCML1              | 7.09E-06   | 1.99719 | PRIC285   | 3.76E-07   | 2.05719 |
| ---               | 0.00164  | -1.61357 | ERAP1              | 9.32E-06   | 1.99787 | STAT1     | 4.51E-09   | 2.06144 |
| ---               | 0.00112  | -1.61354 | MT1F               | 0.00013681 | 1.99976 | CAB39L    | 0.00041254 | 2.06158 |
| DLX4              | 0.00115  | -1.61321 | DHRS2              | 1.19E-06   | 2.00148 | LY6D      | 0.00076082 | 2.06163 |

|                     |          |          |                       |            |         |              |            |         |
|---------------------|----------|----------|-----------------------|------------|---------|--------------|------------|---------|
| ---                 | 1.24E-05 | -1.61312 | HCCS                  | 1.90E-05   | 2.00167 | RELL1        | 6.17E-07   | 2.06429 |
| ---                 | 0.00089  | -1.61301 | FGFR1OP2              | 6.42E-06   | 2.00196 | HES1         | 4.90E-06   | 2.0675  |
| 33163 /// LOC644079 | 8.33E-05 | -1.61268 | DNAJC12               | 9.57E-09   | 2.00214 | SAMD9        | 0.0004114  | 2.06919 |
| NAB1                | 0.00455  | -1.61235 | TWF1                  | 0.0225762  | 2.00256 | ONECUT2      | 0.00117368 | 2.06935 |
| ETNK1               | 8.73E-05 | -1.61179 | EGFL7                 | 3.92E-05   | 2.00344 | DDX60L       | 0.00847201 | 2.06952 |
| COL1A1              | 0.00074  | -1.61169 | ---                   | 6.51E-06   | 2.00473 | PVRL2        | 5.03E-05   | 2.07072 |
| ARF3                | 3.62E-06 | -1.61164 | RNF213                | 0.00022504 | 2.00628 | SP100        | 2.33E-06   | 2.0716  |
| RABL5               | 3.38E-05 | -1.61163 | MRPS15                | 0.00298078 | 2.00723 | PRSS22       | 9.94E-08   | 2.07401 |
| DDX46               | 0.00013  | -1.61152 | EPOR                  | 0.00025225 | 2.00835 | STAT1        | 1.09E-07   | 2.07438 |
| ---                 | 0.00568  | -1.61143 | PKIA                  | 4.17E-08   | 2.00933 | MCART1       | 0.0006785  | 2.07925 |
| FBXO45              | 0.00608  | -1.61122 | MLLT11                | 5.24E-05   | 2.01085 | N6AMT1       | 0.00096079 | 2.08076 |
| RPA3                | 2.99E-08 | -1.61112 | ---                   | 0.00032598 | 2.0129  | GNB5         | 6.99E-05   | 2.08248 |
| ---                 | 0.02174  | -1.61085 | PNPT1                 | 2.82E-07   | 2.01322 | CPD          | 0.00116872 | 2.08646 |
| ---                 | 0.0007   | -1.61076 | HES1                  | 6.14E-09   | 2.01427 | PCDH8        | 0.00762822 | 2.09005 |
| ---                 | 0.00015  | -1.61042 | SP3                   | 6.65E-09   | 2.01503 | SPATA17      | 1.01E-05   | 2.09065 |
| SP1                 | 5.55E-05 | -1.61018 | RGS16                 | 9.96E-06   | 2.01714 | TNFRSF18     | 0.00369558 | 2.09323 |
| AHSA2               | 0.00014  | -1.61    | DHRXS                 | 0.00034006 | 2.01996 | SGTB         | 0.00025268 | 2.09612 |
| ---                 | 4.84E-06 | -1.60975 | SNRPC                 | 6.83E-07   | 2.02219 | ANXA9        | 1.78E-07   | 2.09857 |
| HIP1                | 0.00212  | -1.60888 | BTN3A2 /// BTN3A3     | 7.72E-05   | 2.02542 | LOC100128718 | 0.00151229 | 2.09922 |
| COL1A1              | 7.51E-05 | -1.60864 | NKX3-1                | 6.34E-05   | 2.02635 | PHLDB2       | 4.81E-05   | 2.09983 |
| FUBP1               | 3.13E-05 | -1.60832 | SLC12A2               | 1.38E-07   | 2.02673 | SCML1        | 5.72E-08   | 2.10002 |
| ITGB4               | 0.00014  | -1.60828 | FKBP11                | 6.17E-09   | 2.02686 | COMMD10      | 2.14E-08   | 2.1006  |
| ---                 | 0.00284  | -1.60821 | WVOX                  | 2.11E-06   | 2.03069 | GALT         | 7.31E-06   | 2.10136 |
| DECR1               | 2.57E-07 | -1.60789 | SLC41A2               | 0.00015294 | 2.03235 | DNAJB6       | 9.94E-07   | 2.10164 |
| C11orf61            | 0.00125  | -1.60782 | P2RY2                 | 0.0001136  | 2.03645 | EGFL7        | 2.41E-05   | 2.1019  |
| NR2F2               | 0.00344  | -1.6077  | PLEKHH2               | 0.00196488 | 2.03654 | LOC727770    | 0.00047401 | 2.10481 |
| LRRC37A2            | 0.00104  | -1.60759 | ELOVL7                | 2.63E-07   | 2.03812 | WVOX         | 1.11E-05   | 2.10518 |
| MIB1                | 0.00052  | -1.60717 | ULBP2                 | 0.00299099 | 2.03981 | IER5         | 5.66E-08   | 2.11003 |
| ---                 | 1.03E-07 | -1.60687 | LOC728568             | 1.46E-07   | 2.04244 | PRIC285      | 0.00022154 | 2.11282 |
| NSMCE4A             | 5.68E-07 | -1.60683 | BCAR3                 | 8.65E-05   | 2.04525 | PLAC8        | 0.00028079 | 2.11676 |
| CAPN9               | 0.00393  | -1.60672 | IER5                  | 7.72E-08   | 2.04987 | LOC147650    | 1.13E-06   | 2.11676 |
| ---                 | 9.56E-05 | -1.60651 | KITLG                 | 3.66E-05   | 2.04998 | FLJ40142     | 1.41E-05   | 2.11823 |
| TTL3                | 6.89E-05 | -1.60628 | FAM55C                | 0.00049812 | 2.05124 | RGS16        | 0.0003963  | 2.12686 |
| ---                 | 0.00024  | -1.60619 | LOC100131062 /// PTP4 | 0.00369364 | 2.05456 | ELF5         | 0.00015507 | 2.12906 |
| AKT2                | 7.56E-05 | -1.6059  | ARL4C                 | 0.00043496 | 2.05471 | KIF13B       | 0.00018976 | 2.12907 |
| LOC652755 /// NAIP  | 2.25E-05 | -1.60584 | PIGL                  | 0.00019114 | 2.05591 | MRPS15       | 0.00183984 | 2.13074 |
| NUP210              | 4.09E-05 | -1.60561 | IL15RA                | 0.00036789 | 2.05594 | TLE2         | 5.35E-07   | 2.13258 |
| USP22               | 0.00055  | -1.60505 | SAMD11                | 4.32E-05   | 2.05749 | BCAR3        | 5.76E-05   | 2.13332 |
| DUT                 | 6.33E-07 | -1.60499 | HLA-B                 | 2.84E-07   | 2.05807 | FLJ38379     | 0.00626794 | 2.136   |
| DLG1                | 0.00054  | -1.60491 | UBE2W                 | 2.25E-06   | 2.05868 | CPD          | 0.00068555 | 2.13637 |
| ---                 | 0.00187  | -1.6045  | GNB5                  | 3.29E-07   | 2.06098 | GUCY1B3      | 0.00719584 | 2.13967 |
| NIPBL               | 1.44E-06 | -1.60434 | COMMD10               | 2.58E-08   | 2.06453 | DDX58        | 4.68E-10   | 2.14131 |
| CKS1B               | 1.47E-06 | -1.60388 | RAPH1                 | 1.91E-09   | 2.06915 | LGALS3BP     | 1.20E-08   | 2.14147 |
| DDAH1               | 4.04E-07 | -1.6037  | ASNS                  | 1.22E-07   | 2.06968 | CAMK2N1      | 3.92E-06   | 2.1459  |
| OCC-1               | 0.00024  | -1.6035  | KLHL2                 | 1.01E-05   | 2.07447 | ---          | 0.00059782 | 2.14655 |
| ---                 | 0.01357  | -1.60317 | BAD                   | 2.39E-05   | 2.07537 | ULBP2        | 0.00198496 | 2.1482  |
| MINK1               | 3.30E-05 | -1.60299 | FAM84A                | 2.37E-05   | 2.07747 | LHPP         | 0.00021729 | 2.14826 |
| NUCKS1              | 3.57E-06 | -1.6027  | UBR1                  | 0.00025079 | 2.079   | SLC35C1      | 0.00018407 | 2.1493  |
| ---                 | 0.00018  | -1.60245 | KCNJ3                 | 0.00107253 | 2.08    | SLC41A2      | 8.81E-05   | 2.15445 |

|           |          |          |                  |            |         |           |            |         |
|-----------|----------|----------|------------------|------------|---------|-----------|------------|---------|
| ATP2A3    | 0.00104  | -1.60243 | RP2              | 3.79E-05   | 2.0802  | MYCBP2    | 2.97E-07   | 2.15449 |
| POLD2     | 6.26E-07 | -1.60219 | BAT2D1           | 2.16E-05   | 2.08068 | LXN       | 2.58E-10   | 2.15492 |
| RAF1      | 0.00079  | -1.6021  | IFIH1            | 0.0114401  | 2.08234 | ---       | 1.64E-06   | 2.16388 |
| ---       | 0.00064  | -1.60185 | DSCR8            | 3.65E-06   | 2.08491 | EMR1      | 0.00025941 | 2.16775 |
| C2CD2     | 1.23E-05 | -1.60094 | SERHL /// SERHL2 | 0.00170809 | 2.08533 | BAG2      | 6.37E-06   | 2.17381 |
| LANCL1    | 9.55E-06 | -1.60035 | BTG2             | 1.06E-09   | 2.08602 | KIF5C     | 7.94E-07   | 2.17429 |
| ZNF789    | 0.00157  | -1.59964 | GSTM3            | 1.02E-09   | 2.08729 | P2RY6     | 4.12E-08   | 2.17513 |
| ZMYM1     | 8.30E-05 | -1.59963 | NCOA7            | 2.50E-07   | 2.0911  | COMMD10   | 2.52E-06   | 2.17766 |
| PPP2R2C   | 0.01873  | -1.59951 | ZNFX1            | 1.40E-08   | 2.09114 | ---       | 1.54E-06   | 2.18267 |
| MZF1      | 2.83E-05 | -1.59925 | ---              | 4.67E-05   | 2.09465 | RAB39B    | 2.85E-05   | 2.18513 |
| ---       | 0.00116  | -1.59924 | KITLG            | 1.20E-05   | 2.09908 | RPS27L    | 3.11E-06   | 2.19014 |
| VPS45     | 2.16E-07 | -1.59821 | MCART1           | 0.00062219 | 2.09996 | JHDM1D    | 9.59E-05   | 2.19178 |
| C9orf140  | 2.84E-07 | -1.59818 | PML              | 1.73E-06   | 2.10229 | ---       | 6.85E-08   | 2.19327 |
| WDHD1     | 0.00081  | -1.59798 | LXN              | 3.32E-10   | 2.104   | CPEB2     | 2.70E-07   | 2.196   |
| TDG       | 0.00027  | -1.59779 | FAM46A           | 7.40E-07   | 2.10537 | ---       | 5.80E-06   | 2.19687 |
| ---       | 0.00733  | -1.59767 | LMF1             | 0.00059196 | 2.10876 | ACSL1     | 3.62E-06   | 2.19816 |
| NSMCE4A   | 4.91E-07 | -1.59749 | TAP2             | 0.00406143 | 2.1105  | LOC653602 | 0.00034626 | 2.19922 |
| HNRNPU    | 0.00764  | -1.59742 | ACADSB           | 0.00030419 | 2.11142 | RDX       | 3.25E-10   | 2.19934 |
| PRPF4B    | 0.0001   | -1.59722 | SLC6A8           | 0.00501591 | 2.11311 | SP110     | 8.35E-06   | 2.19995 |
| ---       | 0.00011  | -1.59715 | F2RL1            | 0.00012757 | 2.11558 | MTL5      | 7.64E-05   | 2.20038 |
| LOC643641 | 0.00143  | -1.59712 | PPM1K            | 3.84E-07   | 2.11666 | PSMB9     | 4.23E-05   | 2.20124 |
| ATP2B4    | 0.00372  | -1.5969  | AIFM2            | 0.00017874 | 2.11812 | RAB27B    | 2.18E-08   | 2.20261 |
| C10orf57  | 0.00179  | -1.59669 | SGSH             | 0.0052019  | 2.11941 | MUCL1     | 2.88E-07   | 2.2032  |
| ---       | 0.00055  | -1.59631 | RDH11            | 6.06E-09   | 2.12016 | IKIP      | 3.17E-05   | 2.20413 |
| WDR79     | 1.86E-05 | -1.59631 | SALL4            | 5.43E-06   | 2.12036 | BCAP29    | 3.24E-10   | 2.21167 |
| NMT1      | 0.00725  | -1.59624 | CTSC             | 0.00024591 | 2.12125 | ACADSB    | 0.00020178 | 2.21241 |
| ---       | 0.00032  | -1.59617 | RFTN1            | 2.17E-06   | 2.1285  | USP35     | 9.13E-07   | 2.21554 |
| FBXO9     | 0.00096  | -1.59609 | LPGAT1           | 4.52E-08   | 2.12906 | SLC39A11  | 1.12E-06   | 2.21564 |
| DDX23     | 1.07E-06 | -1.59572 | KIAA1377         | 0.00139167 | 2.1292  | GSTM3     | 5.50E-10   | 2.21596 |
| PPP2R2C   | 0.00016  | -1.59523 | CLEC7A           | 0.0010064  | 2.13186 | LMTK3     | 0.0016532  | 2.2195  |
| TRIM13    | 0.00775  | -1.59509 | ONECUT2          | 0.00091281 | 2.13201 | MAP3K12   | 1.23E-05   | 2.22105 |
| MBD4      | 0.004    | -1.59507 | LHX2             | 0.00023573 | 2.13231 | ---       | 1.45E-05   | 2.22315 |
| LPHN1     | 0.0002   | -1.59485 | TRIM21           | 2.73E-07   | 2.13251 | SEC14L1   | 7.06E-05   | 2.22481 |
| DEK       | 2.35E-06 | -1.59475 | CCDC126          | 5.78E-06   | 2.1326  | BEX5      | 1.98E-05   | 2.22898 |
| NES       | 0.00051  | -1.59444 | PNPLA6           | 0.00229559 | 2.13535 | ---       | 0.00103792 | 2.23417 |
| ---       | 0.00022  | -1.59431 | PCTP             | 2.68E-08   | 2.13788 | ADFP      | 6.38E-06   | 2.23617 |
| HNRNPC    | 1.52E-05 | -1.59409 | ---              | 9.37E-05   | 2.13874 | FAM84A    | 4.68E-07   | 2.23632 |
| ---       | 3.14E-05 | -1.59391 | EIF2AK2          | 1.15E-07   | 2.13931 | GOLM1     | 0.00022967 | 2.23649 |
| MYST4     | 3.86E-05 | -1.59368 | COMT             | 2.36E-08   | 2.15372 | ---       | 8.42E-05   | 2.2366  |
| ---       | 3.76E-05 | -1.59358 | ---              | 8.53E-06   | 2.15675 | EPB41L5   | 0.0001859  | 2.23861 |
| ATP6V0A1  | 3.06E-05 | -1.5932  | STAT1            | 9.42E-08   | 2.15816 | IFI27     | 8.07E-08   | 2.24415 |
| PRKDC     | 0.00081  | -1.5929  | RP1-93P18.1      | 1.67E-06   | 2.1621  | TRAK1     | 2.43E-05   | 2.24421 |
| GPR153    | 0.00053  | -1.59249 | ELF5             | 8.95E-05   | 2.16236 | PKIG      | 0.00012175 | 2.25146 |
| ---       | 0.00359  | -1.59242 | PPAP2B           | 0.00120771 | 2.16254 | GDPD1     | 2.55E-07   | 2.25396 |
| H2AFV     | 0.00031  | -1.59234 | MT1F             | 1.58E-05   | 2.16458 | STAT1     | 6.42E-09   | 2.25579 |
| NGEF      | 0.00178  | -1.59231 | STAT1            | 1.22E-08   | 2.1646  | ITPR1     | 0.0206467  | 2.25764 |
| FBXL17    | 0.02914  | -1.5923  | TMTC3            | 3.07E-05   | 2.16617 | RDX       | 6.86E-07   | 2.25912 |
| RAB36     | 0.00641  | -1.59202 | IGFBP5           | 0.00029636 | 2.16774 | FAM46A    | 3.58E-07   | 2.26569 |
| SFI1      | 8.65E-05 | -1.59151 | LAP3             | 6.56E-07   | 2.16991 | IGFBP5    | 1.66E-07   | 2.26762 |

|                     |          |          |                  |            |         |                |            |         |
|---------------------|----------|----------|------------------|------------|---------|----------------|------------|---------|
| LOC283267           | 0.00082  | -1.59137 | LRP12            | 0.0153508  | 2.17043 | LACTB          | 0.00017349 | 2.26881 |
| ---                 | 0.00369  | -1.59134 | ---              | 2.85E-07   | 2.17231 | CA4            | 3.82E-06   | 2.2694  |
| HCRP1               | 1.18E-06 | -1.59134 | SPATA7           | 1.14E-06   | 2.177   | PARP12         | 6.60E-06   | 2.27248 |
| STK35               | 4.50E-05 | -1.59124 | HEY1             | 1.01E-05   | 2.17924 | BEX4           | 2.16E-05   | 2.27255 |
| HP1BP3              | 2.75E-07 | -1.5912  | CA4              | 5.47E-06   | 2.18467 | AGA            | 1.84E-05   | 2.28189 |
| PPOX                | 0.00626  | -1.59111 | MYCBP2           | 2.52E-07   | 2.19035 | STEAP3         | 0.00018393 | 2.28576 |
| C20orf74            | 0.01813  | -1.59109 | COMMD10          | 2.38E-06   | 2.19082 | TMEM37         | 4.11E-05   | 2.28891 |
| PDE6D               | 1.46E-05 | -1.59096 | USP35            | 9.97E-07   | 2.19561 | FBXO6          | 9.42E-05   | 2.29252 |
| ---                 | 0.02121  | -1.59094 | COLEC12          | 3.42E-06   | 2.19788 | KITLG          | 5.14E-06   | 2.29453 |
| TAF1B               | 2.34E-05 | -1.59087 | MSI2             | 3.26E-05   | 2.19981 | PTPRE          | 5.89E-05   | 2.30503 |
| ---                 | 0.0001   | -1.59082 | BAD              | 3.64E-06   | 2.20307 | FRMD3          | 0.00025156 | 2.30547 |
| ZNF430              | 0.00025  | -1.59056 | ---              | 1.57E-05   | 2.20349 | TRIM14         | 5.89E-05   | 2.30793 |
| TRIM59              | 1.37E-08 | -1.59049 | C22orf16         | 6.74E-08   | 2.20382 | ANXA9          | 2.58E-07   | 2.30934 |
| ---                 | 0.00012  | -1.59009 | ERAP1            | 0.00106946 | 2.20787 | LIN7A          | 5.07E-06   | 2.31203 |
| TGFB1               | 5.80E-06 | -1.58987 | ZC3HAV1          | 1.20E-06   | 2.20837 | VLDLR          | 1.19E-06   | 2.32141 |
| FAM33A              | 1.57E-05 | -1.58971 | KIAA0888         | 8.84E-05   | 2.2099  | WIPI1          | 8.40E-06   | 2.32677 |
| MAP4                | 2.22E-05 | -1.58955 | LOC440957        | 9.76E-06   | 2.21092 | PARP14         | 1.86E-09   | 2.32734 |
| C20orf72            | 2.15E-05 | -1.58953 | SGTB             | 0.00015656 | 2.21176 | PSTPIP2        | 0.00020164 | 2.32838 |
| C14orf93            | 0.0058   | -1.5895  | BCAP29           | 3.23E-10   | 2.21205 | TNFRSF10A      | 0.0008385  | 2.33106 |
| CREBZF              | 7.53E-08 | -1.5891  | TMTC3            | 1.48E-06   | 2.21748 | SPATA7         | 2.17E-08   | 2.33149 |
| ---                 | 3.22E-05 | -1.58905 | SFXN1            | 6.98E-06   | 2.22105 | SLC17A5        | 4.94E-06   | 2.3328  |
| PTPRA               | 0.00294  | -1.589   | RDX              | 1.14E-05   | 2.22108 | C5orf41        | 2.32E-05   | 2.33557 |
| SPTLC2              | 5.39E-05 | -1.5888  | ISG15            | 2.91E-07   | 2.22309 | HERC6          | 5.13E-08   | 2.34157 |
| CDKN2AIPNL          | 0.00032  | -1.58854 | PHLDB2           | 2.80E-05   | 2.22494 | SLC35C1        | 1.73E-07   | 2.34292 |
| PAQR4               | 7.36E-05 | -1.58808 | PCDH19           | 3.40E-08   | 2.22776 | ICAM1          | 3.56E-05   | 2.34321 |
| /// NBPF15 /// NBPF | 0.00117  | -1.58773 | GNB5             | 3.72E-05   | 2.2279  | HSH2D          | 8.15E-06   | 2.34362 |
| ---                 | 0.00084  | -1.58749 | PCYT1A           | 0.00164292 | 2.23057 | ---            | 0.00015045 | 2.34395 |
| ---                 | 0.00011  | -1.58702 | SEC14L1          | 6.82E-05   | 2.23344 | DHRS2          | 2.19E-08   | 2.34637 |
| ---                 | 0.01097  | -1.58684 | PSAT1            | 5.15E-05   | 2.23456 | PLEKHH2        | 0.00063198 | 2.34838 |
| AMH                 | 2.16E-06 | -1.58663 | LPIN1            | 2.20E-06   | 2.24034 | ZMAT3          | 5.78E-06   | 2.35114 |
| STAMPB              | 0.00159  | -1.58657 | CLPB             | 0.00168359 | 2.24424 | ---            | 0.00012198 | 2.35375 |
| HMG2L1              | 7.22E-06 | -1.58649 | IFI6             | 1.74E-06   | 2.24466 | EPHX1          | 1.73E-08   | 2.35409 |
| ---                 | 0.00614  | -1.58645 | LIN7B            | 0.00026655 | 2.24469 | SLC17A5        | 2.52E-06   | 2.35625 |
| ---                 | 1.22E-05 | -1.58616 | ABHD7            | 0.00023896 | 2.25443 | C5orf41        | 0.00034345 | 2.36063 |
| C1orf176            | 0.00937  | -1.58593 | PKIG             | 0.00011992 | 2.25543 | BAG1           | 2.13E-05   | 2.36337 |
| LUZP6 /// MTPN      | 1.69E-06 | -1.5859  | LACTB            | 0.00018109 | 2.25728 | CREB3L1        | 3.80E-06   | 2.36468 |
| STK36               | 0.00066  | -1.5858  | ---              | 8.92E-08   | 2.25943 | GNE            | 0.00014129 | 2.3706  |
| C100130123 /// NUCB | 0.00015  | -1.58543 | MAN1A1           | 8.18E-06   | 2.26129 | ISYNA1         | 3.12E-08   | 2.37296 |
| BTF3L4              | 0.03394  | -1.58526 | ---              | 0.00108873 | 2.26169 | MAP4K2         | 0.00406807 | 2.37679 |
| ZNF700              | 6.38E-06 | -1.58517 | BAG2             | 4.35E-06   | 2.26347 | FAM43A         | 2.51E-05   | 2.37694 |
| MCM9                | 0.00018  | -1.58491 | DUSP10           | 6.12E-08   | 2.26517 | ---            | 3.68E-05   | 2.3791  |
| ---                 | 0.00048  | -1.58467 | LOC441108        | 0.00367777 | 2.27444 | GABBR1 /// UBD | 9.39E-06   | 2.3887  |
| NUP43               | 0.00061  | -1.58458 | GPX3             | 5.23E-08   | 2.27538 | HMCN1          | 1.13E-06   | 2.39691 |
| ---                 | 0.00065  | -1.58447 | RGS16            | 0.00021923 | 2.28008 | KDEL3          | 0.00072615 | 2.39825 |
| ---                 | 0.00143  | -1.58432 | RDH11            | 5.15E-08   | 2.28459 | PNPLA6         | 0.00096291 | 2.39894 |
| RRM2                | 2.50E-08 | -1.58432 | QPCT             | 0.00021978 | 2.28903 | PARP9          | 2.95E-06   | 2.39945 |
| PCDH10              | 6.25E-07 | -1.58418 | LMO4             | 4.05E-05   | 2.29158 | SEPP1          | 1.05E-06   | 2.39999 |
| RAD1                | 0.00092  | -1.58418 | MYO18A /// TIAF1 | 0.00036474 | 2.294   | COMT           | 8.22E-09   | 2.40322 |
| HSPD1               | 4.74E-08 | -1.58352 | GPX3             | 2.73E-08   | 2.29523 | P2RX4          | 1.44E-09   | 2.40338 |



|              |          |          |                  |            |         |                    |            |         |
|--------------|----------|----------|------------------|------------|---------|--------------------|------------|---------|
| SH3YL1       | 5.43E-07 | -1.58308 | IRF7             | 5.07E-08   | 2.29714 | RAPH1              | 1.86E-06   | 2.40344 |
| HECTD2       | 0.00014  | -1.58307 | P2RX4            | 2.18E-09   | 2.29803 | DHRS2              | 1.93E-07   | 2.40694 |
| ---          | 1.77E-05 | -1.58298 | GUCY1B3          | 0.00444697 | 2.29811 | BTG2               | 2.58E-10   | 2.4077  |
| KAZALD1      | 0.00282  | -1.58289 | TRIM14           | 1.95E-07   | 2.30295 | ASB9               | 2.23E-07   | 2.4108  |
| RAB30        | 0.00023  | -1.58278 | SPAG1            | 4.32E-06   | 2.3032  | GLCE               | 1.44E-05   | 2.4128  |
| CCNY         | 4.04E-05 | -1.58253 | CCL5             | 0.00061344 | 2.30503 | SULT2B1            | 1.00E-05   | 2.41816 |
| BCL7C        | 1.05E-06 | -1.58245 | SLC7A11          | 2.62E-06   | 2.30554 | SLIT1              | 8.42E-06   | 2.42463 |
| MGC16121     | 3.79E-05 | -1.58244 | TBX3             | 1.83E-05   | 2.30764 | SLC29A3            | 0.00060684 | 2.42602 |
| EZH2         | 2.06E-05 | -1.5823  | ERO1LB           | 0.00269932 | 2.31384 | FAS                | 1.50E-06   | 2.42719 |
| C5orf28      | 0.00061  | -1.58206 | RND3             | 6.26E-07   | 2.31611 | TMTC3              | 6.47E-07   | 2.42758 |
| ANKRD32      | 1.00E-06 | -1.58185 | GADD45A          | 3.03E-08   | 2.31788 | KCNJ3              | 0.00027822 | 2.43409 |
| GUSBP1       | 9.52E-06 | -1.58175 | CAB39L           | 0.00014817 | 2.32027 | GNB5               | 1.36E-06   | 2.43465 |
| WIZ          | 3.52E-07 | -1.58174 | AGA              | 1.59E-05   | 2.32073 | TAP2               | 2.70E-05   | 2.43504 |
| ARMC10       | 0.00016  | -1.58168 | ITPR1            | 0.017659   | 2.32386 | RDX                | 4.92E-06   | 2.44122 |
| ---          | 4.08E-08 | -1.5815  | MX1              | 0.00071958 | 2.32483 | KAL1               | 6.20E-05   | 2.44343 |
| EXTL2        | 9.88E-05 | -1.58125 | CORO1A           | 3.17E-06   | 2.32801 | B3GNT5             | 4.16E-05   | 2.44405 |
| ---          | 0.00038  | -1.58108 | PSMB10           | 4.88E-08   | 2.32928 | IGFBP6             | 8.66E-07   | 2.44492 |
| RAP2C        | 2.02E-06 | -1.58103 | ARL5B            | 3.39E-06   | 2.34181 | DRAM               | 2.61E-09   | 2.44772 |
| WHSC1L1      | 0.00117  | -1.58103 | GLCE             | 1.85E-05   | 2.3422  | ---                | 0.00029986 | 2.44877 |
| KIAA1704     | 9.03E-05 | -1.58086 | HMHA1            | 1.11E-06   | 2.3437  | RAPH1              | 3.65E-10   | 2.44902 |
| PDS5B        | 9.14E-06 | -1.58077 | LRP12            | 3.16E-08   | 2.34622 | RP1-21O18.1        | 1.45E-07   | 2.45033 |
| TMEM54       | 5.90E-06 | -1.58077 | TMEM140          | 0.00050512 | 2.35047 | WVOX               | 3.42E-07   | 2.45276 |
| SNN          | 5.21E-08 | -1.58069 | PIR              | 2.09E-08   | 2.35149 | SEC24D             | 0.00028688 | 2.45595 |
| RDH13        | 0.00282  | -1.58035 | TGFB3            | 0.00071286 | 2.35622 | PARP10             | 6.98E-08   | 2.45763 |
| FAM91A1      | 1.49E-05 | -1.58028 | ARRB1            | 5.69E-05   | 2.35791 | C5orf41            | 0.00057347 | 2.45857 |
| ---          | 0.00034  | -1.58007 | LIN7A            | 4.20E-06   | 2.3618  | TLE2               | 8.23E-08   | 2.46515 |
| C10orf26     | 1.20E-07 | -1.57999 | ---              | 7.18E-06   | 2.36964 | MME                | 0.00570634 | 2.4691  |
| SNED1        | 0.00015  | -1.57994 | SCML1            | 1.62E-08   | 2.3891  | FAS                | 3.37E-06   | 2.47202 |
| CXXC5        | 2.21E-08 | -1.57957 | STON2            | 1.61E-06   | 2.38974 | RAB27B             | 8.03E-06   | 2.47308 |
| MDC1         | 0.00011  | -1.57954 | MAP4K2           | 0.00380406 | 2.40179 | P2RX2              | 7.88E-06   | 2.47635 |
| C1orf21      | 7.43E-05 | -1.57946 | IGFBP6           | 9.42E-07   | 2.42107 | GRB14              | 9.50E-07   | 2.47845 |
| CD302        | 0.00633  | -1.57919 | PLAC8            | 8.89E-05   | 2.42564 | STOM               | 2.35E-08   | 2.48406 |
| CENPH        | 2.32E-05 | -1.57909 | GNB5             | 1.40E-06   | 2.42629 | PRNP               | 5.99E-06   | 2.4919  |
| WDR5         | 1.56E-06 | -1.57886 | JHDM1D           | 3.98E-05   | 2.42966 | STOM               | 1.52E-09   | 2.49228 |
| TP53AP1      | 1.71E-05 | -1.5786  | EPB41L5          | 9.44E-05   | 2.4315  | RSAD2              | 3.10E-06   | 2.49244 |
| SHROOM3      | 1.46E-05 | -1.57858 | SLC16A3          | 5.28E-05   | 2.44008 | AQP3               | 1.20E-09   | 2.49874 |
| ---          | 0.00069  | -1.57829 | KAL1             | 6.13E-05   | 2.44678 | CLEC7A             | 1.35E-06   | 2.50763 |
| ---          | 0.00056  | -1.57793 | IFIH1            | 2.23E-05   | 2.45057 | MYO18A /// TIAF1   | 0.00018217 | 2.50969 |
| RBM17        | 2.10E-06 | -1.57789 | ICAM1            | 2.44E-05   | 2.45223 | ---                | 2.16E-07   | 2.52025 |
| DIDO1        | 7.43E-06 | -1.57771 | EPHA3            | 4.51E-05   | 2.45247 | LRP12              | 1.65E-08   | 2.52543 |
| ---          | 0.00026  | -1.57696 | SERHL /// SERHL2 | 0.00032727 | 2.45564 | TPK1               | 0.00048776 | 2.53007 |
| SEPHS1       | 9.28E-06 | -1.57684 | SP100            | 4.22E-07   | 2.45612 | ---                | 0.00042598 | 2.53334 |
| IFT81        | 0.00025  | -1.57661 | DRAM             | 2.48E-09   | 2.46111 | DUSP10             | 2.21E-08   | 2.53576 |
| LOC100144415 | 1.91E-05 | -1.57626 | SLC17A5          | 1.68E-06   | 2.46994 | DTX3L              | 4.76E-08   | 2.54415 |
| TP53I13      | 0.00027  | -1.57615 | ---              | 8.69E-07   | 2.47521 | AM84A /// LOC65360 | 3.16E-08   | 2.54582 |
| MYO5A        | 0.00023  | -1.5761  | P2RX2            | 7.88E-06   | 2.4762  | RP1-93P18.1        | 3.70E-07   | 2.55343 |
| VRK3         | 4.16E-06 | -1.57589 | PRNP             | 6.28E-06   | 2.47757 | DDIT3              | 0.00010088 | 2.55377 |
| VANGL1       | 2.93E-05 | -1.57486 | FAM43A           | 1.78E-05   | 2.47843 | SLC16A3            | 3.64E-05   | 2.55817 |
| PATZ1        | 1.42E-06 | -1.57484 | LPIN1            | 1.30E-07   | 2.4961  | TTC12              | 4.23E-06   | 2.56088 |

|          |          |          |                      |            |         |                 |            |         |
|----------|----------|----------|----------------------|------------|---------|-----------------|------------|---------|
| ARHGAP19 | 5.84E-06 | -1.57461 | KIAA1946             | 5.22E-07   | 2.49993 | EPHA3           | 3.19E-05   | 2.56276 |
| NOS1AP   | 0.01023  | -1.57441 | OXTR                 | 0.00080229 | 2.50166 | TMEM37          | 4.99E-05   | 2.56509 |
| ---      | 0.00082  | -1.57433 | ABCB9                | 2.67E-06   | 2.505   | DSCR8           | 5.30E-07   | 2.5743  |
| MPZL1    | 0.00026  | -1.57424 | IL28A                | 0.00030407 | 2.50965 | BCAP29          | 3.87E-07   | 2.57981 |
| CDK4     | 1.21E-07 | -1.57353 | /// TRIM6 /// TRIM6- | 0.00428854 | 2.50986 | GSTM4           | 5.07E-05   | 2.58125 |
| HMG2L1   | 7.07E-06 | -1.57344 | SLC6A8               | 7.98E-06   | 2.5128  | ---             | 1.67E-06   | 2.59418 |
| CROT     | 2.24E-05 | -1.57335 | APOD                 | 4.93E-07   | 2.52853 | RP1-21O18.1     | 2.47E-06   | 2.5998  |
| FLJ10246 | 0.00154  | -1.5733  | VEZT                 | 8.51E-06   | 2.52864 | ---             | 0.00031342 | 2.60639 |
| VAPB     | 0.00386  | -1.57307 | AOX1                 | 0.00146742 | 2.53331 | ARRB1           | 2.56E-05   | 2.60643 |
| ---      | 0.00472  | -1.57293 | SULT2B1              | 6.82E-06   | 2.53438 | STON2           | 0.00034209 | 2.60673 |
| NUP62    | 7.46E-06 | -1.5729  | DNASE1L2             | 9.91E-06   | 2.5426  | PCTP            | 4.28E-09   | 2.60781 |
| ZNF585A  | 9.70E-05 | -1.57204 | DDIT3                | 0.00010299 | 2.54674 | ---             | 0.00182198 | 2.60898 |
| WHSC1L1  | 4.21E-06 | -1.57144 | TNFRSF10A            | 0.00043847 | 2.54873 | GLUD1           | 5.02E-05   | 2.617   |
| DBF4B    | 0.00256  | -1.57143 | FAS                  | 0.00027793 | 2.55036 | RAB26           | 1.89E-07   | 2.61972 |
| ANKRD35  | 0.00018  | -1.57131 | COMT                 | 3.51E-08   | 2.55522 | PIB5PA          | 1.25E-05   | 2.62413 |
| ---      | 0.0236   | -1.57127 | PCDH20               | 2.37E-06   | 2.56504 | SLC6A8          | 0.00111658 | 2.63128 |
| ---      | 0.00998  | -1.57119 | RPS6KA2              | 0.00028636 | 2.57136 | FAM5C           | 0.00109149 | 2.63246 |
| PHKA2    | 0.00088  | -1.56996 | TIMP3                | 2.41E-05   | 2.57619 | SGSH            | 0.00117711 | 2.63683 |
| P15RS    | 1.00E-06 | -1.56968 | KIF5C                | 1.72E-07   | 2.57647 | SLC7A11         | 3.74E-05   | 2.64865 |
| ---      | 0.00095  | -1.56958 | ARHGAP18             | 4.75E-06   | 2.57683 | TP53INP2        | 2.43E-07   | 2.65435 |
| MYO5C    | 4.02E-07 | -1.56928 | CAB39L               | 3.84E-07   | 2.57818 | ABCC4           | 5.43E-05   | 2.65719 |
| TFAP2A   | 1.93E-05 | -1.56879 | SP100                | 6.24E-09   | 2.58286 | DUSP10          | 0.00010996 | 2.66674 |
| ---      | 0.00435  | -1.56844 | C10orf30             | 3.80E-05   | 2.58368 | KIAA1377        | 0.00060062 | 2.67319 |
| RBM47    | 5.65E-06 | -1.56835 | SEC24D               | 0.00019271 | 2.59291 | FAS             | 1.30E-05   | 2.67694 |
| ---      | 0.00162  | -1.56809 | RP1-21O18.1          | 8.97E-08   | 2.59325 | LRP12           | 0.00449148 | 2.68204 |
| SNX7     | 6.31E-07 | -1.56805 | RAB39B               | 6.49E-06   | 2.59776 | RAB26           | 1.77E-08   | 2.68259 |
| ---      | 2.95E-05 | -1.5679  | ABCG1                | 8.12E-06   | 2.59781 | LAMP3           | 0.00021007 | 2.69591 |
| TBC1D5   | 3.82E-07 | -1.56771 | TIMP3                | 0.00049226 | 2.60481 | UST             | 2.43E-05   | 2.69914 |
| ---      | 0.00045  | -1.56763 | TAP2                 | 1.44E-07   | 2.60485 | NOX5 /// SPESP1 | 1.10E-06   | 2.7052  |
| RAD21    | 1.99E-05 | -1.56732 | FAS                  | 2.17E-06   | 2.6092  | VEZT            | 4.86E-06   | 2.71702 |
| PPP2R5C  | 1.72E-05 | -1.56707 | FGF18                | 7.71E-05   | 2.61947 | ---             | 7.57E-06   | 2.71999 |
| ---      | 0.00018  | -1.56694 | ---                  | 1.61E-05   | 2.62346 | RUNDC3B         | 6.27E-06   | 2.7203  |
| ---      | 0.03939  | -1.56687 | CAB39L               | 3.04E-08   | 2.62719 | ---             | 7.05E-09   | 2.72448 |
| PHTF1    | 3.86E-05 | -1.56664 | RAB27B               | 4.94E-06   | 2.62737 | RND3            | 1.58E-07   | 2.72618 |
| ---      | 1.70E-06 | -1.56661 | XK                   | 0.00053296 | 2.62859 | COLEC12         | 5.19E-07   | 2.73802 |
| PFDN1    | 3.64E-09 | -1.56611 | KCNN4                | 8.38E-05   | 2.63043 | PCSK2           | 4.95E-07   | 2.74269 |
| LCN2     | 0.00029  | -1.56594 | TRIM14               | 2.06E-07   | 2.63055 | SPATA7          | 1.52E-07   | 2.74269 |
| ACOT4    | 2.01E-06 | -1.56594 | GSTM4                | 4.33E-05   | 2.63581 | PSMB8           | 0.00028372 | 2.75281 |
| C1orf135 | 0.00051  | -1.56584 | PLEKHH2              | 0.00238123 | 2.64779 | COMT            | 1.71E-08   | 2.79533 |
| FXR2     | 0.04294  | -1.56578 | DUSP10               | 0.00011484 | 2.65058 | RUNDC3B         | 4.29E-07   | 2.81533 |
| NICN1    | 0.00033  | -1.56568 | SLC17A5              | 1.66E-06   | 2.65881 | HERC5           | 7.03E-07   | 2.81563 |
| RSL1D1   | 0.00042  | -1.56563 | ADFP                 | 1.45E-06   | 2.65976 | LOC374443       | 0.00014063 | 2.81638 |
| TSEN54   | 0.00014  | -1.56562 | PRIC285              | 3.40E-08   | 2.66758 | FAM84A          | 1.74E-06   | 2.81735 |
| SIPA1L1  | 0.00123  | -1.56521 | SP110                | 1.77E-09   | 2.67046 | FLJ11286        | 6.79E-07   | 2.81854 |
| ---      | 0.0275   | -1.56521 | BEX5                 | 4.27E-06   | 2.67789 | HMHA1           | 2.42E-07   | 2.82141 |
| ARID2    | 1.21E-06 | -1.5652  | BCAP29               | 2.87E-07   | 2.67792 | ---             | 3.01E-07   | 2.82796 |
| PTAR1    | 1.22E-05 | -1.56519 | ST6GALNAC4           | 4.47E-06   | 2.68609 | ABCB9           | 1.03E-06   | 2.8293  |
| SPG7     | 3.91E-05 | -1.56516 | PRIC285              | 3.10E-05   | 2.68839 | DNAJC12         | 1.37E-09   | 2.832   |
| ---      | 0.0008   | -1.56501 | KDEL3                | 0.00032415 | 2.68976 | GBP3            | 0.0010834  | 2.83657 |

|                   |          |          |                   |            |         |                   |            |         |
|-------------------|----------|----------|-------------------|------------|---------|-------------------|------------|---------|
| HSD3B7            | 0.00049  | -1.56484 | ARHGAP18          | 1.71E-05   | 2.69287 | LOC286167         | 2.99E-05   | 2.8387  |
| ---               | 0.00033  | -1.56472 | LAMB1             | 1.46E-06   | 2.71606 | EIF4EBP1          | 3.31E-08   | 2.84092 |
| NET1              | 1.60E-07 | -1.56468 | AXIN2             | 0.0013729  | 2.71827 | GADD45A           | 5.46E-09   | 2.84255 |
| GUCY1B2           | 0.00019  | -1.56455 | EIF4EBP1          | 4.59E-08   | 2.72274 | MAP3K12           | 1.55E-06   | 2.8455  |
| SUSD2             | 0.00612  | -1.56435 | CDKN1A            | 5.53E-10   | 2.73084 | TGFB3             | 0.00018974 | 2.84696 |
| REEP4             | 2.88E-05 | -1.56378 | RP1-21O18.1       | 1.68E-06   | 2.73118 | PP9284 /// TMRSS2 | 2.29E-09   | 2.84707 |
| ASMTL             | 0.00046  | -1.56372 | PML               | 2.10E-06   | 2.74851 | PLEKHH2           | 0.00154825 | 2.84782 |
| DNMT1             | 7.83E-08 | -1.5637  | CCDC126           | 1.27E-05   | 2.75343 | FLJ11286          | 4.50E-06   | 2.85105 |
| ---               | 0.00016  | -1.56363 | IFIH1             | 3.95E-06   | 2.75434 | FLJ11286          | 1.59E-12   | 2.85671 |
| SGCB              | 0.0192   | -1.5636  | PML               | 1.60E-06   | 2.7551  | SLC6A8            | 2.96E-06   | 2.85981 |
| CTDSP2            | 1.99E-06 | -1.56357 | SP110             | 6.31E-10   | 2.76528 | ---               | 4.06E-05   | 2.86382 |
| C7orf23           | 2.33E-07 | -1.56349 | RAPH1             | 1.17E-08   | 2.78229 | ST6GALNAC4        | 1.44E-06   | 2.87006 |
| SNX2              | 1.52E-08 | -1.56348 | KCNJ3             | 0.00010591 | 2.78376 | DDX58             | 3.52E-11   | 2.87026 |
| ---               | 0.00391  | -1.56314 | ---               | 5.90E-09   | 2.78735 | PCDH7             | 0.0001624  | 2.88066 |
| C20orf94          | 3.34E-05 | -1.56307 | RUNDC3B           | 4.62E-07   | 2.78783 | CLEC7A            | 3.61E-07   | 2.88436 |
| ---               | 0.00165  | -1.56285 | PSCA              | 0.00197092 | 2.79231 | SOX9              | 4.67E-06   | 2.88823 |
| ---               | 0.0229   | -1.56244 | FAS               | 4.68E-07   | 2.8053  | SFXN5             | 1.99E-06   | 2.90188 |
| RSPH1             | 0.00105  | -1.56228 | PCDH7             | 0.00019038 | 2.81179 | OASL              | 4.81E-06   | 2.91252 |
| SLC39A10          | 1.81E-06 | -1.56219 | KIAA1377          | 0.00043126 | 2.8135  | IGFBP5            | 3.04E-05   | 2.91628 |
| ESR1              | 0.00316  | -1.562   | SFXN5             | 2.42E-06   | 2.82494 | MSI2              | 3.34E-06   | 2.91845 |
| C1orf210          | 0.00365  | -1.56199 | ANKRD6            | 2.38E-07   | 2.82608 | DNASE1L2          | 3.43E-06   | 2.9286  |
| ---               | 0.04061  | -1.56192 | SOX9              | 5.26E-06   | 2.84083 | SERHL /// SERHL2  | 4.36E-05   | 2.93772 |
| ---               | 8.65E-05 | -1.56185 | CLEC7A            | 5.02E-07   | 2.84586 | ARHGAP18          | 9.03E-06   | 2.94488 |
| KCNMB4            | 5.48E-05 | -1.5613  | ---               | 8.94E-06   | 2.84975 | IFIT5             | 5.88E-09   | 2.96286 |
| ---               | 6.00E-05 | -1.56125 | ---               | 0.00024636 | 2.85189 | SAMD9             | 7.83E-07   | 2.96783 |
| TMEM30A           | 7.62E-05 | -1.56084 | ---               | 1.26E-10   | 2.85296 | ACPL2             | 6.82E-07   | 2.97931 |
| RBM12B            | 0.00044  | -1.56066 | SLC1A1            | 4.29E-09   | 2.8592  | ---               | 2.98E-06   | 2.98084 |
| ---               | 0.00014  | -1.56064 | NMI               | 5.97E-09   | 2.8654  | FLJ22662          | 7.34E-06   | 2.98685 |
| USP1              | 5.29E-08 | -1.56063 | GABBR1 /// UBD    | 2.23E-06   | 2.86814 | USP18             | 1.93E-09   | 2.99504 |
| FKBP9             | 3.76E-06 | -1.55971 | DDIT4L            | 0.00023288 | 2.86824 | PARP9             | 7.18E-12   | 3.00925 |
| ARID2             | 0.0003   | -1.55926 | RUNDC3B           | 4.07E-06   | 2.88552 | BAK1              | 1.68E-05   | 3.01388 |
| SNF8              | 0.00015  | -1.55908 | P2RY6             | 3.53E-09   | 2.88945 | BST2              | 3.86E-06   | 3.01788 |
| TEX2              | 1.06E-05 | -1.55862 | MAP3K12           | 1.38E-06   | 2.89022 | VAMP5             | 2.98E-05   | 3.02339 |
| MYST4             | 5.85E-06 | -1.55854 | STAT1             | 5.62E-09   | 2.895   | RFTN1             | 1.13E-07   | 3.0266  |
| SESTD1            | 3.82E-05 | -1.55847 | TIMP3             | 0.00073577 | 2.89839 | ---               | 1.02E-06   | 3.0492  |
| DGKZ              | 6.75E-06 | -1.55838 | NOX5 /// SPESP1   | 6.51E-07   | 2.9007  | FAM107B           | 4.77E-10   | 3.05215 |
| SR140             | 1.51E-05 | -1.55837 | STAT1             | 1.37E-08   | 2.90995 | RAB39B            | 2.62E-06   | 3.08541 |
| SYK               | 0.01837  | -1.55794 | BAK1              | 2.10E-05   | 2.91419 | AOX1              | 0.00042774 | 3.09111 |
| CYFIP2            | 0.00035  | -1.55735 | LBA1              | 2.05E-08   | 2.92193 | ARHGAP18          | 1.14E-06   | 3.13298 |
| ---               | 0.0193   | -1.55731 | IFITM1            | 8.43E-11   | 2.92668 | IFIT2             | 8.81E-07   | 3.13334 |
| TUBD1             | 1.76E-07 | -1.55729 | PRIC285           | 0.00079071 | 2.93669 | CEACAM6           | 3.65E-08   | 3.13673 |
| ---               | 4.29E-05 | -1.55727 | ACADSB            | 4.79E-05   | 2.93998 | SMAD9             | 1.41E-06   | 3.15709 |
| NCOR2             | 1.25E-06 | -1.55701 | CAMK2N1           | 1.54E-05   | 2.94167 | ABCG1             | 1.98E-06   | 3.16063 |
| CTEX1D2 /// TM4SF | 2.30E-05 | -1.557   | HMCN1             | 2.19E-07   | 2.9462  | RAPH1             | 4.51E-09   | 3.17011 |
| ZNF219            | 0.00519  | -1.55694 | ---               | 2.05E-08   | 2.95128 | FAM107B           | 3.32E-08   | 3.1862  |
| ---               | 0.02599  | -1.5564  | RAB39B            | 3.38E-06   | 2.97246 | AXIN2             | 0.00053863 | 3.18809 |
| MIS12             | 9.58E-06 | -1.55615 | PLSCR1            | 7.39E-08   | 2.97339 | TIMP3             | 0.00012949 | 3.21099 |
| ZNF689            | 1.22E-05 | -1.55587 | PP9284 /// TMRSS2 | 1.64E-09   | 2.97945 | KIAA1946          | 7.92E-08   | 3.21304 |
| FLJ45482          | 3.00E-05 | -1.55575 | FAM13A1           | 4.73E-07   | 2.99322 | CSTA              | 2.20E-10   | 3.22743 |

|              |          |          |              |            |         |                  |            |         |
|--------------|----------|----------|--------------|------------|---------|------------------|------------|---------|
| CHD1L        | 0.00255  | -1.55569 | ---          | 9.60E-08   | 3.01223 | ANGPTL4          | 9.51E-08   | 3.23678 |
| ANP32B       | 1.17E-05 | -1.55563 | OAS3         | 3.54E-07   | 3.01307 | CAMK2N1          | 7.86E-06   | 3.25933 |
| PRKCI        | 3.11E-05 | -1.55559 | LOC286167    | 1.99E-05   | 3.01388 | DNAJC12          | 1.38E-10   | 3.26893 |
| VRK3         | 0.00548  | -1.55558 | ACPL2        | 6.29E-07   | 3.01397 | PCDH20           | 4.06E-07   | 3.27112 |
| COIL         | 3.86E-06 | -1.55531 | STOM         | 5.10E-09   | 3.01676 | GPX2             | 0.00174423 | 3.27351 |
| FAM111A      | 8.86E-07 | -1.55519 | CSTA         | 3.51E-10   | 3.01896 | IFIT5            | 8.88E-10   | 3.29124 |
| FNIP2        | 0.00756  | -1.55503 | FZD5         | 5.49E-06   | 3.02714 | FRMD3            | 0.00022604 | 3.30295 |
| ZNF548       | 0.00432  | -1.55468 | PARP10       | 3.26E-05   | 3.03323 | CDKN1A           | 1.30E-10   | 3.33744 |
| MGC27345     | 0.00282  | -1.55461 | STAT1        | 1.45E-10   | 3.04882 | TIMP3            | 0.00032336 | 3.34217 |
| ---          | 1.85E-05 | -1.55459 | UST          | 1.02E-05   | 3.05693 | CEACAM6          | 1.18E-07   | 3.34272 |
| FAM115A      | 0.0052   | -1.55449 | SP110        | 2.13E-08   | 3.05736 | FGF18            | 1.46E-05   | 3.36035 |
| CCNG1        | 2.18E-06 | -1.55437 | LOC100128718 | 9.99E-05   | 3.06481 | RSAD2            | 9.67E-06   | 3.36058 |
| ---          | 0.01827  | -1.55431 | CXCR4        | 1.94E-09   | 3.07431 | ACADSB           | 1.97E-05   | 3.38195 |
| ---          | 0.0016   | -1.55428 | FBXO6        | 1.05E-05   | 3.07536 | DDX60            | 1.39E-07   | 3.41495 |
| SHISA2       | 4.80E-05 | -1.5541  | CEACAM6      | 2.05E-07   | 3.07993 | FZD5             | 2.41E-06   | 3.43952 |
| ZNF567       | 0.00164  | -1.55396 | PP14571      | 8.27E-07   | 3.08121 | FAM83A           | 1.92E-07   | 3.44483 |
| PARP1        | 6.10E-07 | -1.55395 | ARNT2        | 8.96E-06   | 3.09048 | OAS1             | 6.63E-11   | 3.446   |
| BBS1         | 0.00248  | -1.55395 | SP110        | 4.36E-05   | 3.10078 | HHEX             | 1.93E-07   | 3.45038 |
| CEP152       | 0.0005   | -1.55392 | SUSD2        | 1.38E-05   | 3.11104 | OAS2             | 5.74E-05   | 3.45098 |
| ZNF443       | 4.69E-07 | -1.55372 | IFITM1       | 3.25E-08   | 3.11162 | ST3GAL1          | 3.06E-09   | 3.5387  |
| LOC100129461 | 0.00988  | -1.55347 | IL27RA       | 6.00E-05   | 3.11983 | RND1             | 7.72E-07   | 3.53888 |
| ---          | 0.0003   | -1.55332 | LOC374443    | 7.10E-05   | 3.13119 | ANGPTL4          | 4.43E-07   | 3.54888 |
| STARD5       | 0.0008   | -1.55313 | FGF18        | 9.99E-06   | 3.15143 | RPS6KA2          | 3.61E-05   | 3.55993 |
| LRRFIP1      | 0.00104  | -1.55297 | LAMB1        | 8.54E-07   | 3.15578 | CMPK2            | 1.77E-09   | 3.64627 |
| ZFP106       | 7.90E-06 | -1.55286 | VLDLR        | 1.06E-07   | 3.16066 | CXCR4            | 6.16E-10   | 3.65997 |
| LOC388969    | 2.97E-05 | -1.55279 | FLJ22662     | 4.84E-06   | 3.17887 | APOD             | 3.49E-08   | 3.67754 |
| ---          | 0.00239  | -1.55274 | PLSCR1       | 2.42E-10   | 3.20695 | KCNN4            | 9.57E-06   | 3.68193 |
| PPA2         | 0.00971  | -1.55267 | ---          | 7.20E-06   | 3.20741 | OAS1             | 6.92E-08   | 3.71559 |
| ---          | 0.00701  | -1.55241 | CEACAM6      | 3.12E-08   | 3.20915 | TBX3             | 5.82E-07   | 3.74036 |
| HEATR5A      | 0.00121  | -1.55229 | SLC1A1       | 1.28E-05   | 3.20978 | CLEC7A           | 1.86E-07   | 3.76233 |
| SNX24        | 2.39E-06 | -1.55184 | ---          | 8.48E-05   | 3.24483 | FAM13A1          | 1.03E-07   | 3.7922  |
| ---          | 0.01247  | -1.5518  | CXCR4        | 7.14E-08   | 3.26347 | SERHL /// SERHL2 | 2.01E-05   | 3.80185 |
| MUC1         | 2.22E-06 | -1.55175 | TRIM14       | 4.57E-06   | 3.26655 | PALM3            | 9.14E-05   | 3.82029 |
| PPIB         | 2.18E-06 | -1.55172 | STOM         | 1.80E-10   | 3.30198 | SUSD2            | 3.93E-06   | 3.82992 |
| C14orf167    | 0.0001   | -1.55109 | FGF18        | 5.94E-07   | 3.31867 | CXCR4            | 3.97E-09   | 3.8396  |
| AP3D1        | 6.22E-08 | -1.55094 | ABCG1        | 2.30E-08   | 3.32522 | OASL             | 3.43E-07   | 3.84926 |
| RAD51C       | 1.25E-07 | -1.55089 | LGALS3BP     | 3.20E-10   | 3.32864 | CXCR4            | 2.55E-08   | 3.85055 |
| MUCL1        | 2.47E-05 | -1.55087 | FAM5C        | 0.00026604 | 3.32905 | ST6GALNAC4       | 4.13E-07   | 3.85197 |
| ---          | 0.00315  | -1.55082 | CXCR4        | 9.56E-09   | 3.33297 | IFI44L           | 5.53E-09   | 3.85483 |
| HSPA14       | 2.40E-07 | -1.55042 | MMP16        | 0.00037957 | 3.33893 | FZD8             | 7.73E-08   | 3.88998 |
| PXMP4        | 0.00268  | -1.55003 | DDX58        | 1.19E-11   | 3.34452 | ELF5             | 1.35E-06   | 3.89351 |
| NFATC2IP     | 2.24E-05 | -1.54991 | ---          | 1.37E-06   | 3.35061 | PP14571          | 1.90E-07   | 3.89903 |
| NSBP1        | 0.00037  | -1.54963 | IRF1         | 7.02E-09   | 3.36248 | ABCG1            | 8.34E-09   | 3.92238 |
| ---          | 0.00243  | -1.54946 | FAS          | 2.69E-06   | 3.36726 | FAM134B          | 8.84E-10   | 3.9282  |
| WDR57        | 9.72E-07 | -1.54925 | IL15         | 2.57E-05   | 3.40393 | FGF18            | 2.05E-07   | 3.9587  |
| ARHGEF19     | 0.00049  | -1.54917 | S100A4       | 1.11E-05   | 3.41965 | LOC286167        | 1.93E-07   | 3.97342 |
| MPHOSPH1     | 0.00018  | -1.54916 | ---          | 1.59E-06   | 3.42066 | ARNT2            | 1.96E-06   | 3.97427 |
| KDEL2        | 1.98E-06 | -1.54878 | ---          | 5.49E-05   | 3.42623 | ERO1LB           | 8.83E-05   | 4.14357 |
| ---          | 5.98E-05 | -1.54831 | ANGPTL4      | 6.46E-08   | 3.435   | RARRES3          | 7.80E-09   | 4.16921 |

|                    |          |          |           |            |         |                  |            |         |
|--------------------|----------|----------|-----------|------------|---------|------------------|------------|---------|
| KLHDC3             | 1.01E-05 | -1.5482  | ---       | 0.00206013 | 3.45501 | FAM134B          | 1.18E-07   | 4.23057 |
| EXOSC2             | 0.0002   | -1.54796 | CLEC7A    | 1.01E-07   | 3.48344 | CCDC46           | 7.45E-07   | 4.24357 |
| STXBP4             | 0.00032  | -1.54779 | PALM3     | 0.00014998 | 3.48494 | FGF18            | 1.63E-06   | 4.30254 |
| ---                | 0.00123  | -1.54761 | STAT1     | 2.11E-10   | 3.49243 | SERHL /// SERHL2 | 1.59E-05   | 4.31351 |
| MED30              | 1.90E-05 | -1.54744 | SP110     | 2.43E-07   | 3.49849 | S100A4           | 3.01E-06   | 4.31899 |
| FARP1              | 0.0007   | -1.54743 | IFI35     | 4.30E-10   | 3.50454 | IFIT3            | 1.07E-07   | 4.39895 |
| ---                | 0.00715  | -1.54725 | SP100     | 3.21E-08   | 3.54319 | IFIT1            | 3.95E-11   | 4.55651 |
| ---                | 2.64E-06 | -1.54703 | CCDC83    | 2.97E-07   | 3.54894 | ---              | 0.00058117 | 4.57055 |
| ---                | 0.00785  | -1.54684 | IFIT2     | 3.27E-05   | 3.56422 | RPRM             | 4.85E-07   | 4.66489 |
| ---                | 1.18E-06 | -1.54663 | SAMHD1    | 3.97E-08   | 3.58959 | TMPRSS2          | 2.56E-06   | 4.74327 |
| SEPHS1             | 6.99E-06 | -1.54654 | ST3GAL1   | 2.71E-09   | 3.60715 | CTSH             | 2.61E-10   | 4.75196 |
| ANXA6              | 4.50E-06 | -1.5464  | STON2     | 4.47E-05   | 3.61081 | IFIT3            | 5.21E-08   | 4.8816  |
| TRIM66             | 0.01342  | -1.54638 | DTX3L     | 3.84E-09   | 3.61297 | TIMP3            | 9.89E-07   | 4.90128 |
| PGR                | 4.10E-05 | -1.54632 | OAS3      | 3.46E-10   | 3.6147  | ---              | 3.73E-08   | 4.96507 |
| GAS2L1             | 4.25E-05 | -1.54624 | PARP14    | 6.62E-11   | 3.61475 | MMP16            | 2.61E-06   | 5.05337 |
| TMF1               | 4.15E-05 | -1.54605 | RND1      | 6.63E-07   | 3.62969 | CORO2A           | 2.17E-09   | 5.08842 |
| C2orf56            | 0.00021  | -1.54582 | ANGPTL4   | 3.66E-07   | 3.66297 | OAS2             | 2.51E-06   | 5.10217 |
| ---                | 0.02405  | -1.54572 | EMR1      | 6.13E-06   | 3.68152 | FZD8             | 8.88E-11   | 5.10857 |
| ---                | 0.00212  | -1.54543 | CTSH      | 1.08E-09   | 3.68277 | CORO2A           | 8.81E-11   | 5.11639 |
| SLC30A7            | 0.00077  | -1.54531 | PARP9     | 1.35E-07   | 3.69042 | C8orf57          | 1.84E-07   | 5.14727 |
| MUT                | 1.59E-06 | -1.54522 | FZD8      | 0.00073417 | 3.73226 | FAM83A           | 3.92E-08   | 5.23471 |
| ---                | 0.00547  | -1.54509 | TAP1      | 7.99E-09   | 3.74197 | FAM105A          | 1.77E-07   | 5.28886 |
| C21orf58           | 0.00112  | -1.54505 | PARP12    | 1.60E-07   | 3.79097 | ---              | 8.63E-06   | 5.3321  |
| COIL               | 3.15E-07 | -1.54502 | OAS2      | 2.44E-05   | 3.7976  | IFI44            | 4.02E-08   | 5.36369 |
| LOC92482           | 3.47E-06 | -1.54497 | ---       | 7.02E-06   | 3.80148 | MMD              | 3.62E-11   | 5.46395 |
| MRPL42             | 0.00024  | -1.54492 | PARP10    | 2.94E-09   | 3.83338 | SLC41A2          | 9.44E-06   | 5.51318 |
| UBAP2L             | 3.75E-06 | -1.54443 | FAM83A    | 9.80E-08   | 3.84983 | SELM             | 5.40E-06   | 5.54219 |
| ---                | 0.00426  | -1.54441 | CCL5      | 3.21E-06   | 4.01173 | SCNN1A           | 7.69E-07   | 5.59854 |
| DKFZP434I0714      | 1.81E-05 | -1.54417 | PCSK2     | 3.99E-08   | 4.02659 | GHR              | 3.29E-07   | 5.66058 |
| FAM122B            | 0.00013  | -1.54361 | FLJ11286  | 4.93E-07   | 4.05145 | TNFSF10          | 2.54E-08   | 5.95002 |
| RABEPK             | 0.00076  | -1.54296 | SELM      | 2.39E-05   | 4.06022 | CCDC83           | 1.96E-08   | 6.00465 |
| ESR1               | 0.00061  | -1.54291 | DDX60L    | 0.00013766 | 4.16412 | TRIB2            | 9.66E-07   | 6.0109  |
| ZNF148             | 0.00041  | -1.5428  | TSKU      | 8.49E-09   | 4.2288  | TSKU             | 1.44E-09   | 6.07744 |
| LCORL              | 1.82E-05 | -1.54224 | HHEX      | 5.84E-08   | 4.23286 | FGF18            | 4.65E-07   | 6.11296 |
| SEPN1              | 0.00106  | -1.54212 | CORO2A    | 5.50E-09   | 4.24918 | HHEX             | 5.70E-07   | 6.35024 |
| EHBP1L1            | 0.00572  | -1.54147 | SLC7A11   | 1.94E-06   | 4.26055 | NELL2            | 2.44E-11   | 6.42199 |
| RAPGEF6            | 8.13E-07 | -1.54142 | LOC286167 | 1.31E-07   | 4.26121 | GPR37            | 4.20E-06   | 6.55891 |
| KLHDC3             | 3.69E-05 | -1.54135 | TAP2      | 6.82E-07   | 4.2654  | PSCA             | 2.99E-05   | 6.81012 |
| SP1                | 2.74E-05 | -1.54117 | SERPINA5  | 4.00E-09   | 4.28891 | GDF15            | 2.34E-12   | 6.81824 |
| EPS8L1             | 3.90E-05 | -1.54109 | FLJ11286  | 4.76E-08   | 4.2957  | PAQR5            | 9.22E-08   | 7.12485 |
| SMAP1              | 1.23E-05 | -1.54108 | TNFSF10   | 1.23E-07   | 4.30188 | TEX14            | 1.15E-09   | 7.32275 |
| CCAR1              | 0.01096  | -1.54095 | GHR       | 1.23E-06   | 4.3127  | MME              | 2.44E-09   | 7.45856 |
| ---                | 0.0012   | -1.54049 | HERC6     | 6.85E-10   | 4.34256 | FAM83A           | 2.59E-08   | 7.52265 |
| LOC652755 /// NAIP | 0.00032  | -1.54017 | FAM105A   | 4.37E-07   | 4.40193 | GPR37            | 1.04E-10   | 7.71955 |
| M-RIP              | 1.32E-07 | -1.54011 | CORO2A    | 1.88E-10   | 4.41172 | FAM83A           | 3.07E-09   | 8.43754 |
| SACS               | 0.00447  | -1.5401  | SAMD9     | 2.41E-06   | 4.41585 | IFI44            | 3.37E-07   | 8.81801 |
| ---                | 0.0037   | -1.54009 | IFIT5     | 4.91E-10   | 4.41595 | MAP1B            | 3.94E-08   | 9.42296 |
| ---                | 0.00722  | -1.54008 | HERC5     | 4.01E-08   | 4.45958 | SERPINA5         | 1.15E-10   | 9.72364 |
| LPCAT1             | 2.42E-07 | -1.54    | DDX58     | 2.14E-12   | 4.4696  | XAF1             | 2.93E-08   | 9.72658 |

|          |          |          |          |           |         |         |          |         |
|----------|----------|----------|----------|-----------|---------|---------|----------|---------|
| PPT2     | 0.00473  | -1.53978 | FGF18    | 1.98E-06  | 4.47807 | TNFSF10 | 2.56E-10 | 10.1288 |
| FLJ27365 | 0.01052  | -1.53967 | PARP9    | 5.62E-13  | 4.55138 | ---     | 4.37E-06 | 10.3689 |
| GPR153   | 0.00127  | -1.53952 | MME      | 2.24E-08  | 4.56135 | AOX1    | 2.36E-11 | 10.7379 |
| ---      | 0.00096  | -1.53947 | SAMHD1   | 1.80E-06  | 4.61835 | CCL20   | 4.88E-10 | 10.8564 |
| PDCD10   | 1.97E-07 | -1.5394  | FLJ11286 | 7.59E-14  | 4.64371 | TNFSF10 | 6.69E-08 | 10.911  |
| DTWD1    | 0.00119  | -1.53932 | TMPRSS2  | 2.70E-06  | 4.69283 | CYP2C8  | 6.67E-12 | 12.4514 |
| CNPY3    | 1.11E-06 | -1.5393  | FAM134B  | 3.31E-10  | 4.70359 | MAP1B   | 2.84E-07 | 13.481  |
| DR1      | 0.00037  | -1.53925 | FAM134B  | 6.09E-08  | 4.80323 | XAF1    | 4.36E-10 | 16.4274 |
| CAMSAP1  | 5.22E-05 | -1.53917 | RPRM     | 4.01E-07  | 4.8468  |         |          |         |
| ---      | 0.00441  | -1.53893 | LAMP3    | 7.36E-06  | 4.85744 |         |          |         |
| FERMT2   | 1.15E-07 | -1.53855 | MMD      | 6.20E-11  | 4.89161 |         |          |         |
| PLGLB2   | 0.00062  | -1.53836 | UBE2L6   | 4.95E-11  | 4.91636 |         |          |         |
| TNPO2    | 1.30E-07 | -1.53828 | GPX2     | 0.0002586 | 4.94013 |         |          |         |
| 9-Sep    | 2.41E-07 | -1.53799 | XAF1     | 2.89E-05  | 4.944   |         |          |         |
| ALDH3A2  | 0.0062   | -1.53781 | TIMP3    | 9.23E-07  | 4.97222 |         |          |         |
| NR2F2    | 2.65E-07 | -1.5378  | TEX14    | 6.36E-09  | 4.97276 |         |          |         |
| ---      | 0.01432  | -1.53731 | GBP3     | 5.90E-05  | 4.98669 |         |          |         |
| ---      | 0.00011  | -1.53726 | IFI27    | 3.47E-10  | 5.00325 |         |          |         |
| SERPINB1 | 0.00289  | -1.53723 | SLC41A2  | 1.38E-05  | 5.05993 |         |          |         |
| PLCG1    | 3.47E-05 | -1.53721 | IFIT5    | 7.45E-11  | 5.08565 |         |          |         |
| ZNF280D  | 0.0021   | -1.5369  | FZD8     | 1.68E-08  | 5.20496 |         |          |         |
| LRRC59   | 8.09E-09 | -1.53666 | CLEC7A   | 2.85E-08  | 5.38379 |         |          |         |
| C6orf129 | 0.00027  | -1.53639 | GDF15    | 6.16E-12  | 5.47627 |         |          |         |
| EPS8L1   | 2.92E-08 | -1.53612 | SCNN1A   | 6.97E-07  | 5.72392 |         |          |         |
| CDC42BPA | 7.39E-05 | -1.5359  | SAMD9    | 1.76E-08  | 5.8596  |         |          |         |
| ZNF789   | 0.00081  | -1.53581 | OAS1     | 3.45E-12  | 5.99803 |         |          |         |
| ---      | 0.00384  | -1.53556 | BST2     | 8.27E-08  | 6.15801 |         |          |         |
| FLJ13236 | 0.00079  | -1.53552 | C8orf57  | 8.13E-08  | 6.16445 |         |          |         |
| STX6     | 2.72E-06 | -1.53522 | PAQR5    | 1.56E-07  | 6.26993 |         |          |         |
| ---      | 0.00215  | -1.53517 | OASL     | 7.32E-08  | 6.2943  |         |          |         |
| WDR4     | 1.45E-05 | -1.53507 | FAM83A   | 1.69E-08  | 6.31248 |         |          |         |
| ---      | 0.00098  | -1.53443 | CCL5     | 1.60E-07  | 6.40194 |         |          |         |
| CPT1A    | 0.0072   | -1.53418 | OAS1     | 3.94E-09  | 6.60424 |         |          |         |
| PSMC2    | 4.73E-06 | -1.53414 | MMP16    | 7.57E-07  | 6.71636 |         |          |         |
| ZNF148   | 0.0161   | -1.53395 | GPR37    | 3.46E-06  | 6.88949 |         |          |         |
| CDC42    | 1.94E-06 | -1.53369 | FZD8     | 2.20E-11  | 6.98037 |         |          |         |
| ---      | 0.00044  | -1.53363 | USP18    | 2.00E-11  | 7.00878 |         |          |         |
| ENSA     | 2.64E-05 | -1.5333  | TNFSF10  | 9.34E-10  | 7.15327 |         |          |         |
| NPHP3    | 0.00019  | -1.5333  | CCDC46   | 5.95E-08  | 7.38749 |         |          |         |
| KALRN    | 3.78E-05 | -1.53321 | TNFSF10  | 2.65E-07  | 7.41514 |         |          |         |
| ---      | 0.01978  | -1.53296 | HHEX     | 2.83E-07  | 7.56519 |         |          |         |
| ---      | 0.0136   | -1.53291 | GPR37    | 9.59E-11  | 7.87384 |         |          |         |
| BRD8     | 0.0058   | -1.53281 | ---      | 9.34E-06  | 8.27646 |         |          |         |
| TDG      | 9.44E-07 | -1.53241 | IFIT1    | 2.53E-12  | 8.49666 |         |          |         |
| CTHRC1   | 0.00096  | -1.53224 | PSMB9    | 1.95E-08  | 8.63678 |         |          |         |
| ---      | 0.00932  | -1.5321  | DDX60    | 1.42E-09  | 8.99881 |         |          |         |
| CCDC18   | 0.00174  | -1.53188 | IFIT2    | 5.16E-09  | 9.04642 |         |          |         |
| GRK6     | 0.00034  | -1.53172 | OASL     | 7.14E-09  | 9.09851 |         |          |         |
| RHPN2    | 1.82E-05 | -1.53172 | CMPK2    | 2.42E-11  | 9.19256 |         |          |         |

|              |          |          |         |          |         |
|--------------|----------|----------|---------|----------|---------|
| TP53AP1      | 9.53E-08 | -1.53166 | FAM83A  | 1.20E-08 | 9.2387  |
| GUSB         | 4.01E-07 | -1.53162 | TRIB2   | 1.72E-07 | 9.40612 |
| FSD1         | 1.14E-05 | -1.53114 | MAP1B   | 3.73E-08 | 9.56813 |
| MAL2         | 0.00048  | -1.53089 | NELL2   | 5.12E-12 | 9.59857 |
| OSBPL8       | 0.00012  | -1.53088 | AOX1    | 2.89E-11 | 10.1178 |
| SGK269       | 0.0001   | -1.53079 | FAM83A  | 1.21E-09 | 10.9975 |
| ALDH16A1     | 9.18E-06 | -1.53016 | RARRES3 | 1.14E-10 | 11.3675 |
| VISA         | 3.54E-08 | -1.5299  | CCL20   | 3.93E-10 | 11.5932 |
| GTF2H1       | 3.80E-05 | -1.52988 | RSAD2   | 3.49E-08 | 12.3848 |
| ---          | 4.57E-05 | -1.52987 | IFI44L  | 3.79E-11 | 12.4958 |
| LOC100131564 | 2.65E-05 | -1.52978 | RSAD2   | 1.02E-09 | 12.7783 |
| RBM14        | 0.00023  | -1.52974 | CYP2C8  | 5.74E-12 | 13.0625 |
| PKD2         | 0.00113  | -1.52969 | MAP1B   | 2.85E-07 | 13.4671 |
| PHF15        | 0.00727  | -1.52939 | PSMB8   | 2.06E-07 | 14.7549 |
| BAG5         | 3.21E-07 | -1.52929 | IFIT3   | 4.26E-10 | 18.3565 |
| MPP7         | 0.00214  | -1.52917 | IFIT3   | 5.14E-10 | 18.403  |
| ZNF124       | 0.00073  | -1.529   | OAS2    | 2.61E-08 | 18.8273 |
| GPAM         | 0.0009   | -1.52893 | OAS2    | 7.94E-08 | 19.1964 |
| TEAD3        | 7.29E-05 | -1.52846 | IFI44   | 4.29E-10 | 19.6951 |
| BCL9         | 1.82E-05 | -1.52845 | IFI44   | 2.02E-08 | 22.6235 |
| LANCL2       | 0.00054  | -1.52804 | XAF1    | 5.42E-10 | 43.2221 |
| ZNF254       | 6.14E-05 | -1.52783 | XAF1    | 1.56E-11 | 70.1671 |
| ZNF260       | 1.42E-08 | -1.5277  |         |          |         |
| TMEM97       | 7.60E-06 | -1.52768 |         |          |         |
| ---          | 0.0017   | -1.52767 |         |          |         |
| FLJ22184     | 0.00578  | -1.52767 |         |          |         |
| ---          | 0.00899  | -1.52742 |         |          |         |
| ATXN1        | 4.08E-05 | -1.52736 |         |          |         |
| ---          | 0.00171  | -1.5272  |         |          |         |
| ---          | 0.02394  | -1.52695 |         |          |         |
| ERBB3        | 4.45E-08 | -1.52689 |         |          |         |
| ENDOGL1      | 0.00032  | -1.52664 |         |          |         |
| ---          | 0.03309  | -1.52645 |         |          |         |
| ERC1         | 0.00448  | -1.5261  |         |          |         |
| ---          | 0.00443  | -1.52609 |         |          |         |
| ---          | 1.81E-05 | -1.52607 |         |          |         |
| ---          | 0.00109  | -1.52599 |         |          |         |
| MRC2         | 0.00815  | -1.52585 |         |          |         |
| KIAA0146     | 2.89E-05 | -1.52579 |         |          |         |
| SELENBP1     | 2.36E-08 | -1.52562 |         |          |         |
| AKAP11       | 3.36E-07 | -1.52552 |         |          |         |
| CCDC90A      | 0.00094  | -1.52548 |         |          |         |
| ACD          | 1.66E-07 | -1.52524 |         |          |         |
| MNX1         | 8.64E-05 | -1.52511 |         |          |         |
| CDK10        | 0.00039  | -1.52499 |         |          |         |
| C11orf49     | 3.23E-06 | -1.52489 |         |          |         |
| ARSD         | 0.00828  | -1.52482 |         |          |         |
| NUP85        | 1.26E-06 | -1.52474 |         |          |         |
| C9orf80      | 4.04E-05 | -1.52473 |         |          |         |

|                     |          |          |
|---------------------|----------|----------|
| ZNF260              | 0.00067  | -1.52467 |
| NANP                | 0.00061  | -1.52439 |
| AHDC1               | 0.00012  | -1.5243  |
| CHRAC1              | 4.03E-05 | -1.524   |
| TAF6L               | 0.01474  | -1.52375 |
| GLUD1               | 8.36E-07 | -1.52357 |
| H6PD                | 0.00106  | -1.52309 |
| LAGE3               | 3.35E-05 | -1.52281 |
| FCHO1               | 0.01768  | -1.52216 |
| CA11                | 0.00353  | -1.52209 |
| LOC256273           | 0.00135  | -1.52208 |
| TAF5L               | 1.04E-06 | -1.52196 |
| LOC100130776        | 1.01E-05 | -1.52192 |
| CCNL2               | 2.92E-07 | -1.5219  |
| KCTD13              | 0.00031  | -1.52186 |
| ---                 | 0.00252  | -1.52172 |
| HNRNPD              | 1.99E-06 | -1.52167 |
| PCP4                | 3.79E-05 | -1.52157 |
| CENTD1              | 7.28E-05 | -1.52145 |
| CASC4               | 0.02355  | -1.52135 |
| ---                 | 0.00157  | -1.52056 |
| ---                 | 0.00104  | -1.52055 |
| JOSD1               | 0.00174  | -1.52023 |
| PRKDC               | 1.42E-08 | -1.52021 |
| MYST3               | 6.26E-05 | -1.5202  |
| MAPRE1              | 1.59E-05 | -1.52    |
| EPB41L4B            | 2.48E-08 | -1.51947 |
| ---                 | 8.72E-05 | -1.51937 |
| ALG6                | 6.25E-05 | -1.51915 |
| RBMX                | 1.11E-07 | -1.51905 |
| ---                 | 0.00961  | -1.51898 |
| ---                 | 0.01474  | -1.5188  |
| ZBTB44              | 0.00523  | -1.51876 |
| C3orf63             | 4.75E-07 | -1.51868 |
| HNRNPA0             | 3.22E-06 | -1.51865 |
| DAK                 | 0.01969  | -1.51863 |
| CRYZ                | 3.61E-06 | -1.51793 |
| 00134282 /// LOC100 | 4.64E-08 | -1.51785 |
| AK2                 | 9.99E-05 | -1.5175  |
| AP2A1               | 0.00725  | -1.51747 |
| ---                 | 0.00456  | -1.51737 |
| WDR68               | 7.82E-05 | -1.51703 |
| SNX24               | 0.00575  | -1.51686 |
| FLJ44342            | 0.00822  | -1.51658 |
| SMC1A               | 0.00442  | -1.51648 |
| ATM                 | 0.00532  | -1.51636 |
| ---                 | 0.00905  | -1.51633 |
| FMN1                | 0.00046  | -1.51614 |
| PARD6B              | 0.09012  | -1.51604 |



|           |          |          |
|-----------|----------|----------|
| PCDHB2    | 0.00554  | -1.51594 |
| CMTM4     | 9.52E-05 | -1.51581 |
| NFATC4    | 0.02886  | -1.51569 |
| TNPO2     | 0.00015  | -1.51557 |
| ERGIC2    | 0.00781  | -1.5155  |
| TMEM97    | 3.91E-06 | -1.51544 |
| GUCY1B3   | 0.08618  | -1.51542 |
| ---       | 0.00037  | -1.5153  |
| ---       | 0.00056  | -1.515   |
| NNT       | 4.37E-05 | -1.51499 |
| RASEF     | 0.00058  | -1.51467 |
| GAK       | 1.41E-08 | -1.51435 |
| C1orf112  | 0.00038  | -1.51433 |
| SLC25A22  | 0.00066  | -1.51419 |
| ZCCHC17   | 1.09E-06 | -1.5141  |
| H2AFJ     | 0.00412  | -1.51358 |
| NDRG2     | 0.00326  | -1.5132  |
| RNASET2   | 7.17E-08 | -1.5132  |
| RAP2C     | 7.97E-05 | -1.5132  |
| LICAM     | 0.00032  | -1.51309 |
| ---       | 0.00716  | -1.51306 |
| DCAKD     | 0.12789  | -1.51304 |
| C15orf29  | 7.51E-05 | -1.51297 |
| CADPS2    | 9.20E-05 | -1.51277 |
| NFIC      | 1.43E-06 | -1.51254 |
| AGPAT7    | 0.00058  | -1.51243 |
| ---       | 0.00353  | -1.51207 |
| EPHA4     | 0.00029  | -1.51189 |
| LOC137886 | 9.13E-08 | -1.51187 |
| 10-Sep    | 1.93E-06 | -1.51181 |
| DOK1      | 0.004    | -1.51171 |
| LOC202181 | 0.00119  | -1.5116  |
| ALDH7A1   | 1.54E-08 | -1.51138 |
| ZNF160    | 0.00456  | -1.5113  |
| MEIS1     | 0.00107  | -1.51129 |
| FRMD4A    | 0.00179  | -1.51125 |
| ---       | 4.20E-05 | -1.51115 |
| MAOA      | 0.01635  | -1.51103 |
| ERBB4     | 2.65E-05 | -1.51083 |
| HMGB1     | 2.64E-06 | -1.51082 |
| SNX26     | 0.00215  | -1.51077 |
| APLN      | 0.00132  | -1.51072 |
| ---       | 0.00107  | -1.51059 |
| ---       | 0.00104  | -1.51043 |
| ---       | 0.0013   | -1.5104  |
| ---       | 0.0009   | -1.51032 |
| FAM53C    | 1.17E-05 | -1.50992 |
| PPA2      | 1.90E-06 | -1.50964 |
| ---       | 0.00095  | -1.50953 |

|                     |          |          |
|---------------------|----------|----------|
| C1orf176            | 0.0002   | -1.50941 |
| GAK                 | 4.88E-06 | -1.50938 |
| ---                 | 0.00575  | -1.50933 |
| TMEM64              | 0.00048  | -1.50897 |
| GSG2                | 0.02764  | -1.50896 |
| FLJ27352            | 0.00247  | -1.50835 |
| ---                 | 0.00128  | -1.50821 |
| ---                 | 0.00175  | -1.50818 |
| PCBP2               | 2.94E-06 | -1.50815 |
| RPL37               | 0.0009   | -1.50815 |
| GTF3C1              | 3.59E-08 | -1.50813 |
| OSMR                | 0.00597  | -1.50808 |
| MTHFD1              | 1.47E-06 | -1.50782 |
| SP4                 | 9.83E-06 | -1.50767 |
| ---                 | 0.0006   | -1.50749 |
| KIF26A              | 0.00057  | -1.5071  |
| ---                 | 1.97E-05 | -1.50703 |
| SS18                | 0.00142  | -1.50699 |
| ZNF652              | 2.01E-06 | -1.50699 |
| FMO5                | 0.00188  | -1.50696 |
| RBM38               | 2.51E-06 | -1.50694 |
| KBTD4               | 0.00014  | -1.50661 |
| MLLT10              | 0.00097  | -1.50656 |
| PTPRF               | 1.38E-05 | -1.50624 |
| P15RS               | 8.94E-07 | -1.50618 |
| RBM8A               | 7.58E-06 | -1.50614 |
| PRIM2               | 0.00458  | -1.50603 |
| HDGF                | 1.29E-05 | -1.50584 |
| ---                 | 0.00299  | -1.50579 |
| PHACTR4             | 9.65E-05 | -1.50578 |
| COL12A1             | 0.00271  | -1.50578 |
| ---                 | 0.00118  | -1.50574 |
| TXN                 | 7.15E-07 | -1.50549 |
| ---                 | 0.004    | -1.5052  |
| ---                 | 2.25E-07 | -1.50491 |
| TNRC6C              | 0.002    | -1.50486 |
| STAG1               | 0.023    | -1.50484 |
| C7orf29             | 0.00068  | -1.50436 |
| NIPBL               | 0.00025  | -1.50427 |
| ---                 | 1.09E-08 | -1.50413 |
| C19orf43            | 2.82E-06 | -1.50412 |
| SGPL1               | 9.19E-07 | -1.50406 |
| KIAA1704            | 0.00452  | -1.50402 |
| MAP3K2              | 0.00438  | -1.50389 |
| GLUL                | 0.00019  | -1.50385 |
| UNC45A              | 1.66E-06 | -1.50352 |
| M1 /// CALM2 /// CA | 8.04E-07 | -1.5033  |
| ---                 | 0.00118  | -1.50324 |
| UBTF                | 6.92E-08 | -1.50302 |

|           |          |          |
|-----------|----------|----------|
| NKTR      | 0.04656  | -1.503   |
| PWWP2A    | 0.00072  | -1.50299 |
| ENTPD2    | 2.26E-06 | -1.5025  |
| LCOR      | 0.00013  | -1.5023  |
| EMP2      | 5.36E-06 | -1.50215 |
| BUD13     | 9.42E-05 | -1.50184 |
| SMARCC2   | 4.40E-05 | -1.50162 |
| SPRED2    | 0.0003   | -1.50136 |
| MTG1      | 0.00453  | -1.50136 |
| SLC25A23  | 0.00248  | -1.50081 |
| NARG2     | 0.00152  | -1.50048 |
| ---       | 0.00033  | -1.50047 |
| NET1      | 0.00028  | -1.50045 |
| ---       | 0.02462  | 1.50006  |
| ---       | 0.01478  | 1.50047  |
| MESP1     | 0.0061   | 1.50055  |
| C1orf9    | 2.90E-06 | 1.5006   |
| PGRMC2    | 6.95E-05 | 1.50064  |
| ENC1      | 0.03389  | 1.50077  |
| USP53     | 0.00069  | 1.50092  |
| ---       | 0.03024  | 1.50104  |
| SGMS1     | 0.00498  | 1.50105  |
| C20orf194 | 0.00079  | 1.50115  |
| ECD       | 2.52E-07 | 1.5012   |
| ATP13A3   | 0.00176  | 1.5012   |
| P4HA2     | 5.47E-06 | 1.50132  |
| BCAP29    | 0.0002   | 1.50144  |
| ---       | 0.04571  | 1.50144  |
| HCG18     | 0.00114  | 1.50151  |
| BCCIP     | 3.99E-05 | 1.50181  |
| ---       | 1.18E-05 | 1.50186  |
| FGF18     | 0.01418  | 1.50237  |
| RBPM5     | 0.00032  | 1.50262  |
| CLIP1     | 0.00659  | 1.50301  |
| GRB14     | 0.00033  | 1.50313  |
| PHLDA3    | 0.00052  | 1.50319  |
| HERC4     | 0.00012  | 1.50368  |
| C6orf166  | 0.00445  | 1.50427  |
| FOXO3     | 0.0004   | 1.5043   |
| 3-Mar     | 0.01247  | 1.50436  |
| WDR89     | 2.72E-05 | 1.50473  |
| TSG101    | 1.04E-06 | 1.50493  |
| SHISA5    | 5.28E-06 | 1.50511  |
| TMEM42    | 0.00032  | 1.50511  |
| KIAA1946  | 0.06967  | 1.50514  |
| MAX       | 2.28E-05 | 1.50516  |
| ---       | 8.83E-05 | 1.50519  |
| SRI       | 3.04E-07 | 1.50525  |
| SOX2      | 2.32E-05 | 1.50538  |

|                   |          |         |
|-------------------|----------|---------|
| ESPN              | 7.75E-05 | 1.50542 |
| YAF2              | 0.00032  | 1.50543 |
| IQSEC1            | 0.00065  | 1.50581 |
| NQO1              | 3.00E-06 | 1.50584 |
| ---               | 0.02084  | 1.50629 |
| AKTIP             | 3.41E-09 | 1.50652 |
| PSCD3             | 0.00231  | 1.50676 |
| NFE2L1            | 4.43E-06 | 1.50702 |
| CEP63             | 0.00032  | 1.50713 |
| TM2D1             | 7.36E-05 | 1.5072  |
| ALG13 /// CXorf45 | 1.72E-05 | 1.50742 |
| GOLT1B            | 1.14E-05 | 1.50755 |
| ZNF252            | 0.00018  | 1.50772 |
| DTNA              | 0.03478  | 1.50772 |
| ST8SIA4           | 0.00087  | 1.50796 |
| C9orf3            | 0.00013  | 1.50797 |
| CREB3L2           | 0.00024  | 1.50806 |
| GOSR2             | 0.00033  | 1.50855 |
| RIOK2             | 3.47E-05 | 1.50888 |
| RTCD1             | 4.83E-05 | 1.50913 |
| ELL               | 0.04785  | 1.50983 |
| DNAJA4            | 0.03203  | 1.50998 |
| ARMCX5            | 0.00527  | 1.51002 |
| C14orf73          | 0.00233  | 1.51005 |
| CFB               | 1.25E-05 | 1.51019 |
| OSGIN2            | 0.06795  | 1.51029 |
| ZNF33B            | 0.00047  | 1.5106  |
| ---               | 5.16E-06 | 1.51078 |
| RELL2             | 0.00343  | 1.51095 |
| EXOSC4            | 8.33E-05 | 1.5111  |
| SLC39A1           | 1.40E-07 | 1.51114 |
| SLC35A2           | 0.00026  | 1.51118 |
| OGT               | 9.95E-06 | 1.51132 |
| C2orf55           | 0.0006   | 1.51133 |
| GLG1              | 0.02155  | 1.51147 |
| ZFAND3            | 0.00038  | 1.5118  |
| MYO5B             | 1.08E-06 | 1.51239 |
| MPI               | 3.82E-05 | 1.51259 |
| EPAS1             | 0.01753  | 1.51271 |
| LBA1              | 3.00E-05 | 1.51283 |
| LOC729446         | 0.01018  | 1.51284 |
| RHOQ              | 2.56E-05 | 1.51288 |
| CHCHD7            | 0.00025  | 1.51288 |
| C1orf108          | 5.88E-05 | 1.51339 |
| CSNK1E            | 0.0004   | 1.51356 |
| ORMDL3            | 0.1196   | 1.51358 |
| YIPF6             | 9.67E-05 | 1.51378 |
| KLF9              | 0.01162  | 1.51397 |
| PDCD6IP           | 4.97E-05 | 1.51413 |

|                     |          |         |
|---------------------|----------|---------|
| FIS1                | 0.00041  | 1.51456 |
| RPL13               | 1.27E-05 | 1.51506 |
| SGSH                | 0.06838  | 1.5153  |
| STX3                | 0.00011  | 1.51535 |
| NLE1                | 0.00099  | 1.51537 |
| ZNF227              | 0.00367  | 1.51541 |
| SLC25A46            | 8.12E-08 | 1.51545 |
| FBXO3               | 2.68E-05 | 1.51588 |
| WBP1 /// ZNHIT4     | 3.63E-05 | 1.5164  |
| TICAM1              | 0.0109   | 1.51668 |
| KLF3                | 0.00312  | 1.51691 |
| LOC90826            | 0.00055  | 1.51711 |
| PLEKHG6             | 0.01368  | 1.51789 |
| CYP51A1             | 0.01051  | 1.51818 |
| BTBD14A             | 0.02618  | 1.5182  |
| MFAP3               | 4.69E-06 | 1.51826 |
| GPX3                | 5.57E-06 | 1.51831 |
| PIP5K1A             | 0.00046  | 1.51843 |
| FYCO1               | 8.08E-05 | 1.51871 |
| BSDC1               | 7.57E-06 | 1.51906 |
| MIRN21              | 2.51E-06 | 1.51936 |
| FSD1L               | 0.01191  | 1.51952 |
| EPS15L1             | 0.0001   | 1.51991 |
| ABAT                | 3.90E-07 | 1.52047 |
| ---                 | 0.01128  | 1.52058 |
| TRAF3               | 0.00924  | 1.5209  |
| JMJD2B              | 0.00368  | 1.52092 |
| TRIM27              | 1.12E-07 | 1.52131 |
| PSD3                | 2.57E-05 | 1.52133 |
| ATP5S               | 2.05E-05 | 1.52151 |
| RNF146              | 0.00055  | 1.52186 |
| C22orf27            | 1.85E-05 | 1.52194 |
| LDLR                | 0.0005   | 1.52195 |
| F2RL1               | 0.00133  | 1.52204 |
| HEBP1               | 3.47E-07 | 1.52207 |
| ACLY                | 1.59E-06 | 1.52221 |
| SMPDL3A             | 2.72E-05 | 1.5232  |
| AGGF1               | 0.00294  | 1.52342 |
| PTGES               | 0.00074  | 1.52361 |
| C100128167 /// SLC3 | 0.00275  | 1.5238  |
| EFHD1               | 3.84E-05 | 1.52386 |
| RRP12               | 0.00446  | 1.52395 |
| ---                 | 0.00468  | 1.524   |
| LGALS3              | 3.86E-08 | 1.52404 |
| ---                 | 0.00213  | 1.52429 |
| C2orf15             | 0.00479  | 1.52463 |
| FECH                | 0.00022  | 1.52486 |
| ---                 | 0.00227  | 1.52498 |
| SP3                 | 3.55E-07 | 1.52508 |

|                     |          |         |
|---------------------|----------|---------|
| LOC116349           | 0.00166  | 1.52527 |
| LOC374443           | 0.02449  | 1.52537 |
| EHD3                | 0.00168  | 1.52575 |
| HRBL                | 5.34E-05 | 1.52584 |
| ENO2                | 2.57E-08 | 1.52609 |
| SYVN1               | 1.98E-05 | 1.52614 |
| PTDSS2              | 9.36E-06 | 1.52618 |
| EID3                | 0.0008   | 1.52649 |
| PPFIBP1             | 0.00551  | 1.52651 |
| LOC137886           | 0.00279  | 1.52682 |
| FAM21C /// FAM21D   | 2.13E-06 | 1.52686 |
| CMTM8               | 0.00048  | 1.52689 |
| SFXN4               | 1.22E-06 | 1.52778 |
| PIK3R1              | 0.00026  | 1.52832 |
| ABCC10              | 1.67E-05 | 1.52876 |
| RRP9                | 9.10E-05 | 1.52883 |
| ZNF789              | 0.00012  | 1.52901 |
| SESN2               | 2.71E-05 | 1.52918 |
| BECN1               | 1.18E-05 | 1.52937 |
| C100128167 /// SLC3 | 1.75E-06 | 1.52958 |
| RAI2                | 0.01361  | 1.52973 |
| ACSL3               | 0.00018  | 1.53013 |
| CCNH                | 5.13E-09 | 1.53018 |
| PIGL                | 0.00503  | 1.53029 |
| ---                 | 0.00643  | 1.53042 |
| CLK1                | 4.73E-05 | 1.53043 |
| ---                 | 8.22E-07 | 1.53043 |
| ZNF436              | 0.00014  | 1.53054 |
| PHACTR2             | 2.94E-05 | 1.53083 |
| ISL2                | 0.11574  | 1.53085 |
| STOM                | 6.08E-07 | 1.5309  |
| CTTN                | 6.20E-07 | 1.53094 |
| CXorf56             | 8.76E-05 | 1.53096 |
| FAHD1               | 3.31E-05 | 1.5312  |
| MB                  | 2.16E-05 | 1.53121 |
| SCLY                | 0.00024  | 1.53155 |
| FBXO8               | 0.00024  | 1.53178 |
| TRIB2               | 0.01325  | 1.53195 |
| ---                 | 0.02642  | 1.532   |
| SOX4                | 4.99E-07 | 1.53216 |
| TUBB2A              | 2.65E-07 | 1.53218 |
| LOC100132341        | 0.01182  | 1.53224 |
| KLHL7               | 1.90E-05 | 1.53229 |
| OGFR                | 0.00019  | 1.53256 |
| LTB4DH              | 0.00022  | 1.53274 |
| TNPO1               | 4.28E-06 | 1.53318 |
| PNPLA8              | 7.35E-08 | 1.53341 |
| POFUT2              | 8.11E-07 | 1.53358 |
| NR1D2               | 0.00019  | 1.53365 |

|                       |          |         |
|-----------------------|----------|---------|
| ERO1L                 | 7.47E-07 | 1.53386 |
| UBE2O                 | 0.00115  | 1.53455 |
| TMEM208               | 0.00019  | 1.53457 |
| SPATA7                | 4.25E-06 | 1.53483 |
| ABHD2                 | 4.50E-05 | 1.53524 |
| ATP9A                 | 2.09E-07 | 1.53528 |
| PD3 /// RGPLD4 /// RC | 0.0003   | 1.53533 |
| HEXIM1                | 1.07E-05 | 1.53543 |
| QPRT                  | 2.65E-06 | 1.53579 |
| RBM19                 | 0.00021  | 1.53637 |
| AKTIP                 | 0.00015  | 1.53643 |
| MDK                   | 4.00E-06 | 1.53645 |
| NAPB                  | 0.00034  | 1.53661 |
| C9orf52               | 0.00455  | 1.53665 |
| ---                   | 0.00467  | 1.53677 |
| MSMB                  | 0.00014  | 1.5374  |
| TGFB3                 | 0.02835  | 1.53778 |
| FAM110C               | 0.00115  | 1.53786 |
| SLC25A36              | 8.72E-07 | 1.53818 |
| FAM114A1              | 5.75E-07 | 1.53829 |
| JMJD6                 | 2.66E-05 | 1.5383  |
| TIGD2                 | 0.00067  | 1.5387  |
| RILPL1                | 0.00026  | 1.53873 |
| ---                   | 8.44E-05 | 1.53873 |
| LOC100129196          | 0.00139  | 1.53879 |
| PFKFB4                | 0.00282  | 1.53892 |
| SETD4                 | 4.64E-05 | 1.53902 |
| ATP6V0E1              | 0.00209  | 1.53966 |
| GAD1                  | 0.00627  | 1.53967 |
| RNF150                | 0.01976  | 1.53981 |
| ATP6V1C2              | 0.0011   | 1.54021 |
| PPP3CC                | 0.00241  | 1.54033 |
| TncRNA                | 0.007    | 1.54053 |
| KIAA0922              | 1.61E-05 | 1.54055 |
| SAR1B                 | 6.68E-05 | 1.54057 |
| PEX13                 | 0.00773  | 1.54074 |
| ARL1                  | 1.02E-05 | 1.54075 |
| ---                   | 0.00282  | 1.54096 |
| CFL2                  | 2.72E-05 | 1.54105 |
| RAB21                 | 1.20E-09 | 1.54107 |
| C15orf39              | 0.02118  | 1.54151 |
| MTHFD1L               | 0.00394  | 1.5417  |
| SLC35E1               | 1.49E-05 | 1.54179 |
| CDS2                  | 1.69E-05 | 1.54206 |
| FAM107B               | 8.13E-07 | 1.54215 |
| ---                   | 0.00409  | 1.5425  |
| FTO                   | 2.08E-06 | 1.54256 |
| TRABD                 | 0.00386  | 1.54268 |
| WIPF1                 | 0.00387  | 1.54346 |

|          |          |         |
|----------|----------|---------|
| GNL3     | 1.71E-08 | 1.54387 |
| C3orf28  | 1.42E-07 | 1.54403 |
| SCCPDH   | 8.01E-08 | 1.54421 |
| FAM26F   | 0.00205  | 1.54449 |
| PITPNB   | 3.33E-07 | 1.54453 |
| VPS13C   | 1.02E-05 | 1.54478 |
| KCNMB3   | 0.00107  | 1.54533 |
| PITPNC1  | 0.02632  | 1.54534 |
| FLJ22167 | 0.00156  | 1.54536 |
| ETF1     | 1.30E-07 | 1.54567 |
| CDK6     | 0.07466  | 1.54582 |
| SEC23A   | 0.00026  | 1.54585 |
| C16orf68 | 6.17E-05 | 1.54626 |
| FAS      | 0.00026  | 1.54631 |
| CAB39L   | 0.00824  | 1.54665 |
| NFE2L1   | 1.01E-06 | 1.54674 |
| FEM1A    | 0.00044  | 1.54696 |
| N4BP2L2  | 0.00029  | 1.54698 |
| STEAP3   | 0.00878  | 1.54729 |
| NUPL1    | 0.00048  | 1.54778 |
| SCAMP2   | 4.52E-06 | 1.54828 |
| ---      | 0.00723  | 1.54828 |
| UNC13B   | 2.19E-05 | 1.54864 |
| MAFG     | 5.02E-07 | 1.54877 |
| ---      | 0.00891  | 1.54925 |
| BCAR3    | 0.00214  | 1.54945 |
| LYSMD2   | 1.52E-07 | 1.54948 |
| CCRK     | 0.00201  | 1.54956 |
| ---      | 0.00031  | 1.54963 |
| PRKCH    | 5.26E-05 | 1.54971 |
| C11orf71 | 0.00011  | 1.55036 |
| FAS      | 0.00059  | 1.55049 |
| MTERFD2  | 0.00133  | 1.55068 |
| MTHFR    | 0.01317  | 1.55123 |
| CASP8    | 0.00688  | 1.5513  |
| SLC25A36 | 2.56E-07 | 1.55151 |
| CNNM1    | 0.16057  | 1.55156 |
| STX7     | 0.00012  | 1.55174 |
| ANK3     | 8.73E-06 | 1.55202 |
| NLRC5    | 0.01638  | 1.55207 |
| ---      | 0.0006   | 1.55229 |
| MLX      | 9.23E-06 | 1.55241 |
| PMAIP1   | 0.00228  | 1.55311 |
| C2orf30  | 1.00E-08 | 1.5532  |
| C6orf106 | 2.64E-05 | 1.55414 |
| B2M      | 1.52E-06 | 1.5543  |
| SETDB2   | 1.89E-05 | 1.55434 |
| FBXO30   | 0.00011  | 1.55473 |
| FAM60A   | 4.67E-10 | 1.55479 |



|                     |          |         |
|---------------------|----------|---------|
| TOM1                | 2.47E-05 | 1.55503 |
| LOC100130097        | 0.0252   | 1.55506 |
| NSUN4               | 7.17E-06 | 1.55508 |
| LIN7B               | 2.59E-05 | 1.55519 |
| HNRNPU              | 0.00259  | 1.55535 |
| DNAJA2              | 0.00105  | 1.5554  |
| FYN                 | 0.00125  | 1.55578 |
| PYCR1               | 4.64E-05 | 1.55582 |
| LDLR                | 1.30E-06 | 1.55593 |
| C19orf24            | 5.08E-05 | 1.55603 |
| SFXN4               | 8.78E-05 | 1.55648 |
| TBC1D8              | 6.05E-05 | 1.5569  |
| MYO1E               | 0.00013  | 1.55694 |
| THAP3               | 0.00217  | 1.55752 |
| FZD7                | 0.0001   | 1.55764 |
| ---                 | 0.04421  | 1.55783 |
| LOC100130360        | 0.03714  | 1.55824 |
| SFMBT2              | 3.36E-07 | 1.55828 |
| SCAND1              | 0.00115  | 1.55855 |
| CCPG1               | 0.0001   | 1.55882 |
| WDR21A              | 1.93E-05 | 1.55889 |
| LOC645676           | 8.87E-06 | 1.55903 |
| P2RX2               | 0.00118  | 1.55906 |
| CPNE1               | 2.04E-05 | 1.5591  |
| CAMK2D              | 7.19E-06 | 1.5591  |
| UBE2D1              | 3.40E-05 | 1.55911 |
| CCDC93              | 0.00782  | 1.55932 |
| STAM2               | 0.02579  | 1.5595  |
| LDOC1               | 9.32E-07 | 1.5597  |
| IDUA                | 1.35E-05 | 1.55979 |
| PPP2R5B             | 0.0058   | 1.5598  |
| CNNM2               | 0.00394  | 1.56007 |
| LYPLAL1             | 1.14E-06 | 1.56015 |
| TMEM170             | 1.63E-06 | 1.56026 |
| CDK7                | 1.84E-06 | 1.561   |
| OGFR                | 0.00036  | 1.56107 |
| YIPF6               | 4.69E-07 | 1.56115 |
| XRN1                | 2.32E-05 | 1.5617  |
| JMJD4               | 1.20E-05 | 1.56216 |
| IFITM2              | 4.39E-08 | 1.56237 |
| NEK8                | 1.19E-06 | 1.56248 |
| RAB6A               | 6.66E-05 | 1.56256 |
| ZNF330              | 8.38E-08 | 1.56287 |
| C100131062 /// PTP4 | 0.00132  | 1.56321 |
| PFKFB2              | 7.93E-06 | 1.5634  |
| ITCH                | 0.00023  | 1.56352 |
| RAP1GAP             | 0.00051  | 1.56353 |
| COX4NB              | 0.00067  | 1.56364 |
| ISCU                | 4.20E-09 | 1.56381 |

|                   |          |         |
|-------------------|----------|---------|
| ---               | 0.00137  | 1.56425 |
| ---               | 0.00106  | 1.56432 |
| ME1               | 5.96E-07 | 1.56439 |
| STX16             | 1.75E-05 | 1.56466 |
| TMEM80            | 0.0002   | 1.56543 |
| ARL1              | 0.00042  | 1.56573 |
| FOXO3             | 3.99E-09 | 1.56584 |
| RGMB              | 0.00213  | 1.56613 |
| TAX1BP1           | 3.60E-06 | 1.56631 |
| UCHL3             | 2.38E-06 | 1.56666 |
| CHD2              | 0.01034  | 1.56672 |
| CHD2              | 0.00092  | 1.56679 |
| ---               | 0.02392  | 1.56705 |
| HCG4              | 0.00725  | 1.56706 |
| SWAP70            | 0.00566  | 1.56715 |
| SESN3             | 0.01795  | 1.56728 |
| PCYT2             | 0.00015  | 1.56731 |
| FAM98A            | 9.38E-06 | 1.56742 |
| NDRG1             | 6.76E-08 | 1.56794 |
| FAM21B /// FAM21C | 3.04E-06 | 1.56857 |
| EIF2A             | 2.57E-06 | 1.56862 |
| YIPF5             | 7.62E-05 | 1.5687  |
| SLC35A3           | 5.30E-05 | 1.56875 |
| TMED8             | 0.00047  | 1.56897 |
| PFDN2             | 1.46E-07 | 1.56962 |
| CCDC91            | 1.00E-04 | 1.56967 |
| ARPC4 /// TTLL3   | 0.00049  | 1.57029 |
| GBA2              | 0.00236  | 1.5705  |
| UTX               | 0.0071   | 1.57051 |
| ELL2              | 0.00052  | 1.57053 |
| SMAD3             | 5.37E-05 | 1.57061 |
| STAT2             | 6.10E-06 | 1.57071 |
| ABCA12            | 0.00015  | 1.57092 |
| MBNL2             | 0.00351  | 1.57109 |
| SESN2             | 1.31E-06 | 1.57115 |
| GADD45G           | 0.00422  | 1.57167 |
| LSS               | 4.86E-09 | 1.57171 |
| ELF3              | 5.37E-06 | 1.57191 |
| ST7L              | 5.17E-05 | 1.57222 |
| TCEAL1            | 6.15E-07 | 1.57287 |
| MPZL2             | 8.46E-06 | 1.57295 |
| TXNRD1            | 5.42E-07 | 1.57316 |
| HIVEP2            | 0.0007   | 1.57327 |
| FAM20C            | 1.30E-06 | 1.5734  |
| C9orf58           | 0.00018  | 1.57386 |
| YIPF4             | 0.00043  | 1.57432 |
| SOS2              | 0.00331  | 1.57454 |
| OSMR              | 0.00015  | 1.57477 |
| FOXO3             | 0.00062  | 1.57479 |

|           |          |         |
|-----------|----------|---------|
| WIP1      | 0.00015  | 1.57495 |
| CHPT1     | 0.00018  | 1.57505 |
| ARL6      | 0.00399  | 1.57509 |
| ---       | 0.03935  | 1.5751  |
| TMEM129   | 3.49E-05 | 1.57537 |
| C2orf43   | 0.00569  | 1.57574 |
| MGST1     | 1.28E-05 | 1.57615 |
| HEXA      | 9.29E-08 | 1.57625 |
| ---       | 1.96E-07 | 1.5763  |
| SLFN5     | 0.00572  | 1.57644 |
| HIST1H2BG | 2.09E-05 | 1.57709 |
| MREG      | 1.25E-05 | 1.5772  |
| CDKN2AIP  | 5.63E-06 | 1.57773 |
| EXOSC4    | 4.20E-05 | 1.57786 |
| ZFAND5    | 4.49E-07 | 1.57793 |
| BRWD1     | 4.28E-05 | 1.57843 |
| ATP6V0B   | 1.94E-05 | 1.57862 |
| RABGGTB   | 3.00E-06 | 1.57863 |
| ---       | 0.00042  | 1.57863 |
| NHLRC2    | 0.09242  | 1.57921 |
| CSG1cA-T  | 0.00015  | 1.57923 |
| PATL1     | 0.00033  | 1.57926 |
| SNX1      | 1.03E-07 | 1.57965 |
| COL4A3    | 0.02133  | 1.58064 |
| EXOC2     | 0.00035  | 1.58111 |
| FAM60A    | 6.56E-05 | 1.58136 |
| C10orf118 | 0.00653  | 1.58202 |
| RRAS2     | 5.86E-06 | 1.58206 |
| ---       | 0.0001   | 1.58245 |
| COPA      | 0.00266  | 1.58403 |
| RAB11FIP4 | 0.00022  | 1.5843  |
| MOBKL2C   | 0.00041  | 1.58433 |
| ELF5      | 0.00255  | 1.58495 |
| ZNF286A   | 0.00202  | 1.58502 |
| SPAG9     | 1.42E-05 | 1.58526 |
| BAK1      | 0.00516  | 1.58529 |
| AFF4      | 0.06332  | 1.58553 |
| CLDN4     | 4.54E-07 | 1.58582 |
| RSC1A1    | 0.0028   | 1.58589 |
| FECH      | 1.56E-08 | 1.58601 |
| LOC338651 | 0.00075  | 1.58619 |
| LATS2     | 0.00021  | 1.58642 |
| RNF170    | 0.00374  | 1.5867  |
| TAF8      | 0.00044  | 1.58692 |
| RCHY1     | 3.71E-07 | 1.58759 |
| ---       | 0.00741  | 1.58772 |
| FNDC3B    | 0.03246  | 1.58809 |
| IRS1      | 1.72E-06 | 1.5881  |
| MPZL2     | 0.01042  | 1.58816 |

|                   |          |         |
|-------------------|----------|---------|
| ---               | 0.00857  | 1.58862 |
| PTK6              | 2.69E-05 | 1.58869 |
| NR1D2             | 0.00682  | 1.58869 |
| HEL308            | 0.00032  | 1.58906 |
| RPS6KL1           | 4.23E-05 | 1.5894  |
| PAK2              | 4.30E-05 | 1.58949 |
| JOSD3             | 2.92E-06 | 1.58971 |
| SLC7A6 /// TRPV6  | 3.03E-07 | 1.58981 |
| ATP6V0E1          | 0.0011   | 1.58986 |
| WDR74             | 0.00012  | 1.58987 |
| GFPT1             | 2.80E-05 | 1.59018 |
| RNF123            | 6.13E-05 | 1.59028 |
| RHOBTB3           | 0.00029  | 1.5904  |
| RAPH1             | 0.00012  | 1.59045 |
| HLA-E             | 8.81E-07 | 1.59074 |
| ---               | 6.10E-05 | 1.5909  |
| TMLHE             | 0.00023  | 1.591   |
| SIX1              | 8.76E-05 | 1.59157 |
| KIAA0494          | 2.84E-05 | 1.59168 |
| EPB41L2           | 0.00023  | 1.59173 |
| GNB5              | 9.75E-05 | 1.59192 |
| ITFG1             | 0.00129  | 1.59225 |
| BSDC1             | 1.20E-05 | 1.59258 |
| NFIA              | 0.00082  | 1.59314 |
| TCEAL3            | 2.86E-06 | 1.59405 |
| ATP5G1            | 6.80E-07 | 1.5942  |
| ---               | 0.01856  | 1.59431 |
| RCHY1             | 2.68E-06 | 1.59458 |
| P117              | 0.00044  | 1.59458 |
| PRR15             | 1.76E-06 | 1.59466 |
| ---               | 0.00132  | 1.59516 |
| LPIN2             | 4.55E-05 | 1.59519 |
| TP53INP1          | 0.00318  | 1.59525 |
| CALU              | 1.62E-05 | 1.5956  |
| DDEFL1            | 0.00622  | 1.59575 |
| HIST1H3F          | 1.46E-06 | 1.59588 |
| FAM21B /// FAM21C | 1.25E-07 | 1.59593 |
| PCTK2             | 7.70E-05 | 1.59636 |
| AQP3              | 2.38E-07 | 1.59638 |
| CCNG2             | 1.46E-06 | 1.59674 |
| TRIB3             | 1.05E-05 | 1.59779 |
| HEATR1            | 0.02403  | 1.5979  |
| FOXO3             | 4.52E-06 | 1.59795 |
| ATG2B             | 0.00825  | 1.59801 |
| ---               | 0.00085  | 1.59802 |
| C17orf59          | 6.21E-06 | 1.59813 |
| ZSWIM6            | 8.13E-06 | 1.59815 |
| TAPBPL            | 0.00296  | 1.5982  |
| INSIG1            | 0.00039  | 1.59889 |

|                   |          |         |
|-------------------|----------|---------|
| ABAT              | 0.00052  | 1.59929 |
| MRTC1 /// LOC7286 | 3.72E-05 | 1.59994 |
| FAM50A            | 3.73E-07 | 1.59999 |
| RETSAT            | 0.00015  | 1.60112 |
| LACTB             | 2.90E-05 | 1.60124 |
| FAM107B           | 3.23E-05 | 1.60147 |
| ZBTB46            | 0.00028  | 1.60151 |
| PPP1R3F           | 3.80E-05 | 1.6017  |
| HACL1             | 2.42E-07 | 1.60188 |
| S1PR3             | 2.46E-06 | 1.60191 |
| ENSA              | 5.90E-07 | 1.60276 |
| MFSD1             | 4.75E-07 | 1.60295 |
| COMTD1            | 5.89E-05 | 1.60312 |
| SLC26A2           | 2.06E-05 | 1.60317 |
| PEX3              | 6.66E-06 | 1.60336 |
| C12orf49          | 6.08E-10 | 1.60338 |
| FAM21A /// FAM21B | 2.95E-07 | 1.60347 |
| TMED7             | 0.01072  | 1.60375 |
| CAB39L            | 7.02E-05 | 1.60378 |
| METAP2            | 0.00076  | 1.60402 |
| KLHDC2            | 9.66E-08 | 1.60414 |
| LOC400604         | 0.0011   | 1.60431 |
| NOL6              | 0.00442  | 1.60438 |
| ST8SIA4           | 0.00012  | 1.60489 |
| GBP1              | 0.00423  | 1.60516 |
| ATP2C2            | 0.00475  | 1.6052  |
| FAHD1             | 8.69E-06 | 1.60581 |
| EXOSC4            | 2.51E-06 | 1.60619 |
| KIF5B             | 5.13E-07 | 1.60621 |
| SLC25A20          | 0.01748  | 1.60624 |
| FNTA              | 7.52E-05 | 1.60676 |
| ESPN              | 0.00725  | 1.60707 |
| SYTL2             | 4.95E-06 | 1.60822 |
| UBE2F             | 0.00189  | 1.60838 |
| NLE1              | 1.47E-06 | 1.60955 |
| STAT2             | 5.69E-06 | 1.61016 |
| BOLA2 /// BOLA2B  | 6.96E-06 | 1.61071 |
| ---               | 0.00015  | 1.61099 |
| TMED7             | 0.00072  | 1.61128 |
| ENSA              | 1.44E-07 | 1.61153 |
| SH3BP5            | 3.56E-06 | 1.61171 |
| MID1IP1           | 1.35E-05 | 1.61172 |
| TSPAN5            | 0.00649  | 1.61181 |
| RIOK3             | 2.79E-07 | 1.61192 |
| MYO18A /// TIAF1  | 0.00951  | 1.6121  |
| KLHL28            | 0.00019  | 1.61247 |
| B4GALT4           | 0.00017  | 1.61258 |
| ---               | 0.00014  | 1.61277 |
| FLRT3             | 0.01444  | 1.61283 |

|                   |          |         |
|-------------------|----------|---------|
| NKHD1 /// EIF4EBP | 4.19E-07 | 1.61293 |
| ZNF770            | 1.08E-05 | 1.61313 |
| PRKAA1            | 0.00024  | 1.61314 |
| LPIN1             | 0.01426  | 1.61374 |
| CYP1A1            | 0.00038  | 1.61398 |
| RP5-1000E10.4     | 0.00068  | 1.61417 |
| CYP51A1           | 5.71E-06 | 1.61475 |
| RBM18             | 1.02E-05 | 1.61485 |
| FOXO3             | 3.08E-05 | 1.61488 |
| MAF               | 0.00139  | 1.61507 |
| COG1              | 0.00016  | 1.61523 |
| TARBP1            | 7.84E-06 | 1.61562 |
| APOOL             | 5.73E-06 | 1.61572 |
| YWHAG             | 4.47E-08 | 1.61575 |
| ---               | 0.0025   | 1.6161  |
| TRIM27            | 1.38E-05 | 1.61612 |
| PTGER4            | 0.00026  | 1.6165  |
| VEZT              | 5.22E-05 | 1.61703 |
| C21orf91          | 0.00067  | 1.61712 |
| ORMDL2            | 5.73E-07 | 1.61746 |
| TSPAN5            | 0.01639  | 1.61766 |
| BCL2L13           | 0.0037   | 1.61768 |
| ZDHHC2            | 0.00132  | 1.61785 |
| PDPK1             | 5.94E-06 | 1.61839 |
| CCNL1             | 3.75E-07 | 1.61866 |
| RNASE4            | 0.00027  | 1.61881 |
| BTG3              | 4.54E-06 | 1.61906 |
| CPD               | 0.01221  | 1.61914 |
| QTRT1             | 2.18E-05 | 1.61927 |
| PSCD2             | 8.23E-08 | 1.61971 |
| INSIG1            | 9.02E-08 | 1.61989 |
| SGEF              | 0.00087  | 1.6209  |
| LOC153346         | 0.00183  | 1.62146 |
| RETSAT            | 6.20E-07 | 1.62204 |
| EGLN1             | 4.43E-06 | 1.6221  |
| TAS2R14           | 0.0018   | 1.62232 |
| PRKRIP1           | 5.49E-08 | 1.62252 |
| WWC1              | 6.53E-05 | 1.62299 |
| ANKRD46           | 1.23E-05 | 1.62306 |
| NDUFV3            | 2.83E-05 | 1.6236  |
| TBC1D30           | 1.25E-05 | 1.62386 |
| SH3BP5            | 3.13E-07 | 1.62428 |
| LOC162993         | 2.28E-05 | 1.62531 |
| ACLY              | 4.77E-05 | 1.62533 |
| LEKR1             | 0.00022  | 1.62548 |
| ---               | 2.95E-05 | 1.62575 |
| SNRPC             | 1.14E-05 | 1.62614 |
| ANXA7             | 1.07E-09 | 1.62687 |
| COMT              | 5.56E-06 | 1.62747 |

|                     |          |         |
|---------------------|----------|---------|
| ACBD3               | 7.34E-07 | 1.62782 |
| ZNF592              | 1.97E-05 | 1.62791 |
| SAR1B               | 1.32E-07 | 1.62844 |
| GRINA               | 8.75E-06 | 1.62874 |
| CCNG2               | 7.51E-06 | 1.62881 |
| MGC33894            | 0.00533  | 1.62924 |
| FLJ41603            | 0.00822  | 1.62997 |
| APBB2               | 6.57E-06 | 1.63091 |
| SUB1                | 2.84E-05 | 1.63196 |
| WBSCR18             | 3.07E-05 | 1.63213 |
| SRPRB               | 3.21E-05 | 1.63216 |
| APBB2               | 2.02E-07 | 1.63219 |
| ZNF654              | 0.00022  | 1.63223 |
| RAB11FIP3           | 2.59E-05 | 1.63247 |
| MIA3                | 0.00041  | 1.63249 |
| TAOK3               | 4.18E-06 | 1.63279 |
| KLF5                | 1.75E-05 | 1.63306 |
| ---                 | 4.63E-06 | 1.63338 |
| KIAA0020            | 1.03E-05 | 1.63355 |
| B9D1                | 0.00584  | 1.63403 |
| SLC26A2             | 6.32E-06 | 1.63431 |
| YIPF5               | 2.19E-05 | 1.63435 |
| EDN1                | 0.01101  | 1.63498 |
| CCNL1               | 2.75E-07 | 1.63543 |
| C17orf39            | 0.00068  | 1.636   |
| FAM44B              | 1.41E-07 | 1.63664 |
| COMMD10             | 7.34E-05 | 1.637   |
| LST1                | 0.02827  | 1.63749 |
| LDHD                | 0.00911  | 1.63757 |
| HLA-G               | 6.04E-05 | 1.63758 |
| PRRC1               | 5.18E-06 | 1.63826 |
| CHD2                | 2.02E-05 | 1.63834 |
| JOSD3               | 1.50E-06 | 1.63856 |
| OGFR                | 7.27E-06 | 1.64057 |
| P2RX2               | 0.00035  | 1.64063 |
| ITPKC               | 0.00035  | 1.64075 |
| ---                 | 0.00063  | 1.64093 |
| JTV1                | 3.04E-06 | 1.64118 |
| WWP1                | 1.16E-06 | 1.64118 |
| PMM2                | 2.38E-06 | 1.64149 |
| FAM46A              | 9.08E-07 | 1.64151 |
| 33072 /// LOC729991 | 2.30E-05 | 1.64211 |
| RHOQ                | 0.00083  | 1.64211 |
| A16L21.2.1 /// GNG1 | 0.00101  | 1.64245 |
| N4BP1               | 8.38E-06 | 1.64363 |
| LIFR                | 0.01431  | 1.64395 |
| CEBPG               | 8.19E-07 | 1.64478 |
| KIAA1217            | 0.02739  | 1.6449  |
| FJX1                | 0.01591  | 1.64494 |

|            |          |         |
|------------|----------|---------|
| BTN3A3     | 0.00078  | 1.64505 |
| IDI1       | 2.48E-07 | 1.64543 |
| HCCS       | 2.64E-06 | 1.64556 |
| SPANXC     | 4.71E-05 | 1.64575 |
| ZDHHC7     | 3.78E-09 | 1.64612 |
| SEC23A     | 1.06E-06 | 1.64728 |
| C8orf4     | 0.0215   | 1.64739 |
| LONRF1     | 2.05E-07 | 1.6477  |
| FBXL5      | 0.00036  | 1.6478  |
| DUSP1      | 9.08E-05 | 1.64791 |
| GRB2       | 4.70E-10 | 1.64798 |
| TMEM49     | 4.71E-07 | 1.64821 |
| RQCD1      | 0.00257  | 1.64842 |
| NDUFA6     | 9.60E-08 | 1.64858 |
| C2orf60    | 8.73E-05 | 1.64886 |
| LMCD1      | 0.07034  | 1.64887 |
| TMEM63A    | 3.53E-05 | 1.64915 |
| KIAA0494   | 6.16E-07 | 1.64973 |
| SERINC1    | 9.66E-05 | 1.64992 |
| NFE2L1     | 6.07E-06 | 1.65006 |
| ANAPC1     | 5.72E-07 | 1.65033 |
| KITLG      | 0.00044  | 1.65046 |
| TBC1D9     | 6.36E-06 | 1.65069 |
| CREB3      | 1.81E-06 | 1.65113 |
| ETF1       | 2.97E-08 | 1.6516  |
| MIA3       | 0.00019  | 1.65161 |
| ALAS1      | 3.27E-05 | 1.65187 |
| SLC29A2    | 3.40E-05 | 1.65215 |
| MCOLN2     | 0.03383  | 1.6527  |
| ---        | 2.16E-05 | 1.65311 |
| GABARAPL1  | 0.00811  | 1.65319 |
| HHEX       | 0.00467  | 1.65387 |
| LAMA5      | 0.00434  | 1.6543  |
| ---        | 0.00136  | 1.65538 |
| ---        | 6.66E-05 | 1.65599 |
| FTL        | 3.98E-08 | 1.656   |
| CDYL       | 5.08E-07 | 1.65623 |
| CLCN7      | 3.13E-06 | 1.6566  |
| CALU       | 5.34E-07 | 1.65683 |
| ---        | 0.05518  | 1.65686 |
| MAP3K9     | 0.0046   | 1.65751 |
| EGLN2      | 5.36E-07 | 1.65818 |
| GADD45GIP1 | 1.70E-05 | 1.65832 |
| ---        | 1.21E-05 | 1.66061 |
| SPOPL      | 2.06E-06 | 1.66198 |
| CARS       | 1.94E-06 | 1.66241 |
| FLJ40142   | 0.00023  | 1.66249 |
| ITPR1      | 0.11033  | 1.66263 |
| DDHD1      | 2.64E-07 | 1.66281 |



|                        |          |         |
|------------------------|----------|---------|
| IDI1                   | 5.28E-07 | 1.66282 |
| ---                    | 1.03E-05 | 1.66333 |
| ARHGAP12               | 1.89E-06 | 1.66336 |
| ECH1                   | 8.55E-06 | 1.66362 |
| EIF2C4                 | 3.48E-09 | 1.66411 |
| CYP4Z2P                | 0.0048   | 1.66421 |
| PEX13                  | 0.00047  | 1.66427 |
| NAPG                   | 1.28E-05 | 1.66427 |
| SPOPL                  | 7.86E-10 | 1.66447 |
| TMED4                  | 0.00025  | 1.66463 |
| SYTL2                  | 2.34E-06 | 1.66463 |
| BCOR                   | 0.00046  | 1.66477 |
| LYRM4                  | 0.00015  | 1.66484 |
| SLC25A26               | 2.16E-05 | 1.66511 |
| ---                    | 2.64E-06 | 1.66547 |
| FOXO3                  | 1.15E-07 | 1.66559 |
| SOAT1                  | 0.00132  | 1.66639 |
| ELF5                   | 0.00195  | 1.66703 |
| GGPS1                  | 0.00167  | 1.66803 |
| PFKFB3                 | 1.43E-05 | 1.66811 |
| UTX                    | 0.00019  | 1.66812 |
| FXR1                   | 4.30E-06 | 1.66935 |
| C7orf53                | 0.00229  | 1.67066 |
| DUSP16                 | 4.95E-06 | 1.67094 |
| LOC100132990           | 0.00023  | 1.67094 |
| PVT1                   | 1.71E-05 | 1.67106 |
| CPD                    | 0.00678  | 1.67139 |
| TRAPPC5                | 5.08E-06 | 1.67194 |
| WNT4                   | 9.05E-05 | 1.67218 |
| ---                    | 0.00094  | 1.67229 |
| MSI2                   | 9.59E-05 | 1.67242 |
| CYLD                   | 0.01813  | 1.6733  |
| DAPK3                  | 1.94E-05 | 1.67341 |
| PIM3                   | 1.90E-07 | 1.67378 |
| LOC144481              | 0.00601  | 1.67408 |
| BXDC1                  | 1.29E-07 | 1.67433 |
| M189-UBE2V1 /// UBE2V1 | 1.96E-06 | 1.67458 |
| THTPA                  | 0.00026  | 1.67481 |
| YPEL2                  | 5.34E-07 | 1.67515 |
| RHBDD3                 | 0.00014  | 1.67533 |
| OSGIN1                 | 1.16E-05 | 1.67594 |
| USP31                  | 0.0002   | 1.67594 |
| LARP4                  | 0.0267   | 1.67612 |
| TBC1D4                 | 0.00014  | 1.67673 |
| DUSP16                 | 0.00024  | 1.67761 |
| HSPA1A /// HSPA1B      | 3.63E-05 | 1.6778  |
| M1 /// CALM2 /// CALM2 | 3.26E-06 | 1.67782 |
| JTV1                   | 8.07E-10 | 1.67791 |
| FOXJ3                  | 0.00149  | 1.67856 |

|               |          |         |
|---------------|----------|---------|
| JMJD2B        | 1.33E-08 | 1.67934 |
| NLN           | 0.0006   | 1.67976 |
| PHACTR2       | 0.00338  | 1.67992 |
| ---           | 0.01193  | 1.68029 |
| PDXK          | 2.93E-06 | 1.68064 |
| C1orf156      | 3.82E-06 | 1.68083 |
| PDXK          | 8.92E-07 | 1.68086 |
| DNAJC12       | 0.00248  | 1.68205 |
| EIF5          | 2.03E-07 | 1.68238 |
| EGLN1         | 1.07E-05 | 1.6832  |
| ZMYM5         | 0.00024  | 1.68343 |
| ---           | 3.72E-06 | 1.68347 |
| ITCH          | 4.16E-05 | 1.6836  |
| ---           | 5.40E-05 | 1.68431 |
| CDC37L1       | 2.12E-06 | 1.68441 |
| KIAA1217      | 0.00019  | 1.68499 |
| PAK2          | 5.63E-08 | 1.68515 |
| HSPA4L        | 2.31E-06 | 1.68551 |
| CBR3          | 1.38E-05 | 1.68614 |
| BCAS3         | 5.80E-08 | 1.68619 |
| BRI3          | 1.17E-06 | 1.68638 |
| FFAR2         | 0.00251  | 1.68654 |
| ZNF174        | 0.00578  | 1.68666 |
| BCOR          | 2.63E-05 | 1.68673 |
| MED8          | 3.25E-05 | 1.68678 |
| C7orf42       | 1.31E-05 | 1.68687 |
| PSPC1         | 3.39E-06 | 1.68868 |
| MLSTD1        | 9.52E-06 | 1.68936 |
| C2orf27       | 3.66E-05 | 1.68939 |
| PHACTR2       | 0.00238  | 1.69004 |
| ---           | 5.66E-05 | 1.6903  |
| GLRX          | 0.00213  | 1.69093 |
| LOC100131989  | 0.02936  | 1.69098 |
| LOC286167     | 0.00281  | 1.69154 |
| RP11-529I10.4 | 7.45E-06 | 1.69155 |
| INADL         | 0.00835  | 1.69215 |
| TAX1BP1       | 9.48E-07 | 1.69294 |
| SELI          | 9.82E-07 | 1.69338 |
| TAPBP         | 0.00182  | 1.6935  |
| C8orf38       | 1.89E-09 | 1.6936  |
| IL6ST         | 1.44E-05 | 1.69366 |
| ---           | 0.00017  | 1.69372 |
| FOXP1         | 0.01495  | 1.69383 |
| UQCR          | 0.00624  | 1.69389 |
| TMEM136       | 0.00128  | 1.69429 |
| ZNF79         | 0.00039  | 1.69468 |
| ANXA7         | 3.31E-06 | 1.69509 |
| XIAP          | 5.38E-05 | 1.69525 |
| ZNF592        | 2.68E-06 | 1.69544 |

|                   |          |         |
|-------------------|----------|---------|
| ATP6V1G1          | 2.25E-09 | 1.69576 |
| SCN1B             | 0.00012  | 1.6959  |
| ---               | 0.00039  | 1.69666 |
| DYRK2             | 7.66E-05 | 1.69693 |
| SENP2             | 5.52E-06 | 1.69739 |
| LOC729580         | 0.00011  | 1.69772 |
| ---               | 0.00054  | 1.69789 |
| BAT2D1            | 0.00022  | 1.69837 |
| GPD1L             | 2.04E-09 | 1.69917 |
| ---               | 1.93E-07 | 1.69936 |
| SUPT7L            | 0.00022  | 1.69968 |
| LONP2             | 0.00017  | 1.69975 |
| YKT6              | 9.77E-06 | 1.70006 |
| JMJD6             | 0.00035  | 1.70063 |
| GUF1              | 0.00204  | 1.70163 |
| GBP1              | 0.05654  | 1.70166 |
| PPP1R3C           | 2.55E-05 | 1.70184 |
| MAP3K13           | 0.00038  | 1.70215 |
| ACSL3             | 1.01E-05 | 1.70244 |
| SNHG8             | 1.96E-07 | 1.70322 |
| ---               | 0.00027  | 1.70325 |
| ---               | 0.01012  | 1.7037  |
| PATL1             | 1.82E-06 | 1.70393 |
| NUDT4 /// NUDT4P1 | 2.49E-06 | 1.70432 |
| TRIB3             | 7.42E-06 | 1.70456 |
| TMEM120B          | 0.00127  | 1.70476 |
| PHF20             | 0.00012  | 1.70486 |
| PPA2              | 0.00258  | 1.7051  |
| C10orf118         | 2.19E-06 | 1.70535 |
| CHMP1B            | 1.29E-05 | 1.70562 |
| SLC39A7           | 0.00016  | 1.70575 |
| STX3              | 0.00064  | 1.70612 |
| USP53             | 0.00016  | 1.70625 |
| IL6ST             | 5.45E-05 | 1.70627 |
| C14orf100         | 9.13E-07 | 1.70657 |
| SOX2              | 3.32E-05 | 1.70672 |
| ---               | 0.00752  | 1.70687 |
| LOC751071         | 6.22E-05 | 1.70701 |
| CCNYL1            | 1.69E-05 | 1.70728 |
| C15orf17          | 0.0041   | 1.70841 |
| CLIP1             | 6.36E-05 | 1.70884 |
| DVL2              | 4.76E-05 | 1.70905 |
| UBL3              | 2.54E-06 | 1.7097  |
| EME2              | 5.61E-05 | 1.71003 |
| LOC100049716      | 2.96E-06 | 1.71023 |
| KIAA0423          | 7.70E-07 | 1.71141 |
| PVT1              | 0.01109  | 1.71186 |
| TMEM62            | 1.34E-05 | 1.71247 |
| C2orf37           | 0.03533  | 1.71249 |

|                      |          |         |
|----------------------|----------|---------|
| USP25                | 0.00067  | 1.71269 |
| B3GNT4               | 0.00032  | 1.71289 |
| ---                  | 0.00898  | 1.71455 |
| GULP1                | 9.71E-05 | 1.71595 |
| CHN1                 | 6.27E-05 | 1.71607 |
| ---                  | 1.31E-06 | 1.71678 |
| DENND2D              | 1.11E-07 | 1.71779 |
| C7orf42              | 1.01E-05 | 1.71831 |
| USP25                | 1.44E-05 | 1.71848 |
| ADPRHL2              | 3.17E-07 | 1.71871 |
| DDHD1                | 0.00034  | 1.71937 |
| NR4A1                | 2.57E-05 | 1.71968 |
| HEXIM1               | 5.09E-06 | 1.72001 |
| ---                  | 0.00017  | 1.72002 |
| C16orf14             | 0.00011  | 1.72033 |
| ---                  | 0.00758  | 1.72067 |
| SLC29A2              | 0.00066  | 1.72221 |
| ---                  | 0.01405  | 1.72263 |
| SIL1                 | 2.27E-05 | 1.72365 |
| RAB39B               | 0.00036  | 1.72421 |
| ZNF91                | 5.28E-05 | 1.72424 |
| H3D /// HIST1H3E /// | 0.00202  | 1.72502 |
| CTSL1                | 1.02E-06 | 1.7251  |
| ---                  | 0.00148  | 1.72743 |
| CLTA                 | 0.00073  | 1.7275  |
| LOC284801            | 0.00569  | 1.72767 |
| COMMD10              | 2.35E-07 | 1.72781 |
| TRGC2                | 0.00536  | 1.72794 |
| DKFZp667G2110        | 2.17E-06 | 1.72797 |
| ERP27                | 0.00048  | 1.72822 |
| SPATA7               | 1.62E-05 | 1.72833 |
| ERO1L                | 9.45E-08 | 1.72855 |
| IL6ST                | 0.05623  | 1.72892 |
| SCAND2               | 0.00086  | 1.72897 |
| CLCN7                | 3.51E-07 | 1.72969 |
| ACY1                 | 4.14E-07 | 1.72981 |
| TJP1                 | 0.00017  | 1.72992 |
| CASP8                | 1.97E-05 | 1.73011 |
| SCARB1               | 0.00417  | 1.73026 |
| CNPY2                | 2.11E-07 | 1.73073 |
| NPNT                 | 5.50E-07 | 1.73087 |
| WIP1                 | 0.00019  | 1.7311  |
| ---                  | 0.00972  | 1.73114 |
| PSPC1                | 3.20E-06 | 1.73121 |
| SQSTM1               | 3.73E-09 | 1.73147 |
| ---                  | 2.03E-07 | 1.73239 |
| FOXD1                | 5.20E-07 | 1.73286 |
| ATF7IP2              | 0.00039  | 1.73289 |
| TMTC2                | 6.50E-06 | 1.73289 |

|           |          |         |
|-----------|----------|---------|
| YARS      | 5.95E-07 | 1.73326 |
| GLTSCR1   | 0.0001   | 1.73367 |
| ---       | 6.15E-05 | 1.734   |
| KIF5C     | 1.08E-05 | 1.73416 |
| ---       | 0.0003   | 1.73419 |
| ARFRP1    | 1.92E-05 | 1.73538 |
| ATP2B1    | 2.65E-06 | 1.73547 |
| OR7E37P   | 1.96E-07 | 1.7358  |
| KIF13B    | 0.00147  | 1.73611 |
| TC2N      | 2.04E-05 | 1.73613 |
| PPM1K     | 1.99E-05 | 1.73619 |
| HSPC159   | 0.00022  | 1.73716 |
| FLJ20021  | 4.97E-05 | 1.73725 |
| RCOR3     | 8.84E-05 | 1.73728 |
| TUFT1     | 8.15E-08 | 1.73773 |
| ZNF452    | 0.01378  | 1.73899 |
| PSPH      | 0.00247  | 1.73977 |
| COQ4      | 3.29E-06 | 1.74046 |
| C8orf38   | 0.00086  | 1.74052 |
| ---       | 6.75E-05 | 1.74069 |
| C1orf50   | 4.15E-08 | 1.74072 |
| TBRG1     | 0.00639  | 1.74162 |
| IRF6      | 9.08E-05 | 1.74237 |
| IL15RA    | 0.00191  | 1.74251 |
| FBXO32    | 4.83E-06 | 1.7429  |
| EIF2AK2   | 4.43E-07 | 1.74294 |
| NEK6      | 1.19E-05 | 1.74355 |
| UBLCP1    | 0.00059  | 1.74378 |
| C1orf88   | 5.36E-05 | 1.74472 |
| TRIM25    | 1.29E-07 | 1.74476 |
| KAZALD1   | 0.00118  | 1.74477 |
| ZBTB25    | 0.00051  | 1.74481 |
| SBNO2     | 0.02114  | 1.74481 |
| HIST1H1C  | 4.47E-07 | 1.74489 |
| ---       | 2.26E-07 | 1.74507 |
| ---       | 0.00019  | 1.74508 |
| MGC24039  | 0.00898  | 1.74576 |
| RAD50     | 0.00036  | 1.74577 |
| KLHL21    | 2.51E-05 | 1.74605 |
| TMTC2     | 3.01E-05 | 1.74606 |
| ---       | 0.00255  | 1.74609 |
| C14orf122 | 3.42E-06 | 1.74619 |
| KIAA1429  | 0.00673  | 1.74657 |
| NFKBIB    | 7.49E-05 | 1.74685 |
| B2M       | 1.48E-09 | 1.74686 |
| PTBP2     | 4.38E-05 | 1.74715 |
| SCML1     | 5.26E-07 | 1.74726 |
| RPS6KA5   | 3.38E-07 | 1.74734 |
| DST       | 0.00157  | 1.74816 |

|                       |          |         |
|-----------------------|----------|---------|
| FAM139A               | 0.00016  | 1.74894 |
| TSC22D2               | 2.77E-07 | 1.74991 |
| ZNF561                | 0.00022  | 1.75038 |
| MKLN1                 | 4.75E-05 | 1.75098 |
| ZGPAT                 | 5.52E-08 | 1.75139 |
| C100128518 /// RNF2   | 5.67E-05 | 1.75198 |
| EML2                  | 0.00192  | 1.75211 |
| ALDOC                 | 1.86E-07 | 1.75305 |
| PRPF40B               | 1.24E-05 | 1.7531  |
| ANKRD12               | 9.53E-05 | 1.7538  |
| USP25                 | 0.02044  | 1.75388 |
| ARL8B                 | 1.15E-08 | 1.7539  |
| GALC                  | 6.10E-09 | 1.75398 |
| PAWR                  | 2.29E-05 | 1.75464 |
| ACLY                  | 2.01E-07 | 1.756   |
| TARS                  | 1.28E-07 | 1.75601 |
| C1orf149              | 3.81E-08 | 1.75601 |
| ---                   | 0.00747  | 1.75644 |
| ---                   | 2.05E-05 | 1.75658 |
| C1orf71               | 7.88E-06 | 1.75682 |
| PBX1                  | 0.00077  | 1.75697 |
| POLI                  | 8.40E-05 | 1.75711 |
| AKAP8L                | 1.44E-05 | 1.75753 |
| TMEM141               | 1.70E-05 | 1.7584  |
| METTL1                | 2.93E-06 | 1.75859 |
| EIF2AK1               | 0.00307  | 1.75861 |
| EIF5                  | 7.22E-09 | 1.75889 |
| TSC22D2               | 1.74E-05 | 1.75913 |
| PRSS8                 | 3.08E-06 | 1.75975 |
| RRS1                  | 3.60E-06 | 1.75975 |
| C1orf25               | 0.0028   | 1.75998 |
| CAMK2D                | 2.85E-08 | 1.7601  |
| MXI1                  | 1.43E-07 | 1.76149 |
| SLC9A7                | 0.0005   | 1.76183 |
| FAM84A                | 6.83E-06 | 1.7619  |
| IRF5                  | 0.00102  | 1.76195 |
| RC3H2                 | 0.0012   | 1.76215 |
| LPIN2                 | 3.10E-05 | 1.76285 |
| AHR                   | 0.00026  | 1.76309 |
| F2RL1                 | 0.00082  | 1.76337 |
| ITGB5                 | 3.84E-07 | 1.76396 |
| WWC1                  | 0.00024  | 1.76406 |
| ZGPAT                 | 9.66E-07 | 1.76406 |
| KIAA0494              | 0.00013  | 1.76426 |
| SCD                   | 2.90E-08 | 1.76484 |
| TP53INP1              | 4.87E-07 | 1.76498 |
| GPC4                  | 0.00067  | 1.76507 |
| PD5 /// RGPLD6 /// RG | 2.77E-06 | 1.76521 |
| STX17                 | 4.01E-06 | 1.76596 |

|                       |          |         |
|-----------------------|----------|---------|
| FHL2                  | 0.02815  | 1.76603 |
| NARF                  | 9.53E-07 | 1.76623 |
| EPB41L5               | 9.12E-05 | 1.76663 |
| GNA13                 | 5.62E-05 | 1.76689 |
| PPP1R2                | 2.07E-06 | 1.76708 |
| I8P /// OR7E35P /// C | 3.64E-07 | 1.76731 |
| FAM110B               | 0.01807  | 1.7675  |
| PSTPIP2               | 0.00249  | 1.76753 |
| SNX8                  | 1.35E-06 | 1.76778 |
| CXADR                 | 0.00023  | 1.76835 |
| EHD4                  | 1.85E-05 | 1.76839 |
| ARID5B                | 2.90E-08 | 1.7685  |
| VEGFA                 | 1.97E-05 | 1.76897 |
| GOSR2                 | 9.69E-07 | 1.76925 |
| RPS6KA5               | 0.00015  | 1.77004 |
| LGALS8                | 3.30E-08 | 1.77023 |
| GOSR2                 | 3.20E-07 | 1.77086 |
| FUT8                  | 1.43E-06 | 1.77164 |
| RNF146                | 5.45E-08 | 1.77169 |
| ORMDL3                | 6.66E-05 | 1.77225 |
| CGREF1                | 7.67E-09 | 1.77246 |
| UBFD1                 | 9.56E-08 | 1.77254 |
| NEU1                  | 1.27E-08 | 1.77295 |
| ---                   | 4.90E-05 | 1.77338 |
| B4GALT7               | 0.00059  | 1.77379 |
| SENP2                 | 2.56E-07 | 1.77394 |
| CYB5R4                | 4.37E-07 | 1.77469 |
| ENC1                  | 3.57E-05 | 1.77531 |
| SSSCA1                | 6.67E-06 | 1.77612 |
| PAK2                  | 2.16E-07 | 1.77644 |
| FDFT1                 | 1.69E-08 | 1.77645 |
| Magma                 | 5.82E-07 | 1.77658 |
| RP11-529I10.4         | 2.90E-06 | 1.77721 |
| RIOK3                 | 1.44E-05 | 1.77744 |
| KIAA0241              | 2.95E-05 | 1.77799 |
| BCKDHB                | 7.52E-05 | 1.77839 |
| CIQTNF6               | 2.31E-07 | 1.77847 |
| YIPF2                 | 2.05E-07 | 1.77914 |
| C16orf14              | 2.26E-08 | 1.77955 |
| IL6                   | 0.02208  | 1.78041 |
| USP31                 | 0.00185  | 1.78041 |
| SFTPA2 /// SFTPA2B    | 0.00829  | 1.78074 |
| TBC1D20               | 2.99E-05 | 1.78132 |
| ATRIP /// TREX1       | 8.48E-06 | 1.78195 |
| AKR1A1                | 4.01E-08 | 1.782   |
| JUNB                  | 2.00E-07 | 1.78211 |
| INTS12                | 1.12E-07 | 1.78279 |
| C6orf166              | 0.00824  | 1.78283 |
| PSME4                 | 1.66E-05 | 1.78379 |

|                    |          |         |
|--------------------|----------|---------|
| HINT3              | 1.35E-06 | 1.78551 |
| LOC649851 /// MYL5 | 1.18E-07 | 1.78629 |
| AKR1CL2            | 0.00159  | 1.78642 |
| RASD1              | 0.00012  | 1.78652 |
| TMEM129            | 4.77E-05 | 1.78653 |
| METAP2             | 1.29E-05 | 1.78746 |
| TC2N               | 0.00022  | 1.78788 |
| THSD4              | 0.01783  | 1.78805 |
| MAP4K4             | 2.24E-05 | 1.78829 |
| IMPAD1             | 4.17E-06 | 1.78833 |
| NPNT               | 0.00766  | 1.78881 |
| BACH1              | 2.24E-07 | 1.7889  |
| SELT               | 2.02E-05 | 1.78893 |
| FNDC3B             | 0.00114  | 1.78902 |
| TMEM116            | 2.00E-06 | 1.78904 |
| HMGCS1             | 9.79E-06 | 1.78967 |
| ---                | 0.00153  | 1.78969 |
| LOC283861          | 0.00049  | 1.78973 |
| KLK12              | 0.00966  | 1.79041 |
| ERICH1             | 0.00018  | 1.79178 |
| ELF3               | 0.00041  | 1.79193 |
| PNKD               | 5.35E-07 | 1.79217 |
| INSR               | 0.0002   | 1.79402 |
| PGRMC2             | 0.00049  | 1.79427 |
| PTRH2              | 1.17E-12 | 1.79448 |
| LOC388796          | 7.49E-07 | 1.79453 |
| CFLAR              | 3.57E-07 | 1.79459 |
| C1orf25            | 0.00011  | 1.79501 |
| ABAT               | 8.71E-05 | 1.79582 |
| C6orf166           | 2.37E-06 | 1.79729 |
| RP11-49G10.8       | 0.00614  | 1.79778 |
| ---                | 1.64E-05 | 1.79784 |
| STX7               | 5.44E-05 | 1.79812 |
| EMG1               | 2.00E-07 | 1.79845 |
| CCDC57             | 1.59E-05 | 1.79933 |
| KIAA0265           | 0.00088  | 1.80042 |
| PHF10              | 5.41E-05 | 1.80042 |
| MAPK8              | 3.74E-05 | 1.80089 |
| HIVEP2             | 0.00383  | 1.80119 |
| DHDDS              | 0.00023  | 1.80136 |
| DNAJC16            | 0.00028  | 1.80245 |
| RAB21              | 9.14E-06 | 1.80259 |
| NEK8               | 2.10E-06 | 1.8034  |
| LOC728769          | 2.48E-06 | 1.80373 |
| TM7SF2             | 6.95E-07 | 1.80538 |
| FOXO1              | 6.29E-06 | 1.80541 |
| LAP3               | 5.16E-06 | 1.80613 |
| BRAP               | 0.00757  | 1.80739 |
| DTNA               | 9.38E-07 | 1.80822 |



|                   |          |         |
|-------------------|----------|---------|
| EME2              | 2.60E-05 | 1.80852 |
| FAM3C             | 2.90E-05 | 1.80864 |
| CYR61             | 0.00233  | 1.80904 |
| ELOVL5            | 1.05E-06 | 1.80934 |
| KPNA6             | 8.08E-06 | 1.80937 |
| ---               | 0.00627  | 1.8101  |
| PRPF40A           | 1.95E-05 | 1.81165 |
| WDR89             | 1.07E-06 | 1.81219 |
| SYNJ2             | 8.85E-06 | 1.8125  |
| LOC493869         | 8.94E-07 | 1.8128  |
| GDAP1             | 0.0001   | 1.81294 |
| SMEK1             | 1.33E-05 | 1.81345 |
| ARL4C             | 0.00146  | 1.81348 |
| LOC389765         | 9.00E-06 | 1.81379 |
| RNFT1             | 7.13E-05 | 1.81411 |
| LOC729345         | 0.00111  | 1.81457 |
| PSME1             | 1.90E-06 | 1.81483 |
| SYT7              | 0.00264  | 1.81728 |
| USP32             | 1.12E-06 | 1.81764 |
| C10orf118         | 0.00123  | 1.8178  |
| FLJ22167          | 0.00061  | 1.81922 |
| HK2               | 4.64E-13 | 1.81923 |
| CKAP4             | 4.51E-08 | 1.82019 |
| MRPS15            | 0.00684  | 1.82019 |
| FAM46A            | 3.85E-06 | 1.82214 |
| POLR2L            | 0.00054  | 1.82428 |
| PAK2              | 3.55E-06 | 1.82459 |
| KLF5              | 2.11E-06 | 1.82508 |
| IMPAD1            | 1.12E-07 | 1.82519 |
| TMEM189 /// UBE2V | 9.79E-10 | 1.8253  |
| IFITM3            | 1.24E-09 | 1.82564 |
| SIAH2             | 8.94E-08 | 1.82589 |
| KDELC2            | 0.00011  | 1.82643 |
| YPEL2             | 0.00062  | 1.82739 |
| CLIP1             | 5.34E-05 | 1.82768 |
| AMOTL2            | 3.97E-08 | 1.82893 |
| CTSC              | 8.09E-06 | 1.82913 |
| FLJ33630          | 6.36E-05 | 1.8293  |
| LATS2             | 5.08E-07 | 1.83023 |
| PFDN6             | 1.11E-05 | 1.83046 |
| SLC35A1           | 2.18E-08 | 1.83142 |
| ---               | 0.0012   | 1.83201 |
| SOX4              | 2.01E-06 | 1.83243 |
| ---               | 0.0286   | 1.83249 |
| KLF7              | 0.00217  | 1.83253 |
| PDK1              | 2.70E-06 | 1.83296 |
| RNFT1             | 6.33E-08 | 1.83329 |
| DLC1              | 3.10E-07 | 1.83363 |
| HMGCS1            | 3.03E-07 | 1.83381 |

|                       |          |         |
|-----------------------|----------|---------|
| CTSC                  | 0.00128  | 1.8339  |
| ---                   | 0.00162  | 1.83454 |
| SC4MOL                | 4.10E-06 | 1.83511 |
| TRIM16                | 1.05E-07 | 1.83566 |
| LOC100133130          | 9.42E-08 | 1.83582 |
| ---                   | 0.00303  | 1.83706 |
| FNDC3B                | 1.03E-08 | 1.83728 |
| FLJ20323              | 2.65E-06 | 1.83781 |
| SOCS2                 | 8.38E-07 | 1.83859 |
| WDR89                 | 4.84E-06 | 1.83977 |
| SH2D3A                | 8.53E-05 | 1.84019 |
| IRF2BP2               | 7.29E-06 | 1.84089 |
| CHMP5                 | 4.90E-07 | 1.84191 |
| DNAJB4                | 0.00012  | 1.8421  |
| ATP11B                | 0.00101  | 1.84223 |
| SQSTM1                | 0.00016  | 1.84351 |
| C18orf25              | 0.00487  | 1.84398 |
| RIT1                  | 8.19E-10 | 1.84452 |
| MFSD8                 | 4.99E-07 | 1.84483 |
| M189-UBE2V1 /// UB    | 5.98E-08 | 1.84497 |
| SOX4                  | 3.91E-05 | 1.84502 |
| ZCCHC2                | 0.00016  | 1.84526 |
| CFLAR                 | 5.37E-07 | 1.84529 |
| LMO3                  | 0.00143  | 1.84596 |
| CHST12                | 1.28E-06 | 1.84705 |
| KIAA1530              | 0.00022  | 1.84756 |
| C6orf166              | 9.07E-08 | 1.84775 |
| PML                   | 8.32E-05 | 1.84781 |
| PAK2                  | 3.15E-07 | 1.8489  |
| E /// HIST1H2BF /// I | 6.03E-07 | 1.84902 |
| CCDC78                | 1.82E-06 | 1.84931 |
| IRS2                  | 0.0001   | 1.85005 |
| MARS                  | 1.38E-07 | 1.8502  |
| VEGFA                 | 1.00E-08 | 1.85037 |
| FUT8                  | 1.81E-08 | 1.85052 |
| MALAT1                | 1.02E-06 | 1.85082 |
| ATP2C1                | 4.45E-06 | 1.85152 |
| TERF2IP               | 4.32E-07 | 1.85164 |
| RAP2B                 | 6.18E-07 | 1.85181 |
| GRAMD1A               | 7.46E-06 | 1.85253 |
| PHKA1                 | 4.97E-07 | 1.85267 |
| ARMCX5                | 1.27E-08 | 1.85273 |
| DNAJB9                | 1.65E-06 | 1.85352 |
| NEK6                  | 7.12E-06 | 1.85446 |
| RGAG4                 | 0.00016  | 1.8551  |
| IL6ST                 | 0.00159  | 1.85711 |
| hCG_1985469           | 8.25E-05 | 1.85821 |
| CDYL2                 | 0.00518  | 1.85852 |
| SOX4                  | 2.50E-05 | 1.86011 |

|                     |          |         |
|---------------------|----------|---------|
| PHF20L1             | 0.00035  | 1.86012 |
| IRF2BP2             | 3.02E-05 | 1.86092 |
| DAPK3               | 0.00033  | 1.86099 |
| C22orf16            | 4.39E-07 | 1.86129 |
| DLC1                | 0.00011  | 1.86181 |
| SNX16               | 0.00053  | 1.86218 |
| C8orf46             | 0.00084  | 1.86234 |
| PIP                 | 1.24E-06 | 1.86399 |
| WDFY2               | 6.39E-06 | 1.86424 |
| C4orf32             | 4.18E-06 | 1.86481 |
| RORA                | 0.00145  | 1.86574 |
| PAWR                | 2.71E-05 | 1.86625 |
| RP11-151A6.2        | 1.07E-09 | 1.86646 |
| PML                 | 5.85E-05 | 1.86678 |
| ZNF697              | 0.00021  | 1.86838 |
| DIAPH2              | 4.87E-08 | 1.87204 |
| FOXP1               | 1.29E-05 | 1.87216 |
| FLJ41278 /// TBC1D3 | 4.91E-05 | 1.87234 |
| CITED2              | 2.74E-06 | 1.87296 |
| LIMCH1              | 0.00427  | 1.87313 |
| RORA                | 0.00022  | 1.87317 |
| C6orf204            | 3.54E-07 | 1.87352 |
| WWP1                | 0.00031  | 1.87357 |
| ATP2C2              | 1.87E-06 | 1.87622 |
| PMAIP1              | 4.74E-07 | 1.87658 |
| TSPYL4              | 5.23E-07 | 1.87725 |
| PPP1R3E             | 1.03E-05 | 1.87745 |
| C6orf1              | 1.08E-06 | 1.87747 |
| HTT                 | 3.61E-06 | 1.87761 |
| SEPP1               | 1.25E-05 | 1.87848 |
| AGA                 | 0.00013  | 1.87862 |
| CLCN6               | 8.32E-06 | 1.87947 |
| CCPG1               | 0.00201  | 1.87955 |
| KITLG               | 3.91E-05 | 1.87957 |
| PSMB10              | 4.77E-07 | 1.87988 |
| C1orf149            | 6.14E-06 | 1.88016 |
| CCNG2               | 3.63E-09 | 1.88039 |
| SGTB                | 0.00072  | 1.88089 |
| KLHDC7B             | 4.83E-06 | 1.88105 |
| YIPF2               | 5.43E-06 | 1.88146 |
| HCCS                | 3.73E-05 | 1.88221 |
| TMEM198             | 3.31E-06 | 1.88279 |
| WASF3               | 5.23E-06 | 1.88367 |
| TGFBR2              | 1.12E-06 | 1.88535 |
| MAP1LC3B            | 5.23E-10 | 1.88539 |
| MLKL                | 6.91E-05 | 1.88573 |
| PPP1R3E             | 3.16E-05 | 1.88581 |
| RNASEH2C            | 5.72E-08 | 1.88669 |
| LOC440944           | 0.00012  | 1.88693 |

|           |          |         |
|-----------|----------|---------|
| LOC400451 | 7.22E-07 | 1.88825 |
| MAGED1    | 1.96E-07 | 1.88862 |
| NAPA      | 3.27E-06 | 1.88871 |
| KCNK6     | 1.31E-08 | 1.88949 |
| NR3C1     | 1.55E-06 | 1.8895  |
| VLDLR     | 9.85E-06 | 1.89107 |
| PFDN6     | 6.35E-06 | 1.89142 |
| LOC541469 | 3.90E-08 | 1.8924  |
| HIST3H2A  | 1.89E-07 | 1.89277 |
| SCARB1    | 1.87E-08 | 1.89358 |
| SGPP2     | 3.55E-05 | 1.8938  |
| MARS      | 2.65E-07 | 1.8944  |
| OVOL1     | 4.11E-08 | 1.89476 |
| APOLD1    | 0.00884  | 1.89504 |
| ---       | 2.75E-05 | 1.89547 |
| MED8      | 1.12E-05 | 1.89559 |
| ---       | 1.42E-05 | 1.89622 |
| LOC388796 | 1.23E-06 | 1.8974  |
| HLA-G     | 3.87E-06 | 1.89814 |
| ---       | 0.00666  | 1.89932 |
| CLK4      | 2.52E-05 | 1.89997 |
| MBNL3     | 8.82E-05 | 1.90011 |
| YPEL5     | 8.41E-08 | 1.90031 |
| UBLCP1    | 3.18E-07 | 1.90304 |
| C1orf71   | 0.00657  | 1.90359 |
| EPHA3     | 0.00045  | 1.90364 |
| LOC154761 | 0.00061  | 1.90474 |
| KIAA0513  | 0.00023  | 1.90532 |
| CXCL10    | 0.00023  | 1.90554 |
| CISH      | 9.13E-05 | 1.90566 |
| ZHX2      | 2.22E-09 | 1.90591 |
| P2RX4     | 1.62E-08 | 1.90683 |
| ASAH1     | 4.03E-07 | 1.9074  |
| KIAA1217  | 0.00028  | 1.90778 |
| NUDT13    | 6.68E-05 | 1.90792 |
| IL1RAP    | 0.00159  | 1.90799 |
| ---       | 0.00017  | 1.90855 |
| FAM114A1  | 2.04E-07 | 1.90913 |
| ARL5B     | 2.61E-05 | 1.90916 |
| CKAP4     | 5.14E-10 | 1.91092 |
| ---       | 0.00047  | 1.91137 |
| ---       | 3.32E-06 | 1.91159 |
| TNFRSF10A | 0.00411  | 1.91259 |
| BTG3      | 0.00011  | 1.91433 |
| PTRH1     | 2.64E-06 | 1.91483 |
| SLC30A1   | 0.00035  | 1.91489 |
| PHLDA1    | 0.01095  | 1.91537 |
| SLC25A45  | 0.00155  | 1.91606 |
| CA4       | 2.20E-07 | 1.91666 |

|              |          |         |
|--------------|----------|---------|
| IRS2         | 4.11E-08 | 1.9183  |
| PGS1         | 3.04E-08 | 1.91855 |
| MPPED2       | 0.00351  | 1.91875 |
| HLA-A        | 7.11E-08 | 1.91893 |
| C15orf17     | 3.29E-05 | 1.92014 |
| ---          | 1.14E-07 | 1.92293 |
| ---          | 7.88E-06 | 1.92294 |
| MINA         | 1.96E-07 | 1.92306 |
| C1orf51      | 4.98E-06 | 1.92349 |
| STAG3L4      | 5.46E-06 | 1.92427 |
| VEGFA        | 2.43E-05 | 1.92438 |
| ---          | 0.00184  | 1.92564 |
| CHPF         | 1.92E-05 | 1.92714 |
| MAP1LC3B     | 1.21E-09 | 1.92715 |
| RAB20        | 8.93E-10 | 1.92736 |
| ARRB1        | 9.82E-07 | 1.92737 |
| CAB39        | 1.41E-07 | 1.92744 |
| ---          | 1.13E-06 | 1.92794 |
| ATP6V1E1     | 1.45E-06 | 1.92844 |
| INSIG1       | 5.47E-09 | 1.9296  |
| SRGAP1       | 1.56E-06 | 1.93125 |
| GRB10        | 4.40E-05 | 1.93136 |
| FAM118A      | 0.00167  | 1.93175 |
| SRGAP1       | 2.67E-07 | 1.93317 |
| RAB32        | 0.00096  | 1.93344 |
| DTNA         | 0.00076  | 1.93419 |
| ZNF277       | 1.41E-06 | 1.93444 |
| PSME2        | 1.06E-07 | 1.93451 |
| TMEM135      | 2.08E-06 | 1.93505 |
| SULT2B1      | 8.23E-05 | 1.9369  |
| TNFRSF21     | 1.52E-05 | 1.9373  |
| MVK          | 0.00078  | 1.93847 |
| FKBP11       | 3.84E-08 | 1.93855 |
| TLCD1        | 1.81E-07 | 1.93894 |
| JAG1         | 1.16E-05 | 1.93906 |
| JMJD2C       | 9.73E-05 | 1.93974 |
| IFRD1        | 4.40E-06 | 1.93998 |
| GALNTL4      | 0.00091  | 1.93999 |
| SCARB1       | 5.10E-06 | 1.94021 |
| ---          | 0.01972  | 1.94148 |
| ACSL3        | 1.55E-08 | 1.94228 |
| OVOL2        | 0.00027  | 1.94457 |
| EHD4         | 5.45E-06 | 1.94535 |
| PGM3         | 4.00E-06 | 1.94543 |
| FLJ20323     | 4.14E-06 | 1.94593 |
| CCPG1        | 2.71E-06 | 1.94896 |
| VEGFA        | 0.00033  | 1.94974 |
| PUNC         | 0.00011  | 1.95027 |
| LOC100009676 | 0.01536  | 1.95177 |

|                       |          |         |
|-----------------------|----------|---------|
| ---                   | 5.53E-05 | 1.95502 |
| ACOT1 /// ACOT2       | 6.05E-08 | 1.95526 |
| CITED2                | 4.92E-07 | 1.95549 |
| E /// HIST1H2BF /// I | 7.92E-06 | 1.95681 |
| NFE2L3                | 1.26E-05 | 1.95756 |
| CIDEC                 | 1.17E-06 | 1.95791 |
| NKIRAS1               | 0.00045  | 1.95813 |
| BMF                   | 2.67E-05 | 1.95843 |
| JUN                   | 0.00194  | 1.95867 |
| SYTL2                 | 1.29E-05 | 1.95902 |
| OC442497 /// SLC3A    | 2.96E-09 | 1.95937 |
| CXYorf10              | 1.92E-05 | 1.95957 |
| YIPF6                 | 7.94E-09 | 1.95977 |
| ---                   | 0.00122  | 1.95984 |
| NEDD4                 | 5.70E-07 | 1.96065 |
| CISH                  | 5.50E-06 | 1.96101 |
| SNAPC1                | 2.52E-05 | 1.96104 |
| TAP2                  | 0.00708  | 1.96178 |
| ECE1                  | 1.21E-06 | 1.96193 |
| MCFD2                 | 8.17E-07 | 1.9621  |
| CAB39L                | 5.04E-07 | 1.96213 |
| IRF9                  | 2.37E-09 | 1.96296 |
| 2H2AA3 /// HIST2H1    | 1.77E-09 | 1.96346 |
| DNAJA4                | 0.00306  | 1.96593 |
| SCARB1                | 9.91E-08 | 1.96605 |
| FLJ38359              | 0.00025  | 1.96853 |
| CFL2                  | 1.41E-05 | 1.96963 |
| C3orf60               | 1.10E-07 | 1.97063 |
| CISH                  | 5.53E-08 | 1.97109 |
| NAT9                  | 6.10E-05 | 1.97268 |
| MYO1B                 | 1.30E-05 | 1.97293 |
| CHMP5                 | 0.00048  | 1.97329 |
| GPR137B               | 5.13E-07 | 1.97417 |
| LOC147727             | 7.26E-06 | 1.9742  |
| C3orf59               | 1.09E-08 | 1.97475 |
| NAPA                  | 2.88E-08 | 1.97553 |
| P2RY6                 | 1.16E-07 | 1.97575 |
| LOC400451             | 9.36E-07 | 1.97583 |
| C7orf13               | 8.93E-06 | 1.97611 |
| MFAP3                 | 2.55E-06 | 1.97643 |
| ABCD1                 | 0.00015  | 1.97749 |
| ERBB2                 | 1.07E-08 | 1.97783 |
| ---                   | 6.00E-05 | 1.97815 |
| FLJ32810              | 0.00644  | 1.97932 |
| FNDC3B                | 0.00012  | 1.98021 |
| HIST1H3D              | 3.68E-06 | 1.98354 |
| LPGAT1                | 9.74E-08 | 1.98406 |
| LACTB                 | 2.92E-05 | 1.98565 |
| SRPRB                 | 8.74E-05 | 1.98583 |

|                     |          |         |
|---------------------|----------|---------|
| ABCA11              | 7.47E-06 | 1.98596 |
| ECE1                | 2.86E-05 | 1.98658 |
| MCOLN1              | 1.05E-06 | 1.98759 |
| TRIM38              | 0.00047  | 1.98765 |
| EME2                | 6.98E-07 | 1.98877 |
| SRGAP1              | 0.00029  | 1.98986 |
| CCDC68              | 0.0006   | 1.99226 |
| C5orf26             | 1.73E-09 | 1.9928  |
| CRIM1               | 3.74E-05 | 1.99528 |
| ---                 | 8.02E-05 | 1.99549 |
| TGFBI               | 0.00442  | 1.99651 |
| NFIA                | 6.38E-05 | 1.99764 |
| TNFRSF21            | 0.00019  | 2.00226 |
| TRAFD1              | 0.00011  | 2.00494 |
| ---                 | 0.00112  | 2.00506 |
| RGS16               | 1.06E-05 | 2.00507 |
| TMEM2               | 7.13E-05 | 2.00658 |
| FDFT1               | 1.74E-09 | 2.00959 |
| PARP8               | 5.94E-08 | 2.00963 |
| WWC3                | 6.69E-06 | 2.01076 |
| ZNF342              | 4.93E-05 | 2.01186 |
| PFKFB4              | 5.09E-07 | 2.01194 |
| DUSP1               | 1.37E-10 | 2.01196 |
| EXOC6B              | 0.00081  | 2.01213 |
| ---                 | 1.71E-05 | 2.01328 |
| MAP4K4              | 2.39E-05 | 2.01338 |
| RMND5A              | 5.19E-05 | 2.01383 |
| TMEM49              | 6.32E-05 | 2.01445 |
| TIMM8B              | 2.64E-06 | 2.01452 |
| RT86 /// LOC1001343 | 0.0014   | 2.01603 |
| BTBD11              | 0.01162  | 2.0164  |
| ZNF621              | 0.00333  | 2.01715 |
| RAB24               | 1.89E-06 | 2.01877 |
| RP1-93P18.1         | 3.39E-06 | 2.01878 |
| HLA-C               | 1.18E-09 | 2.01927 |
| C1orf50             | 4.46E-06 | 2.01981 |
| LCP1                | 0.00052  | 2.02073 |
| hCG_1731871 /// LOC | 1.34E-06 | 2.02356 |
| ---                 | 5.99E-07 | 2.02367 |
| INHA                | 1.18E-07 | 2.02409 |
| SOCS2               | 3.53E-07 | 2.02417 |
| ST3GAL1             | 3.00E-07 | 2.0243  |
| DNAJB4              | 9.17E-07 | 2.02472 |
| FGF18               | 0.00032  | 2.025   |
| ERRFI1              | 8.75E-09 | 2.02525 |
| C100129068 /// ST3G | 8.25E-07 | 2.02798 |
| LOC100132999        | 5.45E-07 | 2.02807 |
| MAP1B               | 0.00279  | 2.03203 |
| RANBP2              | 1.31E-07 | 2.03261 |

|                     |          |         |
|---------------------|----------|---------|
| KIAA0415            | 4.00E-05 | 2.03314 |
| IER5                | 8.42E-08 | 2.03369 |
| NEDD4L              | 8.06E-06 | 2.03399 |
| TAPBPL              | 0.00014  | 2.03419 |
| KHDRBS1             | 0.00303  | 2.03476 |
| /// TRIM6 /// TRIM6 | 0.01594  | 2.03601 |
| HIST2H2AA3          | 9.88E-06 | 2.03657 |
| CRBN                | 5.09E-09 | 2.03742 |
| CYB5R1              | 4.58E-07 | 2.03751 |
| SAT2                | 7.19E-08 | 2.03797 |
| HERPUD1             | 2.89E-08 | 2.03882 |
| CT6AP1 /// LOC6495  | 1.54E-06 | 2.03892 |
| LOC57400            | 0.00051  | 2.03909 |
| GFER                | 6.81E-06 | 2.03966 |
| UBE2B               | 2.16E-07 | 2.0408  |
| ZMYM5               | 0.00024  | 2.04204 |
| IL29                | 2.28E-06 | 2.04261 |
| ---                 | 2.19E-06 | 2.0437  |
| IDH1                | 7.21E-09 | 2.04391 |
| ---                 | 1.92E-07 | 2.04443 |
| FAM118A             | 3.46E-06 | 2.04493 |
| MAP3K8              | 0.00022  | 2.04534 |
| C6orf60             | 0.00199  | 2.04545 |
| CEBPG               | 8.81E-08 | 2.04629 |
| HIST1H3D /// HIST1  | 0.00012  | 2.04673 |
| ---                 | 0.00026  | 2.04792 |
| C19orf63            | 3.32E-07 | 2.04893 |
| OSBPL9              | 1.51E-07 | 2.05104 |
| LOC123688           | 0.00018  | 2.05141 |
| NR3C1               | 4.89E-08 | 2.05591 |
| SLC5A6              | 3.54E-09 | 2.05634 |
| PPM1E               | 3.40E-08 | 2.05689 |
| ---                 | 0.00174  | 2.05726 |
| KLF7                | 9.56E-05 | 2.05904 |
| FGF18               | 2.71E-05 | 2.05985 |
| SCPEP1              | 1.28E-09 | 2.0612  |
| ZNF557              | 0.00064  | 2.06136 |
| RGS16               | 0.00052  | 2.06211 |
| CSGALNACT1          | 2.80E-05 | 2.06271 |
| C12orf23            | 9.18E-08 | 2.06273 |
| TRAK1               | 0.00287  | 2.0631  |
| MED8                | 2.18E-05 | 2.06481 |
| DOK3                | 0.00055  | 2.06649 |
| ATRIP /// TREX1     | 1.07E-07 | 2.06786 |
| RP1-21O18.1         | 1.92E-05 | 2.06787 |
| RP1-21O18.1         | 7.32E-07 | 2.06975 |
| ---                 | 0.00092  | 2.07086 |
| ALKBH6 /// C19orf46 | 1.02E-08 | 2.07334 |
| CRIM1               | 2.88E-07 | 2.07458 |



|                     |          |         |
|---------------------|----------|---------|
| UBE2B               | 1.10E-06 | 2.07586 |
| MITF                | 0.00249  | 2.07599 |
| ---                 | 9.32E-06 | 2.07719 |
| JMJD2B              | 1.36E-05 | 2.07721 |
| HLA-C               | 7.57E-11 | 2.07772 |
| C3orf19             | 1.27E-05 | 2.07795 |
| ---                 | 8.35E-06 | 2.07872 |
| ARMCX1              | 6.52E-06 | 2.08105 |
| C10orf75            | 3.07E-07 | 2.08121 |
| ECE2                | 1.64E-06 | 2.08135 |
| BIK                 | 2.38E-06 | 2.08405 |
| MSI2                | 1.39E-06 | 2.08416 |
| DUSP16              | 1.03E-05 | 2.08568 |
| MICA /// MICB /// X | 7.74E-10 | 2.08667 |
| SLC7A6OS            | 1.13E-07 | 2.08814 |
| TDRD7               | 9.49E-09 | 2.08954 |
| RIPK2               | 5.95E-07 | 2.08993 |
| MAFF                | 7.34E-06 | 2.09193 |
| CRB3                | 5.60E-05 | 2.09224 |
| RDH11               | 6.97E-09 | 2.09246 |
| YIF1A               | 5.75E-07 | 2.09295 |
| PUNC                | 0.00106  | 2.09445 |
| DHRS2               | 6.66E-08 | 2.09661 |
| GADD45B             | 4.75E-08 | 2.09811 |
| ---                 | 0.00038  | 2.09972 |
| HLA-G               | 8.65E-08 | 2.10043 |
| PDSS2               | 0.00011  | 2.10125 |
| OSTM1               | 0.00229  | 2.1042  |
| RPS6KA2             | 0.00034  | 2.10464 |
| TMEM104             | 0.004    | 2.10486 |
| TRAFD1              | 2.88E-07 | 2.10546 |
| UBR1                | 0.00022  | 2.10868 |
| PRNP                | 5.28E-05 | 2.11139 |
| IFRD1               | 7.60E-05 | 2.11271 |
| ---                 | 0.00095  | 2.11438 |
| CPEB2               | 3.90E-07 | 2.11798 |
| DHRS2               | 6.52E-07 | 2.11814 |
| TRIM14              | 4.41E-07 | 2.11864 |
| GIGYF2              | 1.89E-05 | 2.11946 |
| NAMPT               | 2.74E-07 | 2.12097 |
| HSPC159             | 4.94E-06 | 2.12108 |
| LRCH4               | 2.52E-06 | 2.12237 |
| CYP4B1              | 0.0019   | 2.12249 |
| HLA-G               | 3.19E-09 | 2.12373 |
| VDR                 | 7.12E-06 | 2.12535 |
| LSS                 | 5.31E-08 | 2.12596 |
| ARRDC4              | 1.07E-09 | 2.12737 |
| ZNF107              | 0.00043  | 2.12781 |
| TncRNA              | 1.14E-06 | 2.12815 |

|                  |          |         |
|------------------|----------|---------|
| LACTB2           | 6.10E-06 | 2.12914 |
| RAB39B           | 5.03E-05 | 2.12969 |
| KIAA0494         | 1.01E-07 | 2.13005 |
| HAGH             | 6.47E-07 | 2.13406 |
| JAG1             | 4.19E-06 | 2.13615 |
| MUMIL1           | 3.76E-05 | 2.13672 |
| DDHD1            | 7.86E-08 | 2.13721 |
| CEBPD            | 9.43E-11 | 2.13806 |
| HIG2             | 8.35E-10 | 2.13855 |
| C20orf134        | 3.85E-06 | 2.13894 |
| ATP2B1           | 2.93E-06 | 2.13989 |
| IDH1             | 1.40E-07 | 2.14173 |
| ZNF193           | 4.66E-08 | 2.14375 |
| PER1             | 1.01E-06 | 2.14618 |
| ---              | 0.02624  | 2.14637 |
| HDAC8            | 1.42E-05 | 2.14874 |
| SP110            | 1.04E-05 | 2.14969 |
| LOH12CR1         | 6.87E-05 | 2.15057 |
| ---              | 0.00034  | 2.15147 |
| ISG20            | 1.70E-06 | 2.15151 |
| GTF2H1           | 3.40E-06 | 2.15286 |
| BANK1            | 0.0003   | 2.15294 |
| CIP29            | 1.56E-07 | 2.1536  |
| C1orf71          | 7.80E-05 | 2.15363 |
| RDH11            | 9.17E-08 | 2.15437 |
| ACAT1            | 4.96E-09 | 2.15508 |
| REEP5            | 1.10E-08 | 2.15547 |
| SCO2             | 4.76E-06 | 2.15628 |
| FOXO1            | 0.00011  | 2.15631 |
| SERTAD2          | 3.76E-07 | 2.15639 |
| ---              | 1.85E-10 | 2.15883 |
| ARAPL1 /// GABAR | 0.00267  | 2.15956 |
| NAMPT            | 3.39E-07 | 2.15968 |
| HIST1H2AM        | 4.70E-05 | 2.16006 |
| C10orf47         | 2.25E-09 | 2.16065 |
| MAP2             | 1.99E-05 | 2.16091 |
| RRP12            | 4.79E-06 | 2.16131 |
| NUP98            | 9.67E-07 | 2.16367 |
| ATP9A            | 5.02E-07 | 2.16415 |
| MINA             | 2.38E-05 | 2.16475 |
| PDCD2L           | 7.32E-08 | 2.16481 |
| MCOLN3           | 1.05E-06 | 2.16543 |
| HES1             | 3.07E-06 | 2.16546 |
| TMEM88           | 0.00054  | 2.1662  |
| ABCC5            | 1.16E-08 | 2.16917 |
| NBPF8            | 4.29E-05 | 2.17054 |
| MYO1B            | 6.07E-09 | 2.17087 |
| RHOBTB1          | 3.60E-06 | 2.17308 |
| SLC22A4          | 0.00042  | 2.17384 |

|                     |          |         |
|---------------------|----------|---------|
| ICAM1               | 3.14E-07 | 2.17389 |
| ---                 | 3.13E-07 | 2.17476 |
| SOCS1               | 0.00227  | 2.17479 |
| ZCCHC2              | 4.66E-06 | 2.17631 |
| PTGER4              | 7.75E-06 | 2.17755 |
| FAM152B             | 1.10E-05 | 2.18057 |
| PRNP                | 1.93E-05 | 2.18138 |
| IL28A /// IL28B     | 1.46E-06 | 2.18189 |
| BHLHB2              | 2.91E-09 | 2.18291 |
| ---                 | 0.00045  | 2.18336 |
| LOC643201           | 0.02553  | 2.1848  |
| NEDD4L              | 1.96E-06 | 2.18516 |
| API5                | 6.38E-05 | 2.18586 |
| ---                 | 0.0003   | 2.18829 |
| NUFIP1              | 7.52E-07 | 2.18888 |
| ZNFX1               | 8.70E-09 | 2.18924 |
| OPTN                | 4.24E-07 | 2.1903  |
| ---                 | 4.19E-07 | 2.19099 |
| FUT11               | 5.21E-06 | 2.19193 |
| TESK2               | 4.03E-06 | 2.19204 |
| OSTM1               | 9.41E-05 | 2.19667 |
| C14orf149           | 3.29E-08 | 2.19751 |
| ---                 | 9.43E-07 | 2.2005  |
| EXT1                | 1.50E-05 | 2.20263 |
| GNAS                | 7.84E-09 | 2.20697 |
| OSBPL6              | 0.00264  | 2.20959 |
| INSIG2              | 2.37E-07 | 2.20975 |
| RNF213              | 1.24E-06 | 2.20976 |
| ARNT                | 3.21E-05 | 2.21054 |
| CARS                | 0.00012  | 2.21122 |
| LOC728568           | 6.39E-08 | 2.21133 |
| CFL2                | 0.00024  | 2.21181 |
| NOL3                | 1.63E-10 | 2.21374 |
| SETD3               | 1.30E-06 | 2.2148  |
| PITPNA              | 2.38E-06 | 2.21529 |
| GADD45B             | 7.48E-08 | 2.21623 |
| ---                 | 3.36E-06 | 2.22069 |
| RIPK2               | 2.30E-05 | 2.2214  |
| SAT1                | 7.83E-07 | 2.22268 |
| ---                 | 0.00066  | 2.22505 |
| EPAS1               | 0.00014  | 2.22689 |
| ISG20               | 7.23E-10 | 2.22711 |
| KB1 /// SPANXB2 /// | 2.34E-06 | 2.22722 |
| ATP2B1              | 4.99E-05 | 2.22842 |
| KLHL2               | 4.96E-06 | 2.2311  |
| AVPI1               | 1.47E-08 | 2.23166 |
| AM84A /// LOC65360  | 1.03E-07 | 2.23375 |
| C3orf52             | 8.23E-05 | 2.23586 |
| LHFPL2              | 7.22E-05 | 2.23887 |

|                   |          |         |
|-------------------|----------|---------|
| M CART1           | 0.00036  | 2.24319 |
| SEC24D            | 0.00014  | 2.24327 |
| NUCB2             | 1.47E-05 | 2.24625 |
| RNF213            | 7.91E-05 | 2.24667 |
| DCLK1             | 3.38E-08 | 2.24743 |
| LOC286167         | 1.13E-05 | 2.24801 |
| ARSG              | 4.10E-05 | 2.24855 |
| ATF3              | 5.32E-06 | 2.24904 |
| NUDT4 /// NUDT4P1 | 6.93E-06 | 2.25376 |
| C2orf49           | 1.81E-06 | 2.25438 |
| CSRP2             | 8.24E-05 | 2.25482 |
| ---               | 0.00016  | 2.25536 |
| GADD45B           | 8.35E-08 | 2.25589 |
| CHD2              | 1.93E-08 | 2.25957 |
| CDK6              | 4.88E-07 | 2.26208 |
| CXCR7             | 1.75E-09 | 2.26278 |
| C17orf91          | 3.89E-05 | 2.26279 |
| PPFIBP2           | 3.38E-06 | 2.26304 |
| WWC3              | 5.94E-07 | 2.26451 |
| ALAD              | 5.87E-06 | 2.26673 |
| AFF4              | 0.00032  | 2.26689 |
| SLC41A1           | 1.17E-06 | 2.26701 |
| GALC              | 1.62E-07 | 2.26886 |
| FLRT3             | 0.00022  | 2.27393 |
| CAB39             | 1.85E-05 | 2.27479 |
| TBX3              | 2.08E-05 | 2.27532 |
| ZBTB10            | 0.00013  | 2.27552 |
| PPA2              | 1.63E-05 | 2.27585 |
| KLHL13            | 5.27E-05 | 2.27837 |
| LOC647190         | 0.0028   | 2.28043 |
| TIGD7             | 0.00713  | 2.28868 |
| GPRC5A            | 4.70E-10 | 2.29146 |
| FZD7              | 1.11E-06 | 2.2923  |
| ---               | 1.63E-08 | 2.29259 |
| SMUG1             | 7.06E-08 | 2.29325 |
| YIPF5             | 1.41E-07 | 2.29818 |
| C1orf91           | 0.00022  | 2.29895 |
| PTCH1             | 7.95E-05 | 2.30107 |
| IL6ST             | 1.33E-06 | 2.30123 |
| CRBN              | 6.16E-06 | 2.30454 |
| ---               | 1.63E-06 | 2.30466 |
| ---               | 1.40E-06 | 2.30477 |
| NR3C1             | 1.13E-07 | 2.30733 |
| HLA-A             | 1.83E-10 | 2.31044 |
| ZNF23             | 4.75E-05 | 2.31069 |
| SEC24A            | 4.37E-07 | 2.31238 |
| BCL3              | 2.61E-09 | 2.31329 |
| PCSK2             | 2.04E-06 | 2.31406 |
| NFX1              | 3.10E-10 | 2.31587 |

|              |          |         |
|--------------|----------|---------|
| FGD6         | 5.17E-05 | 2.31656 |
| PGM2L1       | 6.42E-06 | 2.31723 |
| ---          | 0.00078  | 2.31881 |
| ZNF174       | 2.24E-05 | 2.31952 |
| CD83         | 2.14E-06 | 2.32103 |
| DNAJB9       | 3.40E-08 | 2.32218 |
| PHYH         | 1.09E-07 | 2.32465 |
| TRAFD1       | 6.44E-08 | 2.32534 |
| CORO2A       | 3.76E-07 | 2.32726 |
| RRAGB        | 1.87E-05 | 2.32746 |
| ENPP1        | 2.86E-08 | 2.32991 |
| HES1         | 1.37E-09 | 2.33134 |
| CPEB4        | 2.95E-05 | 2.33176 |
| NOD2         | 3.15E-05 | 2.33247 |
| TSC22D3      | 1.95E-08 | 2.33436 |
| ERN1         | 4.23E-05 | 2.33457 |
| NOL3         | 4.22E-08 | 2.33904 |
| PPP1R15A     | 1.94E-05 | 2.34029 |
| SLC6A14      | 1.55E-07 | 2.34081 |
| ---          | 7.07E-07 | 2.34116 |
| ERAP1        | 0.00068  | 2.34171 |
| C4orf18      | 0.00024  | 2.34345 |
| NOL3         | 1.31E-08 | 2.34389 |
| DUSP8        | 8.87E-05 | 2.34577 |
| RNF7         | 0.00104  | 2.34654 |
| FLVCR2       | 1.19E-06 | 2.35106 |
| SNX5         | 1.24E-09 | 2.35496 |
| PLSCR1       | 4.82E-07 | 2.3553  |
| LOC100131914 | 9.81E-06 | 2.35681 |
| OBFC2A       | 4.09E-06 | 2.36014 |
| TRIM36       | 5.46E-08 | 2.36112 |
| LGALS8       | 4.33E-07 | 2.36345 |
| THAP8        | 1.78E-06 | 2.36454 |
| TARS         | 2.46E-07 | 2.36469 |
| SLC31A2      | 5.49E-06 | 2.36605 |
| CORO2A       | 1.41E-08 | 2.36665 |
| KIAA1618     | 0.00018  | 2.36867 |
| GRB10        | 0.00173  | 2.37199 |
| RNF213       | 1.64E-09 | 2.37308 |
| CCRN4L       | 0.00336  | 2.37313 |
| ELF3         | 2.31E-09 | 2.37336 |
| MSMB         | 0.00041  | 2.3741  |
| HLA-F        | 1.46E-08 | 2.37417 |
| SOX9         | 0.00018  | 2.37672 |
| ---          | 4.03E-07 | 2.37929 |
| ---          | 0.00017  | 2.37941 |
| PRSS22       | 2.56E-08 | 2.38012 |
| ---          | 2.43E-06 | 2.38195 |
| HLA-DRB6     | 0.00485  | 2.38315 |

|              |          |         |
|--------------|----------|---------|
| SERTAD2      | 3.45E-06 | 2.38469 |
| USP43        | 0.00675  | 2.38605 |
| BANK1        | 0.00043  | 2.38759 |
| MSI2         | 1.57E-05 | 2.38849 |
| KIAA1467     | 2.56E-07 | 2.38903 |
| C5orf41      | 0.0007   | 2.39129 |
| ARRDC3       | 1.69E-07 | 2.39141 |
| IRF2BP2      | 6.65E-07 | 2.39349 |
| KIAA0888     | 4.45E-05 | 2.39438 |
| GEM          | 6.17E-05 | 2.39487 |
| ZNF323       | 1.45E-06 | 2.39744 |
| SAT1         | 5.83E-09 | 2.39928 |
| CYP2J2       | 1.93E-07 | 2.39941 |
| C2orf60      | 5.40E-08 | 2.39995 |
| TNS3         | 7.89E-05 | 2.40027 |
| IRAK2        | 0.0005   | 2.40064 |
| SLC17A5      | 3.82E-06 | 2.40227 |
| NFKBIE       | 9.66E-06 | 2.40341 |
| ---          | 0.01661  | 2.40735 |
| LNP1         | 1.62E-06 | 2.41042 |
| ---          | 0.01299  | 2.41211 |
| PDK4         | 0.00356  | 2.41243 |
| TNFRSF12A    | 1.79E-10 | 2.41279 |
| RAI14        | 1.75E-07 | 2.41295 |
| FSIP1        | 1.99E-05 | 2.41314 |
| LOC100128501 | 2.54E-06 | 2.41678 |
| ---          | 1.05E-07 | 2.4176  |
| CCL5         | 0.00043  | 2.41828 |
| SP110        | 0.00025  | 2.42017 |
| SGPP2        | 0.00044  | 2.42103 |
| RAB27B       | 8.85E-09 | 2.4231  |
| JMJD3        | 1.91E-06 | 2.42494 |
| FLVCR2       | 6.76E-05 | 2.42604 |
| RAPH1        | 1.71E-06 | 2.42699 |
| ---          | 1.72E-05 | 2.42783 |
| FBXO32       | 7.35E-07 | 2.43097 |
| SLC17A5      | 1.91E-06 | 2.43256 |
| ---          | 0.00127  | 2.43395 |
| ---          | 6.38E-06 | 2.44    |
| TSC22D3      | 8.59E-06 | 2.4402  |
| VAMP2        | 1.42E-05 | 2.44155 |
| PGM2L1       | 0.00253  | 2.44275 |
| ONECUT2      | 0.00384  | 2.4431  |
| ---          | 7.65E-05 | 2.44339 |
| LARP6        | 6.41E-07 | 2.4453  |
| OBFC2A       | 0.00022  | 2.44656 |
| FKBP11       | 9.42E-10 | 2.44864 |
| PCAF         | 7.60E-06 | 2.44962 |
| FGD6         | 3.01E-07 | 2.45229 |

|                     |          |         |
|---------------------|----------|---------|
| RASEF               | 1.02E-07 | 2.45278 |
| HES4                | 4.42E-07 | 2.45337 |
| CXCL16              | 1.65E-05 | 2.45362 |
| HIG2                | 1.67E-08 | 2.45825 |
| PTBP2               | 2.17E-05 | 2.45872 |
| HIST1H4E            | 7.58E-07 | 2.45919 |
| SCD                 | 5.26E-07 | 2.4607  |
| ---                 | 0.00112  | 2.46152 |
| ADM                 | 1.03E-07 | 2.4621  |
| NAMPT               | 1.24E-06 | 2.46402 |
| AHRR /// PDCD6      | 0.00031  | 2.46525 |
| ---                 | 0.00023  | 2.46963 |
| ISG15               | 1.10E-07 | 2.47107 |
| C5orf41             | 2.73E-06 | 2.47777 |
| AZI2                | 5.59E-05 | 2.47872 |
| GOSR2               | 2.63E-06 | 2.47901 |
| PRIC285             | 5.73E-05 | 2.47905 |
| /// DNAH14 /// RP11 | 1.16E-06 | 2.47923 |
| CPEB4               | 1.27E-05 | 2.48413 |
| LOC554206           | 6.11E-05 | 2.48579 |
| PPM1K               | 8.44E-08 | 2.48588 |
| ---                 | 1.52E-05 | 2.48728 |
| GPR157              | 7.51E-06 | 2.48874 |
| LARP2               | 1.94E-07 | 2.48921 |
| CA4                 | 1.69E-06 | 2.49002 |
| KIAA1217            | 1.70E-06 | 2.49553 |
| LOC440957           | 3.33E-06 | 2.49754 |
| LTB4DH              | 2.32E-06 | 2.50041 |
| NR3C1               | 6.47E-08 | 2.5017  |
| PPP3CC              | 0.00094  | 2.50593 |
| P2RX2               | 0.0003   | 2.50911 |
| 2H2AA3 /// HIST2H1  | 2.36E-08 | 2.51043 |
| IKZF2               | 4.78E-06 | 2.51567 |
| DUSP3               | 3.36E-07 | 2.52206 |
| JMY                 | 8.63E-05 | 2.5221  |
| RNF43               | 3.31E-06 | 2.5226  |
| POLR3D              | 1.36E-06 | 2.52351 |
| BATF2               | 6.34E-05 | 2.52974 |
| LARP6               | 8.40E-07 | 2.53057 |
| TRIM14              | 2.82E-07 | 2.53172 |
| IFI6                | 5.96E-07 | 2.53362 |
| LOC130576           | 3.98E-08 | 2.5365  |
| SCD                 | 2.39E-07 | 2.53938 |
| JMJD4               | 3.75E-06 | 2.53965 |
| TPM3                | 1.57E-05 | 2.54122 |
| ---                 | 2.09E-05 | 2.54387 |
| SPRY1               | 0.0006   | 2.54631 |
| CYR61               | 2.37E-05 | 2.54828 |
| RFTN1               | 4.19E-07 | 2.54916 |

|                    |          |         |
|--------------------|----------|---------|
| CYP4B1             | 2.35E-05 | 2.54961 |
| RNMT               | 4.19E-05 | 2.55118 |
| LOC126075          | 0.00027  | 2.5514  |
| ---                | 2.15E-05 | 2.55279 |
| T1H2AJ /// HIST1H2 | 3.42E-06 | 2.55681 |
| HLA-J              | 1.76E-06 | 2.55738 |
| EPB41L5            | 6.38E-05 | 2.5577  |
| LGALS8             | 1.69E-09 | 2.55886 |
| DN9 /// LOC1001344 | 7.37E-05 | 2.56084 |
| ALDH3B2            | 3.97E-08 | 2.56373 |
| B2M                | 0.00034  | 2.56382 |
| LOC727916          | 0.0006   | 2.56657 |
| MCOLN3             | 2.44E-06 | 2.56867 |
| KIAA0513           | 1.59E-09 | 2.57162 |
| ONECUT2            | 1.82E-06 | 2.57825 |
| CDKN1A             | 8.79E-10 | 2.57989 |
| WDR22              | 7.15E-06 | 2.58068 |
| BEX2               | 1.65E-08 | 2.58184 |
| DAB2               | 0.00014  | 2.58186 |
| PPM1E              | 1.79E-05 | 2.58535 |
| MARS               | 2.64E-06 | 2.58685 |
| LOC100132999       | 2.56E-05 | 2.58757 |
| ---                | 0.00017  | 2.58865 |
| LOC100132418       | 7.21E-10 | 2.59071 |
| SEC24D             | 0.00019  | 2.59683 |
| LOC285074          | 4.93E-06 | 2.60057 |
| BDKRB2             | 6.02E-07 | 2.60123 |
| RDX                | 1.95E-07 | 2.60722 |
| KLF6               | 1.54E-08 | 2.60945 |
| ---                | 0.00205  | 2.61009 |
| RDX                | 6.76E-11 | 2.61148 |
| C10orf47           | 4.39E-07 | 2.61156 |
| JMJD3              | 2.77E-07 | 2.62114 |
| SLC2A6             | 1.74E-08 | 2.62137 |
| PTPN21             | 2.20E-06 | 2.62203 |
| BASP1              | 2.28E-09 | 2.62479 |
| FAM13A1            | 0.00366  | 2.62559 |
| CLGN               | 0.00042  | 2.62701 |
| ---                | 2.68E-07 | 2.62945 |
| STBD1              | 3.45E-06 | 2.63353 |
| KLF6               | 2.52E-08 | 2.63522 |
| WNT2B              | 3.09E-06 | 2.64037 |
| ---                | 2.30E-08 | 2.6443  |
| EMR1               | 5.27E-05 | 2.64437 |
| LIN7B              | 7.41E-05 | 2.64514 |
| IFNGR1             | 3.30E-09 | 2.64696 |
| P2RX2              | 4.62E-06 | 2.6474  |
| FGF18              | 4.71E-05 | 2.66194 |
| RAB9A              | 3.53E-09 | 2.6629  |



|                   |          |         |
|-------------------|----------|---------|
| ANKRD50           | 6.81E-05 | 2.66785 |
| ZNF496            | 6.63E-05 | 2.66806 |
| DNAJB9            | 1.54E-05 | 2.66863 |
| PNPT1             | 1.99E-08 | 2.66993 |
| UBE3B             | 2.46E-06 | 2.67072 |
| TP53INP2          | 2.30E-07 | 2.67279 |
| INPP4B            | 4.30E-09 | 2.67637 |
| MVD               | 4.80E-06 | 2.67757 |
| LOC440836         | 0.00016  | 2.68406 |
| KLF6              | 2.83E-09 | 2.68524 |
| PML               | 1.90E-07 | 2.69012 |
| HOXA5             | 4.06E-06 | 2.69045 |
| PTPN21            | 0.00011  | 2.69389 |
| STAT1             | 1.33E-09 | 2.69733 |
| HMHA1             | 3.40E-07 | 2.69819 |
| CCDC83            | 1.94E-06 | 2.69883 |
| KLHL24            | 9.64E-05 | 2.70733 |
| MAX               | 0.00058  | 2.71288 |
| RHOU              | 2.36E-07 | 2.72765 |
| RASGRP1           | 0.00039  | 2.72995 |
| C11orf17 /// NUA2 | 1.35E-08 | 2.73968 |
| ASB9              | 7.70E-08 | 2.74133 |
| RHOV              | 2.29E-07 | 2.7439  |
| CLMN              | 8.62E-07 | 2.74597 |
| GPR37             | 0.00036  | 2.74828 |
| CSRP2             | 1.04E-06 | 2.74883 |
| LOC441108         | 0.00106  | 2.75201 |
| SGPP1             | 1.23E-06 | 2.75206 |
| HLA-C             | 5.36E-10 | 2.76384 |
| NAMPT             | 7.48E-07 | 2.7645  |
| ATP6V1G1          | 9.65E-06 | 2.7671  |
| GALT              | 6.62E-07 | 2.76769 |
| CIQTNF6           | 4.71E-07 | 2.76941 |
| OAS3              | 2.18E-09 | 2.77069 |
| APOL2             | 1.13E-05 | 2.77267 |
| ---               | 0.00172  | 2.77683 |
| GSTM3             | 7.48E-11 | 2.77939 |
| STAT1             | 1.32E-09 | 2.7808  |
| KLHL18            | 0.00165  | 2.78403 |
| ING3              | 4.05E-05 | 2.78431 |
| SCNN1A            | 3.77E-05 | 2.78751 |
| CPEB4             | 2.74E-05 | 2.7881  |
| FGD3              | 0.00086  | 2.78869 |
| HSD11B2           | 1.99E-05 | 2.79196 |
| RAPH1             | 1.23E-10 | 2.7924  |
| TRIM69            | 1.91E-06 | 2.79255 |
| JMJD3             | 4.28E-09 | 2.79363 |
| JUB               | 3.93E-08 | 2.79594 |
| NUPR1             | 9.96E-07 | 2.7962  |

|                      |          |         |
|----------------------|----------|---------|
| SGPP1                | 1.39E-08 | 2.79994 |
| ---                  | 4.41E-07 | 2.80168 |
| SERPINE2             | 3.72E-05 | 2.80355 |
| ---                  | 0.00019  | 2.80711 |
| RANBP2               | 4.98E-08 | 2.80833 |
| ARRB1                | 1.47E-05 | 2.8109  |
| HLA-DRB1             | 3.28E-08 | 2.81882 |
| LOC284561            | 1.54E-05 | 2.82138 |
| SOX9                 | 5.52E-06 | 2.82164 |
| OSTM1                | 0.0002   | 2.82382 |
| KIAA1618             | 5.26E-05 | 2.84299 |
| HIST1H2AK            | 6.84E-07 | 2.84308 |
| STAT1                | 8.38E-09 | 2.84685 |
| HIST2H2BE            | 6.81E-10 | 2.851   |
| ---                  | 1.74E-05 | 2.8525  |
| ---                  | 2.91E-12 | 2.85336 |
| ANXA9                | 4.41E-08 | 2.85447 |
| A-C /// MICA /// MIC | 1.08E-08 | 2.85475 |
| ---                  | 0.00013  | 2.85555 |
| ANXA3                | 4.64E-06 | 2.8608  |
| GRAMD3               | 6.32E-08 | 2.86394 |
| AMDHD2               | 1.30E-06 | 2.8826  |
| ANXA9                | 1.07E-08 | 2.88752 |
| SP100                | 1.15E-07 | 2.89259 |
| MTRF1                | 6.89E-06 | 2.89404 |
| NMI                  | 5.52E-09 | 2.89582 |
| KRT7                 | 3.21E-09 | 2.89675 |
| N4BP2L2              | 9.98E-05 | 2.90287 |
| SLC7A6 /// TRPV6     | 1.11E-06 | 2.903   |
| TPM1                 | 4.05E-06 | 2.90325 |
| SENP5                | 2.82E-07 | 2.91413 |
| CHD2                 | 2.45E-09 | 2.91582 |
| TRIM14               | 9.73E-06 | 2.91601 |
| TNFRSF11B            | 6.77E-07 | 2.92124 |
| DUSP3                | 8.36E-07 | 2.92206 |
| LIMA1                | 1.21E-06 | 2.92237 |
| STARD4               | 6.49E-05 | 2.92282 |
| PPAP2B               | 2.43E-06 | 2.923   |
| SAMD4A               | 6.21E-05 | 2.92334 |
| TFPI2                | 0.0004   | 2.92904 |
| PLCG2                | 1.70E-06 | 2.9305  |
| HSH2D                | 1.40E-06 | 2.93057 |
| IL28A                | 0.0001   | 2.93972 |
| C1orf79              | 2.22E-09 | 2.93999 |
| SEC24A               | 1.37E-07 | 2.94621 |
| SP110                | 3.84E-10 | 2.95254 |
| BAG1                 | 2.71E-10 | 2.95497 |
| IFNGR1               | 2.04E-06 | 2.95551 |
| RUNX2                | 2.85E-06 | 2.95603 |

|                       |          |         |
|-----------------------|----------|---------|
| ASNS                  | 5.08E-09 | 2.971   |
| PP9284 /// TMRSS2     | 1.67E-09 | 2.97142 |
| ---                   | 3.12E-08 | 2.97367 |
| JUN                   | 5.26E-10 | 2.975   |
| IFIH1                 | 2.26E-06 | 2.9753  |
| CD55                  | 1.35E-10 | 2.98214 |
| VEZT                  | 2.47E-06 | 2.98441 |
| PLSCR1                | 4.00E-10 | 2.98687 |
| HCP5                  | 0.01263  | 2.98926 |
| ZNF3                  | 1.11E-07 | 2.99702 |
| ---                   | 2.28E-05 | 3.00527 |
| LSS                   | 0.00016  | 3.00615 |
| IFITM1                | 4.13E-08 | 3.00834 |
| KLF10                 | 1.72E-07 | 3.01175 |
| KIAA1946              | 1.23E-07 | 3.01321 |
| HLA-F                 | 2.99E-08 | 3.01896 |
| DOPEY2                | 1.52E-07 | 3.02205 |
| DNAJB6                | 4.47E-08 | 3.02354 |
| GADD45A               | 3.45E-09 | 3.02517 |
| CNKSR3                | 8.34E-07 | 3.02685 |
| TAF13                 | 0.00041  | 3.03    |
| CD55                  | 9.93E-10 | 3.03434 |
| KAL1                  | 1.28E-05 | 3.03494 |
| COL9A2                | 1.87E-05 | 3.03924 |
| NRP1                  | 8.11E-08 | 3.04144 |
| PPP1R3B               | 5.04E-07 | 3.04513 |
| GPR37                 | 1.27E-08 | 3.04892 |
| ---                   | 7.73E-11 | 3.04919 |
| TncRNA                | 1.12E-09 | 3.05054 |
| SP110                 | 6.38E-10 | 3.05503 |
| LIMCH1                | 1.37E-06 | 3.06085 |
| TARP /// TRGC2        | 0.00014  | 3.06179 |
| ---                   | 1.57E-08 | 3.06225 |
| DLX2                  | 8.33E-05 | 3.0646  |
| LRRC50                | 7.51E-07 | 3.06506 |
| ---                   | 2.62E-08 | 3.0676  |
| DTNA                  | 4.28E-06 | 3.07073 |
| NFKB2                 | 1.22E-06 | 3.07079 |
| IFITM1                | 5.82E-11 | 3.08029 |
| PTPN21                | 2.40E-07 | 3.08323 |
| DAB2                  | 2.80E-08 | 3.0838  |
| ---                   | 1.10E-06 | 3.08854 |
| / MICA /// MICB /// X | 1.94E-09 | 3.08977 |
| KLHL24                | 1.76E-07 | 3.09036 |
| LOC26010              | 2.48E-07 | 3.09068 |
| TACC1                 | 5.93E-08 | 3.09185 |
| RAB27B                | 5.60E-05 | 3.09294 |
| FSD1L                 | 2.94E-05 | 3.09693 |
| // HLA-DRB5 /// LOC   | 8.63E-08 | 3.1063  |

|                     |          |         |
|---------------------|----------|---------|
| FAM80A              | 2.56E-07 | 3.11587 |
| ---                 | 7.24E-07 | 3.12256 |
| HLF                 | 4.93E-05 | 3.12439 |
| RDX                 | 7.58E-07 | 3.12802 |
| SLC7A5              | 5.40E-10 | 3.13068 |
| TACC1               | 4.02E-07 | 3.13455 |
| C5orf41             | 4.72E-05 | 3.13702 |
| SAT1                | 1.06E-09 | 3.13897 |
| HK2                 | 1.54E-06 | 3.14215 |
| LMCD1               | 4.22E-08 | 3.14299 |
| VDR                 | 4.65E-07 | 3.15122 |
| NEDD9               | 0.00125  | 3.15436 |
| C1orf43             | 4.17E-09 | 3.15604 |
| RHOU                | 4.21E-07 | 3.16387 |
| LIMCH1              | 3.58E-06 | 3.16608 |
| BAG1                | 1.01E-08 | 3.16838 |
| FAM83A              | 6.52E-07 | 3.17196 |
| PPP1R3B             | 8.63E-07 | 3.17445 |
| FLJ11286            | 2.13E-06 | 3.17863 |
| STC2                | 1.29E-09 | 3.1968  |
| CXorf61             | 2.54E-08 | 3.19739 |
| BTG2                | 6.96E-06 | 3.20461 |
| TNFSF10             | 6.94E-07 | 3.21459 |
| TAP2                | 3.57E-06 | 3.21695 |
| BRD4                | 9.82E-06 | 3.21953 |
| RRAGD               | 1.51E-09 | 3.21967 |
| C5orf41             | 2.10E-06 | 3.22031 |
| ---                 | 4.02E-07 | 3.22803 |
| CEACAM6             | 2.95E-08 | 3.23617 |
| PPP1R15A            | 1.40E-08 | 3.23655 |
| SLC41A2             | 3.86E-06 | 3.24034 |
| CTSC                | 1.01E-05 | 3.24086 |
| PER1                | 2.06E-06 | 3.24606 |
| ---                 | 0.00043  | 3.24837 |
| SP110               | 1.37E-08 | 3.2626  |
| AGPAT9              | 2.29E-07 | 3.26616 |
| BTG2                | 2.40E-11 | 3.26716 |
| C8orf46             | 5.01E-05 | 3.26718 |
| C100131062 /// PTP4 | 0.00016  | 3.26831 |
| LGALS3BP            | 3.53E-10 | 3.2791  |
| ALDH3B2             | 4.56E-05 | 3.28317 |
| ---                 | 8.45E-09 | 3.28545 |
| TACC1               | 7.23E-10 | 3.28889 |
| IFI35               | 6.45E-10 | 3.29252 |
| DAB2                | 2.64E-06 | 3.2984  |
| ONECUT2             | 1.19E-05 | 3.30304 |
| JMJD3               | 3.95E-09 | 3.31284 |
| LOC100130506        | 3.24E-10 | 3.32148 |
| CEACAM6             | 1.23E-07 | 3.32355 |

|                       |          |         |
|-----------------------|----------|---------|
| ---                   | 2.34E-07 | 3.32898 |
| TMEM45B               | 1.48E-08 | 3.33552 |
| IFIH1                 | 2.44E-06 | 3.33687 |
| ARRB1                 | 9.96E-07 | 3.3396  |
| ZBTB10                | 9.45E-08 | 3.34543 |
| CLU                   | 2.17E-07 | 3.34719 |
| IGSF5                 | 3.38E-06 | 3.34826 |
| IFIH1                 | 0.00064  | 3.37231 |
| EPS15L1               | 4.38E-09 | 3.37424 |
| LACTB                 | 9.95E-06 | 3.38501 |
| RRAGD                 | 3.85E-06 | 3.38658 |
| ANKRD37               | 2.05E-07 | 3.39104 |
| JUN                   | 1.32E-05 | 3.40726 |
| BHLHB2                | 2.97E-06 | 3.4126  |
| BIRC3                 | 8.31E-05 | 3.42702 |
| FLJ11286              | 1.74E-07 | 3.43779 |
| SERHL /// SERHL2      | 1.58E-05 | 3.45088 |
| AXUD1                 | 2.80E-08 | 3.45144 |
| SH3BP2                | 4.06E-05 | 3.45563 |
| ---                   | 8.20E-06 | 3.46451 |
| TAP2                  | 1.86E-08 | 3.46542 |
| MSI2                  | 8.46E-08 | 3.4656  |
| ---                   | 6.01E-06 | 3.46708 |
| LOC100128416          | 1.01E-06 | 3.47718 |
| CCRN4L                | 7.08E-08 | 3.48831 |
| ---                   | 1.04E-06 | 3.50145 |
| FSTL3                 | 0.00014  | 3.51751 |
| IL15                  | 2.09E-05 | 3.52441 |
| KLHL24                | 5.89E-07 | 3.5282  |
| SH3BGRL2              | 4.15E-05 | 3.53168 |
| ---                   | 3.22E-07 | 3.54528 |
| EFNA1                 | 9.73E-09 | 3.54964 |
| MX1                   | 4.46E-05 | 3.55061 |
| MAFF                  | 9.50E-09 | 3.55279 |
| ---                   | 2.81E-06 | 3.55668 |
| KLF6                  | 7.49E-07 | 3.55889 |
| PEL1                  | 2.03E-06 | 3.56051 |
| BTN3A2 /// BTN3A3     | 9.50E-07 | 3.57964 |
| NCOA7                 | 3.34E-09 | 3.58468 |
| LIMA1                 | 1.91E-07 | 3.59599 |
| PPP1R3E               | 3.45E-06 | 3.60565 |
| SP100                 | 5.71E-10 | 3.60625 |
| HIST1H4H /// HIST1H4A | 7.77E-09 | 3.60992 |
| IKBKE                 | 8.07E-08 | 3.62944 |
| ANGPTL4               | 3.78E-07 | 3.64319 |
| SQSTM1                | 1.16E-06 | 3.64989 |
| LIN7A                 | 1.79E-07 | 3.65251 |
| HRASLS3               | 4.17E-09 | 3.65446 |
| PPAP2B                | 9.76E-07 | 3.65604 |

|                     |          |         |
|---------------------|----------|---------|
| OPTN                | 1.64E-09 | 3.65717 |
| ERO1LB              | 0.00017  | 3.65936 |
| SAMHD1              | 3.52E-08 | 3.65985 |
| CD55                | 4.39E-08 | 3.66691 |
| COLEC12             | 7.12E-08 | 3.66862 |
| IFIT5               | 1.41E-09 | 3.67232 |
| PKIA                | 2.93E-10 | 3.68888 |
| SPANXA2 /// SPANX   | 1.20E-06 | 3.68956 |
| PSCA                | 0.00043  | 3.70049 |
| IRF7                | 1.41E-09 | 3.70117 |
| FLJ11286            | 2.72E-13 | 3.7022  |
| ---                 | 1.81E-06 | 3.7033  |
| LPIN1               | 7.67E-09 | 3.71035 |
| TESC                | 0.00046  | 3.71048 |
| ABCG2               | 1.24E-07 | 3.72955 |
| HLA-B               | 2.49E-09 | 3.73677 |
| NEDD9               | 9.89E-10 | 3.74068 |
| BEX5                | 4.52E-07 | 3.74704 |
| ANGPTL4             | 3.78E-08 | 3.74857 |
| STAT1               | 3.67E-11 | 3.761   |
| TMEM45B             | 6.69E-08 | 3.77291 |
| FAM83A              | 1.08E-07 | 3.78506 |
| CHAC1               | 2.94E-06 | 3.78691 |
| STAT1               | 2.34E-09 | 3.8035  |
| JHDM1D              | 1.85E-06 | 3.82088 |
| DUSP10              | 1.23E-09 | 3.82156 |
| LPIN1               | 4.25E-08 | 3.82602 |
| CTSH                | 8.47E-10 | 3.83393 |
| PP14571             | 2.09E-07 | 3.83405 |
| // HLA-DRB5 /// LOC | 1.04E-08 | 3.84725 |
| HIST1H4H /// HIST1H | 5.28E-08 | 3.85238 |
| LOC400236           | 1.03E-06 | 3.86775 |
| PARP10              | 7.47E-06 | 3.87726 |
| JUB                 | 2.68E-09 | 3.87746 |
| INTS6               | 2.14E-05 | 3.88066 |
| PKIA                | 8.85E-08 | 3.88393 |
| FAM83A              | 1.06E-07 | 3.90094 |
| TGFA                | 1.15E-06 | 3.91359 |
| BAMBI               | 6.85E-13 | 3.92647 |
| ZBTB10              | 1.51E-06 | 3.93284 |
| ITGB8               | 2.06E-05 | 3.9439  |
| PARP9               | 9.13E-08 | 3.94456 |
| PARP12              | 1.27E-07 | 3.94595 |
| PARP14              | 3.82E-11 | 3.96237 |
| KMO                 | 4.54E-07 | 3.96355 |
| NANOS1              | 6.57E-09 | 3.9638  |
| CSTA                | 5.95E-11 | 3.97803 |
| ---                 | 6.33E-09 | 4.00904 |
| TMPRSS2             | 5.91E-06 | 4.02886 |

|                     |          |         |
|---------------------|----------|---------|
| PARP9               | 1.08E-12 | 4.04163 |
| GATA6               | 5.41E-07 | 4.06243 |
| SP100               | 1.41E-08 | 4.07105 |
| LIMA1               | 0.00042  | 4.07281 |
| FLJ43663            | 0.00011  | 4.07518 |
| SOCS3               | 5.74E-08 | 4.07545 |
| TNFRSF11B           | 3.25E-09 | 4.0811  |
| JDP2                | 3.32E-07 | 4.08287 |
| ---                 | 1.05E-06 | 4.09508 |
| C1orf79             | 1.23E-08 | 4.09833 |
| KMO                 | 2.18E-06 | 4.10415 |
| MTUS1               | 1.57E-08 | 4.11731 |
| RELB                | 1.09E-07 | 4.13431 |
| HIST1H4H /// HIST1H | 4.07E-09 | 4.13619 |
| STAT1               | 5.53E-10 | 4.15168 |
| JUN                 | 1.89E-09 | 4.16286 |
| RND3                | 9.82E-09 | 4.1707  |
| SC5DL               | 5.78E-08 | 4.1792  |
| RAPH1               | 8.10E-10 | 4.18963 |
| ---                 | 3.28E-07 | 4.20094 |
| SAMHD1              | 2.74E-06 | 4.25408 |
| ADFP                | 6.89E-08 | 4.25892 |
| // HLA-DRB5 /// LOC | 9.61E-09 | 4.26983 |
| FZD5                | 6.87E-07 | 4.28401 |
| TNF                 | 1.47E-07 | 4.28508 |
| SNF1LK              | 1.16E-08 | 4.2891  |
| CLU                 | 1.24E-10 | 4.29283 |
| ZC3HAV1             | 1.03E-08 | 4.29907 |
| DDX58               | 2.60E-12 | 4.30803 |
| ACSL1               | 6.06E-08 | 4.30937 |
| ---                 | 3.56E-06 | 4.3127  |
| MTUS1               | 1.26E-08 | 4.3164  |
| FAM83A              | 3.05E-07 | 4.35783 |
| CYLD                | 1.06E-06 | 4.36185 |
| MTUS1               | 4.99E-08 | 4.37598 |
| PPAP2B              | 1.36E-05 | 4.39532 |
| LTB                 | 9.71E-08 | 4.4144  |
| CCL5                | 1.92E-06 | 4.42138 |
| IFIT5               | 1.50E-10 | 4.43738 |
| SEC24A              | 4.43E-07 | 4.49934 |
| NFKB2               | 5.69E-08 | 4.51407 |
| BAG2                | 3.78E-08 | 4.52132 |
| DTNA                | 5.68E-09 | 4.53494 |
| ICAM1               | 9.34E-09 | 4.54765 |
| SAMD9               | 2.07E-06 | 4.55024 |
| LOC100128718        | 1.10E-05 | 4.56928 |
| TNFSF10             | 6.97E-09 | 4.6049  |
| WNT2B               | 3.59E-06 | 4.61484 |
| JUB                 | 1.95E-07 | 4.61615 |

|                  |          |         |
|------------------|----------|---------|
| HS6ST2           | 0.0001   | 4.62908 |
| PARP10           | 9.81E-10 | 4.67842 |
| PPAP2A           | 9.12E-08 | 4.68175 |
| LOC338758        | 3.00E-09 | 4.69898 |
| OAS2             | 7.89E-06 | 4.73269 |
| DTX3L            | 8.42E-10 | 4.73692 |
| NEDD9            | 1.45E-08 | 4.74639 |
| XAF1             | 3.46E-05 | 4.75361 |
| BST2             | 2.71E-07 | 4.76309 |
| OAS3             | 2.30E-08 | 4.77847 |
| TNFAIP2          | 3.74E-09 | 4.7837  |
| P2RY2            | 3.10E-07 | 4.8033  |
| RAB27B           | 1.17E-07 | 4.81509 |
| BHLHB3           | 3.86E-08 | 4.86034 |
| ---              | 1.20E-06 | 4.86663 |
| TAP1             | 1.89E-09 | 4.87157 |
| JMJD3            | 5.15E-05 | 4.9169  |
| PPAP2A           | 5.96E-12 | 4.92437 |
| USP35            | 3.90E-09 | 4.93548 |
| TncRNA           | 1.33E-09 | 5.04924 |
| ONECUT2          | 4.22E-06 | 5.0766  |
| DDX58            | 1.07E-12 | 5.11457 |
| PHLDB2           | 1.22E-07 | 5.12304 |
| DUSP10           | 2.40E-06 | 5.21111 |
| LTB4DH           | 1.05E-08 | 5.25694 |
| TNFSF10          | 1.07E-06 | 5.32689 |
| HERC6            | 2.37E-10 | 5.35628 |
| TEX14            | 4.42E-09 | 5.36219 |
| DSCR8            | 5.83E-09 | 5.36941 |
| HS6ST2           | 2.07E-06 | 5.37949 |
| SERHL /// SERHL2 | 3.52E-06 | 5.40081 |
| OAS1             | 5.22E-12 | 5.48119 |
| SLC7A11          | 1.03E-08 | 5.49012 |
| LINCR            | 1.57E-05 | 5.619   |
| BICD1            | 1.45E-06 | 5.62461 |
| SAMD9            | 1.94E-08 | 5.73973 |
| DTNA             | 4.83E-10 | 5.74603 |
| LOC100130506     | 3.53E-08 | 5.83127 |
| ST7L             | 1.33E-08 | 5.87652 |
| SERHL /// SERHL2 | 3.73E-06 | 5.89601 |
| LOC387763        | 8.96E-08 | 6.01908 |
| FAM13A1          | 9.89E-09 | 6.02708 |
| LOX              | 7.92E-08 | 6.03328 |
| OAS1             | 5.79E-09 | 6.03837 |
| STC2             | 7.22E-08 | 6.09721 |
| UBE2L6           | 1.79E-11 | 6.10302 |
| ACSL1            | 5.34E-09 | 6.1694  |
| HERC5            | 7.95E-09 | 6.26778 |
| KYNU             | 1.69E-08 | 6.4516  |



|                |          |         |
|----------------|----------|---------|
| PLAU           | 1.60E-11 | 6.46253 |
| ---            | 4.42E-07 | 6.53313 |
| LOC645431      | 4.58E-10 | 6.58422 |
| MAP2           | 2.93E-08 | 6.67213 |
| LAMP3          | 1.76E-06 | 6.75254 |
| IL32           | 8.20E-05 | 6.77936 |
| USP18          | 2.29E-11 | 6.7822  |
| GDF15          | 2.33E-12 | 6.82644 |
| ---            | 1.80E-06 | 6.8551  |
| GBP3           | 1.50E-05 | 6.95434 |
| INPP4B         | 1.91E-09 | 7.01093 |
| DHRS3          | 1.20E-07 | 7.0949  |
| CCL5           | 1.01E-07 | 7.16935 |
| IFIT2          | 1.14E-06 | 7.30856 |
| IFI27          | 6.23E-11 | 7.36763 |
| TMEM140        | 9.45E-07 | 7.65271 |
| BATF           | 7.66E-09 | 7.68536 |
| TNFAIP3        | 1.78E-10 | 8.00316 |
| DDIT3          | 2.57E-07 | 8.03184 |
| OASL           | 2.71E-08 | 8.06837 |
| CMPK2          | 3.83E-11 | 8.11619 |
| DDX60L         | 7.54E-06 | 8.42418 |
| ICAM1          | 3.10E-08 | 8.52258 |
| ---            | 1.06E-06 | 8.65566 |
| PHLDA1         | 2.59E-07 | 8.79549 |
| PHLDA1         | 7.56E-09 | 9.34881 |
| IFIT1          | 1.67E-12 | 9.53278 |
| DKFZp686L14188 | 7.89E-09 | 9.59751 |
| EDIL3          | 7.81E-08 | 9.72712 |
| ---            | 7.21E-09 | 9.98669 |
| IGFBP3         | 6.20E-10 | 9.99876 |
| LOX            | 4.66E-07 | 10.5703 |
| IRF1           | 3.26E-11 | 10.843  |
| OASL           | 3.87E-09 | 10.8669 |
| SLC7A11        | 3.78E-08 | 11.0964 |
| RND1           | 4.74E-09 | 11.2597 |
| VTCN1          | 3.83E-08 | 11.3381 |
| TNFAIP3        | 3.78E-09 | 11.556  |
| SLC41A2        | 6.10E-07 | 11.5627 |
| PSMB9          | 6.71E-09 | 11.7996 |
| NKX3-1         | 3.98E-09 | 12.1563 |
| IFI44L         | 4.02E-11 | 12.2635 |
| SALL4          | 3.86E-10 | 12.8257 |
| ---            | 8.51E-09 | 12.8576 |
| RPS6KA2        | 1.73E-07 | 13.06   |
| DDX60          | 3.97E-10 | 13.1854 |
| HSPB8          | 5.81E-11 | 14.6075 |
| TSKU           | 5.80E-11 | 14.8933 |
| ---            | 9.17E-09 | 15.7217 |

|                |          |         |
|----------------|----------|---------|
| PSMB8          | 1.42E-07 | 16.8318 |
| CXCL3          | 1.08E-08 | 17.4479 |
| IGFBP3         | 1.78E-08 | 18.0434 |
| ATF3           | 8.75E-10 | 18.44   |
| RSAD2          | 1.03E-08 | 18.8767 |
| IFI44          | 3.21E-08 | 18.93   |
| CCL2           | 4.16E-08 | 19.0216 |
| PLAU           | 1.05E-14 | 19.1536 |
| CXCL2          | 1.15E-15 | 19.3399 |
| IFIT2          | 4.77E-10 | 19.5489 |
| IFI44          | 4.11E-10 | 20.0077 |
| OAS2           | 1.83E-08 | 21.5426 |
| OAS2           | 4.75E-08 | 23.4529 |
| RARRES3        | 1.33E-11 | 24.0669 |
| RSAD2          | 1.45E-10 | 25.8892 |
| APOD           | 2.27E-11 | 26.6445 |
| GABBR1 /// UBD | 1.95E-10 | 31.9878 |
| IFIT3          | 1.11E-10 | 34.1537 |
| IGFL1          | 6.43E-12 | 34.565  |
| IFIT3          | 8.52E-11 | 35.2451 |
| LMCD1          | 4.77E-08 | 35.4489 |
| CCL20          | 1.12E-11 | 46.0615 |
| XAF1           | 3.60E-10 | 52.6929 |
| LOC284561      | 9.22E-15 | 62.2903 |
| XAF1           | 1.11E-11 | 84.3321 |
